# Supplementary material for: Machine learning identifies activation of RUNX/AP-1 as drivers of mesenchymal and fibrotic regulatory programs in gastric cancer
Source: HighWire-hosted journal article supplement (doi:10.1101/gr.278565.123), 2024-05-01
Supplement: Supplemental_Information.pdf [file Supplemental_Information.pdf]

Supplemental Fig. S1) Average ATAC-seq signal in Mes-like and Epi-like differentially accessible peaks (n=2000 peaks in each set)

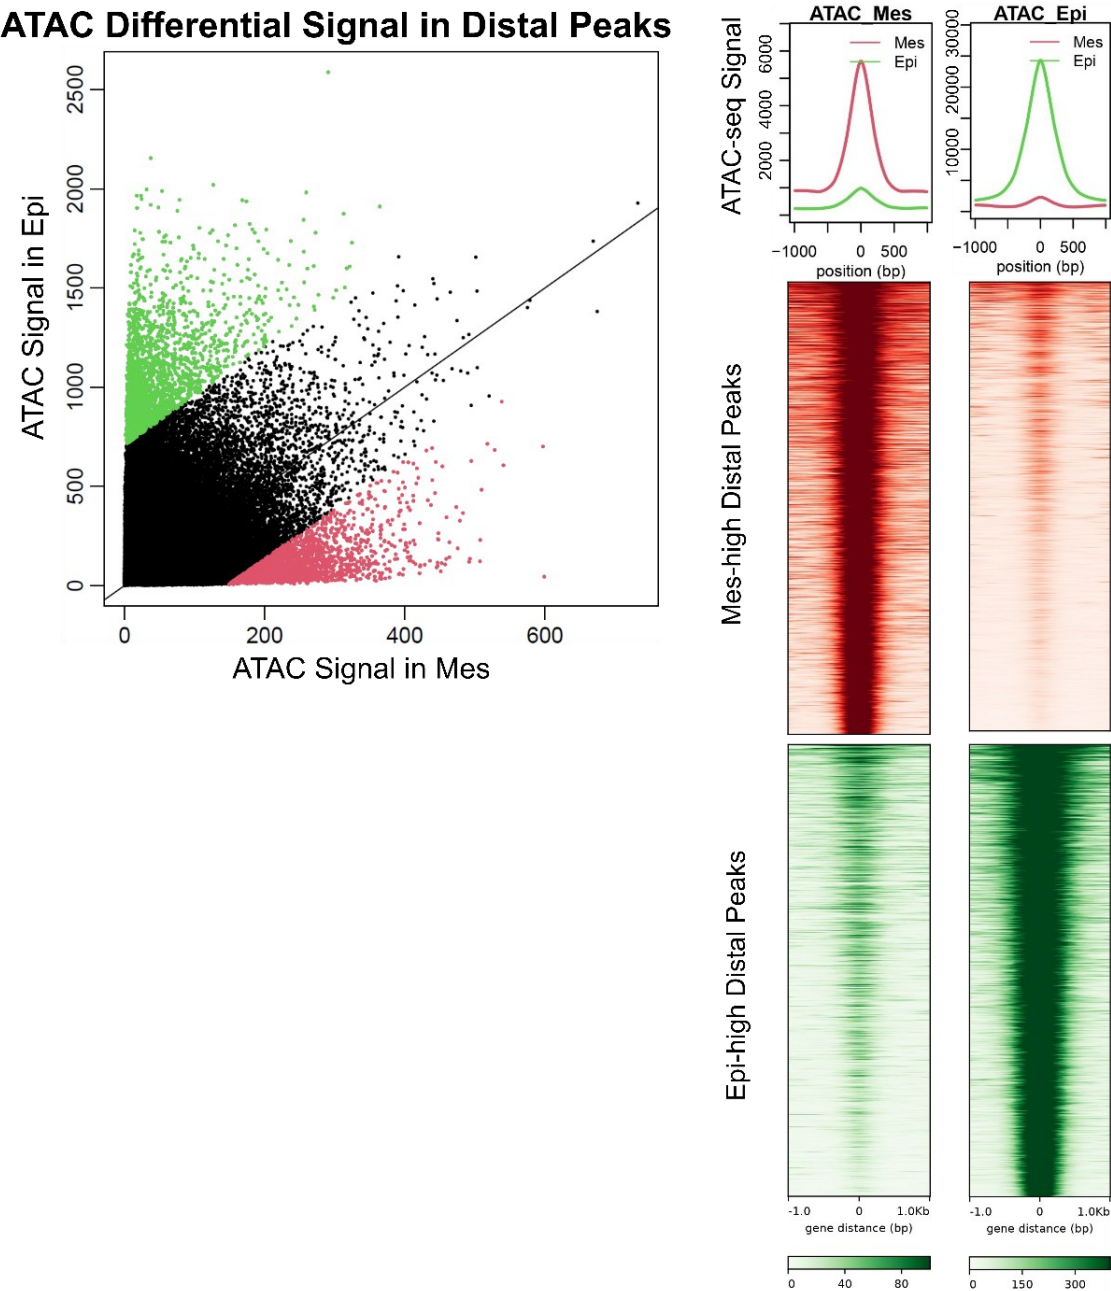

Distal ATAC peaks with the highest accessibility differences between Mes and Epi GC cell lines (2000 Mes-high & 2000 Epi-high peaks) are shown.

Supplemental Fig. S2) Statistical Validation of ATAC Signal Differences between Mes-high and Epi-high Peaks

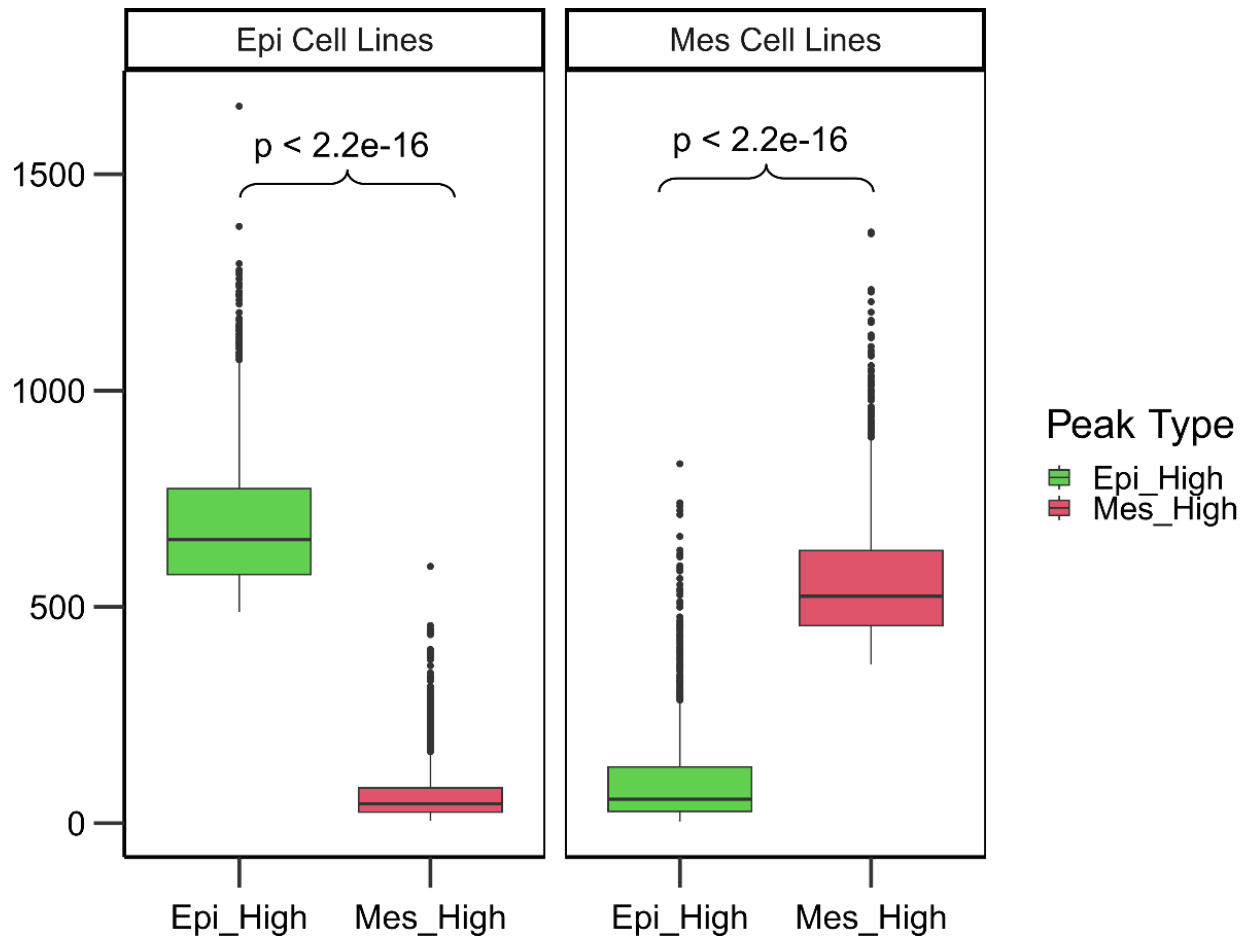

We used linear regression to find top 2000 differentially accessible Mes-high and top 2000 Epi-high peaks. As expected, the  $t$ -test shows a significant difference between the ATAC signal of Mes-high and Epi-high peaks.

Supplemental Fig. S3) Active Motifs in Differentially Accessible Peaks in Mes vs. Epi Cell Line ATAC-seq (2000 Mes-high vs. 2000 Epi-high peaks)

| N  | ID   | Motif    | W     | Z     | I    | W | Z | I |                                                                                       |
|----|------|----------|-------|-------|------|---|---|---|---------------------------------------------------------------------------------------|
| 1  | 1008 | RUNX2    | 1.00  | 2.77  | 0.51 |   |   |   | 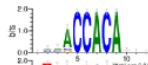   |
| 2  | 895  | AP-1     | 0.90  | 4.04  | 1.00 |   |   |   |    |
| 3  | 1150 | TEAD     | 0.60  | 2.37  | 0.25 |   |   |   |    |
| 4  | 629  | Tbp      | 0.30  | 0.61  | 0.13 |   |   |   |    |
| 5  | 1891 | TGIF2LX  | 0.25  | 0.14  | 0.12 |   |   |   |    |
| 6  | 1428 | GLI2     | 0.21  | 1.07  | 0.11 |   |   |   |    |
| 7  | 1661 | NR2F1    | 0.20  | -0.43 | 0.08 |   |   |   |    |
| 8  | 1956 | ZNF384   | 0.15  | 0.35  | 0.08 |   |   |   |    |
| 9  | 1464 | HNF4A    | -0.16 | -3.10 | 0.08 |   |   |   |    |
| 10 | 46   | FREAC4   | -0.20 | -3.23 | 0.07 |   |   |   |    |
| 11 | 1393 | FOXE1    | -0.27 | -2.06 | 0.08 |   |   |   |   |
| 12 | 89   | HNF1B    | -0.51 | -2.92 | 0.40 |   |   |   |  |
| 13 | 80   | HNF4-01- | -0.53 | -2.78 | 0.19 |   |   |   |  |
| 14 | 222  | Lef1     | -0.71 | -4.20 | 0.67 |   |   |   |  |
| 15 | 339  | AREB6    | -0.73 | -4.52 | 0.31 |   |   |   |  |
| 16 | 1059 | FOXA1:AR | -0.77 | -2.29 | 0.36 |   |   |   |  |
| 17 | 1436 | GRHL2    | -0.86 | -3.24 | 0.56 |   |   |   |  |
| 18 | 1146 | KLF5     | -1.04 | -3.22 | 0.64 |   |   |   |  |
| 19 | 1094 | Gata2    | -1.18 | -4.24 | 0.99 |   |   |   |  |
| 20 | 1072 | E2A      | -1.38 | -4.81 | 0.91 |   |   |   |  |

Top 2000 differentially accessible distal peaks between Mes-like and Epi-like GC cell lines (Supplemental Fig. S1) were compared to identify known TFBS DNA motifs, using gkmPWM.

*W* is the normalized weight for a particular motif found using lasso regression to explain the gapped *k*-mer (gkmSVM) weight space. *Z* is the approximate location of the motif on the gkmSVM weight distribution in terms of z-score, and *I* is the relative increase in error when removing the TF/motif from the list.

Supplemental Fig. S4) Active Motifs in Differentially Accessible Peaks in TCGA-STAD Primary Tumor vs. Normal Adult Stomach ATAC-seq

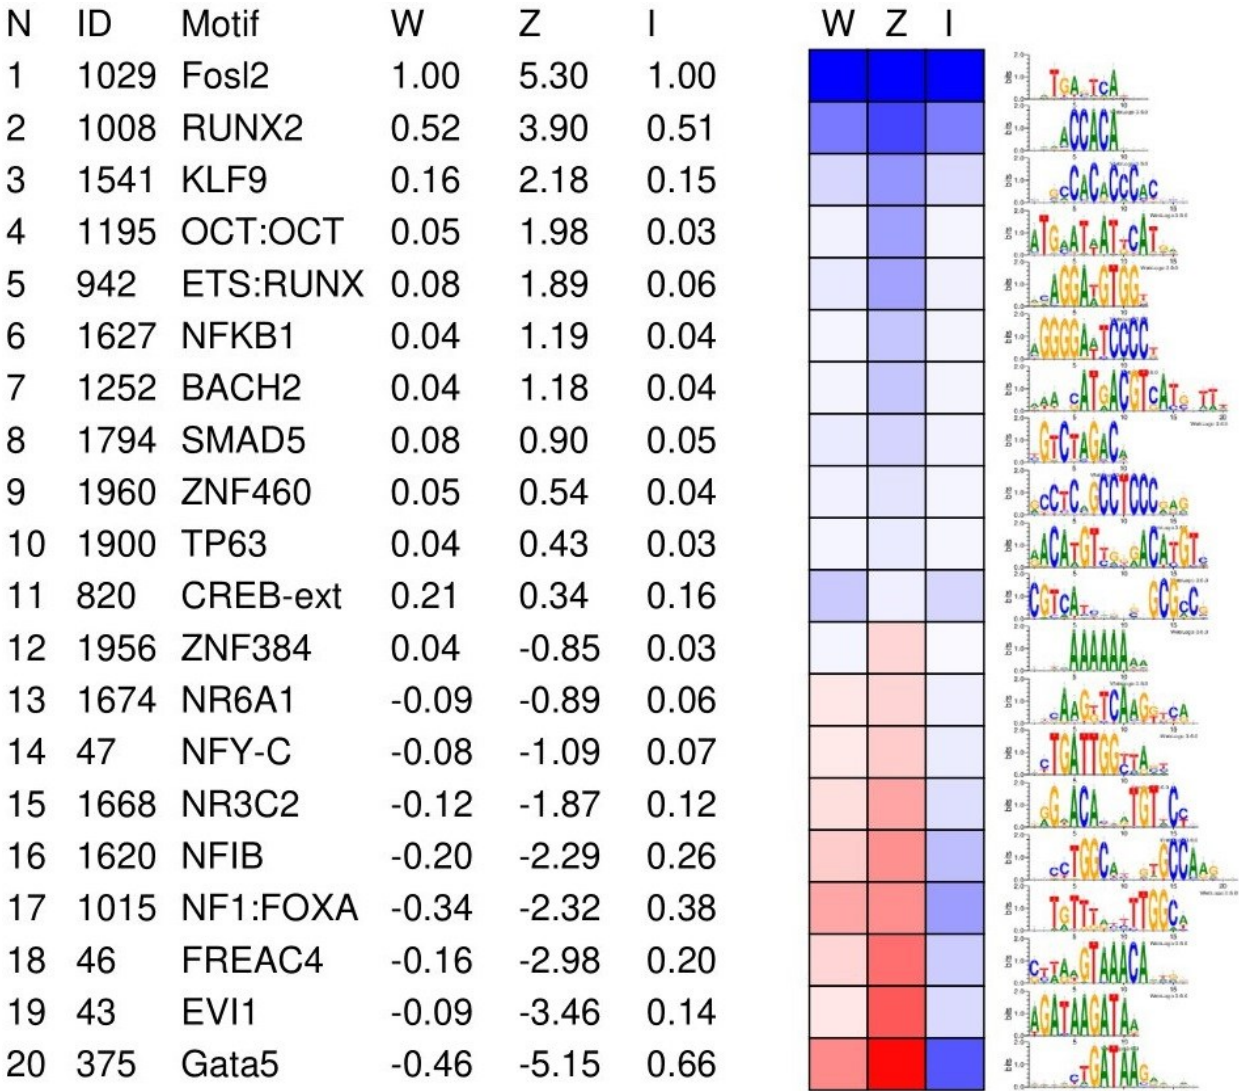

Top 2000 differentially accessible distal peaks between TCGA-STAD (TCGA-BR-A4J6) and healthy adult stomach (ENCODE ENCBS441WEO) were compared to identify TFBS DNA motifs, using gkmPWM.



# Supplemental Fig. S5) Active Motifs in Differentially Accessible Peaks in All TCGA-STAD Primary Tumors vs. Normal Adult Stomach ATAC-seq

## TCGA-STAD ATAC (blue) vs. Normal Stomach (red, ENCODE:ENCBS441WEO)

| N  | ID   | Motif    | W     | Z     | I    | W | Z | I | N  | ID   | Motif    | W     | Z     | I    | W | Z | I |
|----|------|----------|-------|-------|------|---|---|---|----|------|----------|-------|-------|------|---|---|---|
| 1  | 1377 | FOSL2    | 1.00  | 7.62  | 1.00 |   |   |   | 1  | 1164 | KLF3     | 1.00  | 3.87  | 1.00 |   |   |   |
| 2  | 1527 | Klf1     | 0.88  | 3.99  | 0.42 |   |   |   | 2  | 137  | NFE2     | 0.57  | 3.25  | 0.56 |   |   |   |
| 3  | 1463 | HNF4A    | 0.40  | 3.02  | 0.09 |   |   |   | 3  | 1628 | NFKB2    | 0.21  | 2.20  | 0.18 |   |   |   |
| 4  | 1464 | HNF4A    | 0.15  | 2.42  | 0.04 |   |   |   | 4  | 39   | ISRE     | 0.31  | 1.98  | 0.26 |   |   |   |
| 5  | 1270 | CDX1     | 0.28  | 1.87  | 0.05 |   |   |   | 5  | 1464 | HNF4A    | 0.07  | 1.28  | 0.03 |   |   |   |
| 6  | 1627 | NFKB1    | 0.11  | 1.26  | 0.06 |   |   |   | 6  | 1221 | ZSCAN22  | 0.20  | 1.27  | 0.09 |   |   |   |
| 7  | 600  | Six6     | 0.30  | 1.13  | 0.07 |   |   |   | 7  | 942  | ETS:RUNX | 0.18  | 1.19  | 0.07 |   |   |   |
| 8  | 1777 | Rxra     | 0.07  | 1.08  | 0.01 |   |   |   | 8  | 577  | MEIS1    | 0.77  | 1.14  | 0.35 |   |   |   |
| 9  | 261  | NRF2     | 0.32  | 1.01  | 0.07 |   |   |   | 9  | 1947 | ZNF24    | 0.11  | 0.90  | 0.07 |   |   |   |
| 10 | 826  | EGR1     | 0.19  | 0.92  | 0.06 |   |   |   | 10 | 86   | ELK1     | 0.32  | 0.80  | 0.12 |   |   |   |
| 11 | 176  | Zfp410   | 0.19  | 0.81  | 0.03 |   |   |   | 11 | 54   | RREB1    | 0.19  | 0.72  | 0.09 |   |   |   |
| 12 | 1036 | YY1      | 0.12  | 0.62  | 0.03 |   |   |   | 12 | 1923 | ZBTB32   | 0.21  | 0.69  | 0.09 |   |   |   |
| 13 | 59   | MEIS1BHO | 0.18  | 0.53  | 0.03 |   |   |   | 13 | 1955 | ZNF382   | 0.21  | 0.29  | 0.12 |   |   |   |
| 14 | 1955 | ZNF382   | 0.17  | 0.41  | 0.04 |   |   |   | 14 | 1792 | SMAD3    | 0.09  | 0.11  | 0.04 |   |   |   |
| 15 | 35   | STAF     | 0.21  | 0.33  | 0.04 |   |   |   | 15 | 46   | FREAC4   | -0.23 | -1.69 | 0.12 |   |   |   |
| 16 | 46   | FREAC4   | -0.19 | -1.33 | 0.04 |   |   |   | 16 | 43   | EVI1     | -0.14 | -2.43 | 0.09 |   |   |   |
| 17 | 239  | Gm397    | -0.26 | -1.44 | 0.06 |   |   |   | 17 | 1181 | PGR      | -0.49 | -2.70 | 0.36 |   |   |   |
| 18 | 1181 | PGR      | -0.35 | -2.01 | 0.10 |   |   |   | 18 | 1015 | NF1:FOXA | -0.73 | -3.02 | 0.53 |   |   |   |
| 19 | 1620 | NFIB     | -0.45 | -2.36 | 0.21 |   |   |   | 19 | 1620 | NFIB     | -0.69 | -3.06 | 0.88 |   |   |   |
| 20 | 1015 | NF1:FOXA | -0.77 | -2.76 | 0.32 |   |   |   | 20 | 375  | Gata5    | -0.58 | -3.47 | 0.32 |   |   |   |

## TCGA-CD-A48C (STAD1)

| N  | ID   | Motif    | W     | Z     | I    | W | Z | I |
|----|------|----------|-------|-------|------|---|---|---|
| 1  | 1106 | Fra1     | 0.85  | 5.55  | 0.67 |   |   |   |
| 2  | 1146 | KLF5     | 1.00  | 5.31  | 1.00 |   |   |   |
| 3  | 1463 | HNF4A    | 0.39  | 4.00  | 0.21 |   |   |   |
| 4  | 80   | HNF4-01- | 0.11  | 3.18  | 0.02 |   |   |   |
| 5  | 1122 | HOXA2    | 0.26  | 3.08  | 0.12 |   |   |   |
| 6  | 1464 | HNF4A    | 0.06  | 2.52  | 0.02 |   |   |   |
| 7  | 1628 | NFKB2    | 0.13  | 1.74  | 0.11 |   |   |   |
| 8  | 1813 | Sox6     | 0.38  | 1.47  | 0.16 |   |   |   |
| 9  | 1086 | Cdx2     | 0.27  | 1.44  | 0.10 |   |   |   |
| 10 | 1221 | ZSCAN22  | 0.12  | 0.99  | 0.05 |   |   |   |
| 11 | 40   | PAX5     | 0.32  | 0.78  | 0.11 |   |   |   |
| 12 | 59   | MEIS1BHO | 0.12  | 0.66  | 0.03 |   |   |   |
| 13 | 1792 | SMAD3    | 0.07  | 0.62  | 0.03 |   |   |   |
| 14 | 1890 | TGIF2    | 0.06  | 0.57  | 0.03 |   |   |   |
| 15 | 362  | Nkx3-1   | -0.15 | -0.90 | 0.05 |   |   |   |
| 16 | 1668 | NR3C2    | -0.14 | -1.85 | 0.07 |   |   |   |
| 17 | 375  | Gata5    | -0.32 | -2.27 | 0.16 |   |   |   |
| 18 | 1015 | NF1:FOXA | -0.43 | -2.68 | 0.25 |   |   |   |
| 19 | 1620 | NFIB     | -0.30 | -3.28 | 0.21 |   |   |   |
| 20 | 1619 | NFIA     | -0.50 | -4.79 | 0.18 |   |   |   |

## TCGA-VQ-A94O (STAD2)

| N  | ID   | Motif    | W     | Z     | I    | W | Z | I |
|----|------|----------|-------|-------|------|---|---|---|
| 1  | 1865 | TCF7L2   | 1.00  | 7.78  | 1.00 |   |   |   |
| 2  | 1008 | RUNX2    | 0.43  | 2.89  | 0.12 |   |   |   |
| 3  | 1270 | CDX1     | 0.13  | 2.53  | 0.02 |   |   |   |
| 4  | 316  | Zfp281   | 0.09  | 2.20  | 0.05 |   |   |   |
| 5  | 1628 | NFKB2    | 0.13  | 2.12  | 0.07 |   |   |   |
| 6  | 535  | Plagl1   | 0.10  | 1.93  | 0.03 |   |   |   |
| 7  | 1933 | ZIC1     | 0.08  | 1.59  | 0.02 |   |   |   |
| 8  | 1122 | HOXA2    | 0.17  | 1.49  | 0.04 |   |   |   |
| 9  | 38   | POLY-C   | 0.09  | 1.03  | 0.01 |   |   |   |
| 10 | 59   | MEIS1BHO | 0.12  | 0.85  | 0.03 |   |   |   |
| 11 | 1835 | Stat2    | 0.13  | 0.51  | 0.03 |   |   |   |
| 12 | 1944 | ZNF143   | 0.06  | 0.38  | 0.02 |   |   |   |
| 13 | 22   | GCNF     | -0.05 | -0.25 | 0.01 |   |   |   |
| 14 | 47   | NFY-C    | -0.08 | -1.07 | 0.02 |   |   |   |
| 15 | 46   | FREAC4   | -0.09 | -1.15 | 0.02 |   |   |   |
| 16 | 1280 | CLOCK    | -0.17 | -1.51 | 0.05 |   |   |   |
| 17 | 1015 | NF1:FOXA | -0.29 | -1.55 | 0.10 |   |   |   |
| 18 | 1748 | Rarb     | -0.13 | -1.66 | 0.06 |   |   |   |
| 19 | 1620 | NFIB     | -0.16 | -1.66 | 0.06 |   |   |   |
| 20 | 1227 | Ar       | -0.20 | -2.21 | 0.09 |   |   |   |

## TCGA-VQ-A8PJ (STAD5)

## TCGA-VQ-A91W (STAD6)

Top 2000 differentially accessible distal peaks between TCGA-STAD ATAC-seq samples and healthy adult stomach (ENCODE ENCBS441WEO) were compared to identify TFBS DNA motifs, using gkmPWM.

## Supplemental Fig. S5 Continued

### TCGA-STAD ATAC (blue) vs. Normal Stomach (red, ENCODE:ENCBS441WEO)

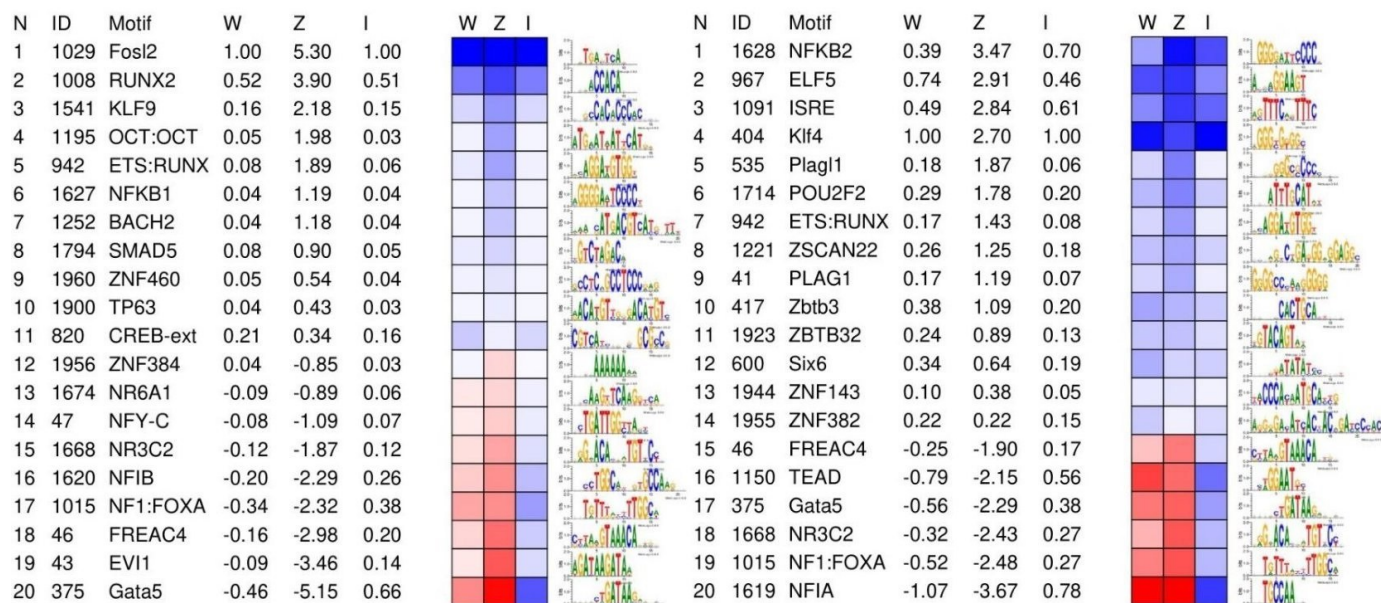

### TCGA-BR-A4J6 (STAD12)

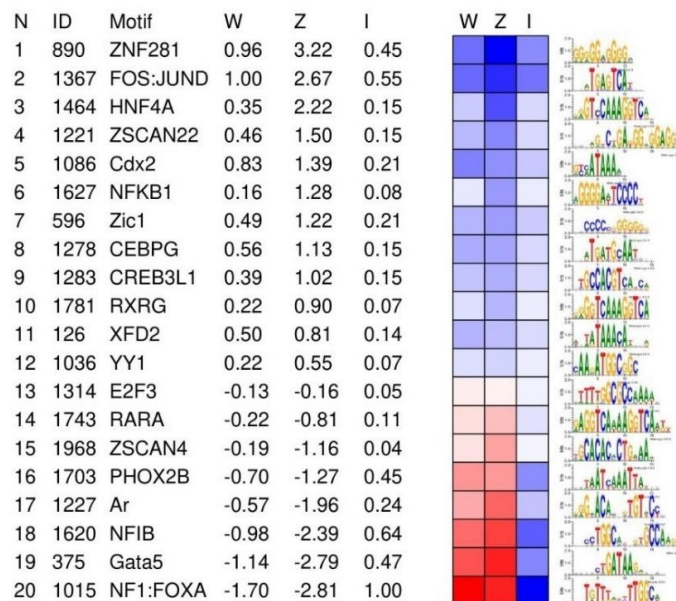

### TCGA-BR-A4IY (STAD13)

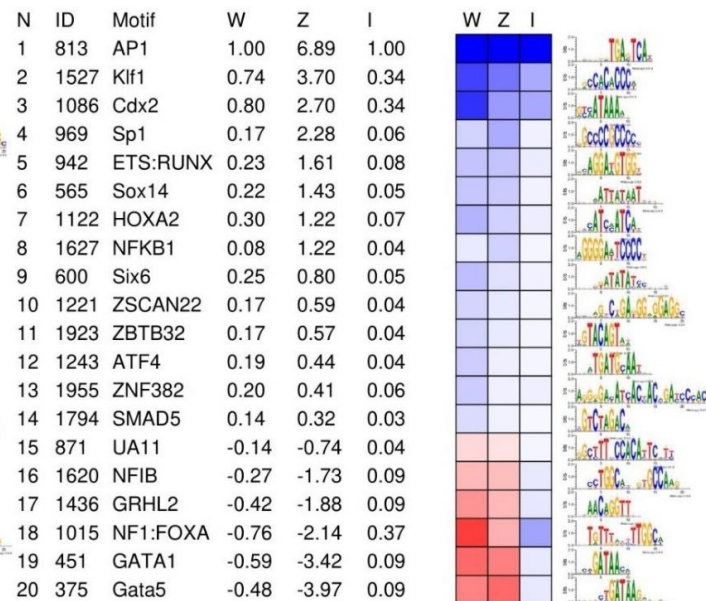

### TCGA-BR-A4CS (STAD14)

### TCGA-HF-A5NB (STAD16)

While there is significant heterogeneity among the tumor samples, and only a fraction of the cells in a tumor are likely in a mesenchymal state, we find significant evidence that the Mes-like regulatory program identified in the cell lines is activated in the STAD samples relative to normal stomach. All of the 10 STAD ATAC samples with >10k distal peaks detect some activation of RUNX or AP-1 when trained against normal stomach DHS (DHS\_882): 7 detect AP-1 (STAD1,2,5,12,14,16,19), and 7 detect RUNX (STAD2,6,12,13,16,19,21).



Supplemental Fig. S5 Continued

TCGA-STAD ATAC (blue) vs. Normal Stomach (red, ENCODE:ENCBS441WEO)

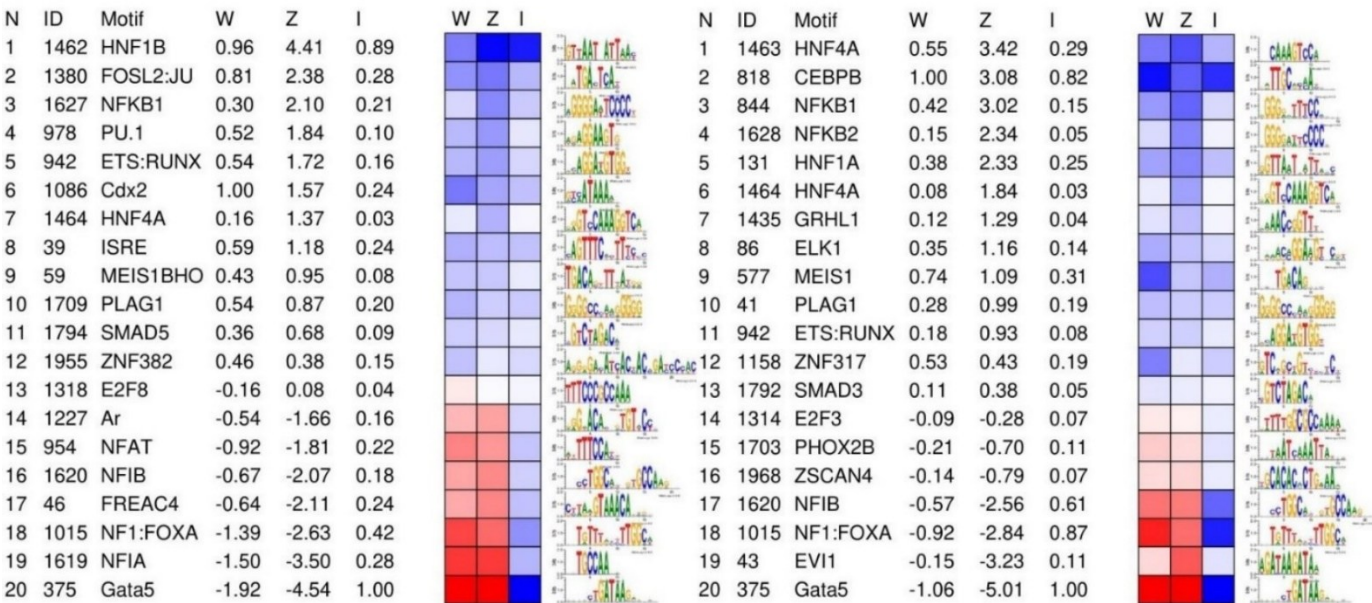

TCGA-BR-A4J4 (STAD19)

TCGA-CD-A486 (STAD21)

W is the normalized weight for a particular motif found using lasso regression to explain the gapped *k*-mer (gkmSVM) weight space. Z is the approximate location of the motif on the gkmSVM weight distribution in terms of z-score, and I is the relative increase in error when removing the TF/motif from the list.

Supplemental Fig. S6) LPS141 Transcriptional Profile Compared to GC Cell Lines

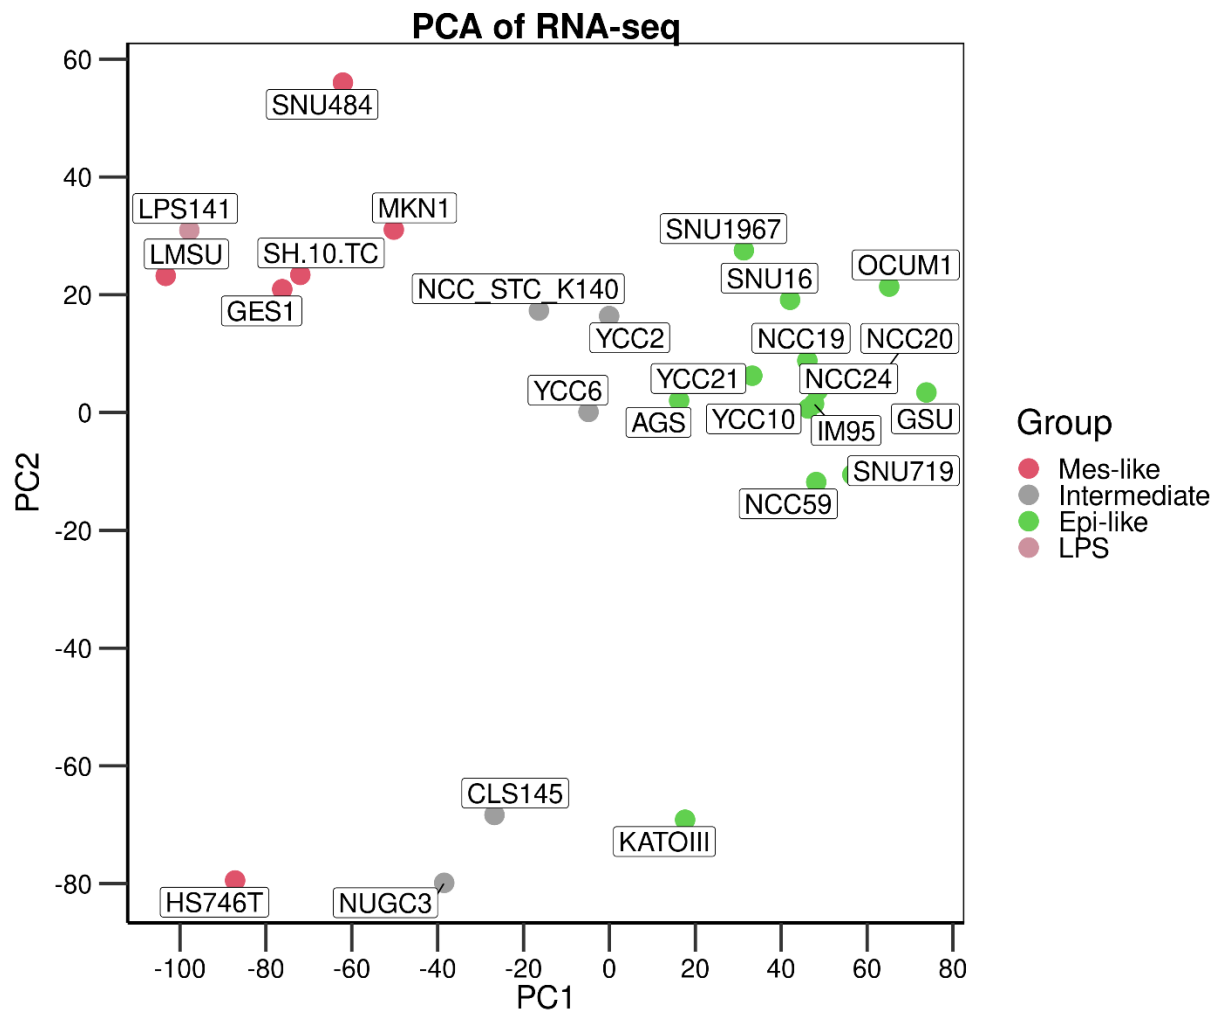

PCA of RNA-seq over ~11,300 tissue-specific (see Methods) protein-coding genes. LPS141 mesenchymal liposarcoma cell line has a very similar transcriptional profile to Mes-like GC cell lines.



Supplemental Fig. S7) Correlation Heatmap of RNA-seq in GC Cell Lines

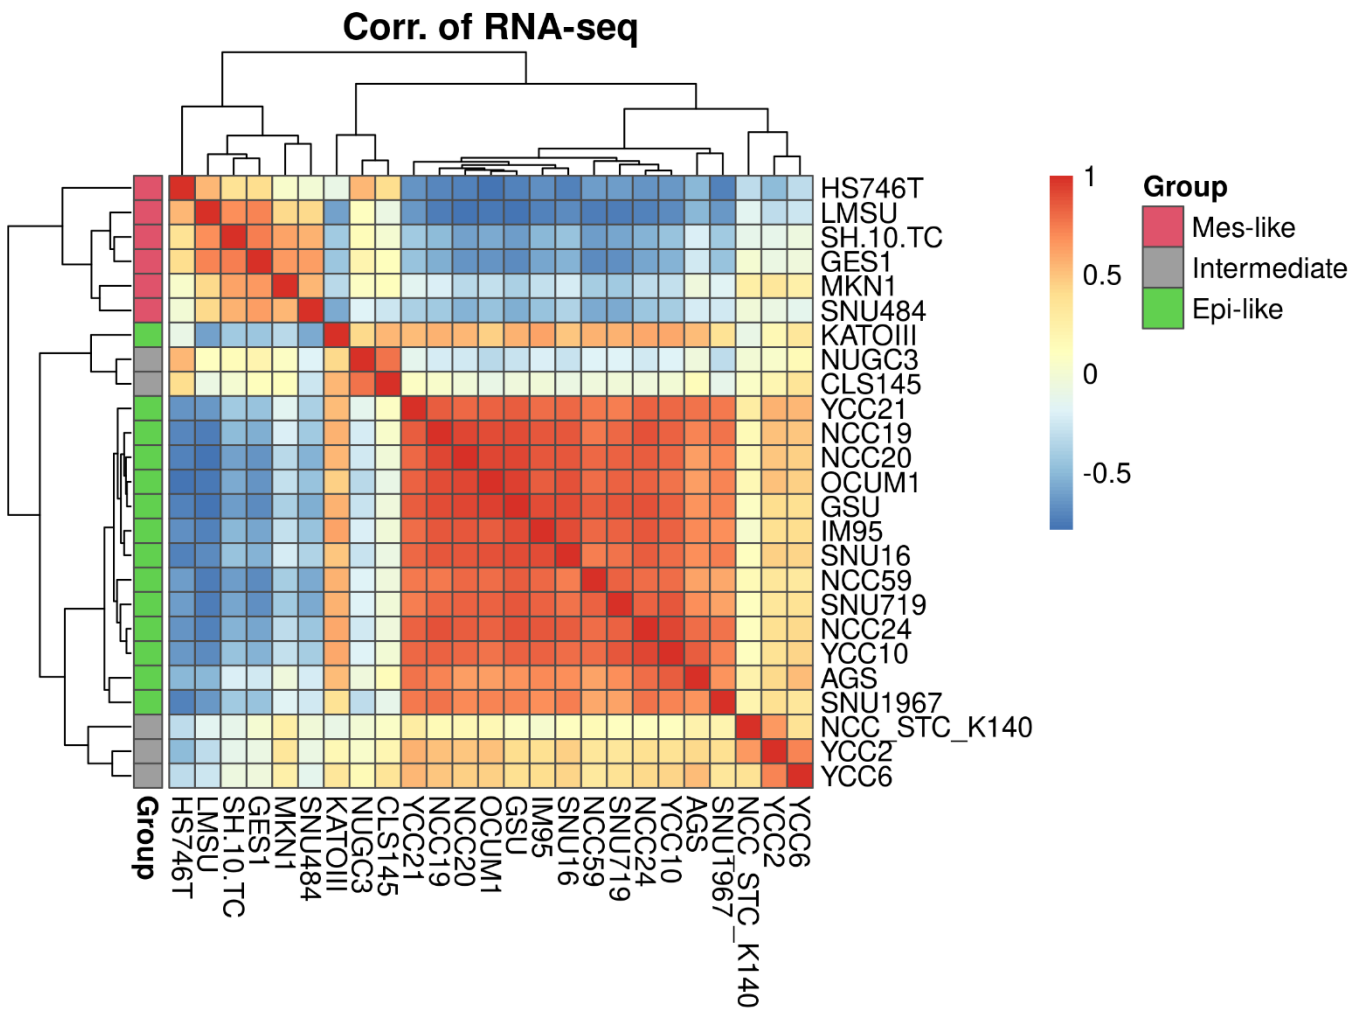

Correlation heatmap of RNA-seq profiles is consistent with the ATAC-seq clustering.

Supplemental Fig. S8) PC2 of RNA-seq PCA

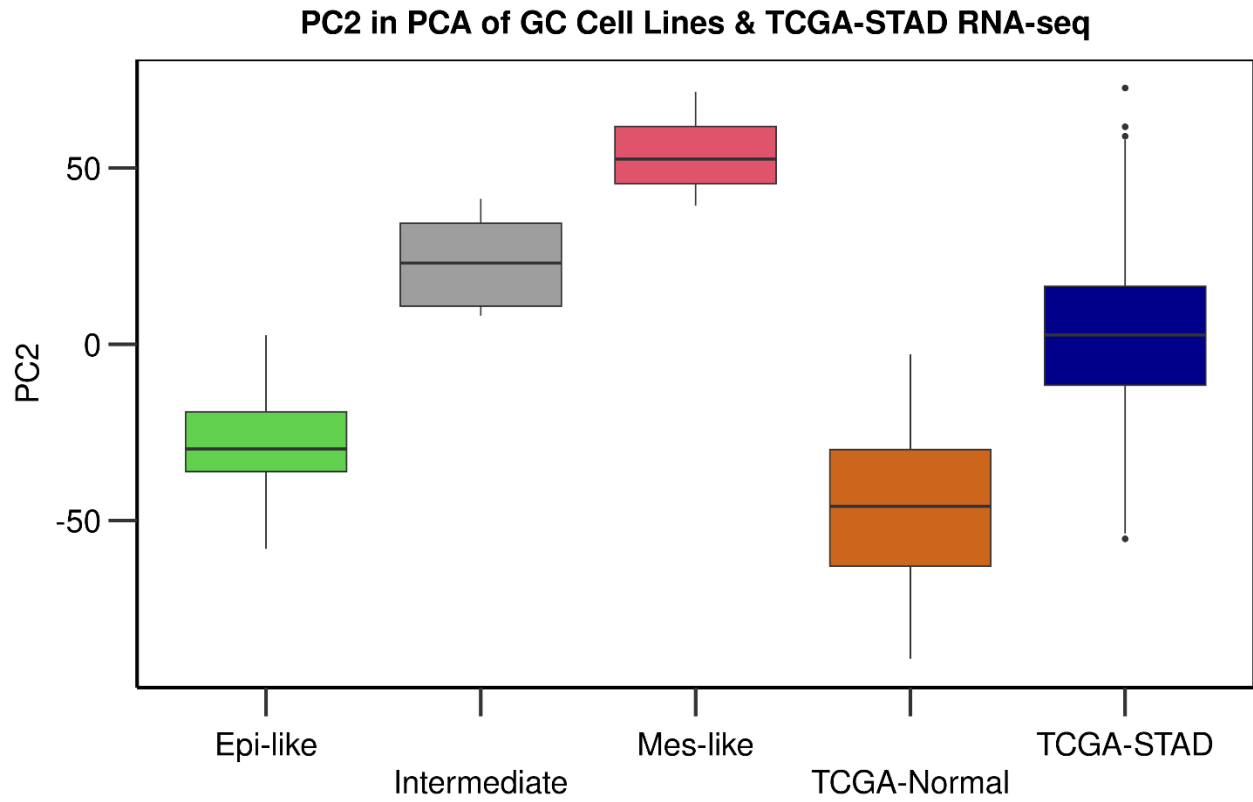

*t*-test p-values are:

- (Mes vs. Intermediate) =  $6 \times 10^{-3}$
- (Intermediate vs. Epi) =  $2 \times 10^{-4}$
- (TCGA-STAD vs. TCGA-Normal) =  $4 \times 10^{-7}$

# Supplemental Fig. S9) Gene Set Enrichment Analysis (GSEA) of Hallmark Gene Sets for Mes vs. Epi GC Cell Lines

| NAME                                       | SIZE | ES     | NES    | NOM p-val | FDR q-val | FWER p-val | RANK AT MAX |
|--------------------------------------------|------|--------|--------|-----------|-----------|------------|-------------|
| HALLMARK_EPITHELIAL_MESENCHYMAL_TRANSITION | 167  | 0.6537 | 1.7740 | 0.006787  | 0.127605  | 0.098      | 2157        |
| HALLMARK_UV_RESPONSE_DN                    | 109  | 0.5611 | 1.7649 | 0.002203  | 0.070798  | 0.11       | 1824        |
| HALLMARK_HEDGEHOG_SIGNALING                | 30   | 0.5001 | 1.4848 | 0.061674  | 0.459550  | 0.616      | 2714        |
| HALLMARK_ANGIOGENESIS                      | 32   | 0.4318 | 1.4159 | 0.064593  | 0.506993  | 0.759      | 2974        |
| HALLMARK_HYPOXIA                           | 137  | 0.3726 | 1.3525 | 0.110619  | 0.556421  | 0.839      | 2148        |
| HALLMARK_MYOGENESIS                        | 150  | 0.3575 | 1.1952 | 0.208333  | 0.898935  | 0.96       | 2591        |
| HALLMARK_SPERMATOGENESIS                   | 106  | 0.3149 | 1.1467 | 0.261851  | 0.920096  | 0.977      | 2599        |
| HALLMARK_COMPLEMENT                        | 151  | 0.2772 | 1.1057 | 0.291469  | 0.925865  | 0.986      | 2475        |
| HALLMARK_TGF_BETA_SIGNALING                | 31   | 0.3515 | 1.1021 | 0.375926  | 0.834174  | 0.988      | 2096        |
| HALLMARK_WNT_BETA_CATENIN_SIGNALING        | 27   | 0.3609 | 1.0843 | 0.350427  | 0.797242  | 0.991      | 1578        |
| HALLMARK_APICAL_JUNCTION                   | 137  | 0.2898 | 1.0344 | 0.402715  | 0.844931  | 0.997      | 1294        |
| HALLMARK_ALLOGRAFT_REJECTION               | 145  | 0.2656 | 1.0307 | 0.384804  | 0.782085  | 0.998      | 1433        |
| HALLMARK_G2M_CHECKPOINT                    | 125  | 0.4053 | 1.0194 | 0.49434   | 0.745905  | 0.999      | 5109        |
| HALLMARK_APOPTOSIS                         | 95   | 0.2420 | 0.9759 | 0.496659  | 0.784445  | 1          | 744         |
| HALLMARK_GLYCOLYSIS                        | 125  | 0.2200 | 0.9412 | 0.529175  | 0.800791  | 1          | 1030        |
| HALLMARK_APICAL_SURFACE                    | 37   | 0.3030 | 0.9257 | 0.551282  | 0.782200  | 1          | 2169        |
| HALLMARK_ADIPOGENESIS                      | 84   | 0.2313 | 0.9101 | 0.587054  | 0.764469  | 1          | 2506        |
| HALLMARK_COAGULATION                       | 112  | 0.2474 | 0.8992 | 0.633929  | 0.742667  | 1          | 2457        |
| HALLMARK_INFLAMMATORY_RESPONSE             | 163  | 0.2507 | 0.8852 | 0.602871  | 0.729837  | 1          | 1865        |
| HALLMARK_E2F_TARGETS                       | 113  | 0.3851 | 0.8851 | 0.617761  | 0.693487  | 1          | 5021        |
| HALLMARK_MITOTIC_SPINDLE                   | 108  | 0.2739 | 0.8659 | 0.575368  | 0.689749  | 1          | 4053        |
| HALLMARK_DNA_REPAIR                        | 46   | 0.2116 | 0.7971 | 0.636015  | 0.762965  | 1          | 4915        |
| HALLMARK_TNFA_SIGNALING_VIA_NFKB           | 146  | 0.2047 | 0.6804 | 0.826962  | 0.875369  | 1          | 2150        |

GSEA between Mes and Epi GC cell lines was performed using “Hallmark” gene sets.

Supplemental Fig. S10) GSEA Enrichment Plot for Hallmark of EMT Gene Set

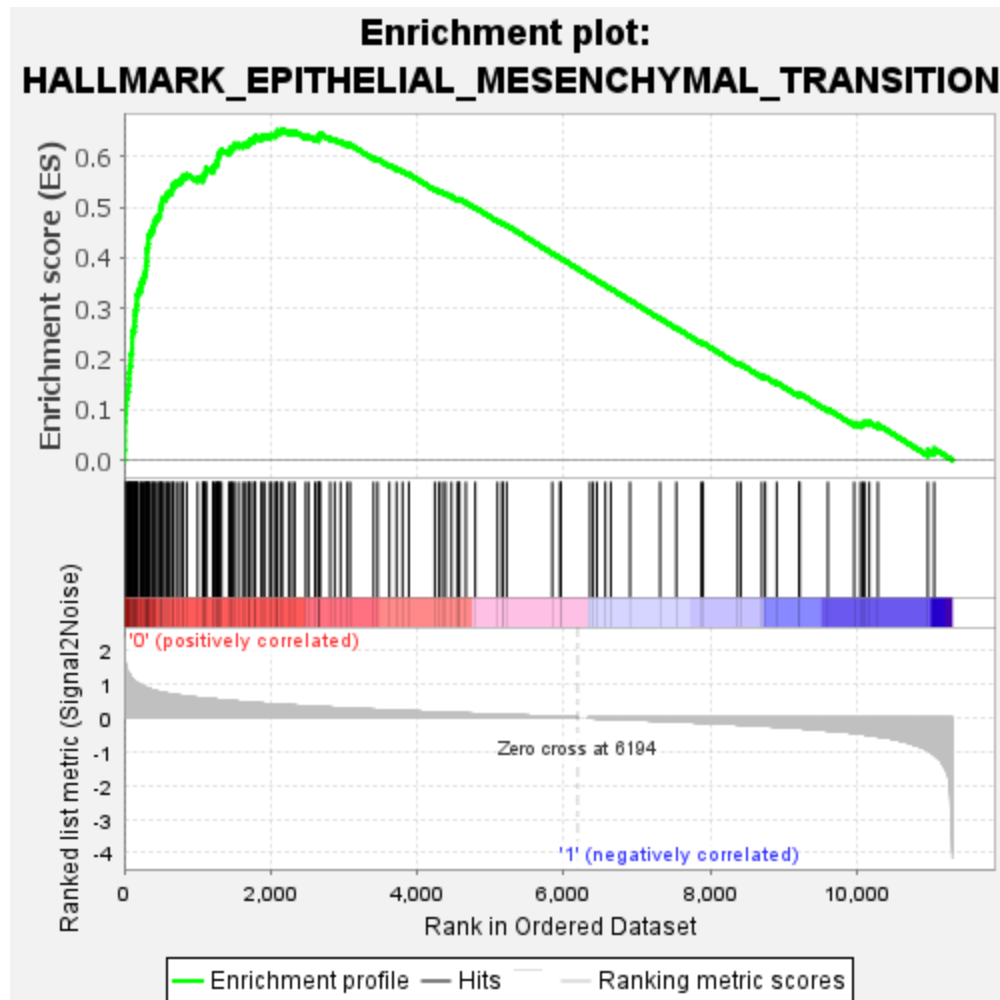

In the enrichment plot:

- Cluster 1: Epi-like GC Cell Lines
- Cluster 3: Mes-like GC Cell Lines



## Supplemental Fig. S11) TCGA-STAD KM-plot Based on Mes vs Epi TF Expression

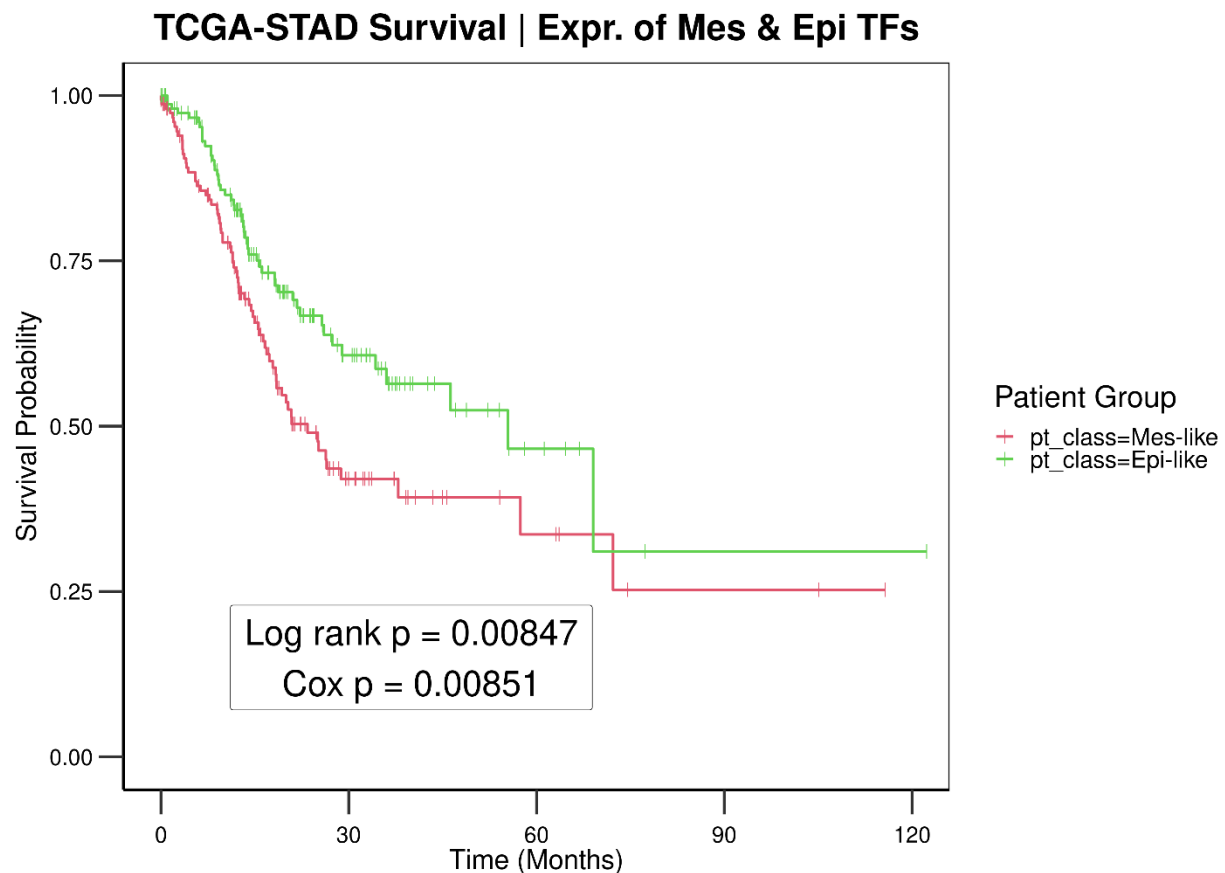

We calculated the difference between the expression of Mes and Epi differentially expressed TFs on TCGA-STAD RNA-seq. Mes and Epi TFs were defined from the differential gene expression analysis of the GC cell lines, and those differentially expressed genes that are TFs are used here for stratifying TCGA-STAD patients.

Difference = [Average(Mes TF expression) – Average(Epi TF expression)].

TCGA-STAD samples were sorted by the difference in the average expression of Mes vs. Epi TFs. Those with a differential value above the median were assigned to the STAD Mes-like patient group, and the rest of the STAD patients were assigned to the STAD Epi-like group for this survival plot (and similarly for ACRG survival plot Supplemental Fig. 2G).

## Supplemental Fig. S12 Continued

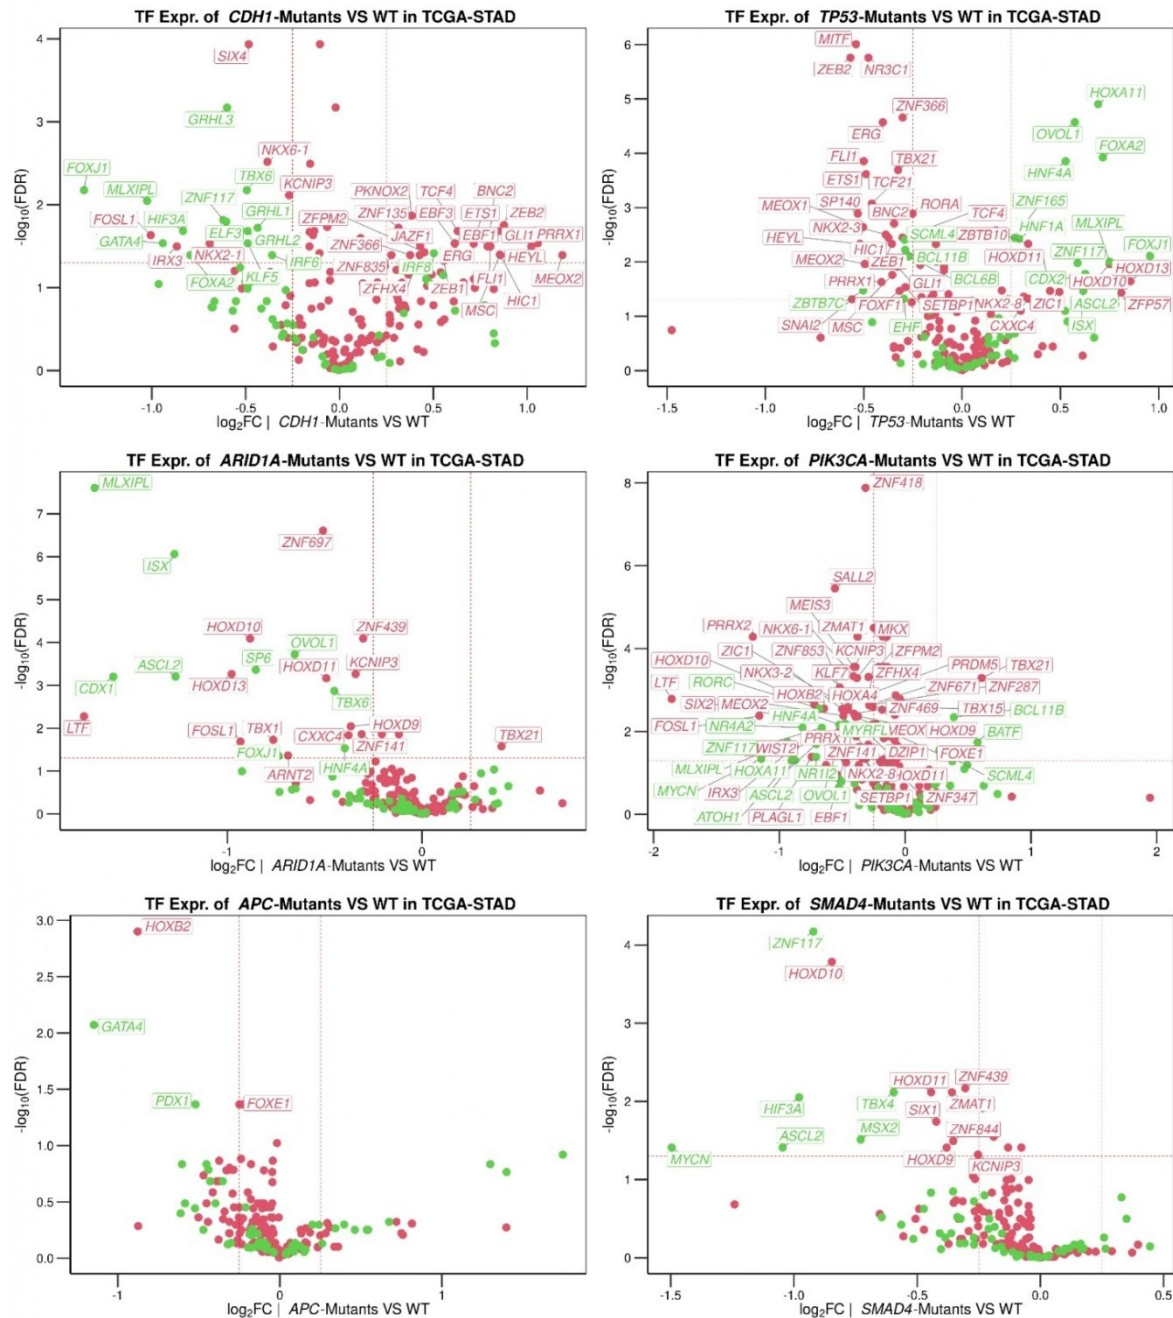

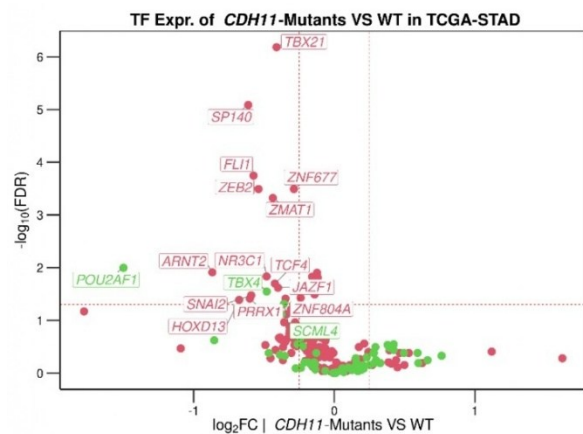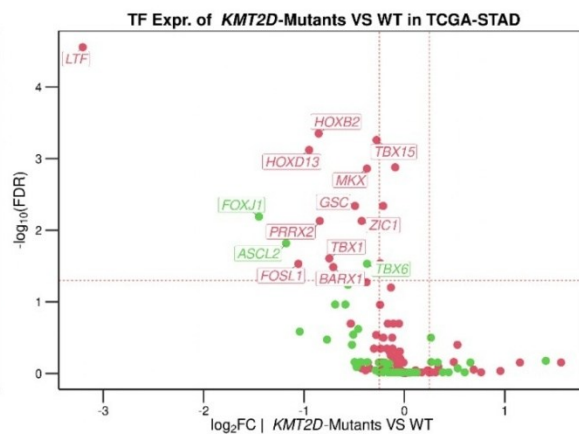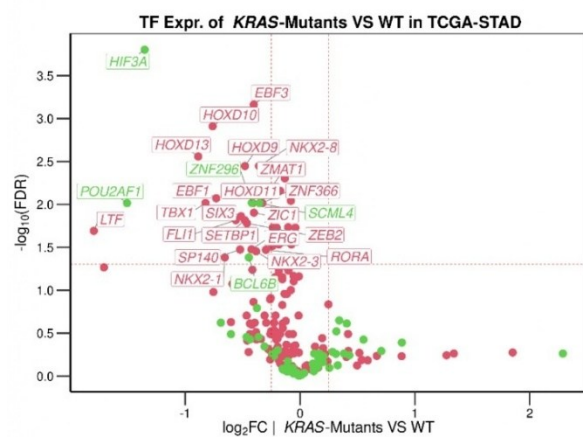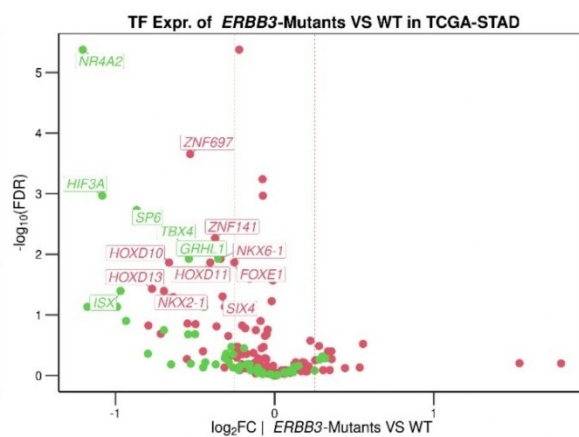

Supplemental Fig. S13) Copy Number Alteration Rates in TCGA-STAD

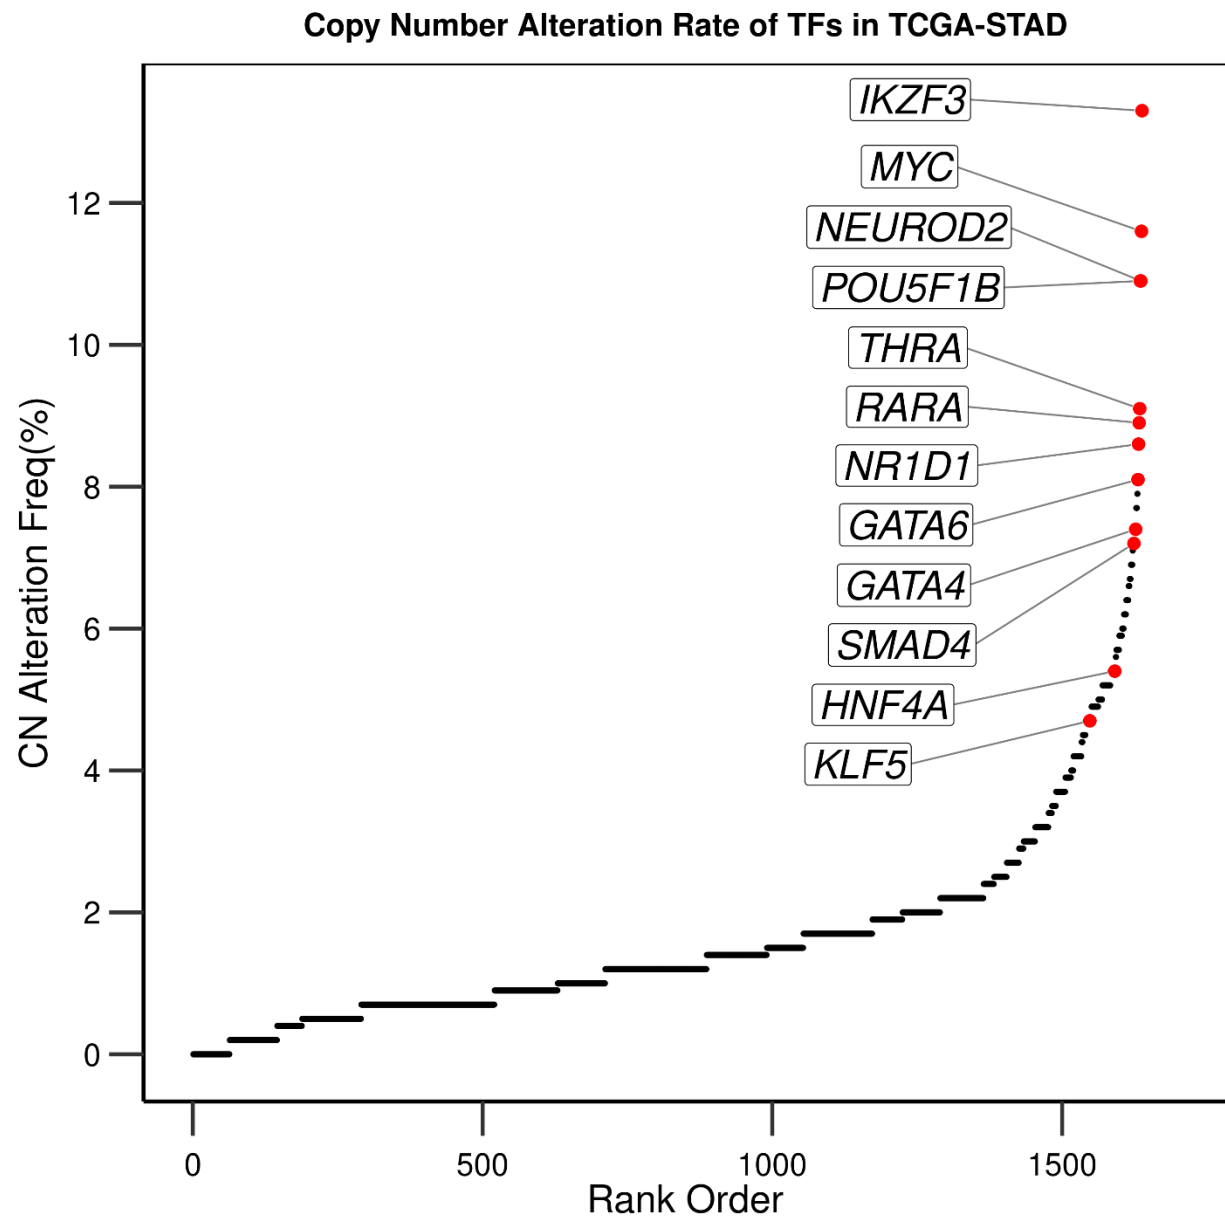

Copy number alteration = DNA copy number amplification rate + DNA copy number deletion rate



Supplemental Fig. S14) Correlation of GATA6 Enhancer (*E1*) Accessibility and *GATA6* Gene Expression

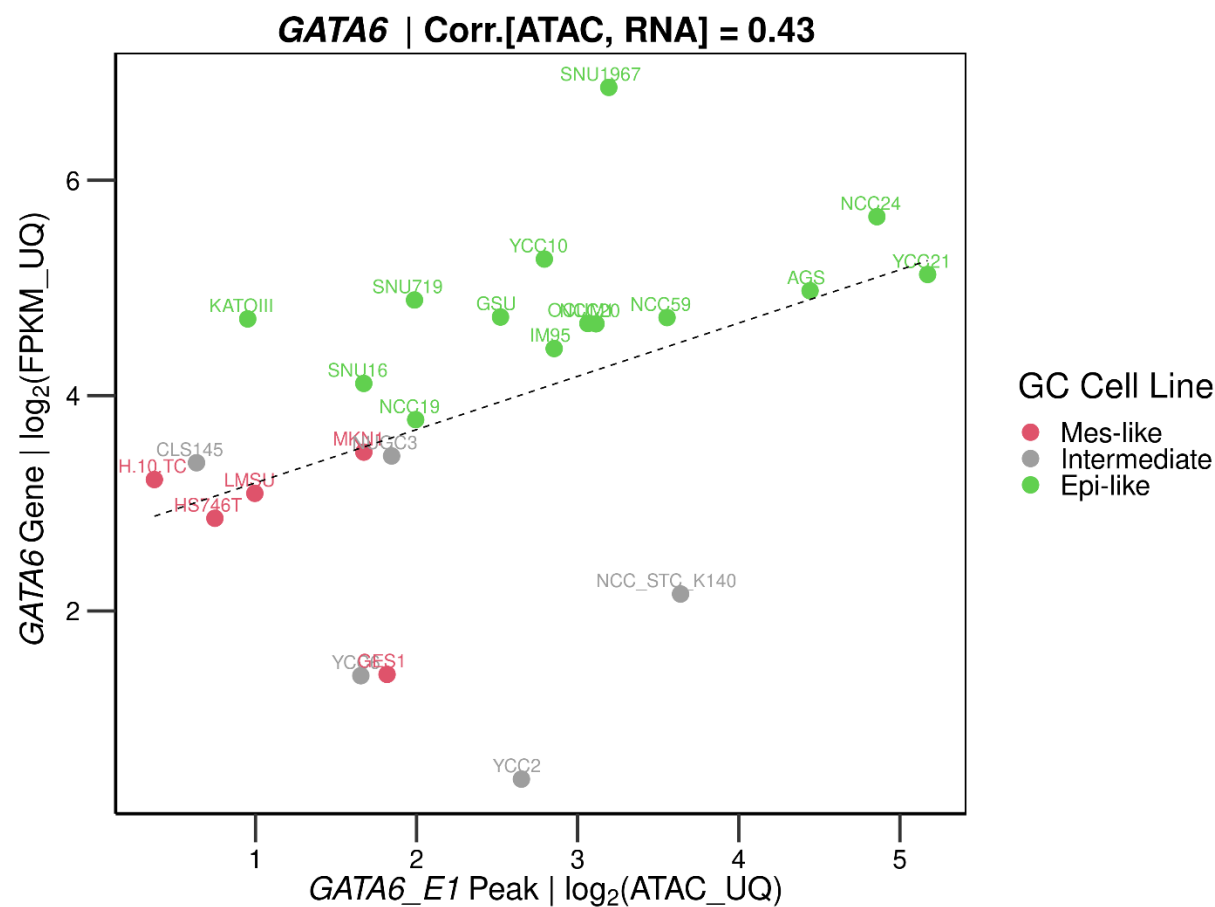

Pearson's correlation of [*GATA6* RNA, *GATA6\_E1* ATAC] signals. ATAC-seq and RNA-seq values are upper-quartile normalized.

Supplemental Fig. S15) Correlation of GATA6 Enhancer (E2) Accessibility and GATA6 Gene Expression

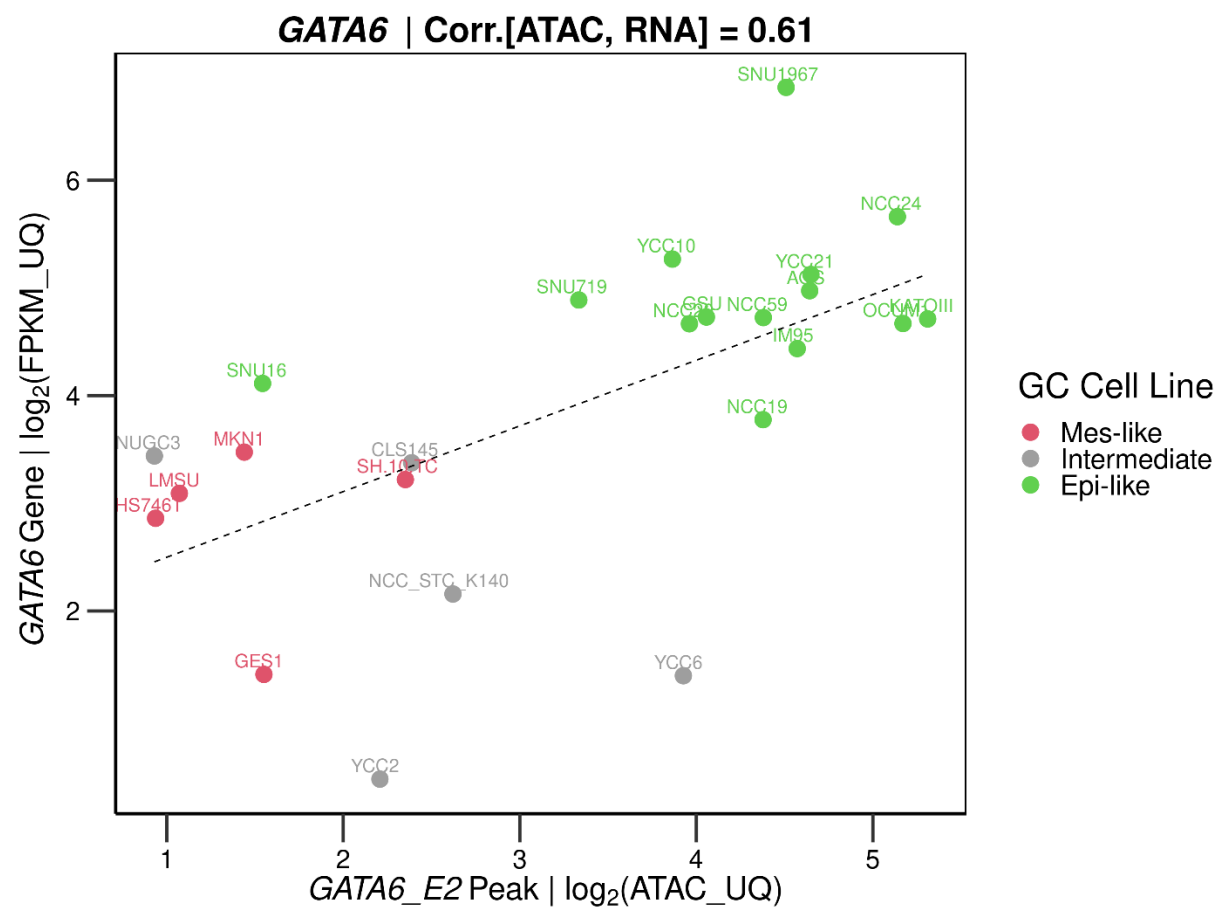

Pearson's correlation of [GATA6 RNA, GATA6\_E2 ATAC] signals. ATAC-seq and RNA-seq values are upper-quartile normalized.

Supplemental Fig. S16) Correlation of RNA-seq for GC Cell Lines and TCGA-STAD with ENCODE Primary Lung Fibroblast

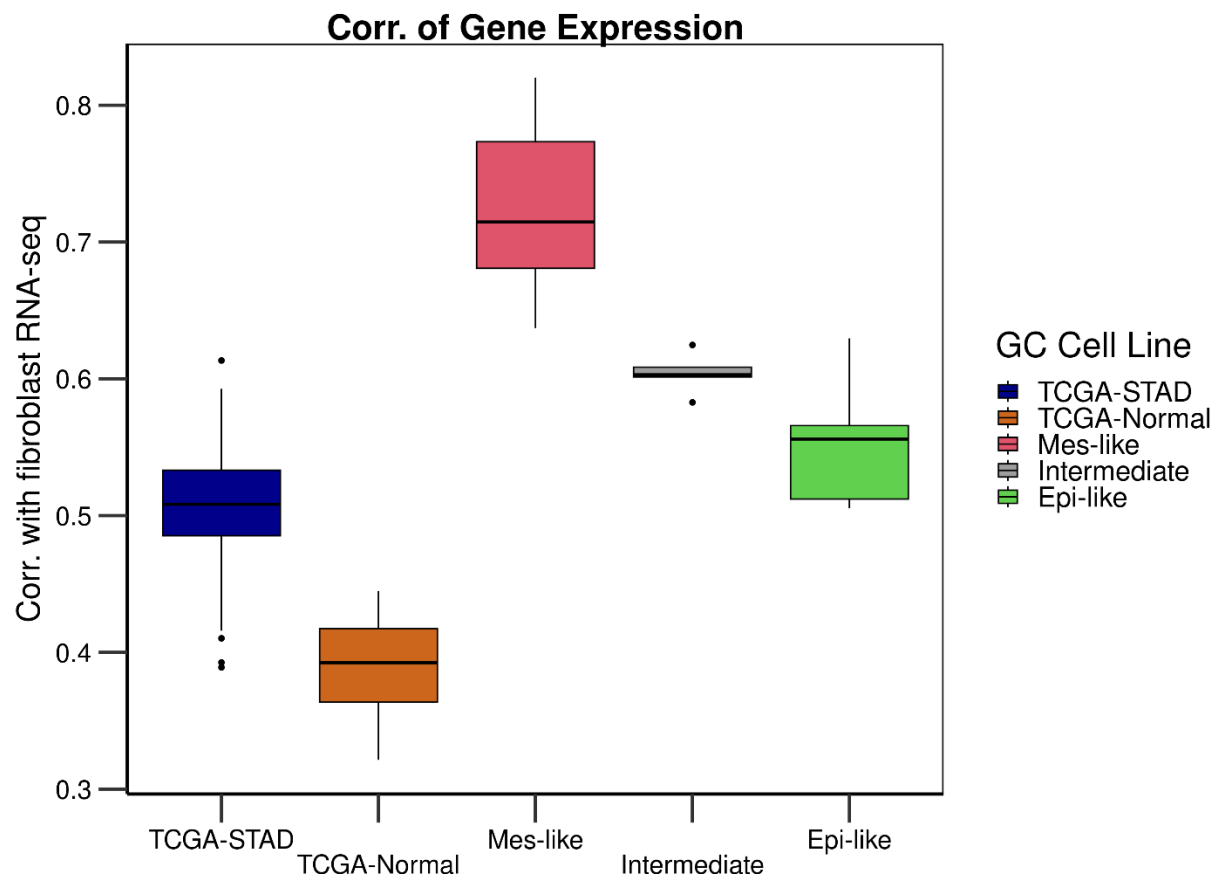

*t*-test p-values:

- (Mes vs. Epi) =  $9.9 \times 10^{-4}$
- (TCGA-STAD vs. TCGA-Normal) =  $1.2 \times 10^{-10}$

Supplemental Fig. S17) Correlation of RNA-seq for GC Cell Lines and TCGA-STAD with ENCODE Primary Stomach

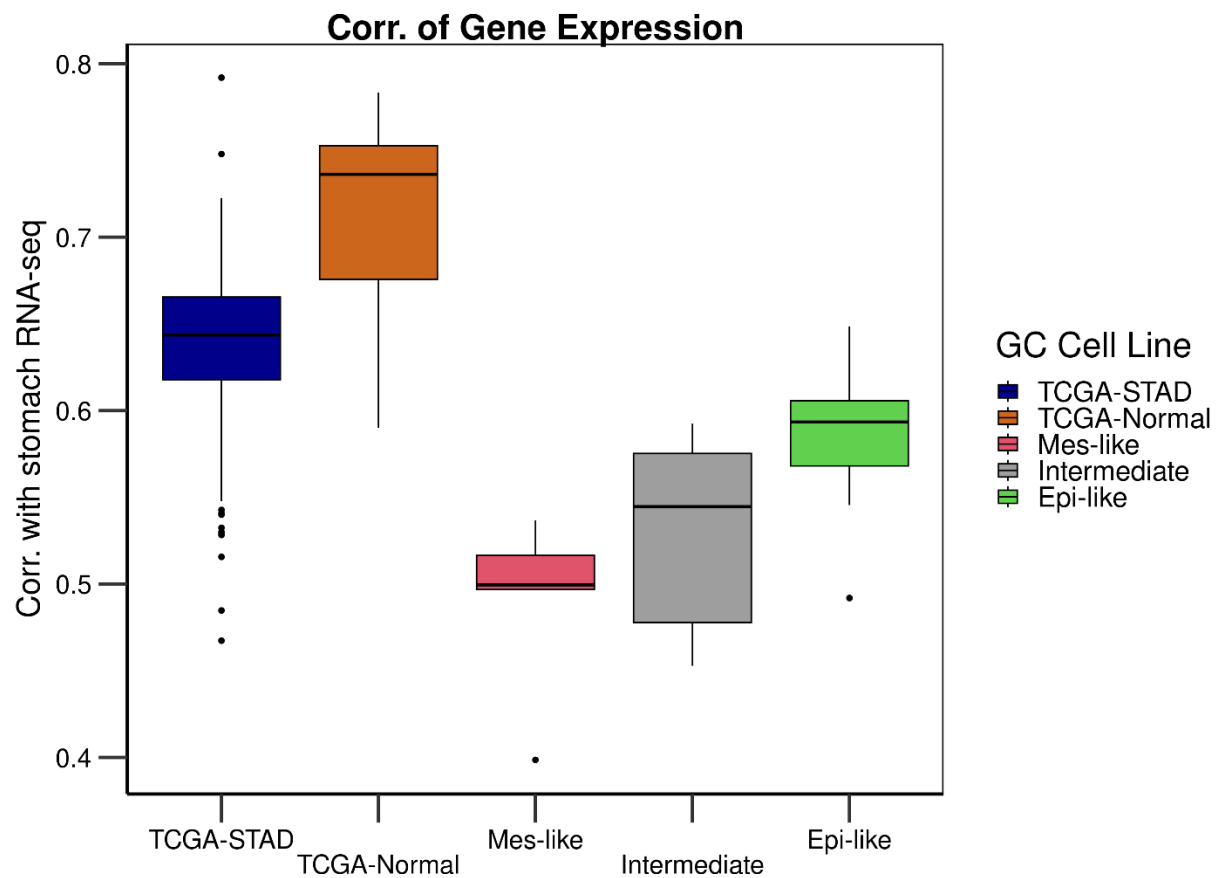

*t*-test p-values:

- (Mes vs. Epi) = 0.0032
- (TCGA-STAD vs. TCGA-Normal) =  $9.3 \times 10^{-5}$



Supplemental Fig. S18) Correlation of Chromatin Accessibility for GC Cell Lines and TCGA-STAD with ENCODE Primary Lung Fibroblast

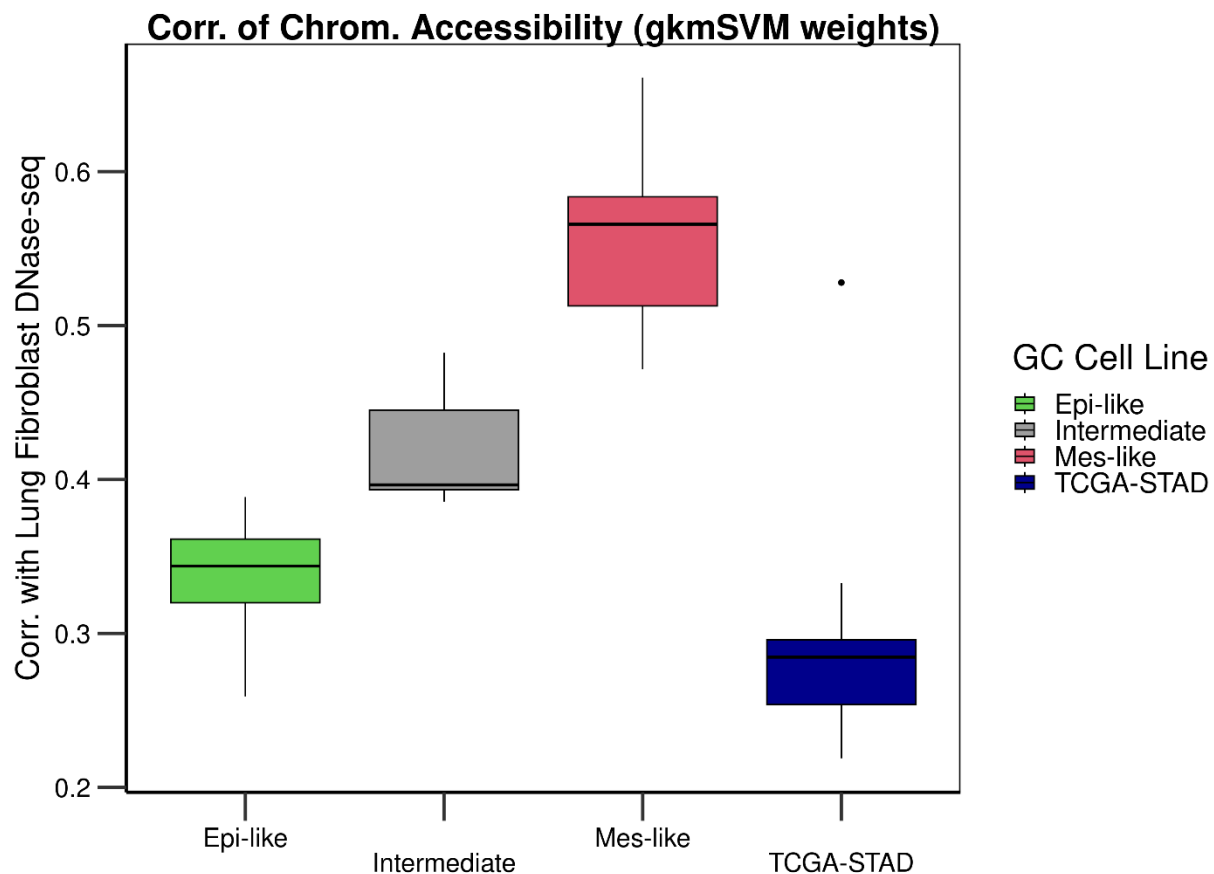

Chromatin accessibility is measured by ATAC-seq in the GC cell lines and with DNase-seq in the ENCODE healthy primary tissue. For each sample, gkm-SVM models were trained on distal enhancer DNA regions (peak length = 300). The gkm-SVM output is a weight vector for  $(4^{11} / 2)$   $k$ -mers ( $k = 11$ ) which shows the overrepresentation and underrepresentation of that particular  $k$ -mer (transcription factor binding site) in the ATAC-seq or DNase-seq. Correlation of these weight vectors were used to measure similarity in the regulatory landscape and chromatin accessibility of different samples.

$t$ -test p-values:

- (Mes vs. Epi) = 0.0014
- (TCGA-STAD vs. Epi) = 0.2396

Supplemental Fig. S19) Correlation of Chromatin Accessibility for GC Cell Lines and TCGA-STAD with ENCODE Primary Stomach

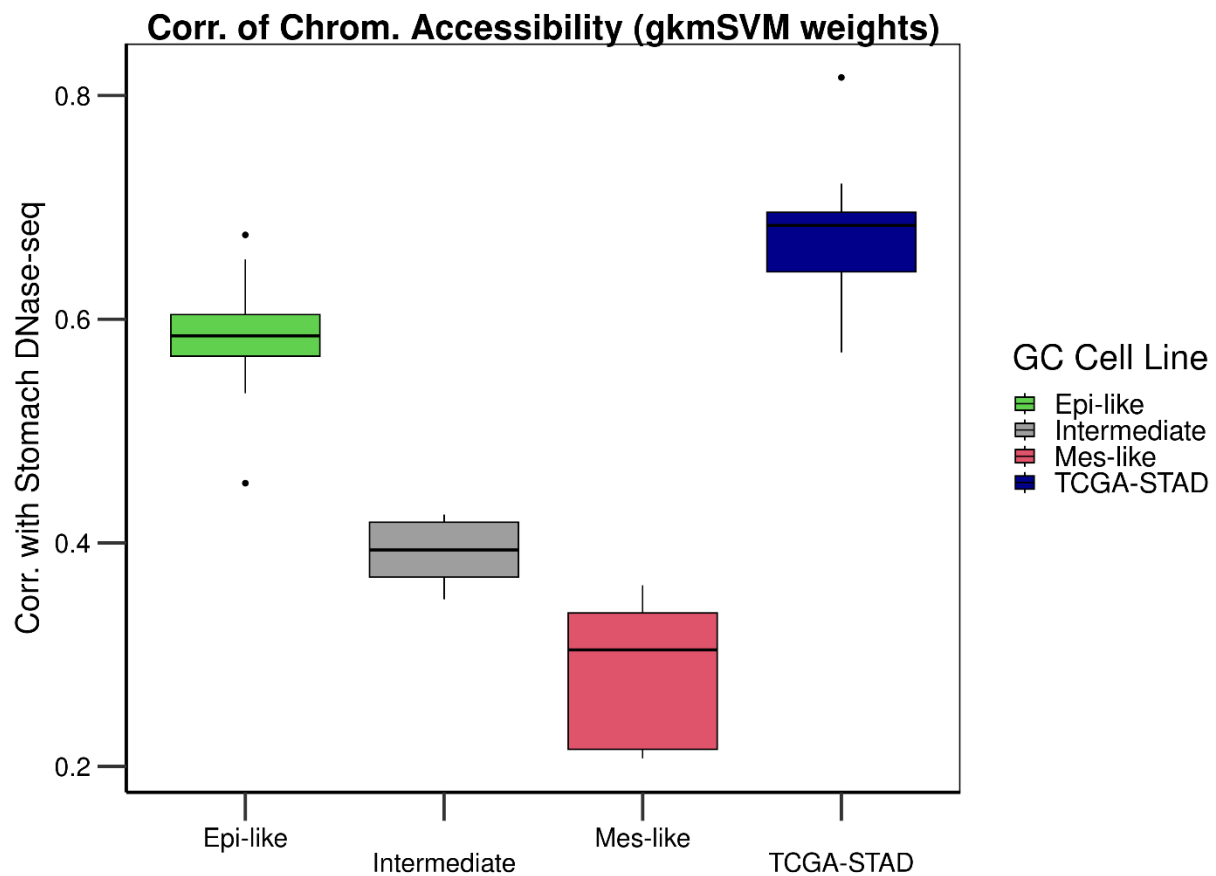

Correlation of gkm-SVM *k*-mer weight vectors was used to measure similarity in the regulatory landscape and chromatin accessibility of different samples.

*t*-test p-values:

- (Mes vs. Epi) = 0.00018
- (TCGA-STAD vs. Epi) = 0.0039

Supplemental Fig. S20) UMAP of scRNA-seq of GC Tumors and Normal Adjacent Tissue

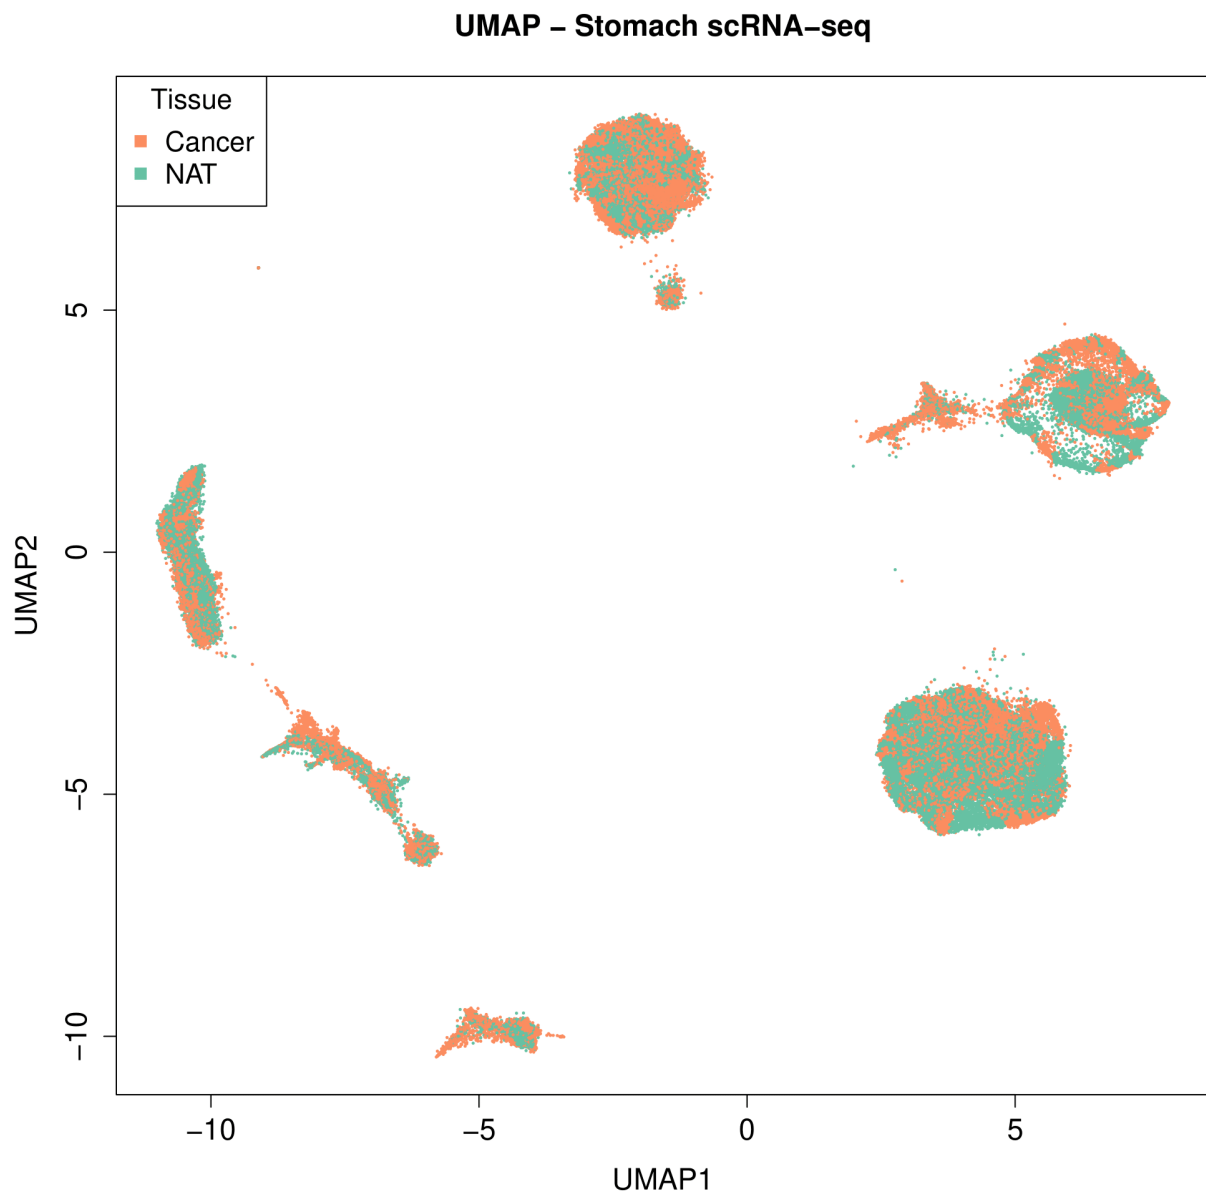

NAT: Normal Adjacent Tissue

Cancer and NAT cells spread uniformly across the 6 single-cell groups detected by clustering over UMAP.

Supplemental Fig. S21) Correlation of COL1A1 Enhancer (*E1*) Accessibility and *COL1A1* Gene Expression

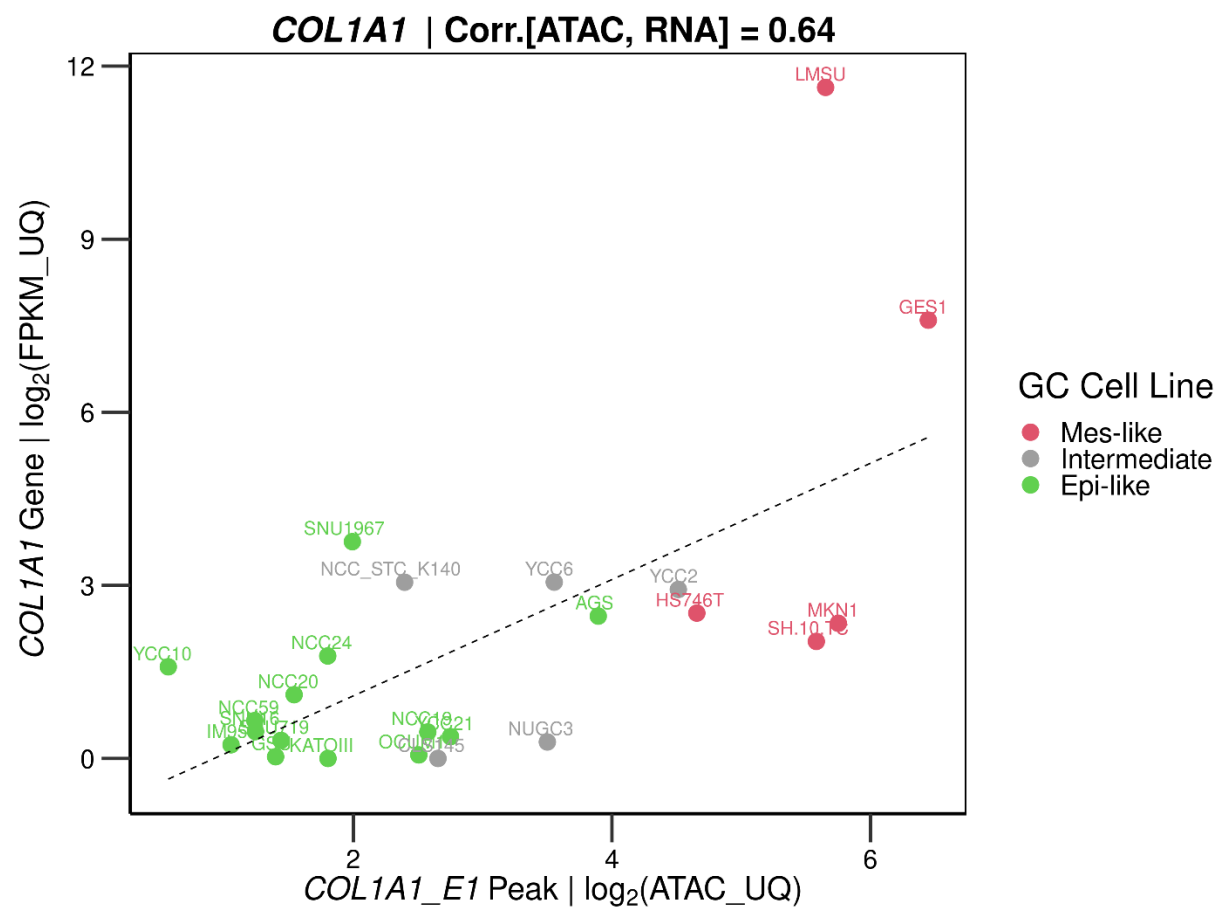

Pearson's correlation of [*COL1A1* RNA, *COL1A1\_E1* ATAC] signals. ATAC-seq and RNA-seq values are upper-quartile normalized.

Supplemental Fig. S22) Correlation of COL1A1 Enhancer (*E2*) Accessibility and *COL1A1* Gene Expression

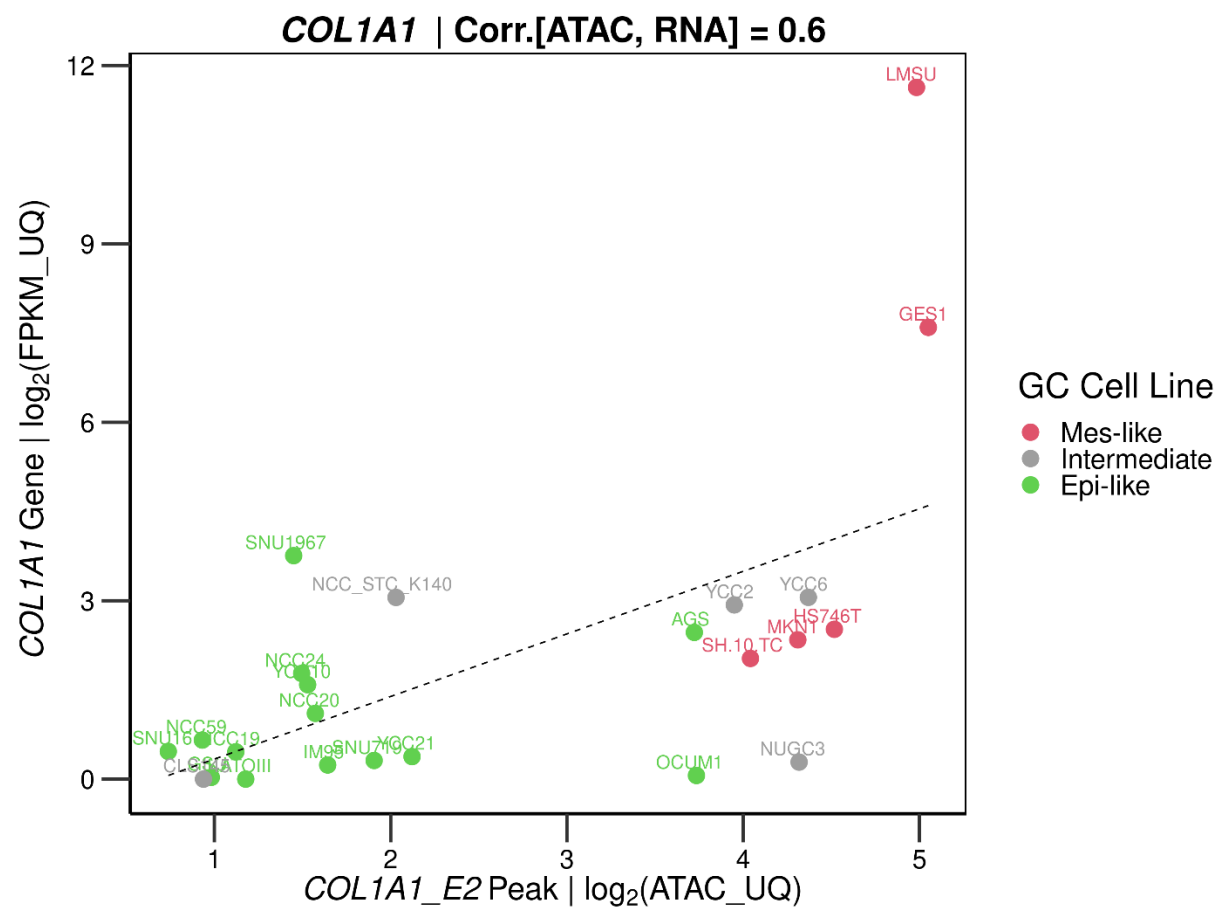

Pearson's correlation of [*COL1A1* RNA, *COL1A1\_E2* ATAC] signals. ATAC-seq and RNA-seq values are upper-quartile normalized.



Supplemental Fig. S23) Correlation of FGF5 Enhancer (*E*) Accessibility and *FGF5* Gene Expression

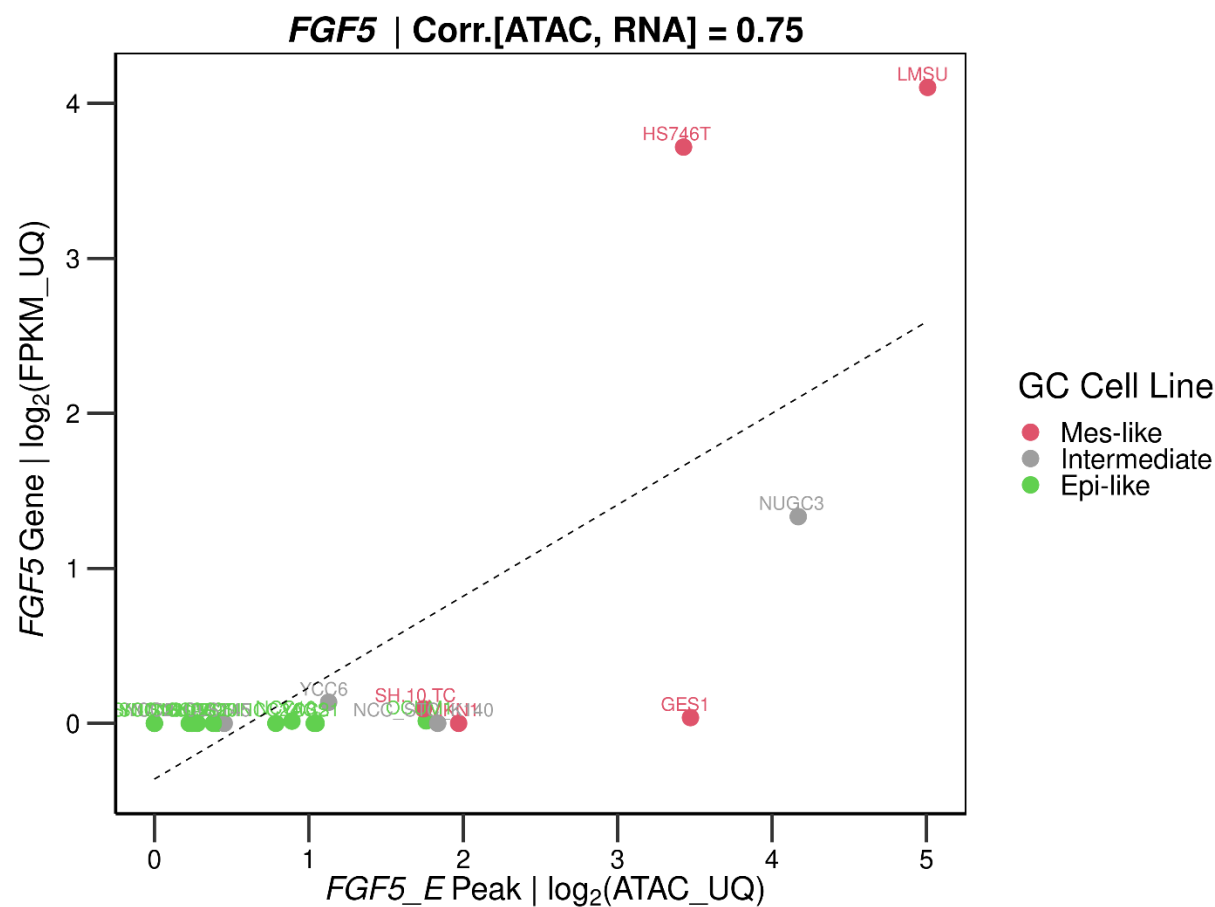

Pearson's correlation of [*FGF5* RNA, *FGF5\_E* ATAC] signals. ATAC-seq and RNA-seq values are upper-quartile normalized.

Supplemental Fig. S24) ROC Curves – GC cell lines VS. random GC-matched Genomic Regions

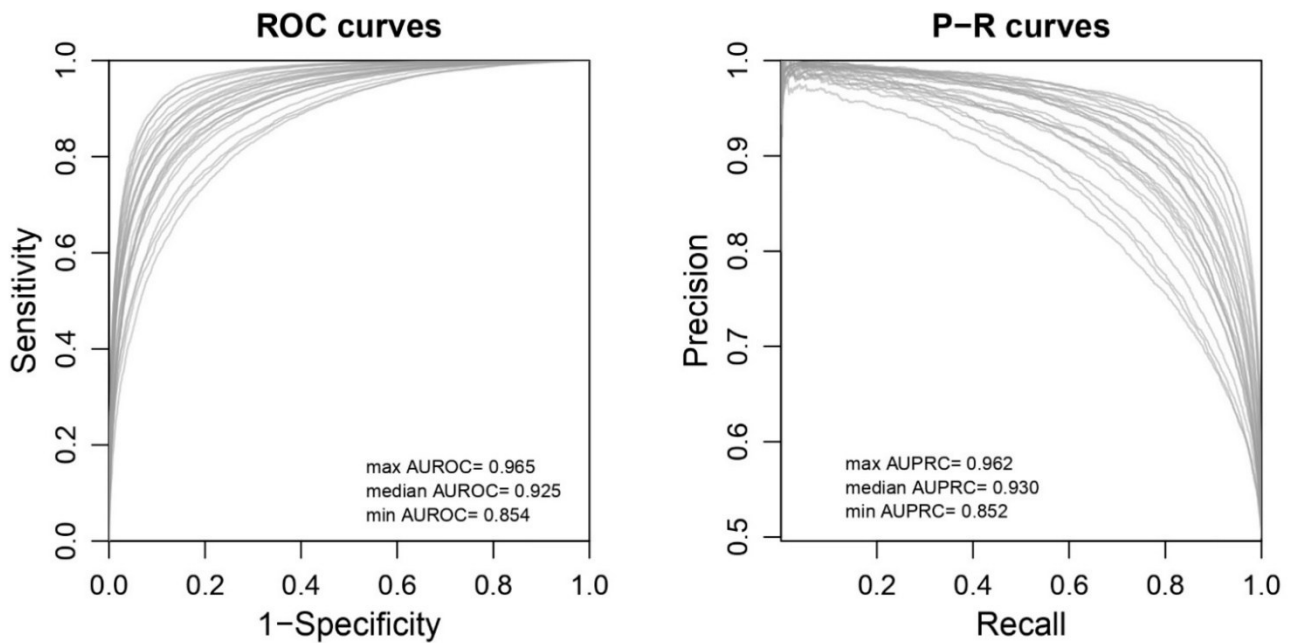

gkm-SVM models were trained on the top10k distal ATAC peaks of each cell line (n=25) vs. 10k random GC-matched genomic regions

Peak length = 300bp

Supplemental Fig. S25) ATAC-seq Signal of Mes vs. Epi Peaks in TCGA-STAD

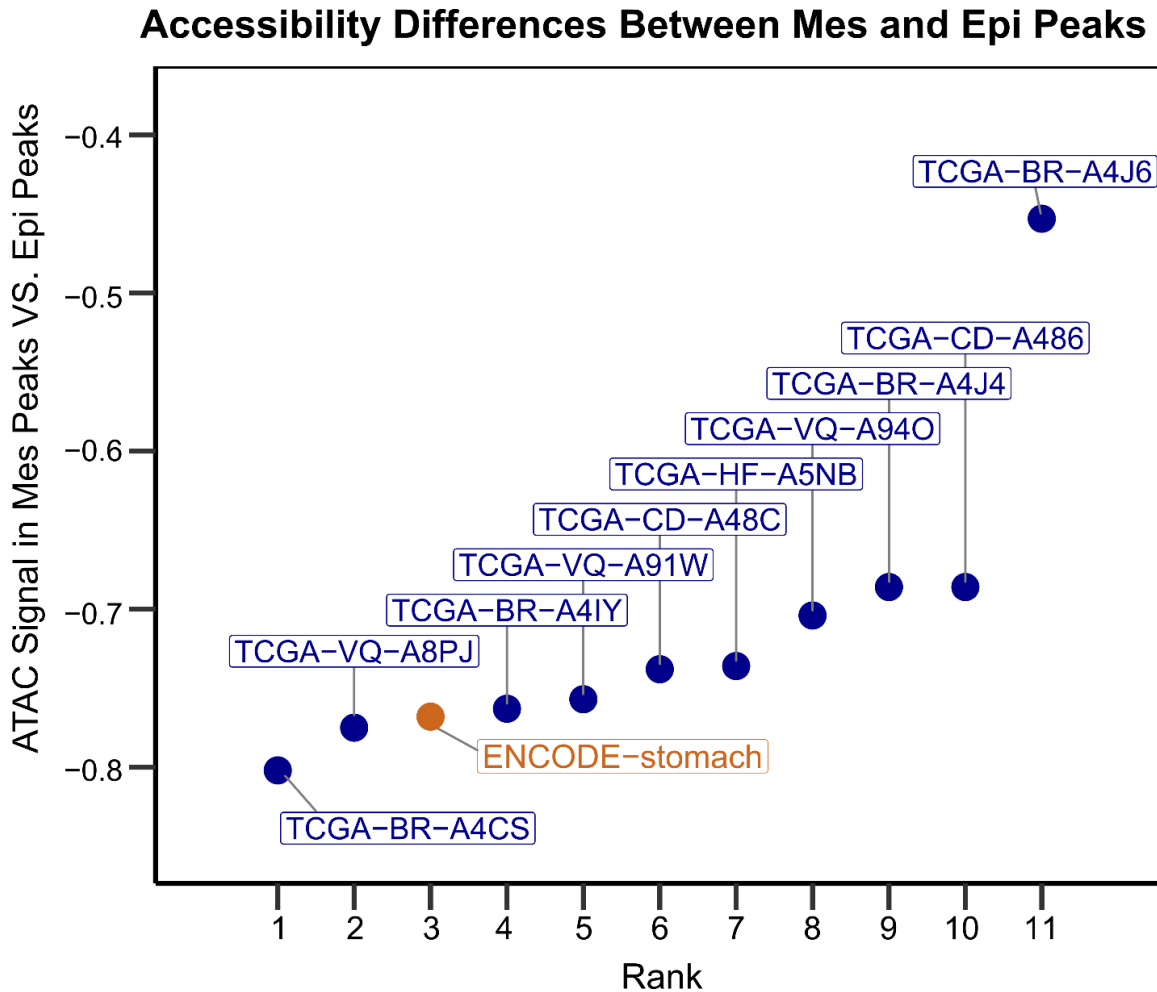

The Y-axis shows the ATAC signal values calculated over the 2000 Mes-high and 2000 Epi-high peaks as follows:  $(\text{Mes} - \text{Epi}) / (\text{Mes} + \text{Epi})$ , which is between  $[-1, +1]$ .

Supplemental Fig. S26) Number of Overlaps between Top TCGA-STAD ATAC Peaks and Mes-high Peaks

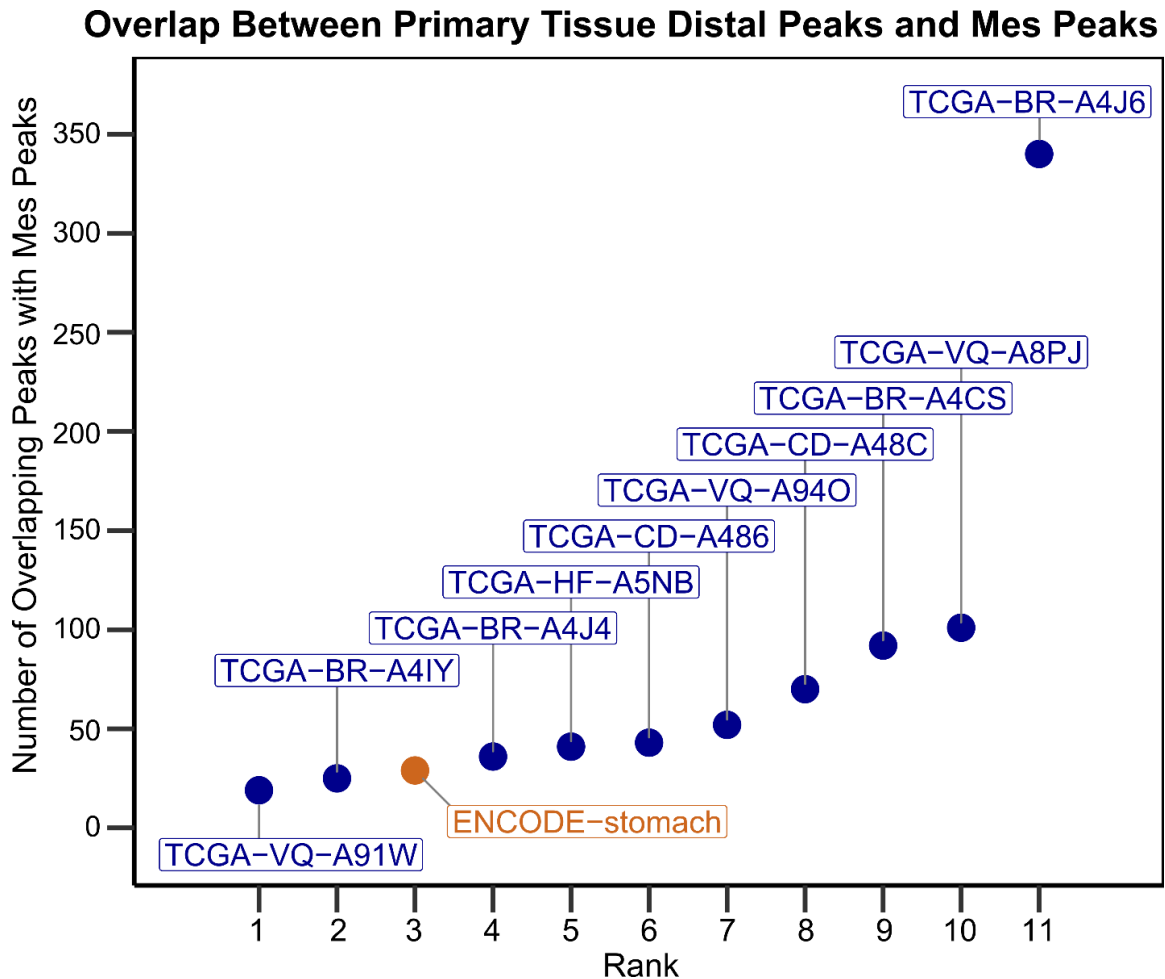

Y-axis shows the number of overlapping peaks between the top ATAC peaks in TCGA-STAD samples and the 2000 Mes-high peaks.

Supplemental Fig. S27) ROC Curves – Pairs of GC Cell Lines Trained Against Each Other

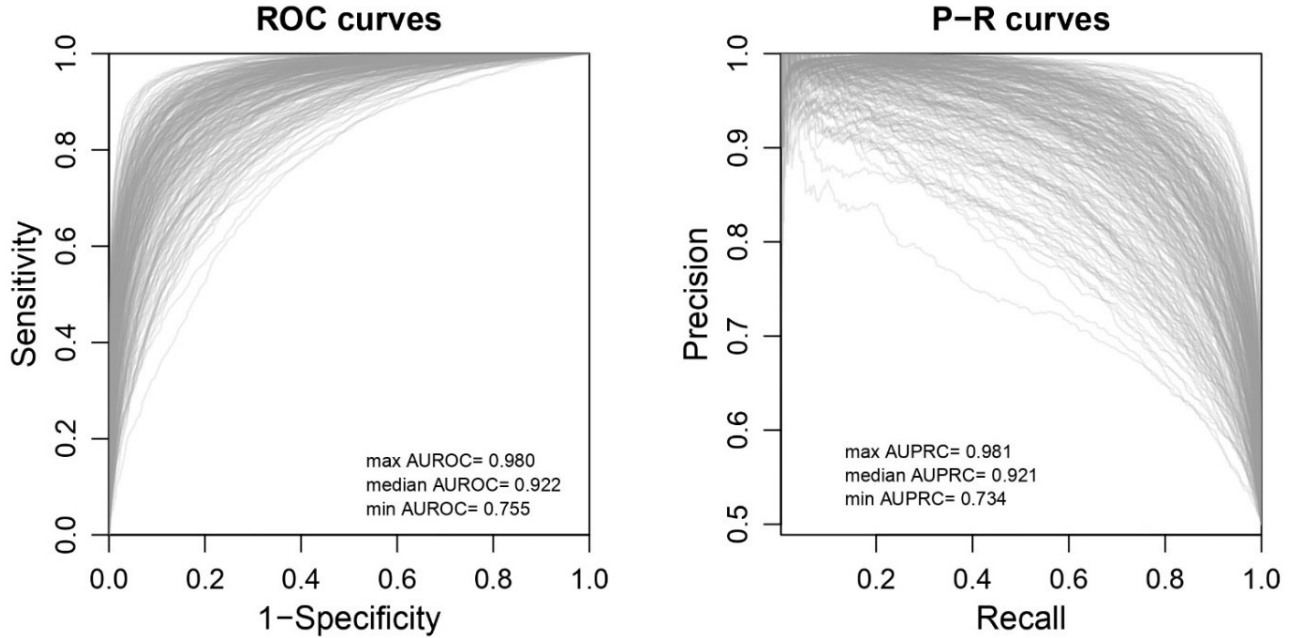

gkm-SVM models were trained on the most differentially accessible distal ATAC peaks ( $n=2000$  positive peaks and  $n=2000$  negative peaks) of each pair of GC cell lines ( $n=25$ ) vs. all other GC cell lines ( $300 \text{ pairs} = (25 * 24) / 2$ )

Peak length = 300bp

Supplemental Fig. S28) PCA of ATAC-seq | TF Motif Activity

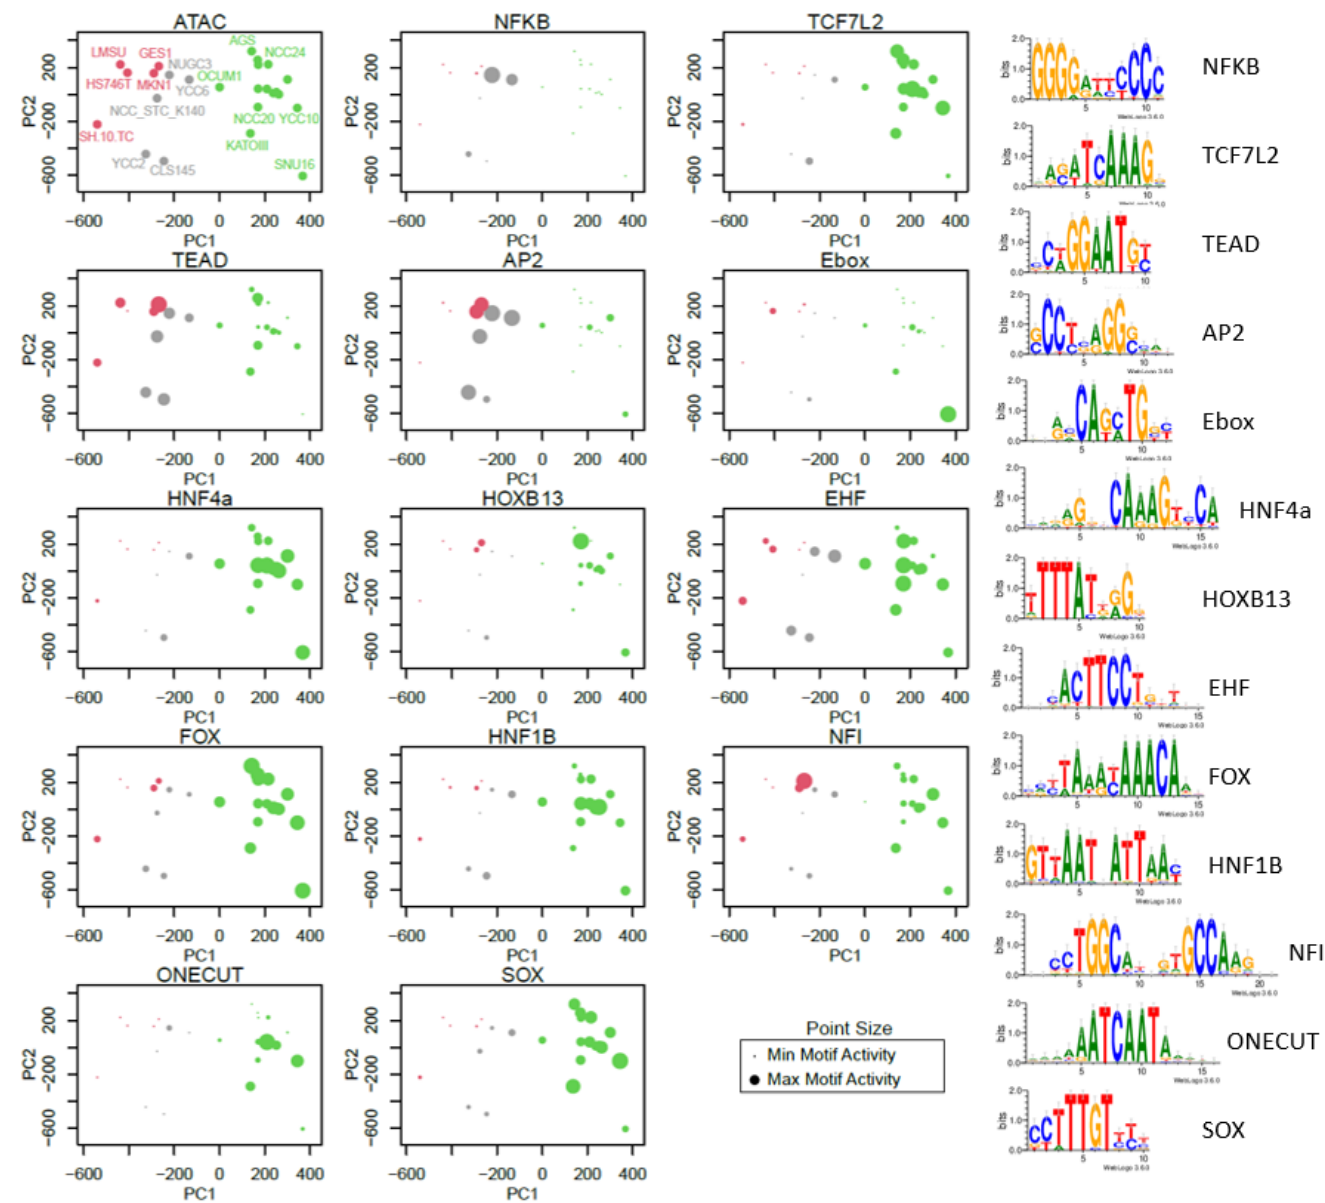

gkm-SVM inferred activity (dot size) of TFs not shown in Fig 1E, across all samples.
