# Supplementary material for: Machine learning identifies activation of RUNX/AP-1 as drivers of mesenchymal and fibrotic regulatory programs in gastric cancer
Source: HighWire-hosted journal article supplement (doi:10.1101/gr.278565.123), 2024-05-01
Supplement: Supplemental_Table_S1.xlsx [file Supplemental_Table_S1.xlsx]

## Sheet: 1) DEG-Mes VS Epi Cell Lines
GENE_ID	GENE_SYMBOL	logFC	logCPM	LR	PValue	FDR
ENSG00000163586	FABP1	-15.9774	8.49466	16.3949	5.14221e-05	0.000984242
ENSG00000096088	PGC	-14.829	8.62638	19.9662	7.8824e-06	0.000221255
ENSG00000007306	CEACAM7	-14.3516	6.87609	15.0696	0.000103621	0.00166264
ENSG00000115386	REG1A	-14.2299	9.18218	10.5828	0.00114143	0.0104083
ENSG00000090382	LYZ	-13.8991	12.9841	38.0191	7.00567e-10	9.78372e-08
ENSG00000164692	COL1A2	13.5472	10.7354	29.5543	5.43731e-08	3.81938e-06
ENSG00000112818	MEP1A	-13.4965	6.01681	15.3198	9.07586e-05	0.00150097
ENSG00000233041	PHGR1	-13.3419	7.96188	18.5576	1.64849e-05	0.000402074
ENSG00000169903	TM4SF4	-13.0682	7.68673	11.0701	0.000877311	0.00856268
ENSG00000134193	REG4	-12.7999	10.1455	24.2671	8.38603e-07	3.47483e-05
ENSG00000171564	FGB	-12.428	4.95512	9.04506	0.00263406	0.0200514
ENSG00000118271	TTR	-12.4234	4.94675	10.82	0.0010041	0.00942602
ENSG00000198643	FAM3D	-12.3227	6.24745	18.541	1.66293e-05	0.000404538
ENSG00000126860	EVI2A	12.2532	6.88826	35.8597	2.12046e-09	2.39265e-07
ENSG00000130988	RGN	-12.2486	6.76759	11.0665	0.000878996	0.00856781
ENSG00000166391	MOGAT2	-12.1612	4.68751	17.8355	2.40843e-05	0.000543796
ENSG00000263429	TMEM238L	-11.981	4.50853	22.9352	1.67557e-06	6.27618e-05
ENSG00000102837	OLFM4	-11.9642	7.5461	8.05102	0.0045478	0.0302438
ENSG00000164283	ESM1	11.8129	5.30652	38.1823	6.44327e-10	9.21207e-08
ENSG00000172461	FUT9	-11.7599	4.45837	17.9845	2.22706e-05	0.000512044
ENSG00000198883	PNMA5	11.7204	7.30066	37.0552	1.1483e-09	1.47796e-07
ENSG00000169876	MUC17	-11.7038	7.26925	18.4648	1.73067e-05	0.00041654
ENSG00000198788	MUC2	-11.6664	8.21354	11.7929	0.000594556	0.00636293
ENSG00000113722	CDX1	-11.6602	6.39009	10.1626	0.00143318	0.0123286
ENSG00000125144	MT1G	-11.6299	4.23694	13.4257	0.000248204	0.00325717
ENSG00000176153	GPX2	-11.5891	10.4955	37.7271	8.1366e-10	1.10893e-07
ENSG00000168685	IL7R	11.5668	6.60765	99.8148	1.67337e-23	9.02464e-20
ENSG00000189334	S100A14	-11.5502	9.94495	44.5852	2.43528e-11	6.71899e-09
ENSG00000204983	PRSS1	-11.5246	6.05305	15.2515	9.41012e-05	0.00154271
ENSG00000160180	TFF3	-11.3835	7.56717	16.8592	4.02572e-05	0.000814651
ENSG00000079112	CDH17	-11.261	9.76145	37.0228	1.16756e-09	1.47796e-07
ENSG00000241186	TDGF1	-11.2412	3.77315	16.1419	5.87692e-05	0.00108273
ENSG00000175329	ISX	-11.1295	3.66398	17.1889	3.38414e-05	0.000722291
ENSG00000137648	TMPRSS4	-11.1085	9.1783	39.5676	3.16897e-10	5.12106e-08
ENSG00000171747	LGALS4	-10.8665	10.3413	30.6693	3.05966e-08	2.40353e-06
ENSG00000112494	UNC93A	-10.8563	5.38796	12.289	0.000455631	0.00522199
ENSG00000175538	KCNE3	-10.7676	7.9428	44.2756	2.85255e-11	7.50421e-09
ENSG00000108602	ALDH3A1	-10.7454	10.6353	17.5403	2.81285e-05	0.00062268
ENSG00000188257	PLA2G2A	-10.7382	6.28942	19.5178	9.9664e-06	0.000267156
ENSG00000151892	GFRA1	10.7302	5.80151	36.1171	1.85812e-09	2.16692e-07
ENSG00000180745	CLRN3	-10.7039	5.72438	28.7313	8.31477e-08	5.35536e-06
ENSG00000131771	PPP1R1B	-10.6939	8.89935	21.8565	2.93822e-06	9.98114e-05
ENSG00000148702	HABP2	-10.5704	4.82095	12.9938	0.000312524	0.00385947
ENSG00000168903	BTNL3	-10.5292	3.06382	12.7594	0.00035422	0.00429008
ENSG00000162896	PIGR	-10.4911	7.42204	12.8701	0.00033388	0.0040875
ENSG00000109205	ODAM	-10.4752	7.59744	13.7614	0.000207556	0.00287463
ENSG00000170549	IRX1	10.4587	1.98728	18.5931	1.61804e-05	0.000397896
ENSG00000163631	ALB	-10.4548	3.00052	10.1865	0.00141475	0.0121887
ENSG00000089472	HEPH	-10.4469	7.71978	21.4591	3.61465e-06	0.000118863
ENSG00000114113	RBP2	-10.4454	4.24024	10.436	0.00123585	0.0110514
ENSG00000147257	GPC3	-10.4127	8.18547	8.92794	0.00280842	0.0210808
ENSG00000132698	RAB25	-10.3621	8.35739	65.1493	6.94319e-16	8.72681e-13
ENSG00000103460	TOX3	-10.3569	5.71942	35.6502	2.36126e-09	2.56832e-07
ENSG00000163359	COL6A3	10.3518	10.4988	41.1299	1.4244e-10	2.82681e-08
ENSG00000127831	VIL1	-10.3377	9.56498	36.3563	1.64345e-09	1.93653e-07
ENSG00000134398	ERN2	-10.3195	7.11328	23.8572	1.03753e-06	4.17671e-05
ENSG00000148848	ADAM12	10.3072	5.42834	68.4456	1.30429e-16	2.45902e-13
ENSG00000130701	RBBP8NL	-10.2968	5.00903	30.5142	3.31436e-08	2.56795e-06
ENSG00000113303	BTNL8	-10.285	4.11868	17.4171	3.00118e-05	0.000655392
ENSG00000169562	GJB1	-10.2735	5.88305	22.5424	2.05561e-06	7.40544e-05
ENSG00000100665	SERPINA4	-10.2724	2.84411	13.1127	0.000293298	0.00368643
ENSG00000123572	NRK	10.2556	4.68159	13.7898	0.000204443	0.0028446
ENSG00000135773	CAPN9	-10.2267	4.77366	19.2712	1.13401e-05	0.000295575
ENSG00000165376	CLDN2	-10.2252	8.11198	19.7501	8.82574e-06	0.000242465
ENSG00000182107	TMEM30B	-10.2054	7.8909	45.7975	1.31128e-11	3.90347e-09
ENSG00000101951	PAGE4	-10.1839	4.69638	7.80358	0.0052143	0.0333244
ENSG00000118322	ATP10B	-10.1771	6.7159	22.6963	1.8973e-06	6.92332e-05
ENSG00000172016	REG3A	-10.1588	2.7109	7.4101	0.00648589	0.0389429
ENSG00000116132	PRRX1	10.1507	3.84375	33.0773	8.85683e-09	8.3154e-07
ENSG00000142273	CBLC	-10.1224	6.95785	128.458	8.90925e-30	1.00781e-25
ENSG00000052344	PRSS8	-10.0931	8.77998	48.4536	3.3819e-12	1.22713e-09
ENSG00000203697	CAPN8	-10.0703	6.3586	29.6836	5.08626e-08	3.68819e-06
ENSG00000086548	CEACAM6	-10.0572	10.4413	24.8439	6.21641e-07	2.74688e-05
ENSG00000134240	HMGCS2	-10.0404	7.64669	19.0903	1.24679e-05	0.000320376
ENSG00000248144	ADH1C	-10.0272	6.0522	11.8142	0.000587794	0.00630248
ENSG00000165929	TC2N	-10.0068	7.84247	99.106	2.39338e-23	9.02464e-20
ENSG00000083307	GRHL2	-10.0008	7.78003	68.0798	1.5701e-16	2.53729e-13
ENSG00000110852	CLEC2B	9.9386	4.25037	65.5163	5.76359e-16	8.14971e-13
ENSG00000238269	PAGE2B	-9.92095	4.54883	7.58213	0.00589497	0.0365391
ENSG00000101938	CHRDL1	9.92007	4.19967	12.6646	0.000372649	0.00447021
ENSG00000204644	ZFP57	9.90064	3.94041	25.8772	3.63832e-07	1.75135e-05
ENSG00000165092	ALDH1A1	-9.87464	10.4698	19.012	1.299e-05	0.000330953
ENSG00000009765	IYD	-9.87256	5.17085	29.2364	6.40651e-08	4.28819e-06
ENSG00000105388	CEACAM5	-9.86578	10.1811	16.3249	5.33596e-05	0.00100769
ENSG00000151702	FLI1	9.74393	4.07544	28.5509	9.12678e-08	5.67265e-06
ENSG00000036473	OTC	-9.73637	2.29824	10.0676	0.001509	0.0127577
ENSG00000162882	HAAO	-9.7288	4.30093	13.4746	0.000241816	0.00319186
ENSG00000243955	GSTA1	-9.69086	5.14926	10.3051	0.00132665	0.01171
ENSG00000187908	DMBT1	-9.68964	9.20842	8.64983	0.00327092	0.0235477
ENSG00000132437	DDC	-9.65158	6.8665	25.5593	4.29e-07	2.01363e-05
ENSG00000106541	AGR2	-9.62989	11.4993	26.9421	2.0964e-07	1.13466e-05
ENSG00000106384	MOGAT3	-9.593	4.19785	18.2805	1.90652e-05	0.000452129
ENSG00000165841	CYP2C19	-9.57606	2.14993	16.8072	4.13757e-05	0.000832517
ENSG00000197408	CYP2B6	-9.57359	4.9125	16.0545	6.15442e-05	0.00111991
ENSG00000109193	SULT1E1	-9.54744	4.72555	16.0684	6.10946e-05	0.00111468
ENSG00000142484	TM4SF5	-9.53696	5.39463	18.1412	2.0511e-05	0.000482371
ENSG00000070526	ST6GALNAC1	-9.53167	6.70956	21.5247	3.49301e-06	0.000115535
ENSG00000168350	DEGS2	-9.52815	6.06393	30.9833	2.60253e-08	2.08793e-06
ENSG00000100170	SLC5A1	-9.52436	5.74035	16.8771	3.988e-05	0.000811445
ENSG00000073737	DHRS9	-9.46441	6.03496	12.8063	0.000345458	0.00419744
ENSG00000167757	KLK11	-9.46172	5.10626	13.0434	0.00030436	0.00379176
ENSG00000171431	KRT20	-9.43938	9.07256	10.0915	0.00148951	0.0126591
ENSG00000167741	GGT6	-9.43278	4.4979	18.3572	1.83123e-05	0.000437946
ENSG00000168955	TM4SF20	-9.42826	4.81922	11.1387	0.000845429	0.00833057
ENSG00000144681	STAC	9.42047	4.17037	25.1749	5.23588e-07	2.38824e-05
ENSG00000066468	FGFR2	-9.40818	11.7512	16.6187	4.56992e-05	0.000905341
ENSG00000175311	ANKS4B	-9.40715	5.77288	20.1019	7.34221e-06	0.000209207
ENSG00000172818	OVOL1	-9.40229	6.6045	48.4759	3.34376e-12	1.22713e-09
ENSG00000138675	FGF5	9.36215	4.20007	15.4818	8.33044e-05	0.00140438
ENSG00000005981	ASB4	-9.34726	5.11555	7.61564	0.00578643	0.0360839
ENSG00000183287	CCBE1	9.34515	5.25869	49.1498	2.37137e-12	9.93514e-10
ENSG00000134184	GSTM1	-9.34016	5.46701	14.5189	0.000138757	0.00210332
ENSG00000169594	BNC1	9.32256	4.62883	21.6271	3.31138e-06	0.000110824
ENSG00000196260	SFTA2	-9.31955	3.60672	17.6041	2.71997e-05	0.0006033
ENSG00000186526	CYP4F8	-9.31767	1.9183	9.39407	0.00217688	0.0171738
ENSG00000136155	SCEL	-9.30853	6.20883	22.1574	2.51186e-06	8.76979e-05
ENSG00000158874	APOA2	-9.30587	4.43057	8.88594	0.00287375	0.0214715
ENSG00000111701	APOBEC1	-9.30029	1.91411	14.8303	0.000117628	0.00183532
ENSG00000104537	ANXA13	-9.29969	6.93027	15.6093	7.78727e-05	0.00132466
ENSG00000174502	SLC26A9	-9.26742	6.94991	15.0278	0.000105941	0.00169505
ENSG00000136872	ALDOB	-9.2441	3.07888	13.8767	0.000195207	0.00273115
ENSG00000169347	GP2	-9.19382	1.7823	9.57967	0.00196743	0.0158629
ENSG00000162989	KCNJ3	-9.18707	3.21238	7.79099	0.00525073	0.0335193
ENSG00000196188	CTSE	-9.16435	9.54192	25.3469	4.78924e-07	2.21126e-05
ENSG00000143196	DPT	9.15728	1.91577	15.9353	6.55453e-05	0.00117504
ENSG00000180287	PLD5	9.15432	1.45938	13.1663	0.000285031	0.00361871
ENSG00000185985	SLITRK2	9.15409	0.829727	21.9029	2.86794e-06	9.79397e-05
ENSG00000162493	PDPN	9.1091	1.70315	15.827	6.94039e-05	0.00121721
ENSG00000144583	MARCHF4	9.09853	5.43424	32.3107	1.31385e-08	1.17026e-06
ENSG00000106366	SERPINE1	9.05428	10.1812	62.8055	2.28164e-15	2.58099e-12
ENSG00000204616	TRIM31	-9.03109	7.85656	19.9426	7.98028e-06	0.000222896
ENSG00000139540	SLC39A5	-9.00472	5.807	18.6352	1.5827e-05	0.000390906
ENSG00000122420	PTGFR	8.97288	4.24686	20.8589	4.94393e-06	0.00015156
ENSG00000163751	CPA3	8.96457	1.74801	34.4935	4.27678e-09	4.39808e-07
ENSG00000184454	NCMAP	-8.95039	3.3356	13.4812	0.00024096	0.00318799
ENSG00000166922	SCG5	8.90204	6.96545	60.2429	8.38442e-15	6.77461e-12
ENSG00000204385	SLC44A4	-8.89775	7.09909	25.1407	5.32954e-07	2.42119e-05
ENSG00000198610	AKR1C4	-8.88757	1.51717	16.6014	4.61163e-05	0.000910415
ENSG00000146039	SLC17A4	-8.88306	1.47675	13.1313	0.000290404	0.00367045
ENSG00000167183	PRR15L	-8.86467	7.2632	39.1324	3.96019e-10	6.13666e-08
ENSG00000179178	TMEM125	-8.83668	5.94743	62.2471	3.02955e-15	3.11548e-12
ENSG00000170608	FOXA3	-8.82957	6.01626	39.623	3.08027e-10	5.05091e-08
ENSG00000019102	VSIG2	-8.82042	6.90356	24.5934	7.07933e-07	3.08005e-05
ENSG00000135373	EHF	-8.79955	8.71352	38.48	5.53166e-10	8.1265e-08
ENSG00000005001	PRSS22	-8.79258	6.90235	35.8091	2.17624e-09	2.41349e-07
ENSG00000143167	GPA33	-8.783	7.76092	13.3593	0.000257141	0.00334727
ENSG00000042980	ADAM28	-8.78291	4.0661	16.4077	5.1078e-05	0.000979312
ENSG00000166959	MS4A8	-8.77219	1.39275	10.3451	0.00129819	0.0115087
ENSG00000196684	HSH2D	-8.77052	4.68221	42.6437	6.56758e-11	1.4287e-08
ENSG00000171759	PAH	-8.76712	2.67818	9.48044	0.00207675	0.0165438
ENSG00000211448	DIO2	8.76127	5.83746	43.2556	4.80351e-11	1.10892e-08
ENSG00000070019	GUCY2C	-8.75485	5.95755	17.9354	2.28525e-05	0.000523295
ENSG00000178860	MSC	8.73639	4.15578	9.39398	0.00217699	0.0171738
ENSG00000104413	ESRP1	-8.7198	9.28454	60.9542	5.84175e-15	5.50683e-12
ENSG00000134757	DSG3	-8.71782	7.18249	12.4358	0.000421173	0.00492181
ENSG00000171195	MUC7	-8.71639	1.31895	7.65681	0.00565583	0.0355437
ENSG00000197646	PDCD1LG2	8.70944	3.49116	28.1596	1.11711e-07	6.65093e-06
ENSG00000133477	FAM83F	-8.70583	6.25557	57.9193	2.731e-14	1.93081e-11
ENSG00000234906	APOC2	-8.70335	1.31348	7.58799	0.00587584	0.0364805
ENSG00000144837	PLA1A	-8.70212	1.35427	13.3704	0.000255632	0.00333553
ENSG00000069431	ABCC9	8.69539	6.34534	13.6273	0.000222918	0.00301378
ENSG00000113924	HGD	-8.69178	5.3448	22.3954	2.21909e-06	7.94377e-05
ENSG00000130635	COL5A1	8.68245	10.1804	37.0225	1.16776e-09	1.47796e-07
ENSG00000204381	LAYN	8.67035	4.675	28.558	9.09341e-08	5.67265e-06
ENSG00000163993	S100P	-8.66119	10.0328	26.683	2.39725e-07	1.24491e-05
ENSG00000124429	POF1B	-8.64707	8.34547	40.3893	2.08081e-10	3.79767e-08
ENSG00000165828	PRAP1	-8.62869	6.77454	16.0535	6.1579e-05	0.00111991
ENSG00000066405	CLDN18	-8.62781	8.18627	18.3423	1.8456e-05	0.000439727
ENSG00000007952	NOX1	-8.61782	4.58973	17.0813	3.58128e-05	0.000747443
ENSG00000173467	AGR3	-8.61762	6.29585	13.7604	0.000207664	0.00287463
ENSG00000163661	PTX3	8.61346	6.34432	26.5275	2.59816e-07	1.31795e-05
ENSG00000161798	AQP5	-8.61148	5.59823	16.0827	6.06369e-05	0.00111171
ENSG00000162069	BICDL2	-8.61029	6.8057	47.7521	4.83669e-12	1.60919e-09
ENSG00000112246	SIM1	8.602	1.05776	32.2936	1.3255e-08	1.17141e-06
ENSG00000204767	INSYN2B	8.59807	2.71886	23.7423	1.10136e-06	4.40234e-05
ENSG00000145526	CDH18	8.59678	2.80348	23.1331	1.51163e-06	5.77689e-05
ENSG00000124253	PCK1	-8.59441	6.12445	12.57	0.00039198	0.00464887
ENSG00000118137	APOA1	-8.59117	5.02805	11.9383	0.000549904	0.00599279
ENSG00000013297	CLDN11	8.5857	5.63574	48.9591	2.6136e-12	1.05589e-09
ENSG00000162981	LRATD1	-8.58354	6.74275	15.867	6.79519e-05	0.00120312
ENSG00000134259	NGF	8.57301	2.64204	14.2814	0.000157412	0.00230355
ENSG00000015413	DPEP1	-8.55773	5.76094	11.1102	0.000858563	0.0084233
ENSG00000151322	NPAS3	8.55648	2.12804	33.5792	6.84204e-09	6.67217e-07
ENSG00000064270	ATP2C2	-8.55176	6.73059	46.9754	7.18848e-12	2.25878e-09
ENSG00000182747	SLC35D3	-8.54693	4.5649	8.16988	0.00425917	0.028764
ENSG00000162618	ADGRL4	8.53047	1.59731	20.7631	5.19747e-06	0.000156784
ENSG00000109511	ANXA10	-8.52458	7.35579	18.6169	1.59795e-05	0.000393812
ENSG00000095585	BLNK	-8.52267	4.20324	14.4577	0.000143343	0.00215337
ENSG00000150630	VEGFC	8.51854	4.78561	11.9856	0.000536119	0.00588872
ENSG00000151789	ZNF385D	8.51285	-0.264524	21.0857	4.3919e-06	0.000138774
ENSG00000108244	KRT23	-8.50631	9.01617	12.1534	0.000489994	0.00553174
ENSG00000038295	TLL1	8.49546	1.44899	9.60515	0.00194032	0.0157002
ENSG00000165496	RPL10L	8.46879	0.479733	12.5357	0.000399252	0.0047178
ENSG00000019549	SNAI2	8.46103	6.30416	29.9634	4.40285e-08	3.25523e-06
ENSG00000122641	INHBA	8.45736	7.68191	40.4129	2.05582e-10	3.79767e-08
ENSG00000117983	MUC5B	-8.45411	5.61414	15.8608	6.81756e-05	0.00120312
ENSG00000137757	CASP5	-8.44789	1.09459	13.5777	0.000228891	0.00307488
ENSG00000135472	FAIM2	-8.42036	5.09851	8.30934	0.00394417	0.0270239
ENSG00000198758	EPS8L3	-8.40768	7.81147	21.9082	2.86002e-06	9.79397e-05
ENSG00000176293	ZNF135	8.40141	0.235323	21.2897	3.94853e-06	0.000127982
ENSG00000172367	PDZD3	-8.39876	4.53151	19.4125	1.05316e-05	0.000280313
ENSG00000110934	BIN2	-8.37329	1.11272	14.6134	0.000131972	0.00202285
ENSG00000267795	SMIM22	-8.35259	5.84541	40.8035	1.68329e-10	3.283e-08
ENSG00000188993	LRRC66	-8.33394	4.07958	23.6839	1.13528e-06	4.50665e-05
ENSG00000152766	ANKRD22	-8.32964	6.08693	16.0958	6.02165e-05	0.00110579
ENSG00000073067	CYP2W1	-8.30586	6.42005	11.3237	0.000765226	0.00771501
ENSG00000171124	FUT3	-8.30566	6.04165	20.9902	4.61631e-06	0.000144653
ENSG00000172955	ADH6	-8.28946	4.2593	11.783	0.000597726	0.00639081
ENSG00000130545	CRB3	-8.28776	6.26782	69.0994	9.3624e-17	2.11815e-13
ENSG00000175264	CHST1	8.2808	4.27011	16.5199	4.81409e-05	0.000940536
ENSG00000186081	KRT5	8.27567	6.61702	21.7752	3.06531e-06	0.000103817
ENSG00000107242	PIP5K1B	-8.25723	6.42007	31.6549	1.84146e-08	1.55453e-06
ENSG00000157765	SLC34A2	-8.24869	4.55905	8.05857	0.00452888	0.0301534
ENSG00000144852	NR1I2	-8.24598	5.33116	11.3954	0.000736272	0.00753511
ENSG00000091482	SMPX	-8.24359	2.30154	10.1114	0.00147354	0.0125707
ENSG00000186115	CYP4F2	-8.24223	3.47167	12.6818	0.000369238	0.00444343
ENSG00000102010	BMX	-8.24176	0.988078	8.71217	0.00316093	0.0230851
ENSG00000135220	UGT2A3	-8.23501	1.18388	7.24562	0.0071074	0.0417007
ENSG00000114251	WNT5A	8.23184	6.23207	25.208	5.14688e-07	2.36673e-05
ENSG00000160593	JAML	-8.22988	2.44504	15.453	8.4581e-05	0.00142141
ENSG00000188293	IGFL1	-8.21625	3.50546	10.0993	0.00148323	0.0126248
ENSG00000189058	APOD	-8.19708	4.70187	12.451	0.000417773	0.00488921
ENSG00000111344	RASAL1	-8.18432	5.83346	33.069	8.89466e-09	8.3154e-07
ENSG00000152611	CAPSL	8.17995	-0.395606	51.3898	7.57301e-13	3.42664e-10
ENSG00000145103	ILDR1	-8.16305	3.93629	24.1709	8.81541e-07	3.61304e-05
ENSG00000124664	SPDEF	-8.15136	5.38062	20.4579	6.09564e-06	0.000178637
ENSG00000185479	KRT6B	-8.14382	4.00576	10.8939	0.000964806	0.00914827
ENSG00000166143	PPP1R14D	-8.12812	2.76418	17.1136	3.52101e-05	0.000738955
ENSG00000205502	C2CD4B	-8.12591	2.77993	9.29213	0.0023014	0.0179047
ENSG00000198535	C2CD4A	-8.11031	4.84859	18.9005	1.37717e-05	0.000347736
ENSG00000137033	IL33	-8.10737	4.46092	15.361	8.88026e-05	0.00147943
ENSG00000137747	TMPRSS13	-8.09684	4.2778	16.5383	4.76784e-05	0.000934728
ENSG00000178031	ADAMTSL1	8.0698	4.77759	36.9509	1.21141e-09	1.50587e-07
ENSG00000104415	CCN4	8.04267	2.27987	26.184	3.1039e-07	1.51342e-05
ENSG00000188089	PLA2G4E	-8.03705	1.9792	11.2018	0.000817181	0.00809453
ENSG00000162571	TTLL10	-8.03557	0.859479	25.5925	4.21676e-07	1.99378e-05
ENSG00000146904	EPHA1	-8.02601	7.43637	52.3752	4.58483e-13	2.46969e-10
ENSG00000188175	HEPACAM2	-8.02342	4.19401	6.98553	0.00821712	0.0466627
ENSG00000140459	CYP11A1	8.01779	4.15684	31.931	1.59751e-08	1.3756e-06
ENSG00000144476	ACKR3	8.01741	4.65645	37.645	8.48647e-10	1.14284e-07
ENSG00000089356	FXYD3	-7.99988	9.36486	24.2966	8.25861e-07	3.44728e-05
ENSG00000004468	CD38	7.99815	5.1331	36.524	1.50801e-09	1.81475e-07
ENSG00000158786	PLA2G2F	-7.97938	3.12387	12.2468	0.00046605	0.0053306
ENSG00000180777	ANKRD30B	7.95677	1.44196	32.7768	1.03371e-08	9.43006e-07
ENSG00000180061	TMEM150B	-7.94984	2.46841	17.2839	3.21895e-05	0.000694899
ENSG00000017483	SLC38A5	-7.9313	6.97468	16.9166	3.90586e-05	0.00080187
ENSG00000189377	CXCL17	-7.91917	4.96513	9.73773	0.00180523	0.0147763
ENSG00000172260	NEGR1	7.91174	1.07972	54.2107	1.80101e-13	1.01865e-10
ENSG00000162706	CADM3	7.90349	0.963725	15.8513	6.85178e-05	0.0012054
ENSG00000168907	PLA2G4F	-7.90123	4.15507	13.0569	0.000302174	0.00377284
ENSG00000164266	SPINK1	-7.8987	7.44507	8.71205	0.00316114	0.0230851
ENSG00000082175	PGR	7.88263	2.95751	13.9511	0.000187631	0.0026531
ENSG00000111799	COL12A1	7.8785	8.54399	43.9739	3.3278e-11	8.55548e-09
ENSG00000144820	ADGRG7	-7.87654	1.86117	11.5636	0.000672549	0.00702481
ENSG00000066056	TIE1	7.85946	3.86057	29.3047	6.1847e-08	4.1893e-06
ENSG00000114455	HHLA2	-7.84781	3.72018	8.60189	0.00335814	0.0240285
ENSG00000071967	CYBRD1	7.84002	7.10102	31.966	1.56898e-08	1.36526e-06
ENSG00000154133	ROBO4	7.83217	2.61726	35.9112	2.06515e-09	2.36221e-07
ENSG00000159166	LAD1	-7.8286	9.16539	29.5977	5.31682e-08	3.78263e-06
ENSG00000115590	IL1R2	-7.80228	5.54878	19.7966	8.61372e-06	0.000237655
ENSG00000167332	OR51E2	7.80039	-0.864268	23.0493	1.57903e-06	5.93422e-05
ENSG00000151388	ADAMTS12	7.79878	6.48867	24.4996	7.43248e-07	3.19681e-05
ENSG00000180251	SLC9A4	-7.79474	4.8607	14.4146	0.00014666	0.00220028
ENSG00000174358	SLC6A19	-7.77888	5.73406	7.10843	0.00767224	0.0441896
ENSG00000198963	RORB	7.76832	1.49634	14.3482	0.000151921	0.00224939
ENSG00000091513	TF	-7.76095	4.20298	7.87203	0.00502054	0.0325085
ENSG00000154736	ADAMTS5	7.75249	3.17049	8.43251	0.00368572	0.025668
ENSG00000196460	RFX8	7.75205	1.60394	27.4443	1.61681e-07	9.1447e-06
ENSG00000088002	SULT2B1	-7.74968	5.86868	22.0078	2.7154e-06	9.39346e-05
ENSG00000163520	FBLN2	7.73931	6.56744	29.5427	5.46976e-08	3.81938e-06
ENSG00000104321	TRPA1	7.72049	0.934302	17.9203	2.3035e-05	0.000525347
ENSG00000112837	TBX18	7.71967	3.08192	8.52479	0.00350342	0.0247847
ENSG00000173239	LIPM	-7.71656	0.48168	16.3051	5.39194e-05	0.00101656
ENSG00000184956	MUC6	-7.71184	5.95436	13.7631	0.00020737	0.00287463
ENSG00000228278	ORM2	-7.69257	0.40625	10.7335	0.00105211	0.00976334
ENSG00000215262	KCNU1	7.68515	-0.0272693	10.2615	0.00135833	0.0118851
ENSG00000156413	FUT6	-7.68123	3.60758	9.72563	0.00181716	0.0148524
ENSG00000188959	C9orf152	-7.67789	6.82838	30.232	3.83337e-08	2.91028e-06
ENSG00000137251	TINAG	-7.6694	1.60149	7.31032	0.00685599	0.0406685
ENSG00000163568	AIM2	7.65365	2.20433	26.8584	2.18924e-07	1.17927e-05
ENSG00000114248	LRRC31	-7.65148	3.18448	15.3504	8.93034e-05	0.00148559
ENSG00000064787	BCAS1	-7.61149	6.93092	18.6981	1.53139e-05	0.000381564
ENSG00000242715	CCDC169	7.6083	1.01237	20.3204	6.54982e-06	0.000190958
ENSG00000115232	ITGA4	7.59528	3.40946	13.6244	0.000223263	0.00301378
ENSG00000140832	MARVELD3	-7.59484	6.76166	77.4084	1.39026e-18	3.93165e-15
ENSG00000169291	SHE	7.58684	2.19349	17.1395	3.47316e-05	0.000735189
ENSG00000174567	GOLT1A	-7.58607	4.59633	19.3211	1.1048e-05	0.000289966
ENSG00000134827	TCN1	-7.58376	5.2865	13.6303	0.000222566	0.00301378
ENSG00000164932	CTHRC1	7.57332	5.2949	38.4962	5.48608e-10	8.1265e-08
ENSG00000244067	GSTA2	-7.56767	1.44953	9.25972	0.00234249	0.0181993
ENSG00000175352	NRIP3	7.55466	5.66424	35.4917	2.56135e-09	2.7334e-07
ENSG00000183844	FAM3B	-7.54608	4.6911	13.4194	0.000249033	0.00326427
ENSG00000105523	FAM83E	-7.54322	5.44191	40.6265	1.84289e-10	3.53335e-08
ENSG00000186198	SLC51B	-7.53677	2.55504	7.5346	0.00605252	0.0371896
ENSG00000117594	HSD11B1	7.52531	3.33687	20.4349	6.16947e-06	0.000180333
ENSG00000160886	LY6K	7.50727	6.13965	29.0475	7.0624e-08	4.61791e-06
ENSG00000163623	NKX6-1	7.49956	2.16271	18.6414	1.57761e-05	0.000390501
ENSG00000153976	HS3ST3A1	7.47838	3.74594	27.8384	1.31884e-07	7.69005e-06
ENSG00000049283	EPN3	-7.47719	6.6281	33.5065	7.10246e-09	6.86693e-07
ENSG00000129465	RIPK3	-7.46641	4.35884	17.0356	3.66861e-05	0.000760901
ENSG00000254521	SIGLEC12	-7.46081	0.217342	9.0685	0.0026005	0.0199031
ENSG00000121380	BCL2L14	-7.44012	5.22557	27.6863	1.42673e-07	8.2765e-06
ENSG00000164604	GPR85	7.43472	0.871016	19.7323	8.90822e-06	0.000243549
ENSG00000171033	PKIA	7.39593	4.46168	15.9648	6.4531e-05	0.00116609
ENSG00000135144	DTX1	-7.39078	3.02459	22.5928	2.00229e-06	7.28292e-05
ENSG00000123496	IL13RA2	7.38653	2.95968	31.1189	2.42691e-08	1.97505e-06
ENSG00000173421	CCDC36	7.36113	1.1613	38.1608	6.5149e-10	9.21207e-08
ENSG00000079931	MOXD1	7.35854	4.54713	17.7825	2.47644e-05	0.000556929
ENSG00000132746	ALDH3B2	-7.35318	4.31704	10.2253	0.00138528	0.0120591
ENSG00000175707	KDF1	-7.35029	5.84805	52.0099	5.52225e-13	2.83944e-10
ENSG00000188761	BCL2L15	-7.31999	5.86476	17.2962	3.19817e-05	0.000692953
ENSG00000110203	FOLR3	7.30882	-0.107319	28.926	7.51986e-08	4.88877e-06
ENSG00000130592	LSP1	7.28874	2.97012	27.4119	1.64417e-07	9.20734e-06
ENSG00000039068	CDH1	-7.27345	10.3708	22.7477	1.84729e-06	6.79892e-05
ENSG00000166035	LIPC	-7.26547	6.32256	8.8711	0.0028972	0.0216181
ENSG00000131386	GALNT15	7.25655	2.07908	28.7273	8.33225e-08	5.35536e-06
ENSG00000204542	C6orf15	-7.25465	2.65102	8.50065	0.00355019	0.0250529
ENSG00000198074	AKR1B10	-7.25226	8.71218	21.7689	3.0755e-06	0.000103851
ENSG00000169933	FRMPD4	7.25006	0.783539	31.1998	2.32795e-08	1.91367e-06
ENSG00000113083	LOX	7.24333	7.4467	48.4024	3.47136e-12	1.22713e-09
ENSG00000184867	ARMCX2	7.24115	4.56893	18.7261	1.50901e-05	0.00037682
ENSG00000108821	COL1A1	7.23166	11.1599	27.536	1.54198e-07	8.87023e-06
ENSG00000122176	FMOD	-7.22979	5.89669	10.2581	0.00136082	0.0118851
ENSG00000100234	TIMP3	7.22239	8.73143	18.414	1.7775e-05	0.000425997
ENSG00000144057	ST6GAL2	7.21568	0.975187	11.3062	0.000772473	0.00776041
ENSG00000136999	CCN3	7.21133	5.19668	38.7163	4.90109e-10	7.39215e-08
ENSG00000183742	MACC1	-7.20279	7.7218	32.5739	1.14748e-08	1.03018e-06
ENSG00000102452	NALCN	7.2012	1.98287	30.2131	3.87083e-08	2.91912e-06
ENSG00000108798	ABI3	7.19459	0.747551	17.1208	3.50758e-05	0.000737506
ENSG00000019505	SYT13	-7.19236	7.654	15.8047	7.0227e-05	0.00122783
ENSG00000253313	C1orf210	-7.16528	4.9456	36.3845	1.61989e-09	1.92886e-07
ENSG00000176988	FMR1NB	7.16103	1.23242	10.8122	0.00100831	0.00943422
ENSG00000119888	EPCAM	-7.16007	10.8952	40.2784	2.2023e-10	3.95436e-08
ENSG00000108684	ASIC2	7.15796	0.882163	18.5165	1.6844e-05	0.000408006
ENSG00000101842	VSIG1	-7.15351	5.35891	10.267	0.0013543	0.0118758
ENSG00000183098	GPC6	7.1483	4.08405	23.0621	1.56849e-06	5.93401e-05
ENSG00000170989	S1PR1	7.14709	2.59853	33.3062	7.87312e-09	7.4841e-07
ENSG00000145879	SPINK7	-7.1455	-0.0729278	8.35997	0.00383576	0.0264735
ENSG00000079102	RUNX1T1	7.1368	1.47915	8.84411	0.00294037	0.0218899
ENSG00000120498	TEX11	7.13662	3.9903	22.1969	2.46066e-06	8.64441e-05
ENSG00000167083	GNGT2	7.13427	-0.470005	30.6378	3.10972e-08	2.42601e-06
ENSG00000108242	CYP2C18	-7.10067	4.81445	12.1594	0.000488416	0.00551944
ENSG00000185862	EVI2B	7.08189	3.18787	24.5357	7.2947e-07	3.14953e-05
ENSG00000119411	BSPRY	-7.03068	6.36344	51.6838	6.51985e-13	3.07302e-10
ENSG00000256235	SMIM3	7.02025	-1.27864	15.8769	6.75974e-05	0.00120041
ENSG00000149506	ZP1	7.01986	-0.216969	15.1802	9.77204e-05	0.00158596
ENSG00000144152	FBLN7	7.01472	4.65123	19.4073	1.05604e-05	0.00028042
ENSG00000157992	KRTCAP3	-7.00783	6.68627	51.7485	6.30834e-13	3.07302e-10
ENSG00000105894	PTN	7.00745	3.30537	20.8876	4.87042e-06	0.000149713
ENSG00000176945	MUC20	-7.00343	6.86879	19.2803	1.12864e-05	0.000294855
ENSG00000138152	BTBD16	-6.99621	4.22197	15.3342	9.00688e-05	0.00149174
ENSG00000157680	DGKI	6.99569	3.64398	16.5898	4.64007e-05	0.000912843
ENSG00000167601	AXL	6.99434	9.06733	54.5035	1.55174e-13	9.75185e-11
ENSG00000154175	ABI3BP	6.99411	4.58173	43.7682	3.69661e-11	9.15409e-09
ENSG00000017427	IGF1	-6.99091	2.35628	7.00029	0.00814965	0.0463493
ENSG00000006611	USH1C	-6.98296	7.65838	16.4428	5.01406e-05	0.000962971
ENSG00000113578	FGF1	6.97636	2.53702	39.7874	2.83162e-10	4.78079e-08
ENSG00000166396	SERPINB7	6.97199	5.51834	23.48	1.26219e-06	4.94045e-05
ENSG00000135905	DOCK10	6.96315	4.36981	20.6644	5.47252e-06	0.000163017
ENSG00000150594	ADRA2A	-6.96272	4.86085	9.50989	0.00204368	0.0163148
ENSG00000090402	SI	-6.95222	-0.269687	8.53014	0.00349313	0.0247444
ENSG00000148123	PLPPR1	-6.94083	0.941192	7.41356	0.00647341	0.0389176
ENSG00000166126	AMN	-6.92724	6.98492	23.812	1.06217e-06	4.26073e-05
ENSG00000115602	IL1RL1	6.92681	4.00118	13.124	0.000291531	0.00368058
ENSG00000115461	IGFBP5	6.92556	7.06197	17.6368	2.6737e-05	0.000596547
ENSG00000079263	SP140	6.90463	3.30872	31.2425	2.27722e-08	1.89719e-06
ENSG00000138823	MTTP	-6.89861	4.71106	9.74397	0.00179911	0.0147582
ENSG00000127324	TSPAN8	-6.89531	10.1739	16.7075	4.36091e-05	0.000868497
ENSG00000055813	CCDC85A	6.88646	3.20098	15.5673	7.962e-05	0.00135032
ENSG00000183715	OPCML	6.88623	-1.44881	14.379	0.000149459	0.00222457
ENSG00000113263	ITK	6.88219	-0.019952	16.8592	4.02572e-05	0.000814651
ENSG00000178828	RNF186	-6.87329	2.12116	10.2403	0.00137405	0.0119748
ENSG00000196091	MYBPC1	-6.86923	3.39163	7.26725	0.00702231	0.0413553
ENSG00000146453	PNLDC1	6.86129	2.87689	20.0192	7.66668e-06	0.000216814
ENSG00000188641	DPYD	6.86051	6.1752	50.0664	1.48629e-12	6.46651e-10
ENSG00000205744	DENND1C	-6.84979	5.77065	54.3668	1.66347e-13	9.90376e-11
ENSG00000138080	EMILIN1	6.84596	6.05591	41.6244	1.10604e-10	2.27482e-08
ENSG00000087245	MMP2	6.84572	9.0885	9.54626	0.00200357	0.0160854
ENSG00000179914	ITLN1	-6.83382	2.13965	6.89633	0.00863727	0.048297
ENSG00000197273	GUCA2A	-6.82628	0.939577	6.9189	0.00852894	0.0479281
ENSG00000091986	CCDC80	6.82118	9.01071	30.9202	2.68859e-08	2.12681e-06
ENSG00000168621	GDNF	6.81502	4.32737	7.88309	0.00498991	0.0324029
ENSG00000148584	A1CF	-6.80816	5.21439	11.0871	0.0008693	0.00849916
ENSG00000087494	PTHLH	6.80672	5.53549	24.9668	5.83263e-07	2.62863e-05
ENSG00000100433	KCNK10	-6.80482	3.31127	14.1749	0.000166576	0.0024096
ENSG00000134516	DOCK2	6.80363	1.69229	27.4663	1.59854e-07	9.08677e-06
ENSG00000165591	FAAH2	-6.80005	4.32847	38.3384	5.94811e-10	8.62629e-08
ENSG00000163239	TDRD10	6.79407	-0.785045	7.52373	0.00608915	0.0372819
ENSG00000186007	LEMD1	-6.79327	4.10606	10.4369	0.00123525	0.0110514
ENSG00000152377	SPOCK1	6.78176	6.8004	24.1492	8.91535e-07	3.64081e-05
ENSG00000137960	GIPC2	-6.7693	6.2109	18.7529	1.488e-05	0.000372395
ENSG00000159167	STC1	6.76483	4.97135	39.2223	3.78192e-10	5.94182e-08
ENSG00000171451	DSEL	6.75849	5.16217	18.8007	1.45113e-05	0.000364782
ENSG00000167117	ANKRD40CL	-6.75415	3.86093	12.6309	0.000379413	0.00453691
ENSG00000154589	LY96	6.75066	2.97277	26.4437	2.71333e-07	1.36414e-05
ENSG00000105974	CAV1	6.7124	9.89318	34.3785	4.53713e-09	4.62379e-07
ENSG00000095539	SEMA4G	-6.70666	7.39332	37.2031	1.06443e-09	1.41657e-07
ENSG00000138356	AOX1	6.6983	4.95117	42.3625	7.58293e-11	1.61845e-08
ENSG00000156127	BATF	-6.69623	4.37088	13.5756	0.000229148	0.00307488
ENSG00000124343	XG	-6.68955	4.11458	6.88907	0.00867244	0.0483581
ENSG00000257743	MGAM2	-6.68651	6.73009	11.3932	0.000737144	0.00753511
ENSG00000162881	OXER1	-6.68478	1.65157	10.5246	0.00117796	0.0106601
ENSG00000145934	TENM2	6.6753	6.62372	18.0287	2.17599e-05	0.000501319
ENSG00000165323	FAT3	6.67316	4.5325	13.2959	0.000265987	0.00344262
ENSG00000089041	P2RX7	6.6684	1.97479	22.1831	2.47845e-06	8.67994e-05
ENSG00000099260	PALMD	6.66347	4.56105	25.4352	4.57488e-07	2.12967e-05
ENSG00000163501	IHH	-6.66069	6.00333	17.9696	2.24458e-05	0.000515023
ENSG00000150201	FXYD4	-6.65817	-0.46419	12.4619	0.00041533	0.00487367
ENSG00000100079	LGALS2	-6.65776	2.68285	7.4134	0.00647398	0.0389176
ENSG00000157399	ARSL	-6.64268	6.31891	14.2194	0.000162685	0.00236
ENSG00000088992	TESC	-6.6324	7.60163	20.2012	6.97081e-06	0.000200646
ENSG00000198739	LRRTM3	6.62792	1.47941	7.91163	0.0049118	0.0320428
ENSG00000086696	HSD17B2	-6.62366	7.81882	12.9536	0.000319303	0.00393459
ENSG00000127533	F2RL3	6.62046	-0.455773	31.1942	2.33457e-08	1.91367e-06
ENSG00000173546	CSPG4	6.61715	7.40176	37.0151	1.17216e-09	1.47796e-07
ENSG00000204941	PSG5	6.60436	4.46514	12.0057	0.000530376	0.00584046
ENSG00000115221	ITGB6	-6.60084	6.69421	25.4041	4.64933e-07	2.15546e-05
ENSG00000152495	CAMK4	6.58507	3.45787	45.1773	1.7998e-11	5.22035e-09
ENSG00000112539	C6orf118	6.57512	-0.903748	12.2958	0.000453984	0.00520839
ENSG00000176920	FUT2	-6.55894	6.78584	30.9415	2.65919e-08	2.11837e-06
ENSG00000185905	C16orf54	6.55682	3.03625	13.2102	0.000278428	0.00354682
ENSG00000135917	SLC19A3	-6.55248	5.31247	10.2874	0.00133942	0.0117727
ENSG00000177202	SPACA4	-6.54958	-0.538376	24.8977	6.04547e-07	2.70302e-05
ENSG00000156475	PPP2R2B	6.54567	3.53967	14.745	0.000123071	0.00191234
ENSG00000174469	CNTNAP2	-6.54468	5.89181	11.3428	0.000757391	0.00766333
ENSG00000139926	FRMD6	6.54046	8.29598	39.6226	3.08091e-10	5.05091e-08
ENSG00000162745	OLFML2B	6.53123	3.74464	29.2706	6.29448e-08	4.23828e-06
ENSG00000140297	GCNT3	-6.53073	8.40059	14.4761	0.000141948	0.00213526
ENSG00000128710	HOXD10	6.52753	2.82626	10.6946	0.00107451	0.00993039
ENSG00000144218	AFF3	6.51923	3.393	19.4142	1.05224e-05	0.000280313
ENSG00000196184	OR10J1	6.50964	-1.70908	8.58482	0.00338976	0.0241788
ENSG00000166106	ADAMTS15	6.50819	5.11439	25.7163	3.95473e-07	1.87966e-05
ENSG00000196549	MME	6.50419	7.74785	23.3863	1.32521e-06	5.15147e-05
ENSG00000104327	CALB1	-6.50201	6.15167	7.5233	0.00609061	0.0372819
ENSG00000106538	RARRES2	6.49649	6.40799	45.8284	1.29076e-11	3.90347e-09
ENSG00000152580	IGSF10	6.48916	3.83554	36.5383	1.49693e-09	1.81475e-07
ENSG00000146216	TTBK1	-6.48474	3.24358	10.151	0.0014422	0.012378
ENSG00000167178	ISLR2	6.47616	2.54959	10.7832	0.00102426	0.00955186
ENSG00000142173	COL6A2	6.45771	8.80459	15.2917	9.21203e-05	0.00151905
ENSG00000178796	RIIAD1	-6.44531	-0.640162	8.90194	0.00284868	0.0213123
ENSG00000215182	MUC5AC	-6.43477	4.73134	11.3315	0.000762051	0.0077007
ENSG00000117600	PLPPR4	6.43256	0.36352	10.5302	0.00117438	0.0106429
ENSG00000005187	ACSM3	-6.41826	6.7448	24.4698	7.54844e-07	3.23439e-05
ENSG00000198203	SULT1C2	-6.4172	7.01221	12.4047	0.000428245	0.00497873
ENSG00000203837	PNLIPRP3	6.41714	0.545075	7.3188	0.00682369	0.0405747
ENSG00000102755	FLT1	6.40842	3.61394	19.7273	8.93169e-06	0.000243549
ENSG00000137959	IFI44L	6.40714	5.15866	21.6101	3.34093e-06	0.000111483
ENSG00000182870	GALNT9	6.40683	3.46998	16.1928	5.72109e-05	0.00106268
ENSG00000155816	FMN2	6.4045	3.66861	14.3791	0.000149453	0.00222457
ENSG00000137801	THBS1	6.39964	10.4168	22.9144	1.69378e-06	6.32346e-05
ENSG00000171872	KLF17	6.37687	-0.160783	18.5715	1.63646e-05	0.000400685
ENSG00000178623	GPR35	-6.37587	7.11219	26.678	2.40346e-07	1.24491e-05
ENSG00000079385	CEACAM1	-6.3728	8.82736	21.4091	3.71004e-06	0.000121646
ENSG00000160862	AZGP1	-6.36928	8.59578	8.81114	0.00299398	0.0221617
ENSG00000197467	COL13A1	6.36841	4.1748	26.6726	2.41014e-07	1.24491e-05
ENSG00000124839	RAB17	-6.36059	6.07894	27.5227	1.5526e-07	8.87023e-06
ENSG00000162482	AKR7A3	-6.35518	5.9385	28.0078	1.20828e-07	7.11876e-06
ENSG00000138449	SLC40A1	-6.3521	8.56518	16.2811	5.46048e-05	0.00102777
ENSG00000137809	ITGA11	6.34232	4.69122	13.7521	0.000208592	0.00287756
ENSG00000137491	SLCO2B1	-6.34101	6.68273	16.5019	4.86017e-05	0.000946268
ENSG00000138964	PARVG	6.33649	1.37285	22.3437	2.27958e-06	8.13459e-05
ENSG00000128298	BAIAP2L2	-6.32817	6.82949	20.509	5.93513e-06	0.000174839
ENSG00000215018	COL28A1	-6.32347	3.66315	14.5145	0.000139081	0.00210332
ENSG00000167608	TMC4	-6.31975	7.33058	30.2978	3.70547e-08	2.83218e-06
ENSG00000072858	SIDT1	-6.31126	5.1924	14.2679	0.000158542	0.00231709
ENSG00000189367	KIAA0408	6.30856	3.37062	14.3869	0.000148832	0.00222109
ENSG00000198768	APCDD1L	6.30398	3.77712	13.4275	0.000247965	0.00325717
ENSG00000249751	ECSCR	6.30208	1.01401	6.86255	0.00880207	0.0488323
ENSG00000132972	RNF17	6.29977	0.958456	12.2288	0.000470567	0.00536598
ENSG00000131711	MAP1B	6.29951	8.80261	21.2197	4.09539e-06	0.000131238
ENSG00000156113	KCNMA1	6.29922	5.50383	20.4972	5.97196e-06	0.000175467
ENSG00000124212	PTGIS	6.29907	6.42797	11.4791	0.000703831	0.007271
ENSG00000173262	SLC2A14	6.2844	2.24604	22.2274	2.42192e-06	8.53481e-05
ENSG00000139055	ERP27	-6.28305	3.77369	15.3436	8.96259e-05	0.00148876
ENSG00000168631	MUCL3	-6.2817	3.02716	9.90717	0.00164636	0.0136939
ENSG00000065361	ERBB3	-6.2809	9.5768	41.5544	1.14638e-10	2.31569e-08
ENSG00000105550	FGF21	-6.28056	0.519743	8.59536	0.0033702	0.0240904
ENSG00000136881	BAAT	-6.2797	3.77784	11.347	0.000755714	0.00766105
ENSG00000164690	SHH	-6.27772	6.15703	14.9836	0.000108449	0.0017309
ENSG00000114378	HYAL1	-6.27452	5.26024	14.2166	0.000162931	0.00236
ENSG00000183780	SLC35F3	6.27422	1.59719	24.2079	8.64782e-07	3.55724e-05
ENSG00000196620	UGT2B15	-6.26911	0.328794	11.7008	0.000624721	0.00663572
ENSG00000185640	KRT79	6.26832	0.52546	24.4419	7.65835e-07	3.2691e-05
ENSG00000129538	RNASE1	-6.26502	5.49912	14.717	0.000124918	0.00193306
ENSG00000130513	GDF15	-6.26477	10.003	28.4073	9.82927e-08	5.97789e-06
ENSG00000007062	PROM1	-6.2646	6.77709	10.2592	0.00136008	0.0118851
ENSG00000148680	HTR7	6.23826	2.9706	16.0697	6.10521e-05	0.00111468
ENSG00000162366	PDZK1IP1	-6.23667	5.0936	10.9849	0.000918575	0.00884333
ENSG00000182261	NLRP10	6.2349	2.34228	15.7316	7.2995e-05	0.00126644
ENSG00000166866	MYO1A	-6.22946	6.51194	11.3784	0.00074305	0.00757242
ENSG00000113721	PDGFRB	6.22624	5.02783	35.7743	2.21546e-09	2.43313e-07
ENSG00000011465	DCN	6.2221	3.84811	18.8847	1.38862e-05	0.000349846
ENSG00000134769	DTNA	6.21052	3.91491	16.5495	4.73959e-05	0.000930803
ENSG00000105989	WNT2	6.20232	0.431565	13.0696	0.000300122	0.00375136
ENSG00000187288	CIDEC	-6.19925	3.0404	8.43174	0.00368727	0.025668
ENSG00000164318	EGFLAM	6.1967	3.49024	11.4569	0.000712303	0.00734139
ENSG00000182752	PAPPA	6.1897	3.76436	35.9092	2.06735e-09	2.36221e-07
ENSG00000044012	GUCA2B	-6.18792	-0.790102	7.23908	0.00713337	0.041788
ENSG00000120708	TGFBI	6.17775	10.4438	24.782	6.41929e-07	2.81454e-05
ENSG00000140600	SH3GL3	6.17499	3.18508	10.4604	0.00121963	0.0109495
ENSG00000110777	POU2AF1	-6.17246	3.25665	8.40241	0.00374724	0.0259735
ENSG00000092969	TGFB2	6.17224	7.43536	33.4047	7.48422e-09	7.1747e-07
ENSG00000100368	CSF2RB	6.17054	3.23025	11.515	0.00069037	0.00717123
ENSG00000104267	CA2	-6.16539	7.1333	13.2476	0.000272924	0.00350036
ENSG00000074276	CDHR2	-6.1623	5.00716	9.35614	0.0022224	0.0174141
ENSG00000160255	ITGB2	6.14749	4.46845	41.8632	9.78901e-11	2.05062e-08
ENSG00000150628	SPATA4	6.14327	0.203702	22.4021	2.21137e-06	7.94128e-05
ENSG00000106258	CYP3A5	-6.14282	7.09067	20.2904	6.65345e-06	0.00019348
ENSG00000101049	SGK2	-6.14043	6.0349	16.4861	4.90092e-05	0.00094807
ENSG00000169507	SLC38A11	-6.13418	1.16902	7.29515	0.00691409	0.0409308
ENSG00000238243	OR2W3	6.13315	1.38644	9.12686	0.00251884	0.0193467
ENSG00000187957	DNER	6.12539	5.4188	18.3176	1.86972e-05	0.000444333
ENSG00000125430	HS3ST3B1	6.12157	3.5466	28.3142	1.03135e-07	6.20564e-06
ENSG00000115380	EFEMP1	6.11887	6.78279	9.89175	0.00166021	0.0137787
ENSG00000174837	ADGRE1	6.11525	2.13875	14.1542	0.000168421	0.00242698
ENSG00000126218	F10	-6.11505	4.6003	8.41378	0.00372388	0.0258592
ENSG00000154864	PIEZO2	6.10025	4.89999	16.4784	4.92072e-05	0.000949885
ENSG00000139292	LGR5	-6.08672	7.27035	9.62949	0.00191478	0.0155298
ENSG00000034239	EFCAB1	6.08463	-1.53125	15.8814	6.74373e-05	0.00119945
ENSG00000134853	PDGFRA	6.08367	7.98952	7.58578	0.00588306	0.0364853
ENSG00000099998	GGT5	6.07522	1.22928	22.3237	2.30344e-06	8.19386e-05
ENSG00000253250	C8orf88	6.05678	1.76016	18.0666	2.13308e-05	0.000493445
ENSG00000151490	PTPRO	-6.04934	4.43008	7.98311	0.00472157	0.0311431
ENSG00000065534	MYLK	6.03863	7.26677	58.7184	1.81934e-14	1.37203e-11
ENSG00000091583	APOH	-6.03602	2.60243	8.01127	0.0046487	0.0307521
ENSG00000142698	C1orf94	6.03573	-1.74156	9.68252	0.00186029	0.0151285
ENSG00000165188	RNF183	-6.0355	2.21879	11.9476	0.000547166	0.0059687
ENSG00000053918	KCNQ1	-6.03389	7.34634	15.8458	6.87182e-05	0.00120705
ENSG00000158473	CD1D	6.03329	0.179876	22.7416	1.85317e-06	6.79892e-05
ENSG00000152779	SLC16A12	6.01613	1.71235	18.4806	1.71645e-05	0.000413998
ENSG00000148541	FAM13C	6.01184	1.22696	33.6173	6.70943e-09	6.59974e-07
ENSG00000164078	MST1R	-6.00919	7.68112	30.3271	3.64982e-08	2.80862e-06
ENSG00000196104	SPOCK3	6.00917	-1.2553	7.68157	0.00557877	0.0351948
ENSG00000166592	RRAD	6.00679	4.99554	35.1061	3.12227e-09	3.27028e-07
ENSG00000140285	FGF7	5.99764	1.13741	17.1374	3.47707e-05	0.000735189
ENSG00000144045	DQX1	-5.99452	4.96946	13.5411	0.0002334	0.00311714
ENSG00000159618	ADGRG5	-5.98511	4.26114	15.2756	9.29088e-05	0.00152759
ENSG00000189350	TOGARAM2	5.97122	2.84866	40.3887	2.08147e-10	3.79767e-08
ENSG00000154734	ADAMTS1	5.96873	7.66721	9.64264	0.00190112	0.0154382
ENSG00000196136	SERPINA3	-5.96165	4.6339	9.59516	0.00195091	0.0157634
ENSG00000163430	FSTL1	5.95546	9.55045	20.8226	5.03844e-06	0.000153212
ENSG00000138722	MMRN1	-5.94989	-0.984044	7.45103	0.00634001	0.0384342
ENSG00000106927	AMBP	-5.94972	2.39634	10.1981	0.00140588	0.0121214
ENSG00000112212	TSPO2	-5.94667	0.0211144	9.54405	0.00200599	0.0160862
ENSG00000073754	CD5L	5.94248	-1.89711	28.3706	1.00174e-07	6.05973e-06
ENSG00000156535	CD109	5.93995	7.93903	43.0368	5.372e-11	1.21536e-08
ENSG00000132321	IQCA1	5.93433	-0.263284	19.936	8.00791e-06	0.000223117
ENSG00000149043	SYT8	-5.93024	5.48247	10.5291	0.00117512	0.0106429
ENSG00000089127	OAS1	-5.92567	8.48677	31.6608	1.83593e-08	1.55453e-06
ENSG00000172967	XKR3	5.92451	0.270504	14.9276	0.000111718	0.00176503
ENSG00000149968	MMP3	5.92356	2.31648	15.8905	6.7116e-05	0.00119939
ENSG00000109943	CRTAM	5.91384	-0.333557	21.603	3.35319e-06	0.000111563
ENSG00000138411	HECW2	5.912	4.56546	26.1879	3.09759e-07	1.51342e-05
ENSG00000197353	LYPD2	5.90601	2.98932	14.5041	0.000139857	0.00211223
ENSG00000123610	TNFAIP6	5.89585	-0.699756	11.9714	0.000540246	0.00591603
ENSG00000153292	ADGRF1	-5.89	8.56782	11.1916	0.000821672	0.00812478
ENSG00000170214	ADRA1B	5.87838	1.57279	15.7909	7.07405e-05	0.0012349
ENSG00000184905	TCEAL2	5.87132	-1.83215	17.2929	3.2038e-05	0.000692953
ENSG00000162692	VCAM1	5.86878	-0.322998	26.2094	3.06331e-07	1.50661e-05
ENSG00000162949	CAPN13	-5.86672	3.02083	7.56523	0.0059505	0.0368026
ENSG00000115363	EVA1A	5.86576	4.55758	24.0945	9.1723e-07	3.71889e-05
ENSG00000122711	SPINK4	-5.86446	5.74849	8.70219	0.00317828	0.0231654
ENSG00000168454	TXNDC2	5.8616	-0.468438	35.496	2.55571e-09	2.7334e-07
ENSG00000142973	CYP4B1	-5.86017	1.76185	9.91429	0.00164001	0.013651
ENSG00000151632	AKR1C2	-5.85821	6.91192	8.92374	0.00281487	0.0211153
ENSG00000140945	CDH13	5.85645	4.57189	10.558	0.00115689	0.0105115
ENSG00000154493	C10orf90	5.8563	-1.40585	39.9629	2.58833e-10	4.43624e-08
ENSG00000105695	MAG	5.85503	0.195816	9.84346	0.00170437	0.0140523
ENSG00000134323	MYCN	-5.85238	3.99043	8.35195	0.00385274	0.0265583
ENSG00000009950	MLXIPL	-5.85136	6.85027	15.7004	7.42073e-05	0.00127962
ENSG00000183018	SPNS2	-5.84872	7.3075	12.4712	0.000413264	0.0048595
ENSG00000147168	IL2RG	-5.83894	6.16554	11.4016	0.000733827	0.00752589
ENSG00000154553	PDLIM3	5.83082	2.92862	18.2096	1.97881e-05	0.000467313
ENSG00000183960	KCNH8	-5.83022	3.28224	11.2804	0.000783296	0.00784823
ENSG00000166147	FBN1	5.82624	7.70501	22.2642	2.37599e-06	8.39912e-05
ENSG00000152092	ASTN1	5.8215	1.34964	9.69371	0.001849	0.0150799
ENSG00000015520	NPC1L1	-5.82053	5.25486	9.09954	0.00255674	0.0195947
ENSG00000158104	HPD	5.81605	1.17514	27.3449	1.7021e-07	9.4383e-06
ENSG00000165168	CYBB	-5.81217	2.60717	19.6773	9.16837e-06	0.000248709
ENSG00000124602	UNC5CL	-5.80596	5.92149	17.0961	3.55355e-05	0.000743027
ENSG00000163898	LIPH	-5.79697	7.91237	21.9828	2.75109e-06	9.48789e-05
ENSG00000189320	FAM180A	5.79323	-0.546948	23.9087	1.01013e-06	4.08092e-05
ENSG00000163145	C1QTNF7	5.79017	-2.01975	12.0946	0.000505682	0.00565803
ENSG00000154678	PDE1C	5.7801	6.16423	16.1831	5.75061e-05	0.00106393
ENSG00000137672	TRPC6	5.77803	2.66124	14.0602	0.000177048	0.00252238
ENSG00000176788	BASP1	5.77067	7.12419	9.05187	0.00262427	0.0200107
ENSG00000170579	DLGAP1	-5.7676	3.05435	10.4889	0.00120093	0.0108246
ENSG00000172264	MACROD2	-5.76642	5.14292	10.6039	0.00112847	0.0103195
ENSG00000112183	RBM24	5.7652	3.82238	14.6074	0.000132393	0.00202656
ENSG00000157554	ERG	5.76403	-0.537242	14.3439	0.000152269	0.0022516
ENSG00000041982	TNC	5.75115	7.86811	24.3779	7.91705e-07	3.36683e-05
ENSG00000140807	NKD1	-5.7492	5.70581	9.32934	0.00225513	0.0176053
ENSG00000131914	LIN28A	5.74894	0.911928	9.52081	0.00203155	0.0162409
ENSG00000132744	ACY3	-5.74786	3.72066	13.1665	0.000284998	0.00361871
ENSG00000162733	DDR2	5.73686	5.43158	47.3541	5.92526e-12	1.91504e-09
ENSG00000197928	ZNF677	5.73601	0.262943	6.99652	0.00816682	0.0464237
ENSG00000149573	MPZL2	-5.72843	7.59317	26.6965	2.38049e-07	1.24491e-05
ENSG00000168477	TNXB	5.71441	7.06793	27.3725	1.67802e-07	9.35061e-06
ENSG00000164176	EDIL3	5.71201	7.10682	11.3251	0.000764656	0.00771501
ENSG00000113532	ST8SIA4	5.7059	2.22434	11.6715	0.000634634	0.0067103
ENSG00000164379	FOXQ1	-5.69592	8.27924	20.5583	5.78417e-06	0.000170837
ENSG00000138131	LOXL4	5.69534	6.96359	17.5293	2.8291e-05	0.000625054
ENSG00000140379	BCL2A1	5.68126	0.332146	15.4506	8.46913e-05	0.00142141
ENSG00000162892	IL24	5.67438	2.23751	26.1692	3.12764e-07	1.51845e-05
ENSG00000174950	CD164L2	-5.67118	0.708691	18.0692	2.13017e-05	0.000493445
ENSG00000169744	LDB2	5.66885	3.07507	12.0793	0.000509839	0.00569328
ENSG00000182583	VCX	5.65105	1.87482	8.73964	0.00311366	0.0228238
ENSG00000214290	COLCA2	-5.65026	4.8437	15.9484	6.50935e-05	0.00117251
ENSG00000163032	VSNL1	-5.64874	5.56317	10.5821	0.00114186	0.0104083
ENSG00000038427	VCAN	5.64815	6.44284	11.8574	0.000574328	0.00619532
ENSG00000173801	JUP	-5.64205	12.3118	13.6766	0.000217138	0.00296165
ENSG00000047597	XK	-5.64204	6.40091	27.3347	1.71114e-07	9.44213e-06
ENSG00000137691	CFAP300	5.63422	4.78078	13.9469	0.000188044	0.00265563
ENSG00000136689	IL1RN	-5.6199	5.80733	15.4235	8.59111e-05	0.00143974
ENSG00000104313	EYA1	5.61392	1.66773	18.0875	2.1098e-05	0.0004931
ENSG00000114812	VIPR1	-5.60799	6.2062	21.3974	3.73283e-06	0.00012203
ENSG00000214338	SOGA3	5.60525	3.11749	23.3423	1.35585e-06	5.25252e-05
ENSG00000145536	ADAMTS16	5.60062	3.3924	20.7256	5.30026e-06	0.000159036
ENSG00000123243	ITIH5	5.59723	3.45895	7.87679	0.00500733	0.0324787
ENSG00000011201	ANOS1	5.58212	3.18603	8.12187	0.00437344	0.0294128
ENSG00000198326	TMEM239	5.58053	-2.03973	29.578	5.37112e-08	3.79738e-06
ENSG00000188171	ZNF626	5.57556	3.75002	9.03821	0.00264394	0.0200997
ENSG00000187240	DYNC2H1	5.56287	7.39164	28.4456	9.63672e-08	5.89247e-06
ENSG00000145192	AHSG	-5.5575	0.0340006	7.52451	0.00608651	0.0372819
ENSG00000163395	IGFN1	5.55705	3.52969	26.5835	2.52388e-07	1.28604e-05
ENSG00000205642	VCX3B	5.53375	2.74674	7.89592	0.00495465	0.0321924
ENSG00000150656	CNDP1	-5.53354	2.0232	8.15835	0.00428634	0.028913
ENSG00000203499	IQANK1	-5.53288	7.75319	25.7448	3.89675e-07	1.8678e-05
ENSG00000049249	TNFRSF9	5.52805	2.91826	27.0762	1.95592e-07	1.07084e-05
ENSG00000196542	SPTSSB	-5.5273	4.56782	10.8441	0.000991105	0.00932727
ENSG00000128713	HOXD11	5.52566	2.27166	10.1326	0.00145672	0.0124742
ENSG00000151715	TMEM45B	-5.5184	8.84632	15.7201	7.34379e-05	0.00127047
ENSG00000101076	HNF4A	-5.51658	8.43196	13.9386	0.000188881	0.00266412
ENSG00000138079	SLC3A1	-5.51184	4.30747	11.1649	0.000833573	0.00822807
ENSG00000165071	TMEM71	5.5042	0.4796	23.1568	1.49312e-06	5.72549e-05
ENSG00000130234	ACE2	-5.50168	5.60664	10.8793	0.000972432	0.00917444
ENSG00000143248	RGS5	-5.501	7.44664	11.6393	0.000645719	0.00679477
ENSG00000174348	PODN	5.49683	-0.101071	10.8246	0.00100162	0.00941434
ENSG00000259120	SMIM6	-5.49527	3.1937	17.8774	2.35602e-05	0.000534095
ENSG00000150051	MKX	5.49294	3.74064	11.1009	0.000862864	0.00845816
ENSG00000104368	PLAT	5.49059	7.49811	30.1602	3.97787e-08	2.97998e-06
ENSG00000185652	NTF3	5.48569	1.12583	12.0278	0.000524133	0.00577875
ENSG00000204610	TRIM15	-5.48362	6.0038	10.9891	0.000916472	0.00884333
ENSG00000113739	STC2	5.48285	8.05818	14.7258	0.000124333	0.00192665
ENSG00000095752	IL11	5.48022	4.32415	55.2677	1.05184e-13	6.99905e-11
ENSG00000165025	SYK	-5.47075	7.44305	19.0602	1.26659e-05	0.000324156
ENSG00000175946	KLHL38	5.466	-0.971216	28.6225	8.7952e-08	5.54663e-06
ENSG00000204421	LY6G6C	-5.46329	2.71778	10.2005	0.00140404	0.0121148
ENSG00000171236	LRG1	-5.46308	5.49452	16.9464	3.84496e-05	0.000793689
ENSG00000116983	HPCAL4	5.46104	1.03645	21.5846	3.38555e-06	0.000112309
ENSG00000169554	ZEB2	5.46034	5.11585	7.70628	0.00550291	0.0348538
ENSG00000152952	PLOD2	5.45965	8.71759	15.6214	7.73747e-05	0.00132016
ENSG00000182795	C1orf116	-5.45651	8.0272	26.3425	2.85932e-07	1.41862e-05
ENSG00000125850	OVOL2	-5.44604	5.54645	18.9534	1.33953e-05	0.000340511
ENSG00000130768	SMPDL3B	-5.44333	5.98357	23.5969	1.18778e-06	4.68158e-05
ENSG00000112541	PDE10A	5.44009	3.67966	18.0667	2.13296e-05	0.000493445
ENSG00000131378	RFTN1	5.43579	4.97814	18.9039	1.37471e-05	0.000347736
ENSG00000181885	CLDN7	-5.43166	9.40158	43.7546	3.72249e-11	9.15409e-09
ENSG00000196159	FAT4	5.43079	4.91406	16.8625	4.01869e-05	0.000814651
ENSG00000002587	HS3ST1	-5.42897	5.03339	17.0015	3.73499e-05	0.000772399
ENSG00000196071	OR2L13	5.42778	-2.1382	7.83656	0.00512	0.0329826
ENSG00000165816	VWA2	-5.42347	3.85947	8.00463	0.00466579	0.0308471
ENSG00000127920	GNG11	5.42047	5.85988	10.9879	0.000917096	0.00884333
ENSG00000163637	PRICKLE2	5.41897	4.63061	16.3352	5.30679e-05	0.00100385
ENSG00000078596	ITM2A	5.41619	1.50061	8.40755	0.00373666	0.025932
ENSG00000114270	COL7A1	5.40427	7.34242	48.0231	4.2122e-12	1.44389e-09
ENSG00000133962	CATSPERB	-5.40408	1.5523	20.9267	4.77194e-06	0.000147891
ENSG00000189001	SBSN	5.39767	2.30257	27.4268	1.63154e-07	9.18207e-06
ENSG00000112964	GHR	5.39269	2.27045	7.1203	0.00762161	0.0439876
ENSG00000176532	PRR15	-5.39234	7.40926	12.756	0.000354862	0.00429326
ENSG00000131620	ANO1	-5.39192	8.4131	13.7238	0.00021175	0.00290341
ENSG00000091656	ZFHX4	5.3903	5.18502	17.6231	2.69295e-05	0.00059848
ENSG00000185052	SLC24A3	5.39014	2.64146	14.3342	0.00015306	0.00226033
ENSG00000112280	COL9A1	-5.38963	-1.37107	8.47423	0.00360214	0.0252149
ENSG00000143469	SYT14	5.3891	3.26498	23.0796	1.55429e-06	5.90005e-05
ENSG00000117834	SLC5A9	-5.38677	0.0310764	15.3041	9.15173e-05	0.0015113
ENSG00000187533	PRR27	-5.37698	-1.40996	7.43123	0.00641016	0.0387804
ENSG00000253953	PCDHGB4	5.37356	2.21552	18.9277	1.35765e-05	0.000344343
ENSG00000162511	LAPTM5	5.36686	2.64774	35.8452	2.13629e-09	2.39265e-07
ENSG00000165556	CDX2	-5.34934	7.25901	11.4823	0.000702631	0.00726523
ENSG00000160181	TFF2	-5.33597	6.47219	8.65646	0.00325904	0.0235114
ENSG00000259207	ITGB3	5.32188	3.31149	14.2992	0.000155931	0.00228483
ENSG00000167588	GPD1	-5.31924	4.3318	10.1764	0.0014225	0.012246
ENSG00000146038	DCDC2	-5.31387	5.51965	6.8488	0.00887007	0.0490891
ENSG00000135702	CHST5	-5.31323	2.33496	7.54902	0.00600426	0.0370339
ENSG00000165072	MAMDC2	5.31312	4.95423	15.2279	9.52845e-05	0.00155426
ENSG00000257987	TEX49	-5.31308	-1.4642	9.33149	0.00225249	0.0175968
ENSG00000138944	SHISAL1	5.313	3.34428	10.1326	0.0014567	0.0124742
ENSG00000183734	ASCL2	-5.30985	5.3857	8.38752	0.00377807	0.0261391
ENSG00000065618	COL17A1	-5.30288	9.53367	16.7176	4.33764e-05	0.000866914
ENSG00000184012	TMPRSS2	-5.30188	7.93063	13.7369	0.000210278	0.00288991
ENSG00000170927	PKHD1	-5.30073	2.61713	7.64988	0.00567762	0.0356411
ENSG00000159173	TNNI1	-5.29862	2.75551	20.7563	5.21585e-06	0.000156919
ENSG00000003147	ICA1	-5.29531	7.10024	29.6099	5.28332e-08	3.78259e-06
ENSG00000116771	AGMAT	-5.29459	6.2969	20.8367	5.00147e-06	0.00015291
ENSG00000110675	ELMOD1	5.29176	1.93066	9.47323	0.00208492	0.0165855
ENSG00000101342	TLDC2	-5.28887	5.10053	13.7563	0.000208126	0.00287463
ENSG00000149418	ST14	-5.28849	10.3653	16.8769	3.98836e-05	0.000811445
ENSG00000099834	CDHR5	-5.28156	5.63446	12.0465	0.000518908	0.00575479
ENSG00000130035	GALNT8	-5.28147	1.74384	8.79685	0.00301751	0.0222953
ENSG00000072840	EVC	5.28025	6.29174	11.8477	0.000577321	0.00621375
ENSG00000110900	TSPAN11	5.27946	3.37783	20.6283	5.57653e-06	0.000165569
ENSG00000023839	ABCC2	-5.27555	7.28854	9.87787	0.00167279	0.0138627
ENSG00000187398	LUZP2	5.27492	1.79992	8.43842	0.00367375	0.0256054
ENSG00000164483	SAMD3	5.27025	0.988976	9.22642	0.00238547	0.0184698
ENSG00000124440	HIF3A	-5.2658	0.855564	13.0075	0.000310238	0.00384188
ENSG00000102802	MEDAG	5.26203	-1.53406	11.855	0.00057506	0.00619532
ENSG00000124939	SCGB2A1	-5.25767	-1.44023	7.96183	0.0047774	0.031365
ENSG00000164236	ANKRD33B	5.24839	2.26566	13.9993	0.000182877	0.00259561
ENSG00000138311	ZNF365	5.24735	2.8577	19.948	7.95787e-06	0.00022282
ENSG00000113389	NPR3	5.2355	3.58763	17.1294	3.49178e-05	0.000736921
ENSG00000170577	SIX2	5.23004	2.88706	13.008	0.000310166	0.00384188
ENSG00000173432	SAA1	5.22365	5.51353	13.9265	0.000190101	0.00267466
ENSG00000131037	EPS8L1	-5.22348	7.28567	26.5955	2.50825e-07	1.28386e-05
ENSG00000166268	MYRFL	-5.21574	1.89087	13.6752	0.000217306	0.00296165
ENSG00000170153	RNF150	5.21096	1.95025	10.8064	0.00101152	0.00945643
ENSG00000135636	DYSF	5.20394	5.15337	20.9043	4.82818e-06	0.000149225
ENSG00000136630	HLX	5.20329	3.00721	32.1714	1.41155e-08	1.23779e-06
ENSG00000170961	HAS2	5.18449	6.19426	11.3926	0.000737391	0.00753511
ENSG00000050628	PTGER3	5.18391	0.242011	12.7139	0.000362952	0.00437709
ENSG00000171860	C3AR1	5.17795	-0.946518	26.8215	2.23142e-07	1.19513e-05
ENSG00000147676	MAL2	-5.17716	10.4306	15.752	7.22107e-05	0.00125476
ENSG00000164330	EBF1	5.17292	1.7115	8.04799	0.00455541	0.0302589
ENSG00000184486	POU3F2	5.17252	1.17769	14.3114	0.000154927	0.00227898
ENSG00000133687	TMTC1	5.16993	6.26991	16.7316	4.30584e-05	0.000862083
ENSG00000204866	IGFL2	-5.16728	6.15878	7.42735	0.00642398	0.0387977
ENSG00000233493	TMEM238	-5.16467	4.78171	23.397	1.31783e-06	5.14043e-05
ENSG00000136244	IL6	5.16268	2.96811	13.6079	0.000225237	0.00303319
ENSG00000171724	VAT1L	5.15972	0.0429205	10.1003	0.00148242	0.0126248
ENSG00000122870	BICC1	5.15623	4.6416	10.2211	0.00138843	0.0120629
ENSG00000173706	HEG1	5.14773	7.99976	37.9754	7.16423e-10	9.88314e-08
ENSG00000183091	NEB	-5.14273	6.70874	7.38083	0.00659228	0.0394978
ENSG00000114656	KIAA1257	-5.14083	2.66418	11.6265	0.000650186	0.00683541
ENSG00000159164	SV2A	5.13973	4.15395	20.9625	4.68352e-06	0.000146183
ENSG00000141433	ADCYAP1	5.13343	-1.99614	14.1682	0.00016717	0.0024151
ENSG00000165140	FBP1	-5.12254	6.50172	8.5847	0.00338999	0.0241788
ENSG00000156298	TSPAN7	-5.1225	3.96452	7.71535	0.00547532	0.0346985
ENSG00000102890	ELMO3	-5.11386	6.93121	35.3289	2.78463e-09	2.9439e-07
ENSG00000100033	PRODH	-5.11364	7.27936	10.3081	0.00132451	0.0117053
ENSG00000145863	GABRA6	5.10965	-2.27811	7.37558	0.00661154	0.0395923
ENSG00000163362	INAVA	-5.1089	7.7104	44.6009	2.41576e-11	6.71899e-09
ENSG00000167642	SPINT2	-5.10706	11.0978	24.2878	8.29612e-07	3.45021e-05
ENSG00000008118	CAMK1G	5.10616	0.301058	15.1723	9.81326e-05	0.00159037
ENSG00000115165	CYTIP	-5.102	1.31367	9.39946	0.0021705	0.0171738
ENSG00000145794	MEGF10	5.10041	0.740929	27.0726	1.95955e-07	1.07084e-05
ENSG00000163701	IL17RE	-5.09004	5.61351	14.8511	0.000116342	0.00182224
ENSG00000185760	KCNQ5	5.08552	3.43067	8.31848	0.00392437	0.0269434
ENSG00000186529	CYP4F3	-5.0815	5.97966	10.3594	0.00128816	0.0114377
ENSG00000140795	MYLK3	5.07619	1.47706	23.0841	1.55067e-06	5.90005e-05
ENSG00000171766	GATM	-5.06794	7.33949	9.30947	0.00227973	0.0177483
ENSG00000123119	NECAB1	5.06499	1.20907	19.4921	1.01018e-05	0.000270145
ENSG00000183853	KIRREL1	5.05955	7.60641	13.8252	0.000200625	0.00279491
ENSG00000134013	LOXL2	5.05697	8.31905	15.7045	7.4048e-05	0.00127883
ENSG00000159251	ACTC1	5.05642	-1.16321	15.1997	9.672e-05	0.00157346
ENSG00000105131	EPHX3	-5.05629	2.18137	7.85076	0.00507993	0.0328179
ENSG00000146477	SLC22A3	-5.0555	5.14014	7.51384	0.00612268	0.0373771
ENSG00000000971	CFH	5.05424	3.91364	18.533	1.66987e-05	0.000405356
ENSG00000133135	RNF128	-5.05399	7.78841	12.0368	0.000521592	0.00575634
ENSG00000182327	GLTPD2	-5.05386	3.45193	13.7028	0.000214139	0.00292906
ENSG00000163864	NMNAT3	-5.05343	4.13721	11.3305	0.000762445	0.0077007
ENSG00000126460	PRRG2	-5.05016	4.42559	42.8536	5.8993e-11	1.30849e-08
ENSG00000163082	SGPP2	-5.04849	6.46132	16.0461	6.18183e-05	0.00112245
ENSG00000256980	KHDC1L	5.04748	0.560382	16.0738	6.09207e-05	0.00111468
ENSG00000129170	CSRP3	5.04487	-1.60705	19.9836	7.81106e-06	0.000219798
ENSG00000177575	CD163	5.04395	0.494481	11.6898	0.000628433	0.00666245
ENSG00000114805	PLCH1	-5.03141	5.23855	29.0503	7.05245e-08	4.61791e-06
ENSG00000198796	ALPK2	5.02645	5.26135	13.6596	0.000219116	0.0029778
ENSG00000164161	HHIP	5.02539	1.79023	9.9822	0.00158061	0.0132762
ENSG00000198542	ITGBL1	5.02197	4.06362	22.5684	2.02797e-06	7.35269e-05
ENSG00000129450	SIGLEC9	5.01783	-1.56341	13.8437	0.000198665	0.00277445
ENSG00000145861	C1QTNF2	5.01777	0.268238	23.6582	1.15057e-06	4.5508e-05
ENSG00000136059	VILL	-5.0174	6.99167	19.0869	1.24899e-05	0.000320376
ENSG00000186462	NAP1L2	5.01687	2.58651	10.5173	0.00118263	0.0106938
ENSG00000118596	SLC16A7	5.01639	3.42601	8.17651	0.00424363	0.0287105
ENSG00000016402	IL20RA	-5.01468	5.99232	17.9292	2.29271e-05	0.000523942
ENSG00000123094	RASSF8	5.01373	7.44289	13.2325	0.000275133	0.00351636
ENSG00000176387	HSD11B2	-5.00795	6.36659	14.265	0.000158788	0.00231769
ENSG00000205089	CCNI2	-5.00195	4.57314	18.3415	1.84645e-05	0.000439727
ENSG00000139835	GRTP1	-4.99951	6.13256	29.5057	5.57533e-08	3.84562e-06
ENSG00000133328	PLAAT2	-4.99913	3.11195	13.9514	0.000187597	0.0026531
ENSG00000162494	LRRC38	4.99387	-0.726135	12.5453	0.000397212	0.00470007
ENSG00000103534	TMC5	-4.99061	8.27429	15.3703	8.83662e-05	0.00147433
ENSG00000170891	CYTL1	4.98706	-2.27363	16.701	4.3759e-05	0.000869951
ENSG00000144285	SCN1A	4.98681	-0.795598	12.2422	0.000467215	0.00533852
ENSG00000146674	IGFBP3	4.98416	10.5957	10.2127	0.00139478	0.0120687
ENSG00000181449	SOX2	-4.98277	6.20656	6.83694	0.00892918	0.0493439
ENSG00000157542	KCNJ6	4.97775	-0.168109	14.9755	0.000108918	0.00173346
ENSG00000124102	PI3	-4.97562	5.45136	8.1619	0.00427796	0.0288737
ENSG00000115935	WIPF1	4.97428	4.47592	9.78323	0.00176111	0.0144885
ENSG00000117020	AKT3	4.97224	6.96853	13.7419	0.00020972	0.00288959
ENSG00000128833	MYO5C	-4.97163	7.86847	29.1976	6.53604e-08	4.34916e-06
ENSG00000188906	LRRK2	4.97114	1.63198	8.92105	0.00281902	0.0211324
ENSG00000135100	HNF1A	-4.969	6.48224	29.3397	6.07396e-08	4.13907e-06
ENSG00000173838	MARCHF10	4.95522	0.128492	11.0658	0.000879352	0.00856781
ENSG00000161905	ALOX15	-4.9546	2.30057	7.01151	0.00809874	0.046137
ENSG00000160182	TFF1	-4.95364	6.77422	7.41774	0.00645839	0.0389016
ENSG00000139515	PDX1	-4.94958	5.1844	16.774	4.21056e-05	0.000844502
ENSG00000102934	PLLP	-4.94721	6.66839	17.8388	2.40435e-05	0.000543796
ENSG00000100362	PVALB	4.94669	-1.84616	8.76832	0.00306507	0.0225583
ENSG00000151917	BEND6	4.93691	3.71275	13.6334	0.0002222	0.00301378
ENSG00000131459	GFPT2	4.92995	5.51542	15.7557	7.2071e-05	0.00125426
ENSG00000105251	SHD	-4.92229	1.91107	11.4561	0.000712593	0.00734139
ENSG00000120162	MOB3B	-4.92027	5.97702	20.8309	5.01678e-06	0.000152964
ENSG00000145040	UCN2	4.91569	1.58179	26.6349	2.45769e-07	1.2637e-05
ENSG00000214402	LCNL1	4.90038	1.83171	8.07108	0.00449774	0.0300351
ENSG00000070190	DAPP1	-4.88984	5.13989	11.5472	0.00067851	0.00708054
ENSG00000147614	ATP6V0D2	4.88781	2.51203	11.64	0.000645489	0.00679477
ENSG00000134242	PTPN22	4.88762	3.47769	17.4414	2.96305e-05	0.000652101
ENSG00000162897	FCAMR	-4.88446	-0.812843	11.8814	0.000566967	0.00614912
ENSG00000163072	NOSTRIN	-4.88371	5.6629	29.8598	4.64435e-08	3.41149e-06
ENSG00000265817	FSBP	-4.88128	3.12009	17.2076	3.35097e-05	0.000716563
ENSG00000126947	ARMCX1	4.87624	3.91947	9.68251	0.00186031	0.0151285
ENSG00000128573	FOXP2	4.87275	1.82328	16.3492	5.26781e-05	0.000999823
ENSG00000186074	CD300LF	-4.87171	-1.70754	10.5408	0.00116769	0.0105968
ENSG00000133401	PDZD2	4.8641	4.9337	43.5271	4.18121e-11	9.85371e-09
ENSG00000144857	BOC	4.85083	3.16935	12.0747	0.000511098	0.0056961
ENSG00000109472	CPE	4.85045	5.8055	9.36823	0.00220779	0.0173917
ENSG00000021300	PLEKHB1	-4.84969	5.5748	10.8126	0.0010081	0.00943422
ENSG00000140968	IRF8	-4.84924	6.54744	15.7198	7.34517e-05	0.00127047
ENSG00000136960	ENPP2	4.8467	2.83511	11.7092	0.000621913	0.00661813
ENSG00000108375	RNF43	-4.84024	8.87626	13.5186	0.000236217	0.00313993
ENSG00000155754	C2CD6	4.83774	0.241678	14.3043	0.000155505	0.00228155
ENSG00000206538	VGLL3	4.83271	5.61746	8.03779	0.00458114	0.0303941
ENSG00000166073	GPR176	4.83003	6.71644	16.9189	3.90115e-05	0.00080187
ENSG00000080709	KCNN2	4.82934	-0.468493	17.6474	2.65878e-05	0.00059439
ENSG00000119938	PPP1R3C	4.82897	4.85086	9.39765	0.00217264	0.0171738
ENSG00000100253	MIOX	-4.82846	0.201248	9.06633	0.00260359	0.0199115
ENSG00000112273	HDGFL1	4.82012	-0.881387	8.09589	0.00443658	0.0297455
ENSG00000105538	RASIP1	-4.81222	3.67806	17.2573	3.26447e-05	0.000702047
ENSG00000164484	TMEM200A	4.81164	4.84159	8.80094	0.00301075	0.0222599
ENSG00000006555	TTC22	-4.81009	5.49435	8.81203	0.00299251	0.0221617
ENSG00000148516	ZEB1	4.80887	6.01165	15.1379	9.99388e-05	0.00161244
ENSG00000165474	GJB2	-4.80255	7.17638	14.9062	0.00011299	0.00178014
ENSG00000087116	ADAMTS2	4.80138	5.37422	12.4678	0.000414022	0.00486336
ENSG00000018625	ATP1A2	4.79901	0.145878	17.8936	2.33605e-05	0.00053063
ENSG00000012223	LTF	4.79384	0.769065	15.1655	9.84878e-05	0.00159156
ENSG00000105289	TJP3	-4.79276	7.58859	16.5934	4.63121e-05	0.000912688
ENSG00000172543	CTSW	4.78865	0.221469	24.537	7.2897e-07	3.14953e-05
ENSG00000224982	TMEM233	4.78524	-2.35789	10.4071	0.00125533	0.0112078
ENSG00000100385	IL2RB	4.78129	0.852671	13.5193	0.00023612	0.00313993
ENSG00000182492	BGN	4.78083	2.39195	12.5506	0.000396077	0.00469154
ENSG00000124134	KCNS1	4.77683	2.34476	13.1598	0.000286014	0.00362306
ENSG00000117595	IRF6	-4.77316	8.16215	17.4189	2.99835e-05	0.000655392
ENSG00000151474	FRMD4A	4.76972	5.45643	60.4093	7.70499e-15	6.70452e-12
ENSG00000204613	TRIM10	-4.76843	3.22373	12.2573	0.000463451	0.00530623
ENSG00000125775	SDCBP2	-4.76185	7.23777	14.9829	0.000108487	0.0017309
ENSG00000189143	CLDN4	-4.76132	10.8034	21.2929	3.94195e-06	0.000127982
ENSG00000128805	ARHGAP22	4.75904	3.01153	10.7159	0.0010622	0.00984889
ENSG00000158055	GRHL3	-4.7559	5.59319	12.2379	0.000468293	0.00534544
ENSG00000177685	CRACR2B	-4.75228	6.99895	25.1823	5.21574e-07	2.38824e-05
ENSG00000203727	SAMD5	-4.74986	6.77402	10.7692	0.00103204	0.0096086
ENSG00000249992	TMEM158	4.74383	6.09269	26.2294	3.03171e-07	1.49759e-05
ENSG00000235750	KIAA0040	-4.74273	7.57912	15.5724	7.94061e-05	0.00134871
ENSG00000100867	DHRS2	-4.73787	8.28752	9.21893	0.00239525	0.0185329
ENSG00000171649	ZIK1	4.73628	1.32519	13.9017	0.000192623	0.00270341
ENSG00000129467	ADCY4	-4.73573	2.10133	9.23311	0.00237677	0.0184404
ENSG00000112559	MDFI	-4.73466	7.05173	22.5518	2.0455e-06	7.39256e-05
ENSG00000111319	SCNN1A	-4.73336	8.19767	14.1065	0.000172745	0.00247354
ENSG00000169604	ANTXR1	4.73235	6.91965	9.356	0.00222256	0.0174141
ENSG00000121075	TBX4	-4.7297	2.61101	8.46643	0.00361761	0.0253076
ENSG00000162711	NLRP3	4.72888	2.99805	17.0335	3.67267e-05	0.000760901
ENSG00000168140	VASN	4.72854	6.11828	19.3495	1.08846e-05	0.00028701
ENSG00000136286	MYO1G	4.7249	2.27417	23.0499	1.5785e-06	5.93422e-05
ENSG00000167861	HID1	-4.72125	7.45144	15.8537	6.84316e-05	0.0012054
ENSG00000135525	MAP7	-4.71718	7.95279	28.2959	1.04117e-07	6.23162e-06
ENSG00000112769	LAMA4	4.71705	6.48479	13.6246	0.000223246	0.00301378
ENSG00000133124	IRS4	4.7165	-1.95615	13.9218	0.000190573	0.00267796
ENSG00000111817	DSE	4.7149	7.14831	34.0688	5.31978e-09	5.37298e-07
ENSG00000125798	FOXA2	-4.71415	6.75472	9.3626	0.00221458	0.0174141
ENSG00000000938	FGR	4.71371	0.168433	11.5124	0.000691348	0.0071748
ENSG00000136574	GATA4	-4.71204	7.1881	9.62782	0.00191652	0.0155298
ENSG00000101276	SLC52A3	-4.70788	6.53918	15.9549	6.4871e-05	0.00117037
ENSG00000129654	FOXJ1	-4.70775	5.51411	7.24746	0.00710012	0.0416796
ENSG00000215915	ATAD3C	-4.70609	2.88789	12.0954	0.000505451	0.00565803
ENSG00000154274	C4orf19	-4.70525	5.696	16.1934	5.7194e-05	0.00106268
ENSG00000016391	CHDH	-4.70399	6.82285	14.1077	0.000172637	0.00247354
ENSG00000181652	ATG9B	-4.70359	5.60678	8.29798	0.00396892	0.027177
ENSG00000250722	SELENOP	-4.70299	6.20414	10.6331	0.00111084	0.0101833
ENSG00000125848	FLRT3	-4.70152	5.93222	12.3566	0.000439424	0.0050722
ENSG00000143036	SLC44A3	-4.69727	6.24127	26.7869	2.27173e-07	1.20647e-05
ENSG00000054356	PTPRN	4.69422	0.3582	18.1063	2.08909e-05	0.000489271
ENSG00000240021	TEX35	-4.69029	-1.76924	10.6761	0.0010853	0.0100056
ENSG00000166145	SPINT1	-4.68879	9.61383	14.5831	0.00013411	0.00204454
ENSG00000221852	KRTAP1-5	4.68564	-0.629297	8.01248	0.00464561	0.0307497
ENSG00000125869	LAMP5	4.68561	0.616216	8.51725	0.00351795	0.0248719
ENSG00000174611	KY	4.68091	0.307343	12.7956	0.000347439	0.00421699
ENSG00000103044	HAS3	-4.6751	6.67522	13.3543	0.00025783	0.00334853
ENSG00000117013	KCNQ4	-4.66247	3.65716	12.6472	0.00037612	0.00450706
ENSG00000147573	TRIM55	4.66191	0.550991	14.6714	0.000127975	0.00197496
ENSG00000120051	CFAP58	4.65785	1.76683	29.7608	4.88764e-08	3.56703e-06
ENSG00000140030	GPR65	4.65581	3.33216	7.5409	0.00603139	0.037123
ENSG00000176406	RIMS2	4.65555	2.4798	8.49378	0.00356362	0.0251163
ENSG00000167600	CYP2S1	-4.65521	8.91449	19.2418	1.15165e-05	0.000299481
ENSG00000103089	FA2H	-4.65292	6.55389	14.9292	0.000111625	0.00176503
ENSG00000110076	NRXN2	4.64938	3.58614	11.6713	0.000634726	0.0067103
ENSG00000172915	NBEA	4.64753	4.37962	15.3346	9.00528e-05	0.00149174
ENSG00000172828	CES3	-4.6411	4.83993	15.3726	8.82591e-05	0.00147433
ENSG00000163823	CCR1	4.63899	2.15895	10.2887	0.00133844	0.0117727
ENSG00000173175	ADCY5	-4.63177	3.24638	6.90887	0.00857693	0.0481022
ENSG00000258713	C20orf141	4.61065	-2.07161	19.749	8.83093e-06	0.000242465
ENSG00000185269	NOTUM	-4.6049	5.66482	7.36699	0.00664322	0.0397013
ENSG00000178403	NEUROG2	4.60435	-0.358983	7.95957	0.00478339	0.0313679
ENSG00000183549	ACSM5	4.60394	-2.04249	9.54357	0.00200651	0.0160862
ENSG00000141854	MISP3	-4.60362	4.94374	29.0746	6.96457e-08	4.6072e-06
ENSG00000196139	AKR1C3	-4.60145	8.35888	12.8083	0.000345084	0.00419741
ENSG00000105971	CAV2	4.60035	8.87302	16.8859	3.96961e-05	0.000810546
ENSG00000019169	MARCO	4.59649	1.74351	11.4284	0.000723298	0.00743814
ENSG00000188921	HACD4	4.59566	4.02333	17.0357	3.66841e-05	0.000760901
ENSG00000101213	PTK6	-4.59133	6.58026	14.7343	0.000123773	0.0019206
ENSG00000101955	SRPX	4.58463	5.10019	16.215	5.65437e-05	0.00105548
ENSG00000163815	CLEC3B	4.58279	0.147309	11.2843	0.000781643	0.00783861
ENSG00000026559	KCNG1	4.58136	5.82503	8.6789	0.00321915	0.0233131
ENSG00000168646	AXIN2	-4.57294	8.89235	12.1903	0.000480383	0.00544676
ENSG00000187672	ERC2	4.56887	0.275503	13.3294	0.000261275	0.00338939
ENSG00000171246	NPTX1	4.56864	3.79442	7.75624	0.00535274	0.034052
ENSG00000167889	MGAT5B	4.56849	4.72563	10.633	0.00111087	0.0101833
ENSG00000162739	SLAMF6	-4.56723	-1.83481	9.58415	0.00196264	0.0158355
ENSG00000130226	DPP6	4.56564	-1.34216	11.2165	0.00081074	0.00803776
ENSG00000120217	CD274	4.56388	5.58269	40.0858	2.43047e-10	4.29585e-08
ENSG00000114450	GNB4	4.56355	5.65038	13.5654	0.000230388	0.00308786
ENSG00000176919	C8G	-4.55947	2.8024	8.97676	0.00273434	0.0206069
ENSG00000213886	UBD	-4.55242	4.24865	8.07104	0.00449783	0.0300351
ENSG00000198959	TGM2	4.55223	9.61821	19.6025	9.53437e-06	0.000256792
ENSG00000026751	SLAMF7	4.54918	4.09654	11.3584	0.000751073	0.00762669
ENSG00000128591	FLNC	4.54797	8.86033	15.8628	6.81055e-05	0.00120312
ENSG00000156006	NAT2	-4.54355	0.562264	10.9005	0.000961407	0.00912369
ENSG00000198478	SH3BGRL2	-4.54122	8.19707	31.0609	2.50063e-08	2.02051e-06
ENSG00000204936	CD177	4.54047	2.18757	15.6276	7.71186e-05	0.00131777
ENSG00000112137	PHACTR1	4.54041	2.17344	23.1861	1.47059e-06	5.65828e-05
ENSG00000240583	AQP1	4.53949	6.20658	17.6318	2.68072e-05	0.000596936
ENSG00000149596	JPH2	4.53822	4.91115	16.903	3.934e-05	0.000806184
ENSG00000135346	CGA	4.53576	4.7325	6.93078	0.00847248	0.0476819
ENSG00000173464	RNASE11	4.53553	-2.42043	6.82093	0.00900958	0.0496668
ENSG00000187173	LCE2A	4.53553	-2.42043	6.82093	0.00900958	0.0496668
ENSG00000149571	KIRREL3	4.53263	2.31679	26.8142	2.23982e-07	1.19513e-05
ENSG00000109101	FOXN1	4.53222	1.01719	12.0404	0.000520589	0.00575625
ENSG00000155066	PROM2	-4.53189	7.80366	13.3553	0.000257698	0.00334853
ENSG00000163206	SMCP	4.53153	-2.40305	7.46855	0.00627862	0.0381193
ENSG00000176092	CRYBG2	-4.52935	6.89223	13.2837	0.00026773	0.00346121
ENSG00000114200	BCHE	4.52733	2.34466	16.4853	4.90294e-05	0.00094807
ENSG00000135074	ADAM19	4.5202	5.97764	21.1333	4.28427e-06	0.000136134
ENSG00000104870	FCGRT	-4.51493	8.45217	11.2489	0.000796718	0.00795452
ENSG00000204128	C2orf72	-4.50612	6.36773	16.5141	4.82884e-05	0.000941791
ENSG00000176658	MYO1D	-4.49241	8.85134	40.016	2.51888e-10	4.38362e-08
ENSG00000067798	NAV3	4.49232	4.82854	16.711	4.35287e-05	0.000868424
ENSG00000172986	GXYLT2	4.49137	3.95324	12.4843	0.000410377	0.00483058
ENSG00000137872	SEMA6D	4.49108	2.01631	8.58229	0.00339449	0.0241956
ENSG00000143375	CGN	-4.48916	8.2753	39.361	3.52256e-10	5.61227e-08
ENSG00000123453	SARDH	4.48409	3.05151	15.6492	7.62446e-05	0.00130501
ENSG00000166682	TMPRSS5	-4.48067	3.44472	8.75438	0.00308859	0.0226724
ENSG00000243244	STON1	4.47874	3.95609	29.6452	5.18811e-08	3.73808e-06
ENSG00000109321	AREG	-4.47596	3.40142	8.31806	0.00392528	0.0269434
ENSG00000168497	CAVIN2	4.46891	3.6792	16.1813	5.75605e-05	0.00106393
ENSG00000160867	FGFR4	-4.46333	7.46519	22.0524	2.65303e-06	9.23418e-05
ENSG00000172794	RAB37	-4.45773	1.85969	11.5255	0.00068648	0.00714576
ENSG00000047936	ROS1	4.4557	2.1941	15.6881	7.46922e-05	0.00128602
ENSG00000103056	SMPD3	-4.44435	6.17938	14.2323	0.000161573	0.00235226
ENSG00000166920	C15orf48	-4.44398	5.75189	8.2516	0.00407162	0.0277626
ENSG00000198573	SPANXC	4.44111	-1.16983	7.42587	0.00642927	0.0388023
ENSG00000128165	ADM2	-4.43616	5.88911	13.2776	0.000268599	0.0034628
ENSG00000182326	C1S	4.43012	5.27236	27.8779	1.29218e-07	7.57365e-06
ENSG00000167617	CDC42EP5	-4.42934	5.3926	17.1212	3.50684e-05	0.000737506
ENSG00000083814	ZNF671	4.42454	1.75846	17.7096	2.57324e-05	0.000576992
ENSG00000148600	CDHR1	4.42367	0.491045	7.01121	0.00810008	0.046137
ENSG00000007237	GAS7	4.41323	4.5066	13.0242	0.000307491	0.00382655
ENSG00000114854	TNNC1	-4.40555	5.09503	13.2306	0.000275415	0.00351636
ENSG00000105610	KLF1	-4.40378	-1.79508	10.1018	0.00148128	0.0126248
ENSG00000225526	MKRN2OS	-4.39998	1.94291	16.4541	4.98417e-05	0.000958859
ENSG00000164619	BMPER	4.39948	2.33472	20.6631	5.47618e-06	0.000163017
ENSG00000166250	CLMP	4.39848	4.74127	10.3951	0.00126348	0.0112363
ENSG00000169085	VXN	4.39613	1.33357	32.606	1.12865e-08	1.02138e-06
ENSG00000132470	ITGB4	-4.39578	11.2144	12.0972	0.000504987	0.00565803
ENSG00000168671	UGT3A2	4.39123	-1.20833	7.26033	0.00704944	0.0414598
ENSG00000145703	IQGAP2	-4.38731	8.04974	16.4937	4.88127e-05	0.00094807
ENSG00000115414	FN1	4.38412	12.4161	10.6626	0.00109324	0.0100624
ENSG00000157388	CACNA1D	-4.38354	3.75956	7.13559	0.00755689	0.0437256
ENSG00000110375	UPK2	-4.38229	5.30526	7.10747	0.00767634	0.0441907
ENSG00000171916	LGALS9C	-4.37931	0.201016	7.66949	0.00561623	0.0353735
ENSG00000179913	B3GNT3	-4.37384	7.60707	15.5614	7.98701e-05	0.00135253
ENSG00000185101	ANO9	-4.37149	7.2363	15.2695	9.32077e-05	0.00153028
ENSG00000143412	ANXA9	-4.3699	5.27041	15.2368	9.48387e-05	0.00155031
ENSG00000120915	EPHX2	-4.3695	6.3521	10.905	0.000959076	0.0091092
ENSG00000185742	C11orf87	4.3652	-2.23947	10.4649	0.00121665	0.0109315
ENSG00000053108	FSTL4	4.36416	3.64399	10.3384	0.00130289	0.0115323
ENSG00000161040	FBXL13	4.36403	3.17272	30.0094	4.29959e-08	3.1998e-06
ENSG00000128510	CPA4	4.35826	5.52889	13.2744	0.00026906	0.0034628
ENSG00000116774	OLFML3	4.35685	4.48653	8.8102	0.00299551	0.0221617
ENSG00000153002	CPB1	4.35367	-1.89414	8.21665	0.00415078	0.0282004
ENSG00000237330	RNF223	-4.34346	4.60821	12.421	0.000424543	0.00495096
ENSG00000204131	NHSL2	4.33436	0.536585	11.3451	0.000756488	0.00766105
ENSG00000148935	GAS2	-4.33208	2.30833	7.03646	0.00798669	0.0456752
ENSG00000116833	NR5A2	-4.3317	4.43761	8.75229	0.00309213	0.0226836
ENSG00000176601	MAP3K19	4.32837	-1.74654	16.3573	5.24532e-05	0.000997228
ENSG00000118113	MMP8	4.32332	-1.43714	7.28852	0.00693965	0.0410143
ENSG00000181104	F2R	4.32304	7.03226	13.8755	0.000195323	0.00273115
ENSG00000143333	RGS16	-4.31845	4.81794	11.0874	0.000869186	0.00849916
ENSG00000179674	ARL14	-4.31781	5.44757	12.1899	0.000480493	0.00544676
ENSG00000250803	AC010255.3	4.31662	-2.43366	10.6045	0.00112813	0.0103195
ENSG00000120820	GLT8D2	4.31559	2.03928	27.5287	1.54777e-07	8.87023e-06
ENSG00000154165	GPR15	4.31484	-1.54777	7.76408	0.00532954	0.0339458
ENSG00000108846	ABCC3	-4.31451	9.55639	14.788	0.000120296	0.00187437
ENSG00000129910	CDH15	4.31255	2.04813	10.8881	0.000967833	0.00916256
ENSG00000164520	RAET1E	4.31193	2.159	14.8367	0.000117232	0.00183168
ENSG00000111816	FRK	-4.30909	7.14517	18.4828	1.71443e-05	0.000413998
ENSG00000165905	LARGE2	-4.30891	5.63993	7.02662	0.0080307	0.0458573
ENSG00000054179	ENTPD2	-4.30865	5.69108	10.5059	0.00118995	0.0107395
ENSG00000181409	AATK	-4.3063	5.81272	12.4502	0.000417952	0.00488921
ENSG00000164220	F2RL2	4.29636	1.55704	8.53487	0.00348405	0.0247095
ENSG00000146530	VWDE	4.29578	2.81128	8.6413	0.00328626	0.0236327
ENSG00000111261	MANSC1	-4.29555	7.10135	21.2816	3.96515e-06	0.000128154
ENSG00000139679	LPAR6	-4.29458	4.25593	10.8861	0.000968887	0.00916392
ENSG00000178804	H1-8	4.29308	-2.43535	6.89762	0.00863103	0.048286
ENSG00000173705	SUSD5	4.2867	4.4362	10.3044	0.0013271	0.01171
ENSG00000064042	LIMCH1	4.27766	7.54379	12.3303	0.000445661	0.00512329
ENSG00000185634	SHC4	4.27554	1.46482	19.1588	1.20279e-05	0.000310638
ENSG00000181541	MAB21L2	4.27118	-1.75711	11.7527	0.000607557	0.00648366
ENSG00000134775	FHOD3	4.27064	4.93753	26.4588	2.69226e-07	1.35959e-05
ENSG00000105357	MYH14	-4.26709	9.9794	16.6074	4.5972e-05	0.000909153
ENSG00000184347	SLIT3	4.25695	2.74472	7.82687	0.00514751	0.0330906
ENSG00000196632	WNK3	4.2552	2.39333	9.79517	0.00174971	0.0144157
ENSG00000115339	GALNT3	-4.25393	7.88465	20.9975	4.59873e-06	0.000144502
ENSG00000166793	YPEL4	4.25181	0.890528	13.7172	0.0002125	0.00291017
ENSG00000149289	ZC3H12C	4.24706	6.6438	24.3652	7.96957e-07	3.3676e-05
ENSG00000165029	ABCA1	4.24647	7.2325	28.491	9.41337e-08	5.8188e-06
ENSG00000134954	ETS1	4.23852	8.47381	33.7988	6.11165e-09	6.06448e-07
ENSG00000177508	IRX3	4.23306	3.50987	9.98739	0.00157615	0.0132561
ENSG00000173198	CYSLTR1	4.22742	-2.06708	10.343	0.0012997	0.0115131
ENSG00000187492	CDHR4	4.21915	-0.649134	15.6802	7.50065e-05	0.00128752
ENSG00000171016	PYGO1	4.2141	4.79074	9.88816	0.00166346	0.0137955
ENSG00000153132	CLGN	4.21168	5.17853	12.6685	0.000371877	0.00446569
ENSG00000180914	OXTR	4.21046	5.30541	24.2092	8.64195e-07	3.55724e-05
ENSG00000145708	CRHBP	4.19966	-1.90897	14.6373	0.000130313	0.00200558
ENSG00000219435	CATSPERZ	-4.19442	2.24756	7.90076	0.00494141	0.0321618
ENSG00000105141	CASP14	4.19425	-0.541779	8.1512	0.00430327	0.0289753
ENSG00000198771	RCSD1	4.19407	-1.08036	20.247	6.80594e-06	0.000196902
ENSG00000176009	ASCL3	4.16753	-2.32738	12.1878	0.000481022	0.00544676
ENSG00000188916	INSYN2A	4.16708	0.245828	10.068	0.00150868	0.0127577
ENSG00000169435	RASSF6	-4.15925	5.51441	9.35863	0.00221938	0.0174141
ENSG00000230601	TEX48	4.15743	-1.52971	7.67464	0.00560022	0.0352923
ENSG00000266714	MYO15B	-4.15099	7.25163	12.0044	0.000530763	0.00584046
ENSG00000188112	C6orf132	-4.15055	8.46553	20.6802	5.42748e-06	0.000162422
ENSG00000172985	SH3RF3	4.14533	4.01755	11.9291	0.000552627	0.00601667
ENSG00000196876	SCN8A	4.14279	4.71796	25.5864	4.23008e-07	1.99378e-05
ENSG00000237289	CKMT1B	-4.14256	5.28168	10.4707	0.00121281	0.0109057
ENSG00000137965	IFI44	4.13974	5.55548	19.2064	1.17321e-05	0.000304388
ENSG00000161638	ITGA5	4.13769	7.71039	14.1293	0.000170667	0.00245622
ENSG00000131435	PDLIM4	4.13745	5.13936	10.8796	0.00097229	0.00917444
ENSG00000134363	FST	4.13611	5.32494	12.6251	0.000380596	0.00454146
ENSG00000159403	C1R	4.13268	5.93411	25.9783	3.45282e-07	1.66916e-05
ENSG00000105963	ADAP1	-4.12223	8.32008	16.1101	5.97653e-05	0.00109929
ENSG00000152217	SETBP1	4.11949	3.37953	7.64466	0.00569407	0.0357047
ENSG00000118513	MYB	-4.11706	5.98628	15.8822	6.74094e-05	0.00119945
ENSG00000168280	KIF5C	4.11563	3.09087	8.29065	0.00398497	0.0272539
ENSG00000120949	TNFRSF8	4.11066	1.63553	18.0729	2.12606e-05	0.000493445
ENSG00000095932	SMIM24	-4.10597	4.87316	7.0978	0.00771787	0.0443846
ENSG00000120278	PLEKHG1	-4.10292	6.00292	20.79	5.12487e-06	0.000155422
ENSG00000127990	SGCE	4.09756	5.99809	10.0816	0.00149755	0.0126989
ENSG00000110811	P3H3	4.0916	5.87574	8.48082	0.00358911	0.0251706
ENSG00000166317	SYNPO2L	4.09151	1.07686	12.8972	0.000329073	0.00403301
ENSG00000060982	BCAT1	4.08702	8.43894	8.82265	0.00297514	0.0220832
ENSG00000106772	PRUNE2	4.08556	3.04788	14.0811	0.000175095	0.00250085
ENSG00000011028	MRC2	4.07888	8.37389	10.2111	0.00139602	0.0120687
ENSG00000111644	ACRBP	-4.07452	2.5098	11.4998	0.000696024	0.00721009
ENSG00000062038	CDH3	-4.07359	8.08986	10.6023	0.0011295	0.0103206
ENSG00000156804	FBXO32	4.07008	7.44754	32.9688	9.36513e-09	8.61287e-07
ENSG00000014257	ACP3	-4.06614	3.43341	8.44298	0.00366456	0.0255728
ENSG00000147650	LRP12	4.06531	6.16382	9.03652	0.00264638	0.0201047
ENSG00000212747	RTL8B	4.06525	3.98133	8.10476	0.00441493	0.0296502
ENSG00000141738	GRB7	-4.06519	7.01796	16.4901	4.89037e-05	0.00094807
ENSG00000174951	FUT1	-4.06434	6.0836	14.9093	0.000112808	0.00177976
ENSG00000198947	DMD	4.05907	4.9901	12.1891	0.0004807	0.00544676
ENSG00000204186	ZDBF2	4.05803	5.36125	8.27562	0.0040181	0.0274639
ENSG00000070808	CAMK2A	4.0545	-0.539407	12.1054	0.000502751	0.00564758
ENSG00000268655	AC008687.4	4.05429	-0.546501	11.2416	0.000799829	0.00797854
ENSG00000022267	FHL1	4.05161	6.51912	10.9605	0.000930755	0.00892982
ENSG00000163624	CDS1	-4.05105	7.43352	20.9595	4.69099e-06	0.000146183
ENSG00000130052	STARD8	4.04882	3.36288	14.0462	0.000178374	0.00253488
ENSG00000165807	PPP1R36	-4.04334	2.93219	12.672	0.00037118	0.00446204
ENSG00000102962	CCL22	-4.0428	-0.892309	7.54601	0.00601432	0.0370758
ENSG00000123977	DAW1	4.03844	1.70105	9.44795	0.00211385	0.0168038
ENSG00000141469	SLC14A1	4.03562	2.28653	11.3838	0.000740893	0.00756101
ENSG00000092607	TBX15	4.0344	2.26477	21.1974	4.14335e-06	0.0001324
ENSG00000100031	GGT1	-4.03297	6.31503	8.918	0.00282374	0.0211537
ENSG00000206073	SERPINB4	4.02499	2.46191	7.46916	0.00627648	0.0381193
ENSG00000169245	CXCL10	-4.02439	-0.245683	7.97194	0.00475079	0.0312811
ENSG00000144935	TRPC1	4.02351	4.5741	13.4302	0.000247608	0.00325691
ENSG00000121552	CSTA	-4.02059	4.85266	6.97773	0.00825304	0.0468197
ENSG00000241484	ARHGAP8	-4.01843	6.36014	17.5067	2.86297e-05	0.000631305
ENSG00000099957	P2RX6	4.01392	2.1457	20.1554	7.13982e-06	0.00020447
ENSG00000196090	PTPRT	4.01373	-1.7264	7.61942	0.00577431	0.036048
ENSG00000186212	SOWAHB	-4.01174	4.91204	15.0466	0.000104888	0.00168059
ENSG00000184371	CSF1	4.0082	6.76523	44.2881	2.83431e-11	7.50421e-09
ENSG00000125735	TNFSF14	4.00652	-1.25118	11.2543	0.000794388	0.00793827
ENSG00000187486	KCNJ11	-3.99576	3.67065	19.39	1.06564e-05	0.000282307
ENSG00000184731	FAM110C	-3.99568	5.44621	7.23688	0.00714209	0.0418174
ENSG00000138347	MYPN	3.99231	1.95058	10.6361	0.00110903	0.0101829
ENSG00000214491	SEC14L6	3.98966	-0.731768	13.6896	0.000215645	0.00294611
ENSG00000130528	HRC	-3.98751	-0.0727523	7.32786	0.0067894	0.0404645
ENSG00000105137	SYDE1	3.98661	5.69371	8.01407	0.00464153	0.0307406
ENSG00000149564	ESAM	-3.98438	5.59327	13.1629	0.000285545	0.00362117
ENSG00000162687	KCNT2	3.98068	-1.42191	13.7349	0.00021051	0.00288991
ENSG00000118526	TCF21	3.97649	3.08769	8.36042	0.00383481	0.0264735
ENSG00000139626	ITGB7	-3.96864	4.70951	10.119	0.0014675	0.0125381
ENSG00000117480	FAAH	-3.96331	5.89068	19.0375	1.28177e-05	0.0003273
ENSG00000149328	GLB1L2	-3.96031	8.02816	10.4458	0.00122931	0.011019
ENSG00000243414	TICAM2	3.95982	2.92259	12.8304	0.000341034	0.00415412
ENSG00000153064	BANK1	-3.95865	2.79076	6.92767	0.00848721	0.0477174
ENSG00000177409	SAMD9L	3.95822	5.77591	11.3067	0.000772293	0.00776041
ENSG00000099812	MISP	-3.958	9.0331	13.9306	0.000189686	0.00267214
ENSG00000171310	CHST11	3.95678	5.9422	10.2149	0.0013931	0.0120687
ENSG00000175294	CATSPER1	3.95641	2.14466	14.396	0.000148116	0.00221625
ENSG00000161955	TNFSF13	-3.94491	5.63079	20.1832	7.03688e-06	0.000202034
ENSG00000002746	HECW1	3.94435	1.64226	13.1365	0.000289596	0.00366432
ENSG00000086159	AQP6	-3.94309	0.9864	9.1984	0.00242227	0.0187163
ENSG00000198435	NRARP	-3.94297	6.71394	20.6041	5.64738e-06	0.000167233
ENSG00000213088	ACKR1	3.94234	-2.50722	13.7388	0.000210075	0.00288991
ENSG00000134716	CYP2J2	-3.94177	4.56358	10.3573	0.0012896	0.0114416
ENSG00000171608	PIK3CD	3.94074	5.72563	14.9333	0.000111379	0.0017646
ENSG00000171444	MCC	3.93836	4.69231	27.0213	2.01223e-07	1.09434e-05
ENSG00000123454	DBH	3.92753	-0.898944	12.9309	0.00032321	0.00397408
ENSG00000185697	MYBL1	3.92186	6.96744	26.7045	2.37071e-07	1.24491e-05
ENSG00000162390	ACOT11	-3.92111	6.50826	16.3648	5.22477e-05	0.000994994
ENSG00000166387	PPFIBP2	-3.91596	7.09682	29.3922	5.91137e-08	4.05269e-06
ENSG00000141497	ZMYND15	-3.91426	3.44795	14.4113	0.000146918	0.00220124
ENSG00000168461	RAB31	3.91153	6.92064	10.7073	0.00106713	0.00987837
ENSG00000131242	RAB11FIP4	-3.90882	7.88693	19.6727	9.19028e-06	0.000248709
ENSG00000163431	LMOD1	3.90649	0.971796	16.2709	5.49013e-05	0.00103163
ENSG00000197535	MYO5A	3.90325	6.8073	21.6381	3.29245e-06	0.000110517
ENSG00000117598	PLPPR5	3.90225	-2.25874	10.5764	0.00114543	0.0104325
ENSG00000182389	CACNB4	3.8991	2.09407	13.0068	0.000310368	0.00384188
ENSG00000125731	SH2D3A	-3.89692	6.68615	24.3389	8.07911e-07	3.38485e-05
ENSG00000108352	RAPGEFL1	-3.89227	7.19113	12.057	0.000515977	0.00573916
ENSG00000035115	SH3YL1	-3.89133	7.8116	29.525	5.51998e-08	3.8308e-06
ENSG00000162460	TMEM82	-3.89105	-0.745964	7.15292	0.0074842	0.0434606
ENSG00000180155	LYNX1	3.89007	3.93745	10.9308	0.000945801	0.0090134
ENSG00000143365	RORC	-3.88631	2.95386	9.85638	0.00169243	0.0139743
ENSG00000142235	LMTK3	-3.88568	5.04986	14.0766	0.00017551	0.00250362
ENSG00000056736	IL17RB	-3.88396	5.80487	15.1674	9.83881e-05	0.00159156
ENSG00000105699	LSR	-3.88361	10.0454	16.4716	4.9385e-05	0.000951692
ENSG00000170786	SDR16C5	-3.87969	5.2139	6.96505	0.00831171	0.047069
ENSG00000136883	KIF12	-3.87737	4.28631	9.57069	0.00197708	0.015918
ENSG00000162365	CYP4A22	3.87461	-2.36885	8.68431	0.00320961	0.0232589
ENSG00000134548	SPX	3.86583	0.482363	7.68125	0.00557976	0.0351948
ENSG00000140563	MCTP2	-3.86215	5.22872	15.1979	9.68114e-05	0.00157346
ENSG00000240764	PCDHGC5	3.85571	0.304165	15.2265	9.53548e-05	0.00155426
ENSG00000031081	ARHGAP31	3.85296	4.28803	28.0147	1.20396e-07	7.11876e-06
ENSG00000158445	KCNB1	3.84862	1.34488	7.87409	0.0050148	0.0325085
ENSG00000110318	CEP126	3.84577	4.99672	19.8958	8.17784e-06	0.000226735
ENSG00000185499	MUC1	-3.8455	8.23589	8.77299	0.00305724	0.0225153
ENSG00000149300	C11orf52	-3.84405	4.20466	12.9996	0.000311553	0.00385168
ENSG00000105219	CNTD2	-3.84389	2.34636	9.05124	0.00262517	0.0200107
ENSG00000187699	C2orf88	-3.84364	4.86813	8.31497	0.00393196	0.0269729
ENSG00000108001	EBF3	3.84047	0.915071	7.43651	0.00639136	0.038704
ENSG00000168961	LGALS9	-3.83469	6.39871	8.55714	0.00344169	0.0244858
ENSG00000101311	FERMT1	-3.83324	8.94305	15.8658	6.79953e-05	0.00120312
ENSG00000250510	GPR162	3.83089	1.55006	11.7535	0.000607275	0.00648366
ENSG00000159433	STARD9	3.82887	4.49435	24.9095	6.0087e-07	2.69724e-05
ENSG00000125637	PSD4	-3.82861	7.72678	20.284	6.67571e-06	0.00019363
ENSG00000155962	CLIC2	3.827	2.97281	16.1538	5.84024e-05	0.00107773
ENSG00000113580	NR3C1	3.82421	7.45266	13.9665	0.000186096	0.00263799
ENSG00000182963	GJC1	3.8198	5.96676	10.8158	0.00100635	0.00943422
ENSG00000177374	HIC1	3.81928	2.86154	17.272	3.23922e-05	0.000697945
ENSG00000095970	TREM2	3.81475	-2.23375	8.54491	0.0034649	0.0246045
ENSG00000172935	MRGPRF	3.81379	1.23487	22.8345	1.7657e-06	6.54872e-05
ENSG00000186603	HPDL	-3.80167	6.86683	10.604	0.00112843	0.0103195
ENSG00000100504	PYGL	3.79871	7.44214	9.76679	0.00177692	0.0145867
ENSG00000134871	COL4A2	3.79505	7.23058	14.7674	0.000121617	0.00189235
ENSG00000118194	TNNT2	-3.78997	2.27822	9.22968	0.00238123	0.0184623
ENSG00000134709	HOOK1	-3.78674	7.49067	8.7318	0.00312708	0.0228807
ENSG00000073350	LLGL2	-3.78608	9.08218	14.9699	0.000109241	0.00173558
ENSG00000136541	ERMN	-3.77676	-1.40564	7.46871	0.00627807	0.0381193
ENSG00000170703	TTLL6	-3.77408	2.88357	7.76238	0.00533455	0.0339586
ENSG00000166741	NNMT	3.77059	7.06394	8.07578	0.00448608	0.0299921
ENSG00000184922	FMNL1	3.7677	5.51548	23.2453	1.42602e-06	5.5055e-05
ENSG00000115295	CLIP4	3.76363	7.00338	19.1864	1.18554e-05	0.000306885
ENSG00000160190	SLC37A1	-3.76271	7.13577	22.8113	1.78709e-06	6.60641e-05
ENSG00000020181	ADGRA2	3.76097	4.96231	13.0871	0.00029734	0.00372481
ENSG00000121236	TRIM6	3.76068	4.74607	10.6844	0.00108043	0.00996887
ENSG00000036530	CYP46A1	3.75247	0.523638	7.64638	0.00568864	0.0356904
ENSG00000187867	PALM3	-3.75121	4.20222	9.17875	0.00244841	0.018894
ENSG00000109944	JHY	3.75008	4.00412	7.54904	0.0060042	0.0370339
ENSG00000179242	CDH4	3.74664	3.2454	16.3794	5.18468e-05	0.000990693
ENSG00000129354	AP1M2	-3.7457	8.18751	21.4734	3.58762e-06	0.000118318
ENSG00000125414	MYH2	3.73928	-1.86483	9.23532	0.00237391	0.0184308
ENSG00000115616	SLC9A2	-3.73565	6.9215	8.84349	0.00294136	0.0218899
ENSG00000171488	LRRC8C	3.73397	5.29201	23.6837	1.13543e-06	4.50665e-05
ENSG00000168917	SLC35G2	3.73199	4.24202	12.5343	0.000399545	0.0047178
ENSG00000099822	HCN2	3.73065	4.18702	12.967	0.000317034	0.00391089
ENSG00000242419	PCDHGC4	3.72557	0.669401	10.4026	0.00125837	0.0112173
ENSG00000102032	RENBP	-3.72225	1.79279	7.84588	0.00509366	0.0328691
ENSG00000154114	TBCEL	3.72204	5.57006	8.4811	0.00358856	0.0251706
ENSG00000180336	MEIOC	3.72116	2.6515	26.7429	2.32407e-07	1.2285e-05
ENSG00000065621	GSTO2	-3.71823	6.12631	13.2134	0.000277958	0.00354482
ENSG00000176014	TUBB6	3.71436	8.62045	17.2374	3.29873e-05	0.000706728
ENSG00000182489	XKRX	-3.71195	2.21279	8.42169	0.0037077	0.0257785
ENSG00000134668	SPOCD1	3.70671	4.21855	22.3131	2.31619e-06	8.21339e-05
ENSG00000204065	TCEAL5	3.70491	-2.52439	11.8311	0.000582499	0.00625164
ENSG00000181804	SLC9A9	3.70091	1.33069	17.0345	3.6707e-05	0.000760901
ENSG00000120658	ENOX1	3.69876	2.4938	8.35758	0.00384083	0.0264923
ENSG00000129991	TNNI3	-3.69811	3.43986	7.17759	0.00738199	0.0429553
ENSG00000151967	SCHIP1	3.69807	2.17653	13.5203	0.000235998	0.00313993
ENSG00000234409	CCDC188	3.69588	-0.613775	13.4141	0.000249738	0.00326971
ENSG00000181458	TMEM45A	3.69368	4.67229	12.3518	0.000440556	0.00508009
ENSG00000143786	CNIH3	3.68665	2.10522	28.6186	8.81332e-08	5.54663e-06
ENSG00000106123	EPHB6	3.68555	5.75712	7.75539	0.00535525	0.034052
ENSG00000142583	SLC2A5	3.6855	0.654917	13.3031	0.000264971	0.0034334
ENSG00000117322	CR2	3.67843	-0.197385	7.70011	0.00552175	0.034934
ENSG00000186469	GNG2	3.67819	3.49138	7.29976	0.00689638	0.0408653
ENSG00000145362	ANK2	3.67442	4.29474	10.0917	0.00148936	0.0126591
ENSG00000088320	REM1	3.67244	-2.35894	9.70461	0.00183806	0.0150015
ENSG00000124196	GTSF1L	3.67215	-2.54731	11.1181	0.000854915	0.00840209
ENSG00000137463	MGARP	3.67031	1.67961	12.6285	0.000379907	0.00453802
ENSG00000197208	SLC22A4	3.66937	2.24894	31.9216	1.60519e-08	1.3756e-06
ENSG00000054690	PLEKHH1	-3.6667	6.74607	38.7305	4.86546e-10	7.39215e-08
ENSG00000101230	ISM1	3.66341	0.465253	12.6071	0.000384282	0.00457098
ENSG00000049192	ADAMTS6	3.66228	6.12102	10.0821	0.00149716	0.0126989
ENSG00000177464	GPR4	3.66227	-0.0939358	7.14648	0.00751112	0.0435305
ENSG00000221866	PLXNA4	3.66101	0.874234	9.3939	0.00217708	0.0171738
ENSG00000109743	BST1	3.65681	2.23362	19.5723	9.68642e-06	0.000260268
ENSG00000184985	SORCS2	3.65173	3.19111	11.1997	0.000818116	0.0080967
ENSG00000160188	RSPH1	-3.65095	3.67173	11.6569	0.000639665	0.0067562
ENSG00000244588	RAD21L1	3.64782	-1.73761	7.33072	0.0067786	0.0404215
ENSG00000170915	PAQR8	-3.64652	7.75676	13.8959	0.000193223	0.00270847
ENSG00000183049	CAMK1D	3.646	4.91124	8.09503	0.00443869	0.0297455
ENSG00000164512	ANKRD55	3.6432	-1.97783	14.3278	0.000153583	0.00226331
ENSG00000182600	SNORC	-3.64199	4.8791	11.9802	0.000537695	0.00589952
ENSG00000160145	KALRN	-3.64139	7.33367	11.4029	0.000733298	0.00752589
ENSG00000169946	ZFPM2	3.6396	3.35892	10.0632	0.00151261	0.0127692
ENSG00000125965	GDF5	3.63375	-0.850255	10.9896	0.000916266	0.00884333
ENSG00000107611	CUBN	3.62566	2.1976	15.2385	9.47534e-05	0.00155031
ENSG00000033122	LRRC7	3.62085	2.87476	13.2363	0.000274583	0.00351366
ENSG00000162383	SLC1A7	3.615	1.35087	8.00048	0.00467649	0.0308998
ENSG00000113657	DPYSL3	3.61114	7.6466	7.8108	0.00519348	0.0332477
ENSG00000103067	ESRP2	-3.6053	7.74502	12.052	0.000517365	0.00574896
ENSG00000106069	CHN2	-3.60443	5.61654	9.98956	0.0015743	0.0132504
ENSG00000170293	CMTM8	-3.60167	5.57363	20.2022	6.9672e-06	0.000200646
ENSG00000136274	NACAD	3.59973	3.20016	8.23131	0.00411738	0.0280239
ENSG00000142156	COL6A1	3.59821	9.0333	13.6582	0.000219281	0.0029778
ENSG00000112699	GMDS	-3.59781	8.76007	21.12	4.31406e-06	0.000136696
ENSG00000184292	TACSTD2	-3.59559	10.1368	7.69541	0.00553614	0.0350055
ENSG00000179104	TMTC2	-3.59288	6.27606	18.0667	2.13304e-05	0.000493445
ENSG00000143512	HHIPL2	3.5917	2.94258	10.2231	0.00138692	0.0120591
ENSG00000128656	CHN1	3.58979	4.70551	12.9144	0.000326065	0.00400049
ENSG00000128606	LRRC17	3.58894	1.51048	15.7651	7.17149e-05	0.00124998
ENSG00000213462	ERV3-1	-3.58665	7.10024	10.3972	0.00126208	0.0112326
ENSG00000160838	LRRC71	3.58583	-0.554353	10.5919	0.00113586	0.0103704
ENSG00000106686	SPATA6L	-3.58556	3.43751	16.2344	5.59689e-05	0.00104821
ENSG00000012124	CD22	3.58497	3.21882	8.52888	0.00349554	0.0247444
ENSG00000197471	SPN	3.58193	1.92349	6.94087	0.00842481	0.0476031
ENSG00000157315	TMED6	-3.58104	2.49289	8.60181	0.0033583	0.0240285
ENSG00000135423	GLS2	-3.57515	5.31564	12.3632	0.000437888	0.00505964
ENSG00000147689	FAM83A	3.57496	4.83035	8.52905	0.00349523	0.0247444
ENSG00000169302	STK32A	3.5716	0.748823	12.3232	0.00044736	0.0051376
ENSG00000212122	TSSK1B	3.56894	-2.49028	7.21145	0.007244	0.0423484
ENSG00000163453	IGFBP7	3.56893	6.61412	9.04038	0.00264081	0.0200893
ENSG00000134339	SAA2	3.56751	3.53602	8.33116	0.00389708	0.026815
ENSG00000130775	THEMIS2	3.56547	3.96053	10.4005	0.00125984	0.0112215
ENSG00000177191	B3GNT8	-3.56461	2.651	7.17835	0.00737886	0.0429553
ENSG00000188015	S100A3	3.56221	2.19708	25.4731	4.48597e-07	2.09691e-05
ENSG00000096996	IL12RB1	3.56148	-0.942939	13.0847	0.000297714	0.00372538
ENSG00000143515	ATP8B2	3.56129	6.27537	13.1176	0.00029254	0.00368345
ENSG00000166963	MAP1A	3.55988	4.97194	11.3166	0.000768189	0.00773798
ENSG00000155629	PIK3AP1	-3.54891	5.56394	16.8525	4.04004e-05	0.000816088
ENSG00000143816	WNT9A	3.54614	4.30029	7.93398	0.00485151	0.0317044
ENSG00000173890	GPR160	-3.54363	6.35403	26.4066	2.7659e-07	1.38442e-05
ENSG00000138769	CDKL2	3.54223	1.82944	13.3681	0.000255944	0.00333553
ENSG00000142871	CCN1	3.54066	10.4471	12.5767	0.000390594	0.00464117
ENSG00000139547	RDH16	-3.53429	1.73608	7.66416	0.00563284	0.0354584
ENSG00000154319	FAM167A	3.53258	4.75778	11.2268	0.00080626	0.00801442
ENSG00000050165	DKK3	3.53039	8.04621	7.20398	0.0072742	0.0424653
ENSG00000182264	IZUMO1	-3.53017	1.28883	10.7793	0.00102641	0.00956408
ENSG00000253958	CLDN23	-3.52816	5.51429	11.5244	0.000686886	0.00714576
ENSG00000162641	AKNAD1	3.5279	-0.326207	8.82129	0.00297737	0.0220852
ENSG00000163435	ELF3	-3.52785	9.99181	8.62807	0.00331023	0.0237723
ENSG00000023445	BIRC3	3.5276	8.34775	15.9359	6.55253e-05	0.00117504
ENSG00000185532	PRKG1	3.52342	4.04733	7.8728	0.00501839	0.0325085
ENSG00000182557	SPNS3	-3.52155	1.71086	7.70396	0.00550997	0.034879
ENSG00000087303	NID2	3.51794	4.10234	14.9358	0.000111235	0.0017646
ENSG00000076770	MBNL3	-3.51564	7.28945	11.3598	0.000750503	0.00762669
ENSG00000161921	CXCL16	-3.51461	8.44642	14.4864	0.000141174	0.00212928
ENSG00000090530	P3H2	3.50572	7.07217	15.1123	0.000101302	0.00163005
ENSG00000130675	MNX1	-3.50492	5.02121	13.8391	0.000199151	0.0027778
ENSG00000128965	CHAC1	-3.50355	6.7068	24.8444	6.21495e-07	2.74688e-05
ENSG00000102996	MMP15	-3.49909	8.54788	28.6838	8.52137e-08	5.44597e-06
ENSG00000120471	TP53AIP1	-3.49856	-0.125746	7.90456	0.00493102	0.0321127
ENSG00000124406	ATP8A1	-3.49834	5.78076	16.3383	5.29835e-05	0.00100385
ENSG00000256660	CLEC12B	3.4943	-2.14192	7.28504	0.00695311	0.0410724
ENSG00000188626	GOLGA8M	3.4895	-1.86614	9.54196	0.00200827	0.016089
ENSG00000136383	ALPK3	-3.48723	4.38365	8.87375	0.00289301	0.0216011
ENSG00000155833	CYLC2	3.48191	-2.57576	8.44844	0.00365357	0.0255118
ENSG00000176256	HMGB4	3.48191	-2.57576	8.44844	0.00365357	0.0255118
ENSG00000189013	KIR2DL4	3.48191	-2.57576	8.44844	0.00365357	0.0255118
ENSG00000167306	MYO5B	-3.47851	8.74215	15.685	7.48144e-05	0.00128617
ENSG00000178175	ZNF366	3.47535	-2.45995	13.3699	0.000255689	0.00333553
ENSG00000166450	PRTG	3.47026	4.34091	8.39361	0.00376541	0.0260835
ENSG00000165795	NDRG2	-3.46889	7.26941	9.12657	0.00251924	0.0193467
ENSG00000119900	OGFRL1	3.46697	7.0861	9.05935	0.00261355	0.0199625
ENSG00000113946	CLDN16	-3.46284	1.2619	7.36877	0.00663662	0.0397004
ENSG00000169213	RAB3B	3.46195	7.01141	9.16201	0.00247092	0.0190532
ENSG00000165124	SVEP1	3.45911	3.38677	8.89834	0.00285429	0.0213402
ENSG00000138030	KHK	-3.45875	5.32857	21.0688	4.43082e-06	0.000139614
ENSG00000168779	SHOX2	3.45722	3.86311	9.21411	0.00240157	0.0185691
ENSG00000215845	TSTD1	-3.45246	6.17125	12.1683	0.000486098	0.00549874
ENSG00000196371	FUT4	-3.4519	7.78207	28.6158	8.82597e-08	5.54663e-06
ENSG00000167748	KLK1	-3.4514	3.8307	7.1305	0.00757837	0.0437827
ENSG00000224389	C4B	3.45082	2.61756	8.08063	0.00447409	0.0299472
ENSG00000176928	GCNT4	-3.45079	4.57316	7.82906	0.00514128	0.033082
ENSG00000174004	NRROS	3.4483	1.53927	7.84405	0.00509882	0.0328836
ENSG00000232070	TMEM253	-3.44809	3.14038	11.6544	0.000640508	0.00675879
ENSG00000131127	ZNF141	3.44406	4.72606	9.79047	0.00175418	0.014442
ENSG00000143322	ABL2	3.44304	8.42566	48.5566	3.20891e-12	1.22713e-09
ENSG00000174669	SLC29A2	-3.43874	6.50855	12.1377	0.000494134	0.00556183
ENSG00000069667	RORA	3.43761	4.70816	16.8303	4.0875e-05	0.000824203
ENSG00000181072	CHRM2	3.43664	-2.3612	11.6947	0.000626795	0.00665132
ENSG00000249715	FER1L5	3.43493	-0.602952	12.0832	0.000508778	0.00568705
ENSG00000213658	LAT	3.4271	4.34977	19.6467	9.31627e-06	0.000251517
ENSG00000172209	GPR22	3.42695	0.126432	7.62168	0.00576707	0.0360227
ENSG00000151572	ANO4	3.42188	1.00315	7.18641	0.00734579	0.0428107
ENSG00000074590	NUAK1	3.41593	6.4951	13.2488	0.000272756	0.00350036
ENSG00000120160	EQTN	-3.41404	-2.0934	7.41317	0.0064748	0.0389176
ENSG00000128340	RAC2	3.41352	6.44357	16.1964	5.71039e-05	0.00106268
ENSG00000105711	SCN1B	3.41281	3.8904	8.99741	0.00270363	0.0204162
ENSG00000102886	GDPD3	-3.41241	4.92487	11.6217	0.000651884	0.0068469
ENSG00000134755	DSC2	-3.41052	7.74573	8.66707	0.00324012	0.0234105
ENSG00000100505	TRIM9	3.40556	2.2575	8.96759	0.00274811	0.0206831
ENSG00000131015	ULBP2	3.40523	5.16166	14.3268	0.000153662	0.00226331
ENSG00000116574	RHOU	-3.39933	7.76685	10.6435	0.00110458	0.0101503
ENSG00000187994	RINL	-3.39871	5.23854	10.7523	0.0010415	0.00968073
ENSG00000188747	NOXA1	-3.39159	4.37083	11.2935	0.000777804	0.00780703
ENSG00000213214	ARHGEF35	-3.38765	4.45136	8.32443	0.00391155	0.0268818
ENSG00000127377	CRYGN	3.38724	-1.56503	9.4277	0.00213732	0.0169785
ENSG00000111490	TBC1D30	-3.38553	6.08289	19.1235	1.22524e-05	0.000315717
ENSG00000127325	BEST3	3.38141	-0.140362	7.95511	0.00479517	0.031427
ENSG00000132965	ALOX5AP	3.38127	0.906305	8.22235	0.00413776	0.0281288
ENSG00000153060	TEKT5	-3.3687	-1.01888	7.04802	0.00793529	0.0454727
ENSG00000109099	PMP22	3.36491	6.68506	10.2655	0.0013554	0.0118763
ENSG00000244731	C4A	3.36205	2.75291	13.5107	0.000237208	0.00314572
ENSG00000106025	TSPAN12	-3.36193	4.99054	10.9351	0.000943603	0.0090056
ENSG00000174607	UGT8	-3.35609	7.02052	9.57237	0.00197528	0.0159148
ENSG00000110079	MS4A4A	3.3486	-2.46507	8.75955	0.00307986	0.0226229
ENSG00000123342	MMP19	3.34743	3.82972	11.6508	0.000641736	0.00676544
ENSG00000123685	BATF3	3.3466	2.50151	9.22833	0.00238299	0.0184633
ENSG00000178826	TMEM139	-3.3451	6.77467	14.4762	0.000141938	0.00213526
ENSG00000110042	DTX4	-3.34413	8.22066	25.0563	5.56793e-07	2.51938e-05
ENSG00000128917	DLL4	-3.34348	3.07616	9.13444	0.00250842	0.0193029
ENSG00000110848	CD69	3.33972	-1.34977	9.67581	0.0018671	0.0151729
ENSG00000105928	GSDME	3.33103	5.72327	7.80364	0.00521412	0.0333244
ENSG00000178562	CD28	3.32675	-2.5924	7.9623	0.00477616	0.031365
ENSG00000168878	SFTPB	3.32492	-1.97836	7.92286	0.00488141	0.0318813
ENSG00000064205	CCN5	3.31985	0.153811	21.2239	4.08634e-06	0.000131238
ENSG00000124191	TOX2	3.3175	3.83995	7.31429	0.00684083	0.0406
ENSG00000104140	RHOV	-3.31626	5.21088	10.2983	0.00133155	0.0117309
ENSG00000143479	DYRK3	3.30529	4.60576	19.3431	1.09216e-05	0.000287314
ENSG00000182871	COL18A1	3.30529	7.93649	9.62455	0.00191994	0.0155464
ENSG00000105499	PLA2G4C	3.30454	2.63931	17.8138	2.43611e-05	0.000548949
ENSG00000214376	VSTM5	-3.29635	2.60351	7.94375	0.00482537	0.0315883
ENSG00000189157	FAM47E	-3.29498	3.49405	9.86458	0.00168491	0.0139427
ENSG00000142552	RCN3	3.29112	6.54727	10.6522	0.00109941	0.010111
ENSG00000215187	FAM166B	-3.29054	-0.0974109	9.14968	0.00248762	0.0191689
ENSG00000164418	GRIK2	3.2883	1.16385	7.11903	0.00762698	0.0439961
ENSG00000069493	CLEC2D	3.28748	2.50427	18.5764	1.63225e-05	0.000400521
ENSG00000085465	OVGP1	-3.28744	3.35282	11.7443	0.000610287	0.00650666
ENSG00000179431	FJX1	3.27859	5.56801	9.37524	0.00219936	0.0173374
ENSG00000106333	PCOLCE	3.27721	6.22672	11.187	0.00082371	0.00813782
ENSG00000149150	SLC43A1	-3.26315	7.28571	17.3091	3.17664e-05	0.000689716
ENSG00000152784	PRDM8	3.26248	2.6176	8.04813	0.00455507	0.0302589
ENSG00000165757	JCAD	3.26167	6.60637	9.96358	0.00159667	0.013369
ENSG00000124813	RUNX2	3.25603	6.3055	12.6971	0.000366218	0.00441177
ENSG00000148082	SHC3	3.25496	3.28203	8.62655	0.00331298	0.0237723
ENSG00000148926	ADM	3.25436	7.31014	11.0887	0.000868575	0.00849916
ENSG00000117069	ST6GALNAC5	3.25252	1.96887	6.8805	0.00871413	0.0485109
ENSG00000173210	ABLIM3	3.24966	6.92778	12.4932	0.000408432	0.00481269
ENSG00000173482	PTPRM	3.24687	6.12765	17.1829	3.39477e-05	0.000723196
ENSG00000205336	ADGRG1	-3.244	8.76317	14.2204	0.000162602	0.00236
ENSG00000115523	GNLY	3.24397	-1.93151	7.60537	0.00581946	0.03621
ENSG00000164695	CHMP4C	-3.24007	7.30244	12.8408	0.000339149	0.00414752
ENSG00000259224	SLC35G6	3.2314	-1.33611	10.9679	0.000927053	0.00891736
ENSG00000140092	FBLN5	3.23019	1.97506	7.02558	0.00803534	0.0458606
ENSG00000138172	CALHM2	3.22554	4.60515	20.0728	7.45509e-06	0.000211889
ENSG00000127152	BCL11B	-3.21899	4.65777	9.02528	0.00266271	0.0202151
ENSG00000182901	RGS7	3.21596	1.96726	7.41924	0.00645301	0.03889
ENSG00000023902	PLEKHO1	3.21355	4.8707	12.0388	0.000521056	0.00575625
ENSG00000023608	SNAPC1	3.21344	6.92959	36.8834	1.2541e-09	1.542e-07
ENSG00000198673	TAFA2	3.20981	1.25728	20.8897	4.86512e-06	0.000149713
ENSG00000120756	PLS1	-3.20719	8.79794	20.9471	4.72141e-06	0.000146727
ENSG00000196724	ZNF418	3.20479	0.383273	6.87919	0.00872049	0.0485225
ENSG00000163235	TGFA	-3.19776	7.89697	9.39729	0.00217306	0.0171738
ENSG00000168811	IL12A	3.19737	1.58001	11.5651	0.000672028	0.00702481
ENSG00000137880	GCHFR	-3.19561	5.45042	11.8554	0.000574929	0.00619532
ENSG00000133985	TTC9	-3.19556	6.43301	8.24918	0.00407704	0.027774
ENSG00000102554	KLF5	-3.18838	9.99887	22.8801	1.72425e-06	6.41602e-05
ENSG00000134917	ADAMTS8	3.18703	-0.304669	8.49025	0.00357055	0.0251241
ENSG00000111664	GNB3	3.18646	2.66733	13.0221	0.000307832	0.00382659
ENSG00000183760	ACP7	3.17258	2.62029	7.26941	0.00701387	0.0413449
ENSG00000049089	COL9A2	3.1723	3.81066	10.2588	0.00136033	0.0118851
ENSG00000044459	CNTLN	3.16706	5.27303	7.58662	0.00588032	0.0364853
ENSG00000197594	ENPP1	3.1669	5.98158	11.5918	0.000662436	0.00694046
ENSG00000188897	AC099489.1	-3.16184	1.68642	6.89098	0.00866318	0.048358
ENSG00000159708	LRRC36	-3.16037	1.02679	7.31553	0.00683611	0.0405932
ENSG00000168237	GLYCTK	-3.15732	6.38722	14.6382	0.000130249	0.00200558
ENSG00000084110	HAL	-3.15588	1.17714	8.69257	0.00319509	0.0232281
ENSG00000112531	QKI	3.15077	7.74415	7.06511	0.00785996	0.04511
ENSG00000103811	CTSH	-3.14964	8.7484	13.2757	0.000268867	0.0034628
ENSG00000189410	SH2D5	3.14674	3.92925	11.9854	0.00053619	0.00588872
ENSG00000155792	DEPTOR	-3.14636	5.77349	11.0771	0.000873983	0.00853756
ENSG00000178821	TMEM52	-3.14422	4.11791	10.0293	0.00154071	0.012987
ENSG00000185420	SMYD3	3.13036	7.13438	24.3631	7.97839e-07	3.3676e-05
ENSG00000149633	KIAA1755	3.12948	-0.0517619	13.6618	0.000218864	0.0029778
ENSG00000183542	KLRC4	3.12575	-2.6127	7.55818	0.00597384	0.0368865
ENSG00000139318	DUSP6	-3.12207	9.51442	13.5495	0.000232355	0.00310685
ENSG00000204257	HLA-DMA	-3.11922	5.26864	11.0133	0.000904589	0.00876088
ENSG00000057019	DCBLD2	3.11638	9.52914	12.9181	0.000325426	0.00399698
ENSG00000148344	PTGES	3.11522	7.52494	9.55478	0.00199429	0.0160337
ENSG00000100290	BIK	-3.10572	5.5608	12.3823	0.000433432	0.00501328
ENSG00000149922	TBX6	-3.10523	2.96551	7.82426	0.00515494	0.0330906
ENSG00000137707	BTG4	3.10282	-1.8173	7.56731	0.00594363	0.0367803
ENSG00000166394	CYB5R2	-3.10128	4.96424	7.8494	0.00508376	0.0328239
ENSG00000115255	REEP6	-3.08138	6.91245	10.2729	0.00134997	0.0118471
ENSG00000114480	GBE1	3.08108	7.08014	16.3748	5.19706e-05	0.000991386
ENSG00000167895	TMC8	-3.07894	4.3252	7.48332	0.00622731	0.0379339
ENSG00000076826	CAMSAP3	-3.07764	7.0399	12.0387	0.000521075	0.00575625
ENSG00000095397	WHRN	3.07433	4.19806	7.65885	0.00564944	0.0355233
ENSG00000175183	CSRP2	3.07394	4.56814	7.13288	0.00756831	0.0437469
ENSG00000113594	LIFR	3.07269	7.71929	12.047	0.000518769	0.00575479
ENSG00000184489	PTP4A3	-3.0694	5.34595	7.93674	0.00484409	0.0316925
ENSG00000115008	IL1A	3.06494	6.7262	7.72638	0.00544197	0.0345258
ENSG00000140682	TGFB1I1	3.0627	5.5627	12.6176	0.000382138	0.00455026
ENSG00000122547	EEPD1	-3.05205	7.13935	10.5088	0.00118804	0.0107341
ENSG00000167779	IGFBP6	3.04828	6.3351	11.7008	0.000624739	0.00663572
ENSG00000126861	OMG	3.04752	0.189678	8.82871	0.00296528	0.0220245
ENSG00000197837	H4-16	3.04425	4.22948	10.7396	0.00104869	0.00973956
ENSG00000198682	PAPSS2	3.04243	7.29784	10.0891	0.00149147	0.0126663
ENSG00000213578	CPLX3	-3.04043	-1.45377	6.89055	0.00866528	0.048358
ENSG00000153234	NR4A2	-3.03947	4.77383	11.9507	0.000546265	0.00596462
ENSG00000112812	PRSS16	-3.03833	5.40546	14.8827	0.000114405	0.0017986
ENSG00000026297	RNASET2	-3.0305	7.8187	26.3443	2.85655e-07	1.41862e-05
ENSG00000165475	CRYL1	-3.02216	6.85129	13.5758	0.000229124	0.00307488
ENSG00000099250	NRP1	3.01805	7.82104	17.1405	3.47147e-05	0.000735189
ENSG00000139574	NPFF	-3.01498	-0.496746	8.267	0.00403722	0.0275779
ENSG00000131781	FMO5	-3.0146	3.97662	9.41178	0.00215596	0.0171145
ENSG00000104826	LHB	3.01033	-0.252884	11.346	0.000756125	0.00766105
ENSG00000197409	H3C4	3.00328	4.87431	7.52839	0.00607343	0.0372819
ENSG00000197603	CPLANE1	2.9995	6.81779	9.35982	0.00221794	0.0174141
ENSG00000070371	CLTCL1	2.99756	5.02222	15.0696	0.00010362	0.00166264
ENSG00000099282	TSPAN15	-2.99498	7.94791	14.5909	0.000133558	0.00204164
ENSG00000170439	METTL7B	-2.99126	6.26956	9.68308	0.00185973	0.0151285
ENSG00000182240	BACE2	-2.99002	9.1357	9.35441	0.00222449	0.0174141
ENSG00000167880	EVPL	-2.98493	8.69141	10.9457	0.000938225	0.00897692
ENSG00000184574	LPAR5	-2.98451	5.38553	7.63723	0.00571756	0.0358322
ENSG00000120149	MSX2	-2.98269	7.25825	8.69002	0.00319957	0.0232355
ENSG00000183775	KCTD16	2.97792	-0.331125	8.66664	0.00324088	0.0234105
ENSG00000189283	FHIT	-2.97357	2.99273	7.22864	0.00717497	0.0419882
ENSG00000144290	SLC4A10	2.96838	-1.27068	8.26041	0.0040519	0.0276448
ENSG00000170684	ZNF296	-2.96415	4.02184	13.4857	0.000240383	0.00318409
ENSG00000121406	ZNF549	2.9624	3.80827	7.14748	0.00750693	0.0435305
ENSG00000167723	TRPV3	2.95934	4.53071	7.77968	0.00528372	0.0336919
ENSG00000143507	DUSP10	2.95877	6.72559	37.0089	1.17589e-09	1.47796e-07
ENSG00000178404	CEP295NL	2.95301	0.0192398	11.4442	0.000717167	0.0073818
ENSG00000142765	SYTL1	-2.94953	6.74933	10.7038	0.00106915	0.00988902
ENSG00000118257	NRP2	2.94948	7.3362	7.16911	0.00741695	0.0431365
ENSG00000182809	CRIP2	2.94632	7.44457	7.81601	0.00517853	0.0331895
ENSG00000196208	GREB1	2.94503	2.80357	9.00231	0.00269638	0.020375
ENSG00000110427	KIAA1549L	2.93509	6.00887	6.86552	0.00878746	0.0487751
ENSG00000106976	DNM1	2.92857	5.44823	14.849	0.000116467	0.00182224
ENSG00000126562	WNK4	2.92853	4.82255	12.413	0.000426359	0.00496191
ENSG00000167077	MEI1	2.92832	0.27549	10.959	0.000931505	0.00892982
ENSG00000205413	SAMD9	2.92826	7.44818	16.0378	6.20906e-05	0.00112559
ENSG00000134369	NAV1	2.9277	6.82101	13.515	0.000236668	0.00314223
ENSG00000175592	FOSL1	2.9271	8.5529	24.8322	6.25428e-07	2.75286e-05
ENSG00000129514	FOXA1	-2.92603	7.03739	9.07373	0.00259308	0.0198598
ENSG00000165410	CFL2	2.91653	7.30317	21.392	3.74331e-06	0.00012203
ENSG00000124126	PREX1	2.91502	5.40884	8.78537	0.00303657	0.0224068
ENSG00000129007	CALML4	-2.91384	7.20531	12.8385	0.000339555	0.004148
ENSG00000163565	IFI16	2.9117	7.49852	7.15528	0.00747438	0.0434259
ENSG00000198892	SHISA4	2.90728	4.16837	8.67337	0.00322894	0.023369
ENSG00000152939	MARVELD2	-2.90723	6.75444	14.6138	0.000131941	0.00202285
ENSG00000115963	RND3	2.90488	8.9022	32.9899	9.26381e-09	8.58953e-07
ENSG00000106952	TNFSF8	2.90486	-1.79939	7.14544	0.00751548	0.0435305
ENSG00000165046	LETM2	2.90122	4.06367	22.0248	2.69144e-06	9.33915e-05
ENSG00000137843	PAK6	-2.90067	5.79952	6.93572	0.00844912	0.047654
ENSG00000159314	ARHGAP27	-2.89981	8.14411	16.2586	5.52577e-05	0.00103661
ENSG00000178814	OPLAH	-2.89675	7.37084	10.1544	0.00143959	0.0123684
ENSG00000128886	ELL3	-2.89508	4.54663	14.869	0.000115242	0.00180807
ENSG00000175984	DENND2C	2.88951	3.41303	9.93191	0.00162437	0.0135408
ENSG00000166025	AMOTL1	2.88705	7.89479	11.038	0.000892627	0.00867474
ENSG00000186642	PDE2A	2.88266	2.53893	7.98333	0.004721	0.0311431
ENSG00000110799	VWF	2.8803	0.572246	15.2873	9.23347e-05	0.00152036
ENSG00000114993	RTKN	-2.88011	7.5177	43.5949	4.03899e-11	9.72107e-09
ENSG00000205189	ZBTB10	2.87634	6.88596	6.83708	0.00892849	0.0493439
ENSG00000197415	VEPH1	2.87514	4.4933	8.70727	0.00316944	0.0231307
ENSG00000158856	DMTN	-2.87477	6.87077	10.2171	0.00139141	0.0120687
ENSG00000100314	CABP7	2.87387	0.721316	13.4757	0.00024167	0.00319186
ENSG00000188559	RALGAPA2	-2.87372	7.83745	25.7254	3.93608e-07	1.87869e-05
ENSG00000111679	PTPN6	-2.85865	6.41572	11.8651	0.000571964	0.00619144
ENSG00000164050	PLXNB1	-2.85769	8.46344	14.258	0.000159379	0.00232332
ENSG00000163171	CDC42EP3	2.85438	7.60424	9.97102	0.00159023	0.013325
ENSG00000106537	TSPAN13	-2.85245	8.75468	16.919	3.90102e-05	0.00080187
ENSG00000167363	FN3K	-2.85045	5.2497	7.42522	0.00643161	0.0388023
ENSG00000026652	AGPAT4	2.8483	4.61897	11.0333	0.000894905	0.00868196
ENSG00000133805	AMPD3	2.84095	4.51506	11.3693	0.000746668	0.00760244
ENSG00000253159	PCDHGA12	2.83939	0.47255	11.7409	0.000611416	0.00651256
ENSG00000136237	RAPGEF5	-2.83751	5.90835	18.7959	1.45478e-05	0.00036489
ENSG00000156265	MAP3K7CL	2.82991	3.60938	6.89387	0.00864919	0.0483391
ENSG00000136014	USP44	2.82891	0.169016	7.5585	0.00597277	0.0368865
ENSG00000072195	SPEG	2.82682	5.49171	10.375	0.00127731	0.0113503
ENSG00000171368	TPPP	2.82272	6.77941	9.89477	0.00165749	0.0137662
ENSG00000172602	RND1	-2.82072	3.51752	8.62595	0.00331408	0.0237723
ENSG00000086619	ERO1B	2.81004	4.85562	9.35998	0.00221774	0.0174141
ENSG00000166257	SCN3B	2.80915	1.2296	6.86825	0.00877407	0.0487247
ENSG00000187905	LRRC74B	2.80726	-2.05147	10.4735	0.00121097	0.0108977
ENSG00000114757	PEX5L	2.80726	-0.0903986	13.4481	0.000245259	0.00322977
ENSG00000149260	CAPN5	-2.80428	7.97446	10.9205	0.000951064	0.0090483
ENSG00000170190	SLC16A5	-2.80145	7.27857	6.97594	0.00826126	0.0468428
ENSG00000169902	TPST1	2.7997	5.6831	6.9345	0.00845488	0.047654
ENSG00000165424	ZCCHC24	2.79883	5.44325	11.9567	0.000544501	0.00595686
ENSG00000160588	MPZL3	-2.79869	6.81426	9.7681	0.00177566	0.0145867
ENSG00000105376	ICAM5	2.7917	3.90183	8.06401	0.0045153	0.030134
ENSG00000170537	TMC7	-2.79002	6.16033	12.4296	0.000422589	0.00493326
ENSG00000180921	FAM83H	-2.78896	9.33211	9.31419	0.00227385	0.017727
ENSG00000102781	KATNAL1	2.78877	5.67473	9.32099	0.00226544	0.0176736
ENSG00000141655	TNFRSF11A	-2.78166	6.76299	11.8388	0.000580091	0.00623763
ENSG00000156711	MAPK13	-2.7797	7.67117	10.54	0.00116816	0.0105968
ENSG00000172458	IL17D	-2.77839	5.12038	17.3653	3.08413e-05	0.000672209
ENSG00000161267	BDH1	-2.77593	7.22265	6.98703	0.00821023	0.046647
ENSG00000076944	STXBP2	-2.77557	7.74482	14.8815	0.000114479	0.0017986
ENSG00000168116	KIAA1586	2.77394	5.70351	11.129	0.000849865	0.00835972
ENSG00000112186	CAP2	2.77119	6.15441	11.489	0.000700085	0.00724553
ENSG00000118557	PMFBP1	-2.76999	2.22561	7.59	0.0058693	0.0364599
ENSG00000187800	PEAR1	2.76757	4.34741	8.08645	0.00445975	0.0298689
ENSG00000174514	MFSD4A	-2.75953	3.52231	9.92711	0.00162862	0.0135662
ENSG00000161791	FMNL3	2.75338	6.3544	16.185	5.74472e-05	0.00106393
ENSG00000163694	RBM47	-2.7522	8.72354	13.457	0.000244088	0.00321809
ENSG00000159261	CLDN14	2.75148	-1.26465	8.76121	0.00307705	0.022617
ENSG00000135540	NHSL1	-2.75044	7.01069	14.3693	0.000150234	0.00223317
ENSG00000119514	GALNT12	-2.75014	6.79685	15.9453	6.51979e-05	0.00117253
ENSG00000085871	MGST2	-2.74381	6.94143	11.9516	0.000545994	0.00596462
ENSG00000214063	TSPAN4	2.74002	6.88699	15.9275	6.58162e-05	0.00117803
ENSG00000136040	PLXNC1	2.73995	2.8832	15.6489	7.62564e-05	0.00130501
ENSG00000117525	F3	2.73986	9.64143	11.4044	0.000732691	0.00752589
ENSG00000005073	HOXA11	-2.73901	4.94591	6.80898	0.00907006	0.049924
ENSG00000135318	NT5E	2.73438	8.47414	8.18171	0.00423149	0.0286455
ENSG00000257594	GALNT4	-2.73317	6.93703	14.5861	0.000133899	0.00204408
ENSG00000158163	DZIP1L	2.72927	3.61028	7.77338	0.00530216	0.0337904
ENSG00000140859	KIFC3	2.72764	7.21571	17.7077	2.57586e-05	0.000576992
ENSG00000100503	NIN	2.72625	7.60073	19.7266	8.93502e-06	0.000243549
ENSG00000167799	NUDT8	-2.72229	5.149	14.3895	0.000148628	0.00222098
ENSG00000169379	ARL13B	2.72098	6.07001	15.9707	6.43317e-05	0.00116435
ENSG00000092853	CLSPN	2.71929	7.37169	14.6272	0.000131012	0.0020136
ENSG00000085831	TTC39A	-2.71758	5.839	8.06184	0.00452074	0.0301483
ENSG00000151014	NOCT	2.71647	5.61644	19.3812	1.07057e-05	0.000282951
ENSG00000141668	CBLN2	2.71361	-2.48463	7.42823	0.00642086	0.0387977
ENSG00000108387	SEPTIN4	2.71029	2.07675	8.17331	0.00425111	0.0287439
ENSG00000136828	RALGPS1	-2.69428	6.11397	13.5293	0.000234864	0.003133
ENSG00000131018	SYNE1	2.69288	5.14335	7.81291	0.00518742	0.0332277
ENSG00000063015	SEZ6	2.6928	-1.07163	7.29038	0.0069325	0.0410143
ENSG00000057252	SOAT1	2.69242	7.52362	8.99088	0.0027133	0.0204755
ENSG00000166897	ELFN2	2.69093	5.66927	7.97697	0.00473762	0.0312126
ENSG00000103522	IL21R	2.69039	-0.863153	12.8297	0.000341158	0.00415412
ENSG00000073711	PPP2R3A	2.68246	5.79605	19.8254	8.48472e-06	0.000234668
ENSG00000136379	ABHD17C	-2.68244	8.16278	20.0059	7.7202e-06	0.000217783
ENSG00000170921	TANC2	2.68007	7.04409	10.6682	0.00108992	0.01004
ENSG00000170667	RASA4B	2.67966	0.643246	12.4177	0.000425282	0.00495447
ENSG00000157087	ATP2B2	2.678	-1.25874	8.43927	0.00367204	0.0256054
ENSG00000158769	F11R	-2.67089	9.38684	13.0879	0.000297212	0.00372481
ENSG00000120875	DUSP4	-2.66819	9.41475	7.24365	0.00711522	0.0417033
ENSG00000150938	CRIM1	2.66495	8.86965	35.0099	3.28029e-09	3.40427e-07
ENSG00000150995	ITPR1	2.66289	5.26789	11.2205	0.000808977	0.00802732
ENSG00000125246	CLYBL	-2.65536	4.14339	11.9189	0.000555675	0.00604403
ENSG00000162878	PKDCC	-2.6524	7.72627	7.63085	0.00573783	0.0358995
ENSG00000118307	CASC1	2.65187	1.35613	9.74254	0.00180051	0.014759
ENSG00000119681	LTBP2	2.64997	5.64064	10.1539	0.00143999	0.0123684
ENSG00000100055	CYTH4	2.64889	0.200153	9.39593	0.00217468	0.0171738
ENSG00000177363	LRRN4CL	2.63959	-0.33331	10.4833	0.00120459	0.010849
ENSG00000187391	MAGI2	2.63627	2.95247	7.61425	0.00579087	0.0360865
ENSG00000080031	PTPRH	-2.63108	6.92509	9.3402	0.00224181	0.0175254
ENSG00000035862	TIMP2	2.63077	9.41997	10.0641	0.00151189	0.0127692
ENSG00000018408	WWTR1	2.62549	6.75565	9.47604	0.00208172	0.0165718
ENSG00000162337	LRP5	-2.62516	9.55041	9.94197	0.00161553	0.0134963
ENSG00000105976	MET	2.62463	10.7503	14.5569	0.00013599	0.00207041
ENSG00000106823	ECM2	2.62274	1.35749	8.61919	0.0033264	0.0238304
ENSG00000141542	RAB40B	-2.61929	6.51427	20.7784	5.15619e-06	0.000155954
ENSG00000121653	MAPK8IP1	2.61599	4.78703	9.68742	0.00185534	0.0151208
ENSG00000108370	RGS9	2.6159	1.48438	8.73752	0.00311729	0.0228238
ENSG00000273045	C2orf15	-2.61174	3.9156	11.5291	0.000685153	0.00714327
ENSG00000187098	MITF	2.60928	4.8098	11.8558	0.000574834	0.00619532
ENSG00000152926	ZNF117	-2.60778	6.75683	8.64968	0.00327119	0.0235477
ENSG00000135299	ANKRD6	2.60728	4.05194	8.31313	0.00393595	0.0269839
ENSG00000136918	WDR38	2.60524	-1.40106	9.12439	0.00252224	0.0193566
ENSG00000151835	SACS	2.60176	7.53244	8.39231	0.00376813	0.0260863
ENSG00000090776	EFNB1	-2.59821	8.26958	13.2742	0.000269077	0.0034628
ENSG00000083807	SLC27A5	-2.59504	4.72882	12.7251	0.000360784	0.00436024
ENSG00000134317	GRHL1	-2.59237	6.59016	7.81617	0.00517807	0.0331895
ENSG00000152104	PTPN14	2.59166	8.3313	24.1287	9.0107e-07	3.66651e-05
ENSG00000133640	LRRIQ1	2.59107	0.845286	6.85625	0.00883316	0.0489807
ENSG00000058085	LAMC2	-2.58965	9.69764	8.9063	0.00284189	0.0212756
ENSG00000050327	ARHGEF5	-2.58112	5.9666	7.689	0.00555586	0.0350909
ENSG00000111077	TNS2	2.57786	5.70638	15.5136	8.19144e-05	0.00138301
ENSG00000168952	STXBP6	-2.57424	5.61031	7.96852	0.00475979	0.0313222
ENSG00000149639	SOGA1	2.5731	7.48777	12.0962	0.000505234	0.00565803
ENSG00000126091	ST3GAL3	2.5731	4.52419	18.112	2.08285e-05	0.000488821
ENSG00000134250	NOTCH2	2.57173	9.29219	22.7374	1.8572e-06	6.79892e-05
ENSG00000184992	BRI3BP	-2.56935	9.32191	8.4859	0.00357909	0.0251626
ENSG00000005961	ITGA2B	2.56756	1.38744	7.04713	0.00793922	0.0454727
ENSG00000134627	PIWIL4	-2.56532	4.7172	7.57127	0.00593061	0.0367399
ENSG00000111727	HCFC2	2.5644	5.44407	24.8708	6.13049e-07	2.73024e-05
ENSG00000197822	OCLN	-2.55601	7.30079	18.1586	2.03249e-05	0.00047899
ENSG00000100625	SIX4	2.55509	6.06206	10.2987	0.00133121	0.0117309
ENSG00000137266	SLC22A23	-2.55102	7.21671	9.0488	0.00262868	0.020024
ENSG00000165972	CCDC38	2.54585	-0.674108	9.40013	0.0021697	0.0171738
ENSG00000110628	SLC22A18	-2.54514	6.76769	9.00875	0.00268691	0.020317
ENSG00000153814	JAZF1	2.53389	4.71196	8.62905	0.00330845	0.0237723
ENSG00000164056	SPRY1	-2.53296	6.42026	12.1192	0.00049904	0.00561148
ENSG00000163347	CLDN1	-2.52964	8.60483	7.62887	0.00574411	0.035919
ENSG00000184307	ZDHHC23	-2.52742	6.21922	17.1074	3.53246e-05	0.000739985
ENSG00000118503	TNFAIP3	2.52679	6.8683	21.2522	4.0265e-06	0.000129766
ENSG00000129422	MTUS1	-2.52513	8.22722	8.98578	0.00272088	0.0205191
ENSG00000137825	ITPKA	-2.51617	5.44797	9.72698	0.00181583	0.0148523
ENSG00000082458	DLG3	-2.51342	8.2282	15.3854	8.76637e-05	0.00146694
ENSG00000145623	OSMR	2.50965	8.25369	11.8084	0.000589655	0.00631646
ENSG00000173809	TDRD12	2.5016	0.135008	7.87948	0.0049999	0.0324491
ENSG00000182197	EXT1	2.49883	8.50993	31.2394	2.28093e-08	1.89719e-06
ENSG00000213471	TTLL13P	-2.49768	-0.295074	6.90153	0.0086122	0.0482522
ENSG00000106789	CORO2A	-2.49532	7.8358	11.1539	0.000838565	0.00827014
ENSG00000125398	SOX9	-2.49277	9.10226	9.00878	0.00268686	0.020317
ENSG00000214530	STARD10	-2.48605	8.78785	10.2033	0.00140187	0.0121053
ENSG00000151914	DST	2.48214	9.6898	24.6663	6.8166e-07	2.9772e-05
ENSG00000178078	STAP2	-2.48153	7.09641	10.9632	0.000929381	0.00892982
ENSG00000100889	PCK2	-2.48134	8.80402	11.1106	0.000858341	0.0084233
ENSG00000076864	RAP1GAP	-2.47956	6.51747	8.47454	0.00360151	0.0252149
ENSG00000141934	PLPP2	-2.47622	7.87976	15.4626	8.41518e-05	0.00141656
ENSG00000129680	MAP7D3	2.47401	6.6652	6.96463	0.00831364	0.047069
ENSG00000123358	NR4A1	-2.47079	7.6454	7.11557	0.00764171	0.0440362
ENSG00000243989	ACY1	-2.46936	7.61845	11.4642	0.000709482	0.00732268
ENSG00000165338	HECTD2	2.46472	4.5579	7.82346	0.00515725	0.0330906
ENSG00000112210	RAB23	2.46379	6.56507	23.5689	1.2052e-06	4.73376e-05
ENSG00000170464	DNAJC18	2.46237	4.80997	11.2644	0.000790098	0.00790238
ENSG00000179361	ARID3B	-2.45853	6.34075	7.71679	0.00547096	0.0346903
ENSG00000183496	MEX3B	2.45752	3.74451	9.01417	0.00267895	0.0203112
ENSG00000112379	ARFGEF3	-2.45612	7.56324	11.3828	0.000741263	0.00756101
ENSG00000100092	SH3BP1	-2.45042	7.14335	10.8238	0.00100202	0.00941434
ENSG00000188732	FAM221A	-2.44975	4.73423	7.31739	0.00682907	0.0405747
ENSG00000130475	FCHO1	-2.43208	5.1604	8.68731	0.00320433	0.0232355
ENSG00000184363	PKP3	-2.42883	8.87562	9.85732	0.00169157	0.0139743
ENSG00000076641	PAG1	2.42709	6.45064	7.42827	0.00642069	0.0387977
ENSG00000095203	EPB41L4B	-2.42708	7.95916	10.5589	0.0011563	0.0105115
ENSG00000176244	ACBD7	2.42472	3.02411	7.4794	0.00624088	0.0379962
ENSG00000071794	HLTF	2.41703	8.12312	8.59482	0.00337121	0.0240904
ENSG00000109436	TBC1D9	2.41627	6.49319	6.85278	0.00885035	0.049028
ENSG00000156453	PCDH1	-2.41574	8.75917	6.98185	0.00823404	0.0467353
ENSG00000128881	TTBK2	2.41295	6.4284	21.7461	3.11226e-06	0.000104779
ENSG00000155016	CYP2U1	2.41147	4.70195	7.9622	0.00477644	0.031365
ENSG00000118263	KLF7	2.40498	6.15249	6.91354	0.00855453	0.0480243
ENSG00000171617	ENC1	-2.4044	10.1155	7.6243	0.00575871	0.0359903
ENSG00000088543	C3orf18	2.40209	3.30205	13.2449	0.000273327	0.00350156
ENSG00000111860	CEP85L	2.4006	4.68206	8.7751	0.00305371	0.0225039
ENSG00000111752	PHC1	2.3991	5.26434	7.73589	0.0054134	0.0343638
ENSG00000122591	FAM126A	2.39838	7.4074	9.35017	0.00222965	0.0174424
ENSG00000143590	EFNA3	-2.39539	5.68816	8.7906	0.00302787	0.0223572
ENSG00000169239	CA5B	2.39366	5.36537	12.8306	0.00034099	0.00415412
ENSG00000118640	VAMP8	-2.39013	7.786	9.9407	0.00161664	0.0134963
ENSG00000182534	MXRA7	2.38925	7.44867	8.49436	0.00356249	0.0251163
ENSG00000198246	SLC29A3	-2.38391	6.16471	7.295	0.00691467	0.0409308
ENSG00000124875	CXCL6	2.38127	-0.738628	6.90495	0.00859573	0.0481838
ENSG00000115355	CCDC88A	2.37721	7.19281	10.6869	0.00107895	0.0099633
ENSG00000069869	NEDD4	2.37372	7.86034	13.7565	0.000208096	0.00287463
ENSG00000105755	ETHE1	-2.36728	7.61902	12.4545	0.000416995	0.00488813
ENSG00000116678	LEPR	2.36334	5.38302	10.8624	0.000981391	0.00924354
ENSG00000185614	INKA1	2.36302	0.675387	11.5233	0.000687287	0.00714576
ENSG00000114473	IQCG	2.36205	4.99156	18.4539	1.74062e-05	0.000418045
ENSG00000125730	C3	2.3607	7.90667	6.82647	0.00898164	0.0495853
ENSG00000075391	RASAL2	2.35123	7.77709	33.8498	5.95367e-09	5.95999e-07
ENSG00000182957	SPATA13	-2.34806	7.24569	9.9502	0.00160832	0.0134467
ENSG00000170271	FAXDC2	2.33563	2.74342	7.8696	0.00502727	0.0325334
ENSG00000020577	SAMD4A	2.33438	6.86931	8.53789	0.00347828	0.024684
ENSG00000130762	ARHGEF16	-2.32652	7.48835	8.32943	0.0039008	0.0268242
ENSG00000137693	YAP1	2.32553	10.5641	18.2677	1.91937e-05	0.000454225
ENSG00000039560	RAI14	2.32445	8.16557	14.5398	0.000137229	0.00208647
ENSG00000136114	THSD1	2.32285	3.03112	8.40479	0.00374233	0.0259554
ENSG00000105327	BBC3	-2.31937	6.58411	10.2839	0.00134197	0.011786
ENSG00000139832	RAB20	-2.31469	6.63488	13.6095	0.000225042	0.00303319
ENSG00000142920	AZIN2	2.30862	2.68172	8.34385	0.00386996	0.0266608
ENSG00000159423	ALDH4A1	-2.30516	7.49168	9.02026	0.00267003	0.0202571
ENSG00000010818	HIVEP2	2.30334	7.43769	21.1807	4.1796e-06	0.000133182
ENSG00000181274	FRAT2	-2.30217	6.54947	19.9258	8.05079e-06	0.000223761
ENSG00000132846	ZBED3	-2.29958	6.41696	11.0358	0.000893671	0.00867743
ENSG00000119714	GPR68	2.29914	1.81286	7.82577	0.00515066	0.0330906
ENSG00000166123	GPT2	-2.29716	8.65134	17.3347	3.13417e-05	0.000681802
ENSG00000258818	RNASE4	-2.29691	5.87233	7.61269	0.0057959	0.0360865
ENSG00000187123	LYPD6	2.29438	5.71934	7.51749	0.00611029	0.0373279
ENSG00000099219	ERMP1	-2.28495	8.38234	17.2493	3.27826e-05	0.000703676
ENSG00000137094	DNAJB5	2.28431	4.51333	10.1211	0.00146584	0.0125381
ENSG00000164949	GEM	2.2831	5.94594	7.41411	0.00647144	0.0389176
ENSG00000134278	SPIRE1	2.28211	7.13161	11.2325	0.000803781	0.00799945
ENSG00000073605	GSDMB	-2.27637	6.35638	9.51735	0.00203538	0.01626
ENSG00000088726	TMEM40	2.27437	3.95625	7.52068	0.00609946	0.0372957
ENSG00000064547	LPAR2	-2.26744	6.04324	13.0064	0.000310421	0.00384188
ENSG00000164976	MYORG	-2.26667	7.35664	8.36596	0.00382315	0.0264187
ENSG00000185909	KLHDC8B	2.26515	4.79422	6.83441	0.00894182	0.0493896
ENSG00000136098	NEK3	-2.26496	5.59283	7.49481	0.00618772	0.0377334
ENSG00000196754	S100A2	2.26431	5.67087	7.06337	0.00786758	0.0451309
ENSG00000167081	PBX3	2.26078	6.29049	15.1355	0.000100065	0.00161244
ENSG00000115884	SDC1	-2.25188	9.75133	12.1989	0.000478171	0.00544172
ENSG00000164440	TXLNB	2.25091	-1.71848	7.26128	0.0070457	0.0414598
ENSG00000164983	TMEM65	2.25022	6.56475	12.3865	0.000432457	0.00501225
ENSG00000163251	FZD5	-2.2501	7.30239	19.6954	9.08177e-06	0.000246954
ENSG00000146112	PPP1R18	2.25	8.1158	12.6435	0.000376875	0.00451133
ENSG00000213901	SLC23A3	-2.24752	3.18053	8.16989	0.00425914	0.028764
ENSG00000130529	TRPM4	-2.2455	7.45645	9.62902	0.00191527	0.0155298
ENSG00000067606	PRKCZ	-2.24465	7.27524	8.41649	0.00371834	0.0258365
ENSG00000048471	SNX29	2.23829	5.96225	19.3099	1.11128e-05	0.00029099
ENSG00000146426	TIAM2	2.23767	4.76837	18.041	2.16195e-05	0.000499101
ENSG00000131979	GCH1	-2.23766	6.3466	18.6703	1.55381e-05	0.000385454
ENSG00000121039	RDH10	-2.23713	8.15117	11.1295	0.000849656	0.00835972
ENSG00000204991	SPIRE2	-2.23551	7.18502	10.9445	0.0009388	0.00897692
ENSG00000143067	ZNF697	2.23499	5.98663	14.3555	0.000151333	0.00224657
ENSG00000142530	FAM71E1	-2.23461	2.66483	7.36683	0.00664379	0.0397013
ENSG00000141448	GATA6	-2.23352	8.00438	9.8744	0.00167595	0.0138787
ENSG00000004700	RECQL	2.23328	7.7815	21.9412	2.81134e-06	9.66622e-05
ENSG00000062282	DGAT2	-2.23294	7.24199	7.52577	0.00608227	0.0372819
ENSG00000033867	SLC4A7	2.23279	7.6912	14.2165	0.000162939	0.00236
ENSG00000157470	FAM81A	-2.2278	5.72202	6.89301	0.00865335	0.0483391
ENSG00000177034	MTX3	2.22457	5.6141	9.53897	0.00201154	0.0161037
ENSG00000112200	ZNF451	2.21866	8.312	17.9025	2.32513e-05	0.000529214
ENSG00000141441	GAREM1	-2.21096	5.96935	14.1127	0.000172178	0.00247167
ENSG00000091490	SEL1L3	-2.21062	9.19519	8.48241	0.00358597	0.0251706
ENSG00000213949	ITGA1	2.20585	4.38937	7.82424	0.005155	0.0330906
ENSG00000203722	RAET1G	2.20358	1.85208	6.93259	0.0084639	0.0476611
ENSG00000108797	CNTNAP1	2.17279	5.37849	7.28146	0.00696699	0.0411329
ENSG00000065308	TRAM2	2.17186	8.40992	28.4701	9.51591e-08	5.85021e-06
ENSG00000162804	SNED1	2.16875	2.67697	9.73806	0.00180491	0.0147763
ENSG00000143674	MAP3K21	-2.16416	6.71026	8.69371	0.00319309	0.0232281
ENSG00000162616	DNAJB4	2.16169	5.96018	20.1335	7.22202e-06	0.000206302
ENSG00000152292	SH2D6	-2.15862	-0.904447	7.91384	0.0049058	0.0320221
ENSG00000160796	NBEAL2	-2.15197	8.13305	10.881	0.000971581	0.00917444
ENSG00000169242	EFNA1	-2.15153	7.12804	7.68924	0.0055551	0.0350909
ENSG00000204580	DDR1	-2.15057	9.73179	12.9356	0.000322398	0.00396841
ENSG00000164674	SYTL3	2.14981	4.35794	7.90553	0.00492838	0.0321127
ENSG00000138111	MFSD13A	-2.14887	5.12805	13.3824	0.000253999	0.00332166
ENSG00000185482	STAC3	-2.14872	2.00276	7.03921	0.00797443	0.0456281
ENSG00000142675	CNKSR1	-2.14626	6.38864	7.20372	0.00727526	0.0424653
ENSG00000166130	IKBIP	2.13999	6.73577	10.7874	0.00102196	0.0095383
ENSG00000181284	TMEM102	-2.13037	5.03712	8.96577	0.00275084	0.0206898
ENSG00000133056	PIK3C2B	-2.12931	7.86974	12.3934	0.000430863	0.00499889
ENSG00000104361	NIPAL2	-2.12595	6.13462	14.5149	0.000139055	0.00210332
ENSG00000111145	ELK3	2.12459	7.16259	18.5567	1.64924e-05	0.000402074
ENSG00000121900	TMEM54	-2.1196	8.24368	10.9287	0.000946834	0.00901565
ENSG00000164124	TMEM144	-2.11685	5.68703	11.8589	0.000573867	0.00619532
ENSG00000137842	TMEM62	-2.11479	6.54754	16.6775	4.4303e-05	0.00087922
ENSG00000134909	ARHGAP32	-2.11196	8.48847	12.7203	0.000361708	0.00436674
ENSG00000144815	NXPE3	2.10576	5.31468	8.73809	0.00311631	0.0228238
ENSG00000066697	MSANTD3	2.10464	6.73836	16.5275	4.79496e-05	0.000938419
ENSG00000198324	PHETA1	-2.09794	7.03867	10.7104	0.00106537	0.00987014
ENSG00000001084	GCLC	-2.0913	8.68687	7.85669	0.00506329	0.0327291
ENSG00000133466	C1QTNF6	2.08463	5.66766	10.1455	0.00144656	0.012406
ENSG00000151240	DIP2C	2.07698	6.07895	8.51038	0.00353127	0.0249505
ENSG00000135835	KIAA1614	2.07683	2.84556	12.3845	0.000432913	0.0050124
ENSG00000196975	ANXA4	-2.07488	9.19673	13.5573	0.000231384	0.00309754
ENSG00000146409	SLC18B1	-2.07454	6.21666	12.212	0.000474825	0.00540909
ENSG00000148841	ITPRIP	2.07111	6.42084	14.352	0.000151615	0.00224779
ENSG00000188343	FAM92A	2.06295	6.08891	9.48464	0.002072	0.0165176
ENSG00000118965	WDR35	2.05965	5.75942	7.14845	0.00750288	0.0435305
ENSG00000165804	ZNF219	-2.05588	7.2242	8.69728	0.00318685	0.0231979
ENSG00000135127	BICDL1	-2.04064	6.18217	6.94623	0.00839962	0.0475082
ENSG00000145632	PLK2	2.03478	9.64465	7.59837	0.00584212	0.036311
ENSG00000164308	ERAP2	2.02864	6.95592	7.09665	0.00772282	0.0443905
ENSG00000176485	PLAAT3	-2.0233	8.69144	8.05995	0.00452545	0.0301483
ENSG00000118515	SGK1	2.01317	7.86004	8.48081	0.00358913	0.0251706
ENSG00000133131	MORC4	-2.00492	8.1513	9.59625	0.00194975	0.0157634
ENSG00000170545	SMAGP	-2.00365	7.61371	9.85101	0.00169739	0.014005
ENSG00000103196	CRISPLD2	2.00119	5.33454	8.95223	0.00277132	0.0208162

## Sheet: 2) DE TFs-Mes VS Epi Cell Lines
GENE_ID	GENE_SYMBOL	logFC	logCPM	LR	PValue	FDR
ENSG00000113722	CDX1	-11.6602	6.39009	10.1626	0.00143318	0.0123286
ENSG00000175329	ISX	-11.1295	3.66398	17.1889	3.38414e-05	0.000722291
ENSG00000170549	IRX1	10.4587	1.98728	18.5931	1.61804e-05	0.000397896
ENSG00000116132	PRRX1	10.1507	3.84375	33.0773	8.85683e-09	8.3154e-07
ENSG00000083307	GRHL2	-10.0008	7.78003	68.0798	1.5701e-16	2.53729e-13
ENSG00000204644	ZFP57	9.90064	3.94041	25.8772	3.63832e-07	1.75135e-05
ENSG00000151702	FLI1	9.74393	4.07544	28.5509	9.12678e-08	5.67265e-06
ENSG00000172818	OVOL1	-9.40229	6.6045	48.4759	3.34376e-12	1.22713e-09
ENSG00000169594	BNC1	9.32256	4.62883	21.6271	3.31138e-06	0.000110824
ENSG00000170608	FOXA3	-8.82957	6.01626	39.623	3.08027e-10	5.05091e-08
ENSG00000135373	EHF	-8.79955	8.71352	38.48	5.53166e-10	8.1265e-08
ENSG00000178860	MSC	8.73639	4.15578	9.39398	0.00217699	0.0171738
ENSG00000112246	SIM1	8.602	1.05776	32.2936	1.3255e-08	1.17141e-06
ENSG00000151322	NPAS3	8.55648	2.12804	33.5792	6.84204e-09	6.67217e-07
ENSG00000151789	ZNF385D	8.51285	-0.264524	21.0857	4.3919e-06	0.000138774
ENSG00000019549	SNAI2	8.46103	6.30416	29.9634	4.40285e-08	3.25523e-06
ENSG00000176293	ZNF135	8.40141	0.235323	21.2897	3.94853e-06	0.000127982
ENSG00000144852	NR1I2	-8.24598	5.33116	11.3954	0.000736272	0.00753511
ENSG00000124664	SPDEF	-8.15136	5.38062	20.4579	6.09564e-06	0.000178637
ENSG00000082175	PGR	7.88263	2.95751	13.9511	0.000187631	0.0026531
ENSG00000198963	RORB	7.76832	1.49634	14.3482	0.000151921	0.00224939
ENSG00000196460	RFX8	7.75205	1.60394	27.4443	1.61681e-07	9.1447e-06
ENSG00000112837	TBX18	7.71967	3.08192	8.52479	0.00350342	0.0247847
ENSG00000163623	NKX6-1	7.49956	2.16271	18.6414	1.57761e-05	0.000390501
ENSG00000079263	SP140	6.90463	3.30872	31.2425	2.27722e-08	1.89719e-06
ENSG00000156127	BATF	-6.69623	4.37088	13.5756	0.000229148	0.00307488
ENSG00000128710	HOXD10	6.52753	2.82626	10.6946	0.00107451	0.00993039
ENSG00000171872	KLF17	6.37687	-0.160783	18.5715	1.63646e-05	0.000400685
ENSG00000110777	POU2AF1	-6.17246	3.25665	8.40241	0.00374724	0.0259735
ENSG00000134323	MYCN	-5.85238	3.99043	8.35195	0.00385274	0.0265583
ENSG00000009950	MLXIPL	-5.85136	6.85027	15.7004	7.42073e-05	0.00127962
ENSG00000157554	ERG	5.76403	-0.537242	14.3439	0.000152269	0.0022516
ENSG00000131914	LIN28A	5.74894	0.911928	9.52081	0.00203155	0.0162409
ENSG00000197928	ZNF677	5.73601	0.262943	6.99652	0.00816682	0.0464237
ENSG00000164379	FOXQ1	-5.69592	8.27924	20.5583	5.78417e-06	0.000170837
ENSG00000188171	ZNF626	5.57556	3.75002	9.03821	0.00264394	0.0200997
ENSG00000128713	HOXD11	5.52566	2.27166	10.1326	0.00145672	0.0124742
ENSG00000101076	HNF4A	-5.51658	8.43196	13.9386	0.000188881	0.00266412
ENSG00000150051	MKX	5.49294	3.74064	11.1009	0.000862864	0.00845816
ENSG00000169554	ZEB2	5.46034	5.11585	7.70628	0.00550291	0.0348538
ENSG00000125850	OVOL2	-5.44604	5.54645	18.9534	1.33953e-05	0.000340511
ENSG00000091656	ZFHX4	5.3903	5.18502	17.6231	2.69295e-05	0.00059848
ENSG00000165556	CDX2	-5.34934	7.25901	11.4823	0.000702631	0.00726523
ENSG00000183734	ASCL2	-5.30985	5.3857	8.38752	0.00377807	0.0261391
ENSG00000124440	HIF3A	-5.2658	0.855564	13.0075	0.000310238	0.00384188
ENSG00000138311	ZNF365	5.24735	2.8577	19.948	7.95787e-06	0.00022282
ENSG00000170577	SIX2	5.23004	2.88706	13.008	0.000310166	0.00384188
ENSG00000166268	MYRFL	-5.21574	1.89087	13.6752	0.000217306	0.00296165
ENSG00000136630	HLX	5.20329	3.00721	32.1714	1.41155e-08	1.23779e-06
ENSG00000164330	EBF1	5.17292	1.7115	8.04799	0.00455541	0.0302589
ENSG00000184486	POU3F2	5.17252	1.17769	14.3114	0.000154927	0.00227898
ENSG00000181449	SOX2	-4.98277	6.20656	6.83694	0.00892918	0.0493439
ENSG00000135100	HNF1A	-4.969	6.48224	29.3397	6.07396e-08	4.13907e-06
ENSG00000139515	PDX1	-4.94958	5.1844	16.774	4.21056e-05	0.000844502
ENSG00000128573	FOXP2	4.87275	1.82328	16.3492	5.26781e-05	0.000999823
ENSG00000140968	IRF8	-4.84924	6.54744	15.7198	7.34517e-05	0.00127047
ENSG00000148516	ZEB1	4.80887	6.01165	15.1379	9.99388e-05	0.00161244
ENSG00000012223	LTF	4.79384	0.769065	15.1655	9.84878e-05	0.00159156
ENSG00000117595	IRF6	-4.77316	8.16215	17.4189	2.99835e-05	0.000655392
ENSG00000158055	GRHL3	-4.7559	5.59319	12.2379	0.000468293	0.00534544
ENSG00000171649	ZIK1	4.73628	1.32519	13.9017	0.000192623	0.00270341
ENSG00000121075	TBX4	-4.7297	2.61101	8.46643	0.00361761	0.0253076
ENSG00000125798	FOXA2	-4.71415	6.75472	9.3626	0.00221458	0.0174141
ENSG00000136574	GATA4	-4.71204	7.1881	9.62782	0.00191652	0.0155298
ENSG00000129654	FOXJ1	-4.70775	5.51411	7.24746	0.00710012	0.0416796
ENSG00000178403	NEUROG2	4.60435	-0.358983	7.95957	0.00478339	0.0313679
ENSG00000109101	FOXN1	4.53222	1.01719	12.0404	0.000520589	0.00575625
ENSG00000083814	ZNF671	4.42454	1.75846	17.7096	2.57324e-05	0.000576992
ENSG00000105610	KLF1	-4.40378	-1.79508	10.1018	0.00148128	0.0126248
ENSG00000116833	NR5A2	-4.3317	4.43761	8.75229	0.00309213	0.0226836
ENSG00000134954	ETS1	4.23852	8.47381	33.7988	6.11165e-09	6.06448e-07
ENSG00000177508	IRX3	4.23306	3.50987	9.98739	0.00157615	0.0132561
ENSG00000176009	ASCL3	4.16753	-2.32738	12.1878	0.000481022	0.00544676
ENSG00000152217	SETBP1	4.11949	3.37953	7.64466	0.00569407	0.0357047
ENSG00000118513	MYB	-4.11706	5.98628	15.8822	6.74094e-05	0.00119945
ENSG00000092607	TBX15	4.0344	2.26477	21.1974	4.14335e-06	0.0001324
ENSG00000118526	TCF21	3.97649	3.08769	8.36042	0.00383481	0.0264735
ENSG00000185697	MYBL1	3.92186	6.96744	26.7045	2.37071e-07	1.24491e-05
ENSG00000143365	RORC	-3.88631	2.95386	9.85638	0.00169243	0.0139743
ENSG00000108001	EBF3	3.84047	0.915071	7.43651	0.00639136	0.038704
ENSG00000113580	NR3C1	3.82421	7.45266	13.9665	0.000186096	0.00263799
ENSG00000177374	HIC1	3.81928	2.86154	17.272	3.23922e-05	0.000697945
ENSG00000169946	ZFPM2	3.6396	3.35892	10.0632	0.00151261	0.0127692
ENSG00000163435	ELF3	-3.52785	9.99181	8.62807	0.00331023	0.0237723
ENSG00000130675	MNX1	-3.50492	5.02121	13.8391	0.000199151	0.0027778
ENSG00000178175	ZNF366	3.47535	-2.45995	13.3699	0.000255689	0.00333553
ENSG00000168779	SHOX2	3.45722	3.86311	9.21411	0.00240157	0.0185691
ENSG00000131127	ZNF141	3.44406	4.72606	9.79047	0.00175418	0.014442
ENSG00000069667	RORA	3.43761	4.70816	16.8303	4.0875e-05	0.000824203
ENSG00000123685	BATF3	3.3466	2.50151	9.22833	0.00238299	0.0184633
ENSG00000152784	PRDM8	3.26248	2.6176	8.04813	0.00455507	0.0302589
ENSG00000124813	RUNX2	3.25603	6.3055	12.6971	0.000366218	0.00441177
ENSG00000127152	BCL11B	-3.21899	4.65777	9.02528	0.00266271	0.0202151
ENSG00000196724	ZNF418	3.20479	0.383273	6.87919	0.00872049	0.0485225
ENSG00000102554	KLF5	-3.18838	9.99887	22.8801	1.72425e-06	6.41602e-05
ENSG00000185420	SMYD3	3.13036	7.13438	24.3631	7.97839e-07	3.3676e-05
ENSG00000149922	TBX6	-3.10523	2.96551	7.82426	0.00515494	0.0330906
ENSG00000153234	NR4A2	-3.03947	4.77383	11.9507	0.000546265	0.00596462
ENSG00000120149	MSX2	-2.98269	7.25825	8.69002	0.00319957	0.0232355
ENSG00000170684	ZNF296	-2.96415	4.02184	13.4857	0.000240383	0.00318409
ENSG00000121406	ZNF549	2.9624	3.80827	7.14748	0.00750693	0.0435305
ENSG00000175592	FOSL1	2.9271	8.5529	24.8322	6.25428e-07	2.75286e-05
ENSG00000129514	FOXA1	-2.92603	7.03739	9.07373	0.00259308	0.0198598
ENSG00000205189	ZBTB10	2.87634	6.88596	6.83708	0.00892849	0.0493439
ENSG00000005073	HOXA11	-2.73901	4.94591	6.80898	0.00907006	0.049924
ENSG00000187098	MITF	2.60928	4.8098	11.8558	0.000574834	0.00619532
ENSG00000152926	ZNF117	-2.60778	6.75683	8.64968	0.00327119	0.0235477
ENSG00000134317	GRHL1	-2.59237	6.59016	7.81617	0.00517807	0.0331895
ENSG00000100625	SIX4	2.55509	6.06206	10.2987	0.00133121	0.0117309
ENSG00000153814	JAZF1	2.53389	4.71196	8.62905	0.00330845	0.0237723
ENSG00000125398	SOX9	-2.49277	9.10226	9.00878	0.00268686	0.020317
ENSG00000123358	NR4A1	-2.47079	7.6454	7.11557	0.00764171	0.0440362
ENSG00000179361	ARID3B	-2.45853	6.34075	7.71679	0.00547096	0.0346903
ENSG00000118263	KLF7	2.40498	6.15249	6.91354	0.00855453	0.0480243
ENSG00000010818	HIVEP2	2.30334	7.43769	21.1807	4.1796e-06	0.000133182
ENSG00000132846	ZBED3	-2.29958	6.41696	11.0358	0.000893671	0.00867743
ENSG00000167081	PBX3	2.26078	6.29049	15.1355	0.000100065	0.00161244
ENSG00000143067	ZNF697	2.23499	5.98663	14.3555	0.000151333	0.00224657
ENSG00000141448	GATA6	-2.23352	8.00438	9.8744	0.00167595	0.0138787
ENSG00000112200	ZNF451	2.21866	8.312	17.9025	2.32513e-05	0.000529214
ENSG00000111145	ELK3	2.12459	7.16259	18.5567	1.64924e-05	0.000402074
ENSG00000066697	MSANTD3	2.10464	6.73836	16.5275	4.79496e-05	0.000938419
ENSG00000165804	ZNF219	-2.05588	7.2242	8.69728	0.00318685	0.0231979

## Sheet: Legends
1) DEG-Mes VS Epi Cell Lines
Differentially expressed genes between Mes-like and Epi-like GC cell lines are shown.
Genes are sorted by |log2FC|. FDR < 0.05 and |log2FC| > 2.
2) DE TFs-Mes VS Epi Cell Lines
Differentially expressed genes that are transcription factors are shown here.
Genes are sorted by |log2FC|. FDR < 0.05 and |log2FC| > 2.
