# Supplementary material for: Machine learning identifies activation of RUNX/AP-1 as drivers of mesenchymal and fibrotic regulatory programs in gastric cancer
Source: HighWire-hosted journal article supplement (doi:10.1101/gr.278565.123), 2024-05-01
Supplement: Supplemental_Table_S1.xlsx [file Supplemental_Table_S1.xlsx]

## Sheet: 1) DEG-Mes VS Epi Cell Lines
GENE_ID	GENE_SYMBOL	logFC	logCPM	LR	PValue	FDR
ENSG00000164692	COL1A2	14.0719	10.7354	29.5205	5.53278e-08	1.70536e-06
ENSG00000087245	MMP2	13.4659	9.0885	48.2179	3.81399e-12	4.68955e-10
ENSG00000060718	COL11A1	12.4699	9.48812	20.9867	4.62478e-06	6.9109e-05
ENSG00000169594	BNC1	12.3847	4.62885	49.0595	2.48314e-12	3.19196e-10
ENSG00000126860	EVI2A	11.8986	6.88825	28.9471	7.43802e-08	2.21418e-06
ENSG00000168685	IL7R	11.8696	6.60766	88.2238	5.8453e-21	4.723e-18
ENSG00000136732	GYPC	11.8255	3.04803	48.1206	4.00788e-12	4.87496e-10
ENSG00000158270	COLEC12	11.7832	5.29921	21.5127	3.515e-06	5.48241e-05
ENSG00000138675	FGF5	11.5327	4.20001	27.4886	1.58027e-07	4.10943e-06
ENSG00000141096	DPEP3	11.5271	5.11223	18.8905	1.3844e-05	0.000169852
ENSG00000168621	GDNF	11.5028	4.32737	30.0464	4.21841e-08	1.3673e-06
ENSG00000162722	TRIM58	11.5009	5.21838	33.4443	7.33339e-09	3.15821e-07
ENSG00000133110	POSTN	11.484	2.90517	29.9144	4.5154e-08	1.43882e-06
ENSG00000164283	ESM1	11.4598	5.30643	30.1836	3.93022e-08	1.2924e-06
ENSG00000175264	CHST1	11.4486	4.27012	44.2409	2.90345e-11	2.69212e-09
ENSG00000151892	GFRA1	11.3987	5.80153	39.8392	2.75755e-10	1.79273e-08
ENSG00000198883	PNMA5	11.3914	7.30067	29.9686	4.39094e-08	1.40709e-06
ENSG00000163661	PTX3	11.3297	6.34433	58.8379	1.71208e-14	3.88427e-12
ENSG00000092345	DAZL	11.2502	3.95699	12.7337	0.000359128	0.00257934
ENSG00000121297	TSHZ3	11.2292	3.13934	33.4278	7.39582e-09	3.169e-07
ENSG00000154736	ADAMTS5	11.1981	3.17055	25.658	4.07595e-07	9.37136e-06
ENSG00000150630	VEGFC	11.1674	4.78561	25.9572	3.49068e-07	8.20926e-06
ENSG00000165633	VSTM4	11.0046	2.24614	19.106	1.23656e-05	0.000154905
ENSG00000154096	THY1	11.0002	5.8963	68.4286	1.31557e-16	5.51175e-14
ENSG00000106483	SFRP4	10.9765	6.97461	16.5462	4.74787e-05	0.00047868
ENSG00000137558	PI15	10.7989	8.27591	37.7851	7.89815e-10	4.51232e-08
ENSG00000130635	COL5A1	10.7763	10.1804	67.6025	2.00016e-16	7.802e-14
ENSG00000168542	COL3A1	10.7572	9.65954	26.3451	2.85547e-07	6.97648e-06
ENSG00000148848	ADAM12	10.7337	5.42832	68.4919	1.27403e-16	5.51175e-14
ENSG00000101938	CHRDL1	10.5648	4.19967	14.328	0.000153561	0.00126795
ENSG00000151702	FLI1	10.3206	4.07547	31.238	2.28253e-08	8.09404e-07
ENSG00000130224	LRCH2	10.3037	3.67964	37.1414	1.09865e-09	5.97497e-08
ENSG00000198963	RORB	10.2298	1.49547	40.2559	2.2278e-10	1.4824e-08
ENSG00000204381	LAYN	10.1729	4.67497	44.5107	2.5297e-11	2.42508e-09
ENSG00000170549	IRX1	10.1675	1.98778	14.9048	0.000113076	0.000992329
ENSG00000134259	NGF	10.1157	2.64215	23.1002	1.53775e-06	2.78432e-05
ENSG00000204644	ZFP57	10.0868	3.94054	25.1089	5.41824e-07	1.17641e-05
ENSG00000116132	PRRX1	10.0408	3.84358	28.7483	8.24209e-08	2.39678e-06
ENSG00000144583	MARCHF4	10.0221	5.43424	41.2332	1.35108e-10	9.61218e-09
ENSG00000156218	ADAMTSL3	10.0198	3.54643	53.8318	2.18406e-13	3.80094e-11
ENSG00000163359	COL6A3	9.99913	10.4988	34.6473	3.95196e-09	1.85496e-07
ENSG00000123572	NRK	9.97354	4.68147	12.0741	0.000511284	0.00345292
ENSG00000176165	FOXG1	9.9545	3.91542	17.1328	3.48557e-05	0.000367463
ENSG00000079931	MOXD1	9.9493	4.54713	43.0222	5.41212e-11	4.37299e-09
ENSG00000197646	PDCD1LG2	9.91262	3.49099	39.4213	3.41551e-10	2.18284e-08
ENSG00000184838	PRR16	9.85043	3.45039	47.2657	6.19868e-12	7.30412e-10
ENSG00000178860	MSC	9.81845	4.15579	12.3775	0.000434538	0.0030212
ENSG00000163873	GRIK3	9.73932	1.95189	11.8152	0.000587478	0.00388543
ENSG00000115232	ITGA4	9.70706	3.40955	27.6965	1.41917e-07	3.7751e-06
ENSG00000143196	DPT	9.68286	1.9158	18.4947	1.70381e-05	0.000199519
ENSG00000110852	CLEC2B	9.66683	4.2503	49.6372	1.8497e-12	2.433e-10
ENSG00000197106	SLC6A17	9.6568	2.5621	24.3575	8.00134e-07	1.6279e-05
ENSG00000180287	PLD5	9.62156	1.45824	15.5119	8.19892e-05	0.000757112
ENSG00000130508	PXDN	9.59695	7.07765	40.8528	1.64138e-10	1.13909e-08
ENSG00000134013	LOXL2	9.59206	8.31905	116.386	3.9118e-27	6.32146e-24
ENSG00000106511	MEOX2	9.57204	3.98466	17.5052	2.86516e-05	0.000312543
ENSG00000103241	FOXF1	9.53244	3.55719	44.9175	2.0551e-11	2.05728e-09
ENSG00000211448	DIO2	9.52397	5.83748	52.2892	4.79006e-13	7.74074e-11
ENSG00000185985	SLITRK2	9.50249	0.830419	24.967	5.83201e-07	1.25184e-05
ENSG00000138829	FBN2	9.47895	7.06791	37.637	8.52139e-10	4.77198e-08
ENSG00000088882	CPXM1	9.47785	3.62945	18.6982	1.5313e-05	0.000182915
ENSG00000227051	C14orf132	9.44302	5.56541	35.839	2.14313e-09	1.09697e-07
ENSG00000175093	SPSB4	9.39547	2.28175	36.4533	1.56365e-09	8.30423e-08
ENSG00000148680	HTR7	9.39032	2.97066	62.6978	2.40989e-15	6.64894e-13
ENSG00000114251	WNT5A	9.37581	6.23208	34.1221	5.17606e-09	2.35147e-07
ENSG00000119865	CNRIP1	9.35806	3.41742	22.892	1.71362e-06	2.99605e-05
ENSG00000183072	NKX2-5	9.35469	3.21076	40.5221	1.94409e-10	1.32479e-08
ENSG00000108691	CCL2	9.31296	3.68509	41.7731	1.02502e-10	7.6283e-09
ENSG00000165323	FAT3	9.31261	4.53258	32.0264	1.52091e-08	5.71581e-07
ENSG00000167178	ISLR2	9.23394	2.54985	29.1634	6.65233e-08	2.0067e-06
ENSG00000162618	ADGRL4	9.19424	1.59734	25.3302	4.83092e-07	1.06733e-05
ENSG00000183287	CCBE1	9.16285	5.25869	41.4082	1.23537e-10	8.90098e-09
ENSG00000144681	STAC	9.12909	4.17042	21.0337	4.51284e-06	6.7615e-05
ENSG00000249751	ECSCR	9.11011	1.01439	25.6004	4.19954e-07	9.59701e-06
ENSG00000144642	RBMS3	9.07885	5.2166	43.3548	4.56619e-11	3.82612e-09
ENSG00000162706	CADM3	9.05461	0.964526	26.5996	2.50294e-07	6.25017e-06
ENSG00000148798	INA	9.05305	2.98228	19.5075	1.00207e-05	0.000130894
ENSG00000112246	SIM1	9.04696	1.05855	34.3884	4.51397e-09	2.08416e-07
ENSG00000104332	SFRP1	9.04692	3.45462	14.4084	0.000147141	0.00122657
ENSG00000106366	SERPINE1	9.00915	10.1812	56.0328	7.12726e-14	1.3217e-11
ENSG00000078053	AMPH	8.98637	1.2935	33.4045	7.48487e-09	3.19505e-07
ENSG00000142173	COL6A2	8.98615	8.80459	33.6337	6.65286e-09	2.90568e-07
ENSG00000163430	FSTL1	8.98445	9.55045	63.9713	1.26246e-15	3.57023e-13
ENSG00000185274	GALNT17	8.9782	1.66837	14.538	0.000137359	0.00115782
ENSG00000171772	SYCE1	8.97676	2.49277	11.6642	0.000637144	0.00414455
ENSG00000156959	LHFPL4	8.97484	0.353963	15.7429	7.25614e-05	0.000684012
ENSG00000154734	ADAMTS1	8.94697	7.66721	23.202	1.45843e-06	2.66954e-05
ENSG00000134874	DZIP1	8.90546	5.12175	42.8183	6.00688e-11	4.81913e-09
ENSG00000145526	CDH18	8.88887	2.80351	23.8392	1.04726e-06	2.039e-05
ENSG00000186310	NAP1L3	8.88205	2.70626	27.7972	1.34723e-07	3.60281e-06
ENSG00000163751	CPA3	8.86927	1.74792	29.1381	6.73969e-08	2.02764e-06
ENSG00000180739	S1PR5	8.84391	2.78882	43.2373	4.84864e-11	4.03293e-09
ENSG00000177108	ZDHHC22	8.83465	1.29226	31.3351	2.17114e-08	7.79682e-07
ENSG00000067840	PDZD4	8.83125	5.10467	64.315	1.06034e-15	3.07554e-13
ENSG00000182013	PNMA8A	8.81753	3.04356	14.6096	0.000132241	0.0011239
ENSG00000174807	CD248	8.81252	2.15058	21.7	3.18795e-06	5.05071e-05
ENSG00000198739	LRRTM3	8.78896	1.47938	19.1496	1.20863e-05	0.00015208
ENSG00000162493	PDPN	8.76869	1.70359	12.7167	0.000362414	0.00260129
ENSG00000169071	ROR2	8.75857	3.83961	61.1515	5.28476e-15	1.32847e-12
ENSG00000169291	SHE	8.75819	2.19384	24.6035	7.04237e-07	1.45371e-05
ENSG00000151468	CCDC3	8.74551	3.4562	28.5559	9.10337e-08	2.60702e-06
ENSG00000111799	COL12A1	8.74385	8.544	58.1312	2.45212e-14	5.3343e-12
ENSG00000108821	COL1A1	8.71671	11.1599	42.6945	6.39928e-11	5.06215e-09
ENSG00000113396	SLC27A6	8.71228	2.37775	20.8455	4.97873e-06	7.391e-05
ENSG00000164107	HAND2	8.69447	0.111399	21.0539	4.46546e-06	6.69938e-05
ENSG00000144152	FBLN7	8.66254	4.65124	33.4418	7.34272e-09	3.15821e-07
ENSG00000122420	PTGFR	8.654	4.24687	17.5635	2.77866e-05	0.000303693
ENSG00000079102	RUNX1T1	8.59099	1.47903	16.3252	5.33502e-05	0.000527957
ENSG00000198046	ZNF667	8.58681	1.3658	23.0607	1.56966e-06	2.8095e-05
ENSG00000166922	SCG5	8.58198	6.96545	48.6632	3.03919e-12	3.77795e-10
ENSG00000013297	CLDN11	8.57282	5.63578	44.4755	2.57557e-11	2.4279e-09
ENSG00000162631	NTNG1	8.55665	1.94216	18.5487	1.65619e-05	0.000194952
ENSG00000147381	MAGEA4	8.53571	8.19518	16.3484	5.27019e-05	0.000522951
ENSG00000066056	TIE1	8.53315	3.86055	35.7448	2.24937e-09	1.13593e-07
ENSG00000120594	PLXDC2	8.52625	4.58939	36.7113	1.36984e-09	7.3789e-08
ENSG00000205363	INSYN1	8.4999	3.09028	24.7758	6.44013e-07	1.35159e-05
ENSG00000048740	CELF2	8.49225	3.97889	29.8004	4.78902e-08	1.51746e-06
ENSG00000197977	ELOVL2	8.48962	3.89177	28.1853	1.10239e-07	3.06394e-06
ENSG00000081237	PTPRC	8.48878	3.65826	34.3616	4.57655e-09	2.10447e-07
ENSG00000169554	ZEB2	8.48803	5.11582	22.4301	2.17931e-06	3.65762e-05
ENSG00000146151	HMGCLL1	8.44544	0.486536	22.1846	2.4765e-06	4.08956e-05
ENSG00000173114	LRRN3	8.4426	3.34947	30.5398	3.27082e-08	1.09466e-06
ENSG00000144339	TMEFF2	8.42575	1.41271	12.4095	0.000427157	0.00298088
ENSG00000186684	CYP27C1	8.3927	2.39355	44.1627	3.02178e-11	2.77905e-09
ENSG00000131459	GFPT2	8.39223	5.51544	87.5177	8.35283e-21	6.29915e-18
ENSG00000131711	MAP1B	8.38497	8.80261	45.4676	1.55189e-11	1.64065e-09
ENSG00000131378	RFTN1	8.36419	4.97815	70.5462	4.49602e-17	2.42186e-14
ENSG00000157851	DPYSL5	8.3544	3.73555	31.9379	1.59183e-08	5.90387e-07
ENSG00000151322	NPAS3	8.34936	2.12828	27.9409	1.25079e-07	3.40118e-06
ENSG00000078098	FAP	8.3472	2.70133	38.4804	5.53052e-10	3.31012e-08
ENSG00000069431	ABCC9	8.33364	6.3453	11.8211	0.000585633	0.00387635
ENSG00000178919	FOXE1	8.32633	1.62782	18.8799	1.39212e-05	0.000170429
ENSG00000113361	CDH6	8.32388	5.53776	13.0783	0.00029874	0.00220872
ENSG00000170153	RNF150	8.31839	1.95059	45.7955	1.31266e-11	1.42777e-09
ENSG00000164744	SUN3	8.31778	2.84517	39.2414	3.74518e-10	2.34063e-08
ENSG00000204711	C9orf135	8.2901	1.752	13.6182	0.000224003	0.00173437
ENSG00000117020	AKT3	8.28992	6.96853	59.8092	1.04516e-14	2.51549e-12
ENSG00000142303	ADAMTS10	8.27689	1.9951	24.9344	5.93135e-07	1.26357e-05
ENSG00000171551	ECEL1	8.26998	4.04849	12.3008	0.000452768	0.0031249
ENSG00000151789	ZNF385D	8.25042	-0.265924	17.0539	3.63333e-05	0.00038091
ENSG00000204767	INSYN2B	8.21107	2.71873	18.8737	1.39664e-05	0.000170797
ENSG00000005102	MEOX1	8.20938	4.30342	15.5647	7.97273e-05	0.000738032
ENSG00000215218	UBE2QL1	8.19205	0.611418	15.2632	9.35185e-05	0.000849022
ENSG00000238243	OR2W3	8.18717	1.38655	23.5704	1.20426e-06	2.27043e-05
ENSG00000122641	INHBA	8.17549	7.68191	33.8468	5.9628e-09	2.67663e-07
ENSG00000171451	DSEL	8.17099	5.16212	29.9205	4.50127e-08	1.43837e-06
ENSG00000165496	RPL10L	8.16367	0.480612	10.1543	0.00143967	0.00800667
ENSG00000256463	SALL3	8.15753	-0.325943	19.3669	1.07858e-05	0.000138489
ENSG00000154133	ROBO4	8.15744	2.61723	37.2656	1.03089e-09	5.63356e-08
ENSG00000166147	FBN1	8.15186	7.70501	56.6525	5.20036e-14	9.97059e-12
ENSG00000163520	FBLN2	8.14885	6.56746	32.1325	1.44011e-08	5.44835e-07
ENSG00000100285	NEFH	8.14848	2.86784	31.3361	2.17006e-08	7.79682e-07
ENSG00000145147	SLIT2	8.14711	5.33616	29.479	5.65273e-08	1.7376e-06
ENSG00000038295	TLL1	8.13659	1.44967	8.04387	0.0045658	0.0205934
ENSG00000185559	DLK1	8.11545	0.106855	11.9739	0.000539522	0.00361986
ENSG00000196460	RFX8	8.11279	1.60403	29.5339	5.49485e-08	1.70011e-06
ENSG00000164236	ANKRD33B	8.10668	2.26587	74.2997	6.7113e-18	3.79591e-15
ENSG00000019549	SNAI2	8.10546	6.30414	24.8009	6.35663e-07	1.33655e-05
ENSG00000196867	ZFP28	8.09531	3.34727	22.9074	1.70001e-06	2.98147e-05
ENSG00000176293	ZNF135	8.09205	0.236458	16.3637	5.22756e-05	0.000519632
ENSG00000179855	GIPC3	8.06647	0.718482	19.218	1.16609e-05	0.000148211
ENSG00000112175	BMP5	8.0603	3.81037	20.024	7.6478e-06	0.000105118
ENSG00000038427	VCAN	8.04461	6.44284	26.8654	2.18129e-07	5.53247e-06
ENSG00000160963	COL26A1	8.03394	4.44789	33.8115	6.0719e-09	2.69354e-07
ENSG00000183114	FAM43B	8.02669	0.54206	30.9221	2.68601e-08	9.29178e-07
ENSG00000129009	ISLR	8.02558	1.06621	31.3027	2.20773e-08	7.90312e-07
ENSG00000170989	S1PR1	8.01316	2.5986	51.4936	7.18319e-13	1.1131e-10
ENSG00000011465	DCN	7.95509	3.84813	37.8744	7.54502e-10	4.35366e-08
ENSG00000104415	CCN4	7.94992	2.27989	23.6788	1.13829e-06	2.18243e-05
ENSG00000072832	CRMP1	7.93942	5.1195	41.6553	1.08871e-10	8.04931e-09
ENSG00000180777	ANKRD30B	7.92799	1.44114	29.1064	6.85098e-08	2.05566e-06
ENSG00000152611	CAPSL	7.91706	-0.394777	38.3767	5.83233e-10	3.45421e-08
ENSG00000186081	KRT5	7.91549	6.61704	18.4796	1.71731e-05	0.000200684
ENSG00000178031	ADAMTSL1	7.90865	4.77759	32.4004	1.2546e-08	4.91073e-07
ENSG00000173068	BNC2	7.89012	3.79906	51.7742	6.22636e-13	9.92009e-11
ENSG00000107518	ATRNL1	7.8886	3.01132	25.5329	4.34911e-07	9.83942e-06
ENSG00000140600	SH3GL3	7.87328	3.18517	19.3696	1.07707e-05	0.000138453
ENSG00000146966	DENND2A	7.87076	3.5496	47.5416	5.3848e-12	6.41188e-10
ENSG00000189367	KIAA0408	7.84298	3.37032	23.9795	9.73668e-07	1.91884e-05
ENSG00000170370	EMX2	7.83406	-0.0779133	18.8153	1.44004e-05	0.00017385
ENSG00000182636	NDN	7.83118	1.69637	10.9421	0.000940028	0.00571392
ENSG00000110675	ELMOD1	7.8297	1.93037	30.9688	2.62213e-08	9.15478e-07
ENSG00000184221	OLIG1	7.82412	0.111826	11.203	0.000816669	0.0050927
ENSG00000113578	FGF1	7.80852	2.53698	57.7587	2.96326e-14	6.09461e-12
ENSG00000242715	CCDC169	7.7981	1.01196	20.7839	5.14139e-06	7.59261e-05
ENSG00000259207	ITGB3	7.79516	3.31147	48.6919	2.99506e-12	3.76446e-10
ENSG00000184304	PRKD1	7.7756	3.66824	23.043	1.58417e-06	2.82855e-05
ENSG00000164932	CTHRC1	7.77452	5.29491	39.121	3.98328e-10	2.47576e-08
ENSG00000172260	NEGR1	7.76205	1.07929	42.4181	7.37055e-11	5.66774e-09
ENSG00000177875	CCDC184	7.7602	1.14043	21.7504	3.10527e-06	4.93353e-05
ENSG00000107105	ELAVL2	7.73637	3.33304	33.3576	7.66766e-09	3.24856e-07
ENSG00000185760	KCNQ5	7.73623	3.43048	23.5482	1.21825e-06	2.29299e-05
ENSG00000182195	LDOC1	7.71754	2.62706	10.376	0.00127661	0.00731561
ENSG00000100985	MMP9	7.71622	1.001	40.2033	2.28866e-10	1.51399e-08
ENSG00000137573	SULF1	7.70996	4.69018	27.7716	1.36519e-07	3.64221e-06
ENSG00000140459	CYP11A1	7.70421	4.15693	26.544	2.57599e-07	6.37628e-06
ENSG00000144476	ACKR3	7.70131	4.6565	30.895	2.72367e-08	9.36966e-07
ENSG00000175352	NRIP3	7.69492	5.66421	35.236	2.92074e-09	1.43649e-07
ENSG00000167654	ATCAY	7.66967	0.388853	22.7873	1.80953e-06	3.13948e-05
ENSG00000004468	CD38	7.65731	5.13314	30.1652	3.96759e-08	1.30091e-06
ENSG00000141750	STAC2	7.64296	1.10825	26.3832	2.79968e-07	6.85497e-06
ENSG00000102452	NALCN	7.63837	1.9831	34.957	3.37061e-09	1.59544e-07
ENSG00000183098	GPC6	7.63457	4.08401	26.5118	2.61937e-07	6.4695e-06
ENSG00000071967	CYBRD1	7.63113	7.10103	27.875	1.29412e-07	3.4938e-06
ENSG00000131668	BARX1	7.62837	3.99557	23.5744	1.20178e-06	2.27043e-05
ENSG00000127920	GNG11	7.62574	5.85986	25.2887	4.936e-07	1.0863e-05
ENSG00000234068	PAGE2	7.62214	4.12917	17.6675	2.63083e-05	0.000290624
ENSG00000174837	ADGRE1	7.60239	2.13872	25.3623	4.75121e-07	1.05591e-05
ENSG00000172318	B3GALT1	7.60219	1.77001	18.3652	1.82356e-05	0.000210706
ENSG00000138083	SIX3	7.58957	2.37076	18.2275	1.96029e-05	0.000224668
ENSG00000154118	JPH3	7.58747	4.74709	51.091	8.81838e-13	1.34802e-10
ENSG00000162745	OLFML2B	7.58444	3.74465	45.4889	1.53504e-11	1.63815e-09
ENSG00000087494	PTHLH	7.57548	5.53552	32.3694	1.2748e-08	4.93853e-07
ENSG00000130176	CNN1	7.57313	2.55927	44.9579	2.0132e-11	2.05165e-09
ENSG00000128805	ARHGAP22	7.57006	3.01151	42.6391	6.58291e-11	5.17124e-09
ENSG00000082175	PGR	7.56835	2.95753	11.9442	0.000548166	0.00366914
ENSG00000105143	SLC1A6	7.5528	3.72701	10.5346	0.00117162	0.0068387
ENSG00000123496	IL13RA2	7.54329	2.95968	31.2752	2.23917e-08	7.96525e-07
ENSG00000167332	OR51E2	7.53845	-0.86769	18.1234	2.07047e-05	0.0002361
ENSG00000122824	NUDT10	7.53764	-0.271263	15.8654	6.80103e-05	0.000647041
ENSG00000161896	IP6K3	7.53208	-0.715875	17.9616	2.25405e-05	0.000253963
ENSG00000167601	AXL	7.52562	9.06733	67.8335	1.77899e-16	7.18712e-14
ENSG00000170214	ADRA1B	7.52404	1.57302	33.1806	8.39859e-09	3.48517e-07
ENSG00000126733	DACH2	7.52281	0.802117	8.43468	0.00368132	0.0173224
ENSG00000102683	SGCG	7.52259	-0.226659	20.5022	5.95641e-06	8.57238e-05
ENSG00000165899	OTOGL	7.50948	4.31669	28.2225	1.08138e-07	3.02039e-06
ENSG00000160886	LY6K	7.50926	6.13966	27.4891	1.57986e-07	4.10943e-06
ENSG00000169218	RSPO1	7.50334	-0.745899	19.9607	7.90505e-06	0.000107221
ENSG00000163623	NKX6-1	7.4993	2.16277	17.7445	2.52651e-05	0.00027992
ENSG00000114450	GNB4	7.4943	5.65037	55.6174	8.80395e-14	1.5808e-11
ENSG00000011201	ANOS1	7.48973	3.18618	16.6672	4.45457e-05	0.000454374
ENSG00000154175	ABI3BP	7.45822	4.58168	50.8197	1.01253e-12	1.48728e-10
ENSG00000151388	ADAMTS12	7.452	6.48866	20.7961	5.10863e-06	7.5634e-05
ENSG00000105825	TFPI2	7.44177	6.83401	14.3438	0.000152276	0.00125836
ENSG00000115935	WIPF1	7.4413	4.47591	27.1656	1.86756e-07	4.80132e-06
ENSG00000162039	MEIOB	7.4408	2.3966	33.8214	6.04111e-09	2.69043e-07
ENSG00000144857	BOC	7.4342	3.16947	46.1956	1.07019e-11	1.19861e-09
ENSG00000258484	SPESP1	7.43244	1.32362	10.8182	0.00100506	0.00603463
ENSG00000130558	OLFM1	7.43212	5.02144	17.8247	2.42213e-05	0.000269676
ENSG00000173546	CSPG4	7.42039	7.40176	50.7947	1.02553e-12	1.48728e-10
ENSG00000151917	BEND6	7.41069	3.71272	55.9244	7.53121e-14	1.37408e-11
ENSG00000144057	ST6GAL2	7.40661	0.975227	11.8732	0.00056946	0.00379149
ENSG00000056487	PHF21B	7.40086	1.83256	14.9344	0.000111316	0.000978407
ENSG00000100234	TIMP3	7.39837	8.73143	18.7029	1.5275e-05	0.000182654
ENSG00000108684	ASIC2	7.38181	0.882677	19.495	1.00864e-05	0.0001316
ENSG00000176406	RIMS2	7.37513	2.47969	28.4668	9.532e-08	2.71602e-06
ENSG00000163568	AIM2	7.37392	2.20391	22.5171	2.08278e-06	3.52173e-05
ENSG00000137809	ITGA11	7.373	4.69123	19.5512	9.79374e-06	0.000128523
ENSG00000104321	TRPA1	7.36864	0.934496	14.6477	0.000129592	0.00110804
ENSG00000215262	KCNU1	7.36592	-0.027336	8.3431	0.00387155	0.0180004
ENSG00000112837	TBX18	7.36242	3.08207	7.36773	0.00664047	0.0279765
ENSG00000233608	TWIST2	7.34969	0.516888	16.5878	4.64485e-05	0.000470038
ENSG00000104967	NOVA2	7.3375	1.38769	31.889	1.63238e-08	6.0148e-07
ENSG00000130592	LSP1	7.33617	2.97032	26.497	2.63945e-07	6.49075e-06
ENSG00000165072	MAMDC2	7.3342	4.95426	35.7698	2.22061e-09	1.12644e-07
ENSG00000117594	HSD11B1	7.31044	3.3367	18.1131	2.08165e-05	0.000237136
ENSG00000121005	CRISPLD1	7.28812	5.43362	9.56116	0.00198737	0.0104079
ENSG00000066629	EML1	7.28351	4.76144	45.5484	1.48911e-11	1.60427e-09
ENSG00000196263	ZNF471	7.27911	2.50857	14.6899	0.000126725	0.00108929
ENSG00000164604	GPR85	7.2752	0.87093	17.5437	2.80787e-05	0.000306589
ENSG00000167083	GNGT2	7.26468	-0.469458	28.9609	7.38541e-08	2.20566e-06
ENSG00000164161	HHIP	7.25833	1.79025	25.7534	3.87952e-07	8.99285e-06
ENSG00000131386	GALNT15	7.25173	2.0791	26.9777	2.05813e-07	5.25542e-06
ENSG00000171872	KLF17	7.23391	-0.160838	27.6697	1.43901e-07	3.8033e-06
ENSG00000144218	AFF3	7.21601	3.39291	25.4668	4.50071e-07	1.00816e-05
ENSG00000006638	TBXA2R	7.19744	1.8378	62.408	2.79191e-15	7.51953e-13
ENSG00000214575	CPEB1	7.19661	2.0911	23.606	1.18217e-06	2.24375e-05
ENSG00000037280	FLT4	7.18975	2.91879	24.3696	7.95141e-07	1.62066e-05
ENSG00000168280	KIF5C	7.18846	3.09077	35.0764	3.17016e-09	1.51583e-07
ENSG00000105894	PTN	7.16427	3.30552	21.2323	4.06848e-06	6.20251e-05
ENSG00000105974	CAV1	7.16411	9.89318	40.0227	2.51031e-10	1.64142e-08
ENSG00000153976	HS3ST3A1	7.15836	3.74592	22.9028	1.70404e-06	2.98391e-05
ENSG00000173421	CCDC36	7.13237	1.16168	29.9859	4.35204e-08	1.40257e-06
ENSG00000105137	SYDE1	7.12735	5.69372	37.3167	1.00422e-09	5.51443e-08
ENSG00000075043	KCNQ2	7.09783	4.21145	35.0849	3.15638e-09	1.51583e-07
ENSG00000128710	HOXD10	7.083	2.82634	12.9791	0.000314992	0.00231188
ENSG00000109472	CPE	7.07429	5.80552	23.1177	1.52384e-06	2.77134e-05
ENSG00000127903	ZNF835	7.05803	-1.14184	13.5797	0.00022865	0.00176553
ENSG00000176788	BASP1	7.05677	7.12419	13.7713	0.000206462	0.00162075
ENSG00000158186	MRAS	7.05378	4.90644	66.3187	3.83597e-16	1.27629e-13
ENSG00000106236	NPTX2	7.0528	0.996596	10.3296	0.00130912	0.00745659
ENSG00000171033	PKIA	7.03535	4.46159	13.6438	0.000220975	0.00171327
ENSG00000184613	NELL2	7.03142	5.62349	19.0954	1.24344e-05	0.000155595
ENSG00000206052	DOK6	7.02722	2.38348	13.142	0.000288752	0.00215034
ENSG00000113263	ITK	7.02719	-0.0223425	17.2841	3.21875e-05	0.00034447
ENSG00000141314	RHBDL3	7.02052	2.18009	30.5002	3.33828e-08	1.11067e-06
ENSG00000182870	GALNT9	7.01416	3.47008	19.9137	8.10196e-06	0.000108977
ENSG00000079156	OSBPL6	7.00867	4.38586	35.6683	2.33945e-09	1.17097e-07
ENSG00000138080	EMILIN1	7.00477	6.05592	42.4062	7.41537e-11	5.66774e-09
ENSG00000124302	CHST8	7.00197	0.417909	12.4796	0.000411413	0.00288434
ENSG00000143194	MAEL	6.99823	2.73499	14.951	0.000110338	0.000971314
ENSG00000154654	NCAM2	6.99463	3.76835	18.8436	1.41885e-05	0.000172581
ENSG00000108798	ABI3	6.98878	0.74796	14.6761	0.000127652	0.0010956
ENSG00000112333	NR2E1	6.98668	1.12142	7.38856	0.00656399	0.0277266
ENSG00000197928	ZNF677	6.98239	0.264221	12.7698	0.000352252	0.00253716
ENSG00000174599	TRAM1L1	6.98089	1.31946	21.9081	2.86024e-06	4.60898e-05
ENSG00000073712	FERMT2	6.98067	7.35913	36.307	1.68562e-09	8.91013e-08
ENSG00000110203	FOLR3	6.97956	-0.107433	22.1233	2.55693e-06	4.20406e-05
ENSG00000134516	DOCK2	6.97572	1.6925	28.208	1.08953e-07	3.03566e-06
ENSG00000143341	HMCN1	6.96429	4.28829	37.8648	7.58196e-10	4.35366e-08
ENSG00000113083	LOX	6.9595	7.4467	40.0732	2.44616e-10	1.60878e-08
ENSG00000152977	ZIC1	6.95589	3.30083	6.35499	0.0117051	0.0440921
ENSG00000102755	FLT1	6.95198	3.61389	23.7321	1.10722e-06	2.13372e-05
ENSG00000160539	PLPP7	6.94934	1.85186	21.1723	4.19785e-06	6.36543e-05
ENSG00000108947	EFNB3	6.93946	3.81734	35.3692	2.72761e-09	1.34737e-07
ENSG00000253250	C8orf88	6.9351	1.76018	26.5493	2.56904e-07	6.37302e-06
ENSG00000149451	ADAM33	6.93108	0.980218	10.1689	0.00142832	0.00796702
ENSG00000187140	FOXD3	6.91771	0.95345	20.0985	7.35541e-06	0.000101966
ENSG00000169933	FRMPD4	6.91211	0.783246	24.6465	6.88698e-07	1.42423e-05
ENSG00000150051	MKX	6.89843	3.74075	19.7003	9.05858e-06	0.000120124
ENSG00000167889	MGAT5B	6.89069	4.72566	32.2761	1.33746e-08	5.09407e-07
ENSG00000184867	ARMCX2	6.88865	4.56888	15.8283	6.9359e-05	0.000658212
ENSG00000203867	RBM20	6.88611	2.57015	40.3684	2.10319e-10	1.40777e-08
ENSG00000148516	ZEB1	6.8762	6.01164	43.3875	4.49043e-11	3.79072e-09
ENSG00000139926	FRMD6	6.87414	8.29597	44.4498	2.60968e-11	2.43973e-09
ENSG00000136999	CCN3	6.85668	5.19669	31.5381	1.95563e-08	7.15927e-07
ENSG00000079263	SP140	6.8278	3.30841	28.9051	7.60135e-08	2.25686e-06
ENSG00000135905	DOCK10	6.82761	4.36978	18.8209	1.43589e-05	0.000173534
ENSG00000132718	SYT11	6.82476	3.97612	35.8609	2.11923e-09	1.09465e-07
ENSG00000163395	IGFN1	6.81974	3.52975	53.2015	3.01021e-13	5.08232e-11
ENSG00000176988	FMR1NB	6.81312	1.23277	9.07537	0.00259075	0.0129618
ENSG00000151640	DPYSL4	6.80206	2.47476	26.3182	2.8955e-07	7.05167e-06
ENSG00000073861	TBX21	6.80144	-1.31101	21.7895	3.04268e-06	4.86141e-05
ENSG00000101204	CHRNA4	6.79481	1.79096	10.7168	0.00106164	0.00631405
ENSG00000152953	STK32B	6.78122	4.2783	10.1755	0.00142319	0.00795021
ENSG00000120498	TEX11	6.77541	3.99035	18.5764	1.63228e-05	0.000192738
ENSG00000107186	MPDZ	6.77426	5.02344	11.2525	0.000795153	0.00498325
ENSG00000152377	SPOCK1	6.76875	6.8004	23.0626	1.56813e-06	2.8095e-05
ENSG00000256235	SMIM3	6.75868	-1.28163	13.216	0.000277567	0.00208212
ENSG00000170837	GPR27	6.75848	2.73879	16.4401	5.02104e-05	0.000500865
ENSG00000137801	THBS1	6.7555	10.4168	25.4072	4.64188e-07	1.03773e-05
ENSG00000050767	COL23A1	6.75266	0.798692	20.0876	7.39766e-06	0.000102426
ENSG00000075884	ARHGAP15	6.74634	-0.338306	19.2372	1.1544e-05	0.00014689
ENSG00000022267	FHL1	6.74187	6.51913	43.2074	4.9233e-11	4.06096e-09
ENSG00000170390	DCLK2	6.74095	3.08505	21.3947	3.73805e-06	5.76087e-05
ENSG00000198300	PEG3	6.73315	2.43366	9.26469	0.00233614	0.0118557
ENSG00000185862	EVI2B	6.72076	3.18782	20.1712	7.08118e-06	9.9014e-05
ENSG00000203883	SOX18	6.71919	2.23719	16.3686	5.21415e-05	0.000519212
ENSG00000152969	JAKMIP1	6.71415	-0.244191	8.36249	0.00383045	0.0178533
ENSG00000187714	SLC18A3	6.71174	-0.714057	7.4093	0.00648874	0.0274806
ENSG00000136404	TM6SF1	6.70976	1.79913	23.2947	1.38982e-06	2.56471e-05
ENSG00000183780	SLC35F3	6.70814	1.59771	28.8708	7.73695e-08	2.29111e-06
ENSG00000149506	ZP1	6.69882	-0.216859	12.2737	0.000459385	0.00316414
ENSG00000155816	FMN2	6.69855	3.6687	15.7963	7.05396e-05	0.000668295
ENSG00000112539	C6orf118	6.69763	-0.902281	13.1185	0.000292401	0.00217037
ENSG00000168824	NSG1	6.6786	4.38063	31.3625	2.14076e-08	7.73682e-07
ENSG00000122870	BICC1	6.67117	4.64161	18.8328	1.42693e-05	0.000173006
ENSG00000107295	SH3GL2	6.66303	2.68886	15.218	9.57845e-05	0.000867796
ENSG00000146374	RSPO3	6.65811	0.677714	14.6612	0.000128667	0.0011018
ENSG00000173705	SUSD5	6.65681	4.43612	31.9625	1.57181e-08	5.86809e-07
ENSG00000055813	CCDC85A	6.65214	3.2012	13.7735	0.000206222	0.00162047
ENSG00000138944	SHISAL1	6.65016	3.3444	17.6315	2.68115e-05	0.000295894
ENSG00000188641	DPYD	6.64834	6.1752	41.5574	1.1446e-10	8.40759e-09
ENSG00000120156	TEK	6.64521	1.44788	30.556	3.24359e-08	1.08877e-06
ENSG00000072840	EVC	6.64042	6.29172	19.9711	7.86234e-06	0.000107026
ENSG00000166396	SERPINB7	6.63874	5.51834	19.9298	8.03389e-06	0.000108577
ENSG00000155897	ADCY8	6.63869	-1.38331	17.6008	2.72473e-05	0.000298375
ENSG00000091986	CCDC80	6.63662	9.01072	27.5472	1.53309e-07	4.02375e-06
ENSG00000157680	DGKI	6.63629	3.64379	14.0774	0.000175442	0.00140852
ENSG00000162670	BRINP3	6.63442	0.653837	15.4152	8.62933e-05	0.000789127
ENSG00000162551	ALPL	6.62528	2.36491	35.9589	2.01519e-09	1.0505e-07
ENSG00000183715	OPCML	6.6252	-1.44945	11.7222	0.000617591	0.00404059
ENSG00000206262	FOXL2NB	6.61648	2.89167	28.4229	9.75038e-08	2.75741e-06
ENSG00000152495	CAMK4	6.61572	3.45789	43.4204	4.41562e-11	3.7556e-09
ENSG00000138622	HCN4	6.61243	1.588	31.288	2.2245e-08	7.93804e-07
ENSG00000134769	DTNA	6.60892	3.91477	18.925	1.3596e-05	0.000167354
ENSG00000168269	FOXI1	6.60674	0.938694	11.4108	0.000730164	0.00465069
ENSG00000182103	FAM181B	6.60616	-1.09359	19.6982	9.0688e-06	0.000120124
ENSG00000089041	P2RX7	6.60353	1.97498	20.5815	5.71451e-06	8.26632e-05
ENSG00000156113	KCNMA1	6.60333	5.50383	22.4532	2.15323e-06	3.62461e-05
ENSG00000115461	IGFBP5	6.58948	7.06198	15.0639	0.000103931	0.000931587
ENSG00000128713	HOXD11	6.5765	2.27178	16.1558	5.83398e-05	0.000572865
ENSG00000196632	WNK3	6.57176	2.39285	31.4933	2.00133e-08	7.30291e-07
ENSG00000127533	F2RL3	6.56753	-0.455589	26.8072	2.24798e-07	5.66351e-06
ENSG00000172967	XKR3	6.56733	0.268416	20.4981	5.96898e-06	8.57333e-05
ENSG00000115602	IL1RL1	6.56577	4.00098	11.2505	0.000796027	0.00498597
ENSG00000171243	SOSTDC1	6.56507	5.54343	18.3487	1.83945e-05	0.000212325
ENSG00000196159	FAT4	6.56228	4.91405	27.8753	1.29388e-07	3.4938e-06
ENSG00000198914	POU3F3	6.55651	-1.46854	17.613	2.70727e-05	0.000297906
ENSG00000113430	IRX4	6.55538	0.140468	23.6463	1.15766e-06	2.21207e-05
ENSG00000087116	ADAMTS2	6.54247	5.37425	28.1731	1.10934e-07	3.07571e-06
ENSG00000152779	SLC16A12	6.53852	1.7127	23.2071	1.45456e-06	2.66678e-05
ENSG00000158445	KCNB1	6.53017	1.34532	38.0901	6.75517e-10	3.9593e-08
ENSG00000182963	GJC1	6.52952	5.96677	50.7041	1.07393e-12	1.51854e-10
ENSG00000183853	KIRREL1	6.52544	7.60641	26.6498	2.43878e-07	6.10343e-06
ENSG00000204941	PSG5	6.52325	4.46517	11.3471	0.000755659	0.00478056
ENSG00000204131	NHSL2	6.52137	0.536692	46.2961	1.01668e-11	1.15007e-09
ENSG00000138411	HECW2	6.51623	4.56539	34.3055	4.7106e-09	2.15734e-07
ENSG00000165553	NGB	6.51511	-0.762024	14.2624	0.000159008	0.0013053
ENSG00000145934	TENM2	6.51505	6.62372	16.472	4.93726e-05	0.000493813
ENSG00000169439	SDC2	6.51411	5.80267	26.886	2.15811e-07	5.49833e-06
ENSG00000131914	LIN28A	6.50679	0.912834	13.4726	0.000242078	0.00185026
ENSG00000146453	PNLDC1	6.50318	2.8771	16.6896	4.40228e-05	0.000449852
ENSG00000149403	GRIK4	6.49295	1.35824	32.4186	1.24293e-08	4.88194e-07
ENSG00000163239	TDRD10	6.48803	-0.783454	6.28225	0.0121953	0.0454837
ENSG00000135636	DYSF	6.47293	5.15337	42.5978	6.72364e-11	5.24536e-09
ENSG00000183770	FOXL2	6.47194	3.44692	18.0697	2.12959e-05	0.000241624
ENSG00000078018	MAP2	6.47084	6.84844	26.0815	3.27298e-07	7.77814e-06
ENSG00000099260	PALMD	6.46105	4.56111	22.4238	2.18652e-06	3.66428e-05
ENSG00000204006	C1orf185	6.45048	-1.52705	11.3941	0.000736782	0.00467704
ENSG00000187240	DYNC2H1	6.44791	7.39164	43.7182	3.79221e-11	3.32539e-09
ENSG00000105695	MAG	6.44379	0.196872	12.878	0.00033247	0.00242482
ENSG00000159167	STC1	6.43959	4.97134	32.2363	1.36514e-08	5.18202e-07
ENSG00000099998	GGT5	6.43886	1.22972	25.9896	3.4326e-07	8.10639e-06
ENSG00000162692	VCAM1	6.43549	-0.321843	34.529	4.19954e-09	1.94693e-07
ENSG00000240771	ARHGEF25	6.41697	3.62682	30.5881	3.19053e-08	1.07735e-06
ENSG00000154589	LY96	6.41477	2.9725	22.0382	2.67276e-06	4.35026e-05
ENSG00000138356	AOX1	6.41236	4.95115	35.2229	2.94052e-09	1.43997e-07
ENSG00000113721	PDGFRB	6.38883	5.02785	37.6413	8.50244e-10	4.77198e-08
ENSG00000166106	ADAMTS15	6.37285	5.11443	23.4097	1.30919e-06	2.43856e-05
ENSG00000118473	SGIP1	6.36838	-0.0583656	16.4653	4.95495e-05	0.000495144
ENSG00000196358	NTNG2	6.35957	2.4254	38.61	5.17532e-10	3.13065e-08
ENSG00000187955	COL14A1	6.32968	2.60885	27.5914	1.4984e-07	3.94183e-06
ENSG00000188848	BEND4	6.32744	0.792942	12.9409	0.000321486	0.00235382
ENSG00000187550	SBK2	6.32092	-1.23253	15.0326	0.00010567	0.000942696
ENSG00000117600	PLPPR4	6.31901	0.364345	9.69068	0.00185205	0.00981285
ENSG00000175879	HOXD8	6.31522	2.13786	15.1687	9.83207e-05	0.000886925
ENSG00000112964	GHR	6.31129	2.27057	10.5136	0.00118496	0.0068981
ENSG00000026559	KCNG1	6.30136	5.82506	18.8836	1.3894e-05	0.000170281
ENSG00000188171	ZNF626	6.30001	3.74986	12.1087	0.000501879	0.00339752
ENSG00000144355	DLX1	6.29945	3.53912	39.7763	2.84781e-10	1.84083e-08
ENSG00000138685	FGF2	6.29803	5.56406	23.9738	9.76553e-07	1.92118e-05
ENSG00000154864	PIEZO2	6.28969	4.90006	17.3458	3.11581e-05	0.000334721
ENSG00000163273	NPPC	6.28278	0.342193	19.9267	8.04699e-06	0.000108625
ENSG00000150628	SPATA4	6.27821	0.201779	22.9675	1.64762e-06	2.91217e-05
ENSG00000109738	GLRB	6.27607	3.74257	7.66684	0.00562449	0.0244239
ENSG00000132563	REEP2	6.27341	4.47992	43.9323	3.39936e-11	3.02784e-09
ENSG00000050555	LAMC3	6.27319	2.71688	24.458	7.59462e-07	1.55073e-05
ENSG00000196549	MME	6.27045	7.74784	20.7096	5.34468e-06	7.83148e-05
ENSG00000075340	ADD2	6.26073	3.07329	15.1876	9.73382e-05	0.000879464
ENSG00000203837	PNLIPRP3	6.2601	0.543173	6.74698	0.00939065	0.0370646
ENSG00000106538	RARRES2	6.26008	6.40799	38.5816	5.25122e-10	3.15967e-08
ENSG00000196184	OR10J1	6.24912	-1.71363	7.19966	0.00729174	0.030225
ENSG00000137959	IFI44L	6.2431	5.15867	19.5276	9.91589e-06	0.000129975
ENSG00000187398	LUZP2	6.23839	1.80047	12.6042	0.000384878	0.00273476
ENSG00000156475	PPP2R2B	6.23376	3.53986	12.7132	0.000363078	0.0026028
ENSG00000109991	P2RX3	6.22632	-0.280951	11.1066	0.000860226	0.00532907
ENSG00000154553	PDLIM3	6.21866	2.92868	21.4569	3.61881e-06	5.60766e-05
ENSG00000170962	PDGFD	6.21796	3.98511	19.7133	8.99712e-06	0.000120013
ENSG00000181790	ADGRB1	6.21606	3.48883	26.1903	3.09372e-07	7.41443e-06
ENSG00000107562	CXCL12	6.2141	0.758884	14.9729	0.000109067	0.000962372
ENSG00000158473	CD1D	6.213	0.181006	23.7779	1.08114e-06	2.09176e-05
ENSG00000185905	C16orf54	6.21124	3.03643	11.2747	0.000785685	0.00494706
ENSG00000132321	IQCA1	6.20905	-0.265908	22.3569	2.26397e-06	3.78286e-05
ENSG00000072163	LIMS2	6.20869	4.35337	31.0309	2.53947e-08	8.89366e-07
ENSG00000064989	CALCRL	6.20824	1.61732	29.3002	6.19908e-08	1.88505e-06
ENSG00000188906	LRRK2	6.2068	1.63145	16.0464	6.1809e-05	0.000598104
ENSG00000143469	SYT14	6.2053	3.265	35.5342	2.50617e-09	1.24341e-07
ENSG00000123610	TNFAIP6	6.19181	-0.69942	13.7784	0.00020569	0.00161806
ENSG00000124785	NRN1	6.18147	2.15659	10.3048	0.00132686	0.00753105
ENSG00000180447	GAS1	6.17149	3.61125	18.5624	1.64429e-05	0.000193753
ENSG00000152580	IGSF10	6.16897	3.83557	30.227	3.84322e-08	1.26994e-06
ENSG00000112183	RBM24	6.154	3.82241	17.0339	3.67179e-05	0.00038423
ENSG00000138131	LOXL4	6.14157	6.9636	20.6563	5.49558e-06	8.01108e-05
ENSG00000036530	CYP46A1	6.13533	0.523081	32.8406	1.00033e-08	4.01266e-07
ENSG00000105605	CACNG7	6.12826	-0.526512	20.165	7.1041e-06	9.92118e-05
ENSG00000173262	SLC2A14	6.1249	2.24625	20.0363	7.59843e-06	0.000104861
ENSG00000117152	RGS4	6.12102	2.49347	29.1899	6.56198e-08	1.98473e-06
ENSG00000203952	CCDC160	6.11902	1.89385	16.007	6.31089e-05	0.000609097
ENSG00000128709	HOXD9	6.11798	1.37617	9.91148	0.00164251	0.00890163
ENSG00000116983	HPCAL4	6.10809	1.0361	30.7722	2.90165e-08	9.82738e-07
ENSG00000134539	KLRD1	6.09147	-1.68246	26.0143	3.38891e-07	8.01994e-06
ENSG00000136546	SCN7A	6.0853	-0.776145	9.27907	0.00231787	0.0117894
ENSG00000075891	PAX2	6.08293	1.79673	18.8224	1.43468e-05	0.000173534
ENSG00000065534	MYLK	6.07881	7.26677	57.3984	3.55903e-14	6.94133e-12
ENSG00000101098	RIMS4	6.07334	4.14835	25.9229	3.55334e-07	8.33711e-06
ENSG00000138646	HERC5	6.06097	5.63095	32.3794	1.26822e-08	4.92995e-07
ENSG00000184347	SLIT3	6.05449	2.74494	18.9906	1.31361e-05	0.000162934
ENSG00000115363	EVA1A	6.04578	4.55759	25.7668	3.85256e-07	8.9487e-06
ENSG00000124212	PTGIS	6.04505	6.42799	10.2704	0.00135181	0.00764203
ENSG00000197614	MFAP5	6.04071	4.56937	12.2512	0.000464959	0.00319152
ENSG00000169946	ZFPM2	6.03159	3.35885	47.1438	6.59642e-12	7.69264e-10
ENSG00000138964	PARVG	6.03074	1.3729	18.4998	1.69925e-05	0.00019919
ENSG00000111305	GSG1	6.0264	1.21595	25.6499	4.09317e-07	9.38129e-06
ENSG00000086991	NOX4	6.02419	-1.17397	11.9459	0.000547684	0.00366809
ENSG00000197467	COL13A1	6.0215	4.1748	22.0126	2.70869e-06	4.38351e-05
ENSG00000171310	CHST11	6.02014	5.94221	32.5415	1.16677e-08	4.59879e-07
ENSG00000113532	ST8SIA4	6.01896	2.22448	13.2205	0.000276903	0.00207852
ENSG00000166793	YPEL4	6.01822	0.890908	48.7351	2.9298e-12	3.72381e-10
ENSG00000166402	TUB	6.01619	3.99298	16.8933	3.95417e-05	0.000408862
ENSG00000105290	APLP1	6.00819	5.54084	37.9842	7.13211e-10	4.13735e-08
ENSG00000185640	KRT79	6.00505	0.525855	20.4698	6.05792e-06	8.66855e-05
ENSG00000166503	HDGFL3	6.00175	6.26197	14.9238	0.000111943	0.000983152
ENSG00000162444	RBP7	5.99856	1.97217	32.0089	1.53464e-08	5.74829e-07
ENSG00000196581	AJAP1	5.98946	-1.07524	14.556	0.000136054	0.0011494
ENSG00000182261	NLRP10	5.98179	2.34173	13.7686	0.000206763	0.00162199
ENSG00000136235	GPNMB	5.97979	6.4407	41.8022	1.00992e-10	7.56569e-09
ENSG00000138650	PCDH10	5.97144	0.20363	11.8499	0.000576646	0.00383256
ENSG00000165821	SALL2	5.96487	3.24223	20.1154	7.29071e-06	0.000101318
ENSG00000170396	ZNF804A	5.95431	1.95735	6.56605	0.0103942	0.0401158
ENSG00000173040	EVC2	5.95315	2.71322	9.80511	0.00174028	0.00933873
ENSG00000182752	PAPPA	5.95288	3.76442	30.8184	2.83341e-08	9.62508e-07
ENSG00000198768	APCDD1L	5.94998	3.77714	11.405	0.000732453	0.00465739
ENSG00000132972	RNF17	5.94912	0.958903	10.2115	0.00139565	0.0078234
ENSG00000092969	TGFB2	5.94874	7.43536	28.8485	7.82683e-08	2.30565e-06
ENSG00000117114	ADGRL2	5.92686	6.47489	26.316	2.89872e-07	7.05167e-06
ENSG00000164318	EGFLAM	5.92238	3.49025	10.0595	0.00151561	0.00834967
ENSG00000189068	VSTM1	5.91041	-0.296101	13.495	0.0002392	0.00183401
ENSG00000196361	ELAVL3	5.90798	-1.16443	22.0162	2.70366e-06	4.38163e-05
ENSG00000008118	CAMK1G	5.90501	0.300924	23.0334	1.5921e-06	2.8362e-05
ENSG00000109705	NKX3-2	5.90456	0.991566	20.6119	5.62446e-06	8.16737e-05
ENSG00000086506	HBQ1	5.90151	-0.0708663	10.4223	0.00124506	0.00716385
ENSG00000168454	TXNDC2	5.90007	-0.468183	32.9022	9.69124e-09	3.9293e-07
ENSG00000187498	COL4A1	5.89704	6.47405	15.2411	9.46237e-05	0.000858367
ENSG00000086288	NME8	5.89207	-1.81151	15.7467	7.24137e-05	0.000683189
ENSG00000130294	KIF1A	5.87804	5.97067	15.8676	6.79315e-05	0.000646836
ENSG00000185008	ROBO2	5.87505	3.96304	13.0896	0.000296945	0.00220121
ENSG00000100368	CSF2RB	5.87485	3.23042	10.058	0.00151685	0.00834967
ENSG00000090104	RGS1	5.86818	-0.0462334	13.3322	0.000260894	0.00197011
ENSG00000157766	ACAN	5.86682	-1.07483	22.2476	2.39654e-06	3.98086e-05
ENSG00000162614	NEXN	5.86166	4.37712	33.1066	8.72437e-09	3.58873e-07
ENSG00000090539	CHRD	5.85449	3.07695	21.7226	3.1505e-06	4.99838e-05
ENSG00000100385	IL2RB	5.85105	0.853245	25.3886	4.68687e-07	1.04572e-05
ENSG00000105989	WNT2	5.84859	0.432464	10.7836	0.00102402	0.00613222
ENSG00000138136	LBX1	5.84467	-0.718129	15.6339	7.68637e-05	0.000717987
ENSG00000011028	MRC2	5.84446	8.3739	25.1624	5.27009e-07	1.14866e-05
ENSG00000126947	ARMCX1	5.84042	3.9194	14.935	0.000111278	0.000978407
ENSG00000149968	MMP3	5.83978	2.31589	15.0275	0.000105957	0.000944508
ENSG00000105255	FSD1	5.82184	3.7103	20.0137	7.68884e-06	0.000105298
ENSG00000120708	TGFBI	5.81791	10.4438	20.7177	5.32212e-06	7.80853e-05
ENSG00000160255	ITGB2	5.8149	4.46849	33.602	6.76228e-09	2.93084e-07
ENSG00000129159	KCNC1	5.80599	0.863988	25.203	5.16011e-07	1.12904e-05
ENSG00000164112	TMEM155	5.79648	-1.36567	7.75224	0.00536461	0.0235029
ENSG00000136327	NKX2-8	5.79311	0.909814	10.4755	0.00120969	0.00698875
ENSG00000125430	HS3ST3B1	5.79052	3.54665	23.1344	1.51066e-06	2.75623e-05
ENSG00000115380	EFEMP1	5.79051	6.78279	8.62549	0.00331491	0.0159093
ENSG00000225614	ZNF469	5.78969	3.02416	28.7552	8.21297e-08	2.39446e-06
ENSG00000179673	RPRML	5.78684	-0.91574	17.7769	2.48377e-05	0.000275725
ENSG00000034239	EFCAB1	5.78444	-1.53229	12.3889	0.000431895	0.00300652
ENSG00000214338	SOGA3	5.78304	3.11716	25.046	5.59801e-07	1.20619e-05
ENSG00000166448	TMEM130	5.7813	2.52996	9.09752	0.00255957	0.0128228
ENSG00000142698	C1orf94	5.77565	-1.74477	8.3138	0.0039345	0.0182108
ENSG00000187957	DNER	5.77554	5.41882	15.5092	8.21057e-05	0.000757569
ENSG00000213023	SYT3	5.76716	1.29402	13.9445	0.000188289	0.00149544
ENSG00000156535	CD109	5.7653	7.93903	37.5013	9.13542e-10	5.06568e-08
ENSG00000092096	SLC22A17	5.76005	3.43336	10.5264	0.0011768	0.00686182
ENSG00000183688	RFLNB	5.75819	5.51152	21.1543	4.23745e-06	6.4083e-05
ENSG00000154548	SRSF12	5.74299	2.05649	21.3948	3.73776e-06	5.76087e-05
ENSG00000166592	RRAD	5.73218	4.99558	29.6406	5.20039e-08	1.63408e-06
ENSG00000044524	EPHA3	5.7321	2.98576	12.9136	0.000326207	0.00238684
ENSG00000170577	SIX2	5.73117	2.88723	16.9025	3.93494e-05	0.00040762
ENSG00000184702	SEPTIN5	5.72946	5.07701	33.2114	8.26653e-09	3.45059e-07
ENSG00000134853	PDGFRA	5.72494	7.98952	6.601	0.0101921	0.0395789
ENSG00000171608	PIK3CD	5.72391	5.72563	46.3546	9.86766e-12	1.1275e-09
ENSG00000151834	GABRA2	5.7226	1.70994	8.58636	0.00338691	0.016193
ENSG00000139200	PIANP	5.72195	2.4749	42.5473	6.89948e-11	5.34568e-09
ENSG00000196104	SPOCK3	5.71889	-1.25418	6.43506	0.0111889	0.0425586
ENSG00000046889	PREX2	5.71498	-0.802858	6.77586	0.00923987	0.0366228
ENSG00000116962	NID1	5.71111	7.26195	15.6191	7.74679e-05	0.000722437
ENSG00000204262	COL5A2	5.70905	9.22558	22.8798	1.72452e-06	3.00582e-05
ENSG00000148541	FAM13C	5.70587	1.22709	27.1316	1.9007e-07	4.87545e-06
ENSG00000177508	IRX3	5.68996	3.50995	22.6612	1.93227e-06	3.3118e-05
ENSG00000189369	GSPT2	5.68633	3.73664	8.48195	0.00358688	0.0169745
ENSG00000111913	RIPOR2	5.68453	3.18417	16.351	5.2629e-05	0.000522686
ENSG00000073754	CD5L	5.68151	-1.8977	23.0416	1.58531e-06	2.82855e-05
ENSG00000150625	GPM6A	5.67604	0.829502	23.8695	1.03092e-06	2.01065e-05
ENSG00000189350	TOGARAM2	5.65352	2.84885	32.7975	1.02278e-08	4.08823e-07
ENSG00000140285	FGF7	5.64443	1.13744	14.0417	0.0001788	0.0014304
ENSG00000152578	GRIA4	5.64419	0.270315	27.5217	1.55342e-07	4.05827e-06
ENSG00000159248	GJD2	5.63675	-1.93623	6.9788	0.00824808	0.0333104
ENSG00000164900	GBX1	5.62802	-1.92936	15.9572	6.47903e-05	0.000622223
ENSG00000158104	HPD	5.62543	1.17576	23.7174	1.11568e-06	2.14637e-05
ENSG00000108001	EBF3	5.62093	0.914764	24.0657	9.31061e-07	1.84775e-05
ENSG00000104177	MYEF2	5.6184	4.8348	10.6208	0.00111826	0.00656446
ENSG00000189320	FAM180A	5.6179	-0.54703	20.4328	6.1762e-06	8.75955e-05
ENSG00000163909	HEYL	5.61683	2.1613	17.6193	2.69835e-05	0.000297502
ENSG00000140379	BCL2A1	5.61454	0.330547	14.6158	0.000131806	0.00112189
ENSG00000184905	TCEAL2	5.61213	-1.83114	14.4317	0.000145337	0.0012153
ENSG00000242732	RTL5	5.60931	2.98712	24.2779	8.33896e-07	1.68147e-05
ENSG00000164756	SLC30A8	5.60836	0.394717	7.09296	0.00773875	0.0317292
ENSG00000215644	GCGR	5.60813	0.189202	8.05268	0.00454363	0.0205098
ENSG00000204186	ZDBF2	5.60373	5.36124	18.5836	1.62615e-05	0.000192396
ENSG00000144935	TRPC1	5.58635	4.5741	35.0729	3.17585e-09	1.51583e-07
ENSG00000078596	ITM2A	5.58397	1.50088	9.05115	0.0026253	0.0130768
ENSG00000157554	ERG	5.58345	-0.536119	12.5666	0.000392696	0.0027781
ENSG00000164176	EDIL3	5.58093	7.10683	10.6017	0.00112981	0.00661855
ENSG00000109943	CRTAM	5.57551	-0.336219	17.0846	3.57511e-05	0.000375852
ENSG00000162733	DDR2	5.57348	5.43159	41.2599	1.33276e-10	9.54188e-09
ENSG00000172403	SYNPO2	5.56912	2.89215	22.4413	2.16659e-06	3.64168e-05
ENSG00000171246	NPTX1	5.56555	3.79453	12.4069	0.00042776	0.00298324
ENSG00000143768	LEFTY2	5.56287	-1.938	12.5637	0.000393322	0.00278078
ENSG00000106689	LHX2	5.56116	2.85127	10.9873	0.000917384	0.00560943
ENSG00000078549	ADCYAP1R1	5.56022	-1.10645	10.0191	0.00154924	0.0084826
ENSG00000005243	COPZ2	5.55994	3.29288	25.9194	3.55978e-07	8.33711e-06
ENSG00000154493	C10orf90	5.54821	-1.40615	28.0891	1.15855e-07	3.18095e-06
ENSG00000197353	LYPD2	5.54587	2.98954	12.2702	0.000460239	0.0031668
ENSG00000197769	MAP1LC3C	5.54301	-1.90137	35.6705	2.33675e-09	1.17097e-07
ENSG00000152092	ASTN1	5.53433	1.35017	8.3892	0.00377457	0.0176511
ENSG00000095596	CYP26A1	5.53301	2.88908	29.5547	5.43615e-08	1.69404e-06
ENSG00000163145	C1QTNF7	5.53058	-2.02353	10.1113	0.00147365	0.00815158
ENSG00000164853	UNCX	5.52774	-1.98344	10.2181	0.0013907	0.00780339
ENSG00000141433	ADCYAP1	5.5264	-1.99596	18.9429	1.34693e-05	0.000166337
ENSG00000171724	VAT1L	5.52417	0.0437646	12.403	0.000428635	0.0029875
ENSG00000049249	TNFRSF9	5.5234	2.91825	26.5943	2.50987e-07	6.25367e-06
ENSG00000136274	NACAD	5.52264	3.20031	25.4893	4.44836e-07	1.00171e-05
ENSG00000172733	PURG	5.51776	-0.250567	19.4765	1.01843e-05	0.000132571
ENSG00000105246	EBI3	5.51756	2.21717	16.6636	4.46303e-05	0.000454826
ENSG00000140945	CDH13	5.49434	4.57195	8.9867	0.00271952	0.0134337
ENSG00000131094	C1QL1	5.48689	4.07841	24.5278	7.32455e-07	1.50373e-05
ENSG00000172346	CSDC2	5.48024	2.22952	21.4483	3.63491e-06	5.62491e-05
ENSG00000183580	FBXL7	5.47205	2.9773	9.5671	0.00198095	0.0103888
ENSG00000177791	MYOZ1	5.45691	-0.988307	20.4297	6.18614e-06	8.75955e-05
ENSG00000197471	SPN	5.45496	1.9236	22.6258	1.9682e-06	3.3581e-05
ENSG00000120088	CRHR1	5.44959	0.139991	18.5238	1.67796e-05	0.000197104
ENSG00000184497	TMEM255B	5.44903	1.16632	30.0996	4.10424e-08	1.33796e-06
ENSG00000135454	B4GALNT1	5.44599	5.79253	18.6103	1.60349e-05	0.000190332
ENSG00000177575	CD163	5.44004	0.49266	14.4787	0.00014175	0.0011904
ENSG00000143512	HHIPL2	5.43991	2.94264	33.7177	6.37171e-09	2.79367e-07
ENSG00000139910	NOVA1	5.43884	1.24834	8.6675	0.00323935	0.0156063
ENSG00000143028	SYPL2	5.42952	2.96821	15.7025	7.41252e-05	0.000694701
ENSG00000185070	FLRT2	5.42494	5.11532	7.67117	0.00561102	0.0243747
ENSG00000154678	PDE1C	5.42392	6.16424	13.6756	0.000217259	0.00169026
ENSG00000175946	KLHL38	5.42133	-0.970696	25.8446	3.70035e-07	8.61284e-06
ENSG00000137672	TRPC6	5.41696	2.66147	11.8311	0.000582494	0.00386235
ENSG00000170516	COX7B2	5.41561	1.01486	6.16433	0.0130352	0.0479994
ENSG00000111817	DSE	5.41338	7.1483	58.0153	2.6009e-14	5.5512e-12
ENSG00000077943	ITGA8	5.40593	-2.03636	10.0851	0.00149471	0.00824388
ENSG00000168477	TNXB	5.40274	7.06794	23.0692	1.56272e-06	2.8095e-05
ENSG00000095752	IL11	5.39957	4.32417	50.3308	1.29898e-12	1.77036e-10
ENSG00000164694	FNDC1	5.39715	-1.09885	8.1539	0.00429686	0.0195756
ENSG00000091656	ZFHX4	5.39609	5.18501	17.4554	2.9412e-05	0.000318828
ENSG00000041982	TNC	5.39321	7.86811	20.1493	7.16255e-06	9.99048e-05
ENSG00000181323	SPEM1	5.38812	-2.04726	18.1521	2.03943e-05	0.00023303
ENSG00000113739	STC2	5.38381	8.05818	13.9215	0.000190605	0.00150989
ENSG00000123119	NECAB1	5.37753	1.20908	23.3305	1.36421e-06	2.52156e-05
ENSG00000020181	ADGRA2	5.37305	4.96235	37.7627	7.98949e-10	4.52949e-08
ENSG00000110076	NRXN2	5.36367	3.58618	16.5875	4.64553e-05	0.000470038
ENSG00000172986	GXYLT2	5.36203	3.95328	19.9149	8.09683e-06	0.000108977
ENSG00000189001	SBSN	5.35991	2.30269	26.45	2.70442e-07	6.6361e-06
ENSG00000182583	VCX	5.35767	1.87504	7.63523	0.00572391	0.0248057
ENSG00000178403	NEUROG2	5.35459	-0.357953	12.7449	0.000356986	0.00256721
ENSG00000123243	ITIH5	5.34762	3.45916	7.05758	0.00789305	0.0321868
ENSG00000198846	TOX	5.34588	4.90649	12.1219	0.000498336	0.00337757
ENSG00000162892	IL24	5.34089	2.23743	21.4881	3.56028e-06	5.53213e-05
ENSG00000175356	SCUBE2	5.34074	2.86385	24.5325	7.3068e-07	1.50281e-05
ENSG00000174348	PODN	5.33798	-0.100513	9.81826	0.00172788	0.00928979
ENSG00000189127	ANKRD34B	5.33352	0.44979	8.27609	0.00401706	0.0185336
ENSG00000153132	CLGN	5.33287	5.17846	23.4784	1.26325e-06	2.36196e-05
ENSG00000183798	EMILIN3	5.33116	2.2082	21.155	4.23585e-06	6.4083e-05
ENSG00000136244	IL6	5.3292	2.9682	14.7403	0.000123383	0.00106705
ENSG00000084628	NKAIN1	5.32724	1.88342	20.8324	5.0127e-06	7.43167e-05
ENSG00000169744	LDB2	5.32475	3.07504	10.226	0.00138473	0.00778405
ENSG00000198326	TMEM239	5.32116	-2.0416	23.7994	1.06917e-06	2.07808e-05
ENSG00000173838	MARCHF10	5.31703	0.128774	13.7849	0.000204982	0.00161361
ENSG00000111249	CUX2	5.3163	0.993327	19.2005	1.17684e-05	0.000149075
ENSG00000172915	NBEA	5.30619	4.37962	22.9271	1.68259e-06	2.9555e-05
ENSG00000102802	MEDAG	5.30328	-1.53243	12.0283	0.000523988	0.00353239
ENSG00000136630	HLX	5.29502	3.00714	34.0147	5.4697e-09	2.47493e-07
ENSG00000064300	NGFR	5.29328	2.44975	23.1667	1.48548e-06	2.71467e-05
ENSG00000164483	SAMD3	5.27891	0.988046	9.27555	0.00232233	0.0118069
ENSG00000137691	CFAP300	5.27152	4.78079	11.7262	0.000616268	0.00403581
ENSG00000131409	LRRC4B	5.26769	2.14094	19.4338	1.0415e-05	0.000134645
ENSG00000182326	C1S	5.26569	5.27237	53.0565	3.24086e-13	5.39127e-11
ENSG00000145536	ADAMTS16	5.26448	3.39239	17.1405	3.47144e-05	0.000366955
ENSG00000163531	NFASC	5.26095	3.2032	25.8584	3.67407e-07	8.56929e-06
ENSG00000168546	GFRA2	5.26086	-1.14343	7.47959	0.00624021	0.0266274
ENSG00000133937	GSC	5.25707	0.37624	7.80146	0.00522042	0.0229891
ENSG00000161681	SHANK1	5.25308	0.701842	26.5812	2.52685e-07	6.28213e-06
ENSG00000013016	EHD3	5.2512	3.69783	24.2097	8.63939e-07	1.73131e-05
ENSG00000123685	BATF3	5.24558	2.50168	35.5914	2.43359e-09	1.21272e-07
ENSG00000104313	EYA1	5.24311	1.66698	14.7152	0.000125032	0.0010783
ENSG00000175175	PPM1E	5.24297	1.50983	10.9454	0.000938347	0.00570739
ENSG00000253953	PCDHGB4	5.24254	2.21586	17.4753	2.91072e-05	0.000316292
ENSG00000126467	TSKS	5.24056	-1.17926	9.1758	0.00245236	0.0123568
ENSG00000074317	SNCB	5.24031	0.296804	18.7336	1.50313e-05	0.000180311
ENSG00000162511	LAPTM5	5.23846	2.6479	32.3818	1.26669e-08	4.92995e-07
ENSG00000124191	TOX2	5.23285	3.83999	25.0948	5.4581e-07	1.1828e-05
ENSG00000104723	TUSC3	5.22914	6.0783	16.628	4.54756e-05	0.000462193
ENSG00000181104	F2R	5.22511	7.03227	22.8181	1.78079e-06	3.09436e-05
ENSG00000152952	PLOD2	5.21434	8.71759	13.8388	0.000199183	0.00157233
ENSG00000100505	TRIM9	5.21306	2.2577	29.2594	6.33098e-08	1.92e-06
ENSG00000205795	CYS1	5.20881	2.3952	16.8211	4.10734e-05	0.000422925
ENSG00000139973	SYT16	5.20839	0.0645119	19.1273	1.2228e-05	0.000153693
ENSG00000112541	PDE10A	5.19861	3.6797	15.8582	6.82703e-05	0.000648969
ENSG00000180509	KCNE1	5.19657	0.891568	15.5706	7.9479e-05	0.000736991
ENSG00000184185	KCNJ12	5.19091	3.91573	14.2995	0.000155906	0.00128514
ENSG00000116254	CHD5	5.18965	4.17107	35.8441	2.1375e-09	1.09697e-07
ENSG00000162494	LRRC38	5.1883	-0.724819	14.084	0.000174828	0.00140558
ENSG00000163637	PRICKLE2	5.18481	4.63062	14.4505	0.000143889	0.00120747
ENSG00000205642	VCX3B	5.18319	2.74688	6.75617	0.00934242	0.0369532
ENSG00000157542	KCNJ6	5.18067	-0.167472	16.6135	4.58233e-05	0.000464891
ENSG00000196071	OR2L13	5.17067	-2.13856	6.60706	0.0101575	0.0394717
ENSG00000185652	NTF3	5.16914	1.12634	10.2254	0.00138519	0.00778405
ENSG00000135604	STX11	5.16376	1.90217	21.4715	3.59132e-06	5.5727e-05
ENSG00000101210	EEF1A2	5.16362	8.30908	16.0502	6.16844e-05	0.000597879
ENSG00000114270	COL7A1	5.16178	7.34243	39.5534	3.19208e-10	2.05164e-08
ENSG00000146910	CNPY1	5.1561	-0.529126	6.56912	0.0103764	0.0400742
ENSG00000104368	PLAT	5.15454	7.4981	24.7518	6.52071e-07	1.36597e-05
ENSG00000165071	TMEM71	5.15308	0.4786	18.6538	1.56735e-05	0.000186827
ENSG00000250366	TUNAR	5.14979	-1.62617	8.42607	0.00369879	0.0173757
ENSG00000196876	SCN8A	5.14916	4.71794	59.353	1.31777e-14	3.10555e-12
ENSG00000136352	NKX2-1	5.14429	3.29717	7.94095	0.00483285	0.0215572
ENSG00000166073	GPR176	5.13672	6.71645	19.903	8.1473e-06	0.000109197
ENSG00000129675	ARHGEF6	5.13311	2.48672	25.1523	5.29765e-07	1.15244e-05
ENSG00000167157	PRRX2	5.13112	2.9502	13.0992	0.000295424	0.00219137
ENSG00000112619	PRPH2	5.12413	-0.0509368	20.4361	6.16553e-06	8.75955e-05
ENSG00000160801	PTH1R	5.12261	0.94766	20.6982	5.37659e-06	7.85836e-05
ENSG00000169418	NPR1	5.11564	2.09141	22.935	1.6757e-06	2.94799e-05
ENSG00000167100	SAMD14	5.11248	2.70708	26.8212	2.23178e-07	5.64785e-06
ENSG00000110900	TSPAN11	5.10138	3.37796	18.6202	1.59521e-05	0.000189549
ENSG00000167941	SOST	5.09952	-1.43048	19.1762	1.1919e-05	0.000150142
ENSG00000133107	TRPC4	5.08981	0.737415	9.72007	0.00182267	0.00968436
ENSG00000166342	NETO1	5.0837	-2.09599	21.6291	3.30794e-06	5.22617e-05
ENSG00000166707	ZCCHC18	5.08289	0.170357	21.0927	4.37593e-06	6.58251e-05
ENSG00000118113	MMP8	5.08155	-1.43735	12.505	0.000405864	0.00284987
ENSG00000018625	ATP1A2	5.08151	0.144159	21.2725	3.98414e-06	6.10686e-05
ENSG00000129170	CSRP3	5.08074	-1.60898	19.3873	1.06713e-05	0.000137802
ENSG00000126950	TMEM35A	5.07136	0.228692	6.35109	0.0117309	0.0441452
ENSG00000182492	BGN	5.06742	2.39223	14.6696	0.000128096	0.00109857
ENSG00000143869	GDF7	5.05972	-0.306279	11.2954	0.000777009	0.00490487
ENSG00000198796	ALPK2	5.04607	5.26136	13.7363	0.000210355	0.00164332
ENSG00000153789	FAM92B	5.03465	-2.1735	18.5632	1.64366e-05	0.000193753
ENSG00000185052	SLC24A3	5.03372	2.64179	12.0217	0.000525859	0.00354078
ENSG00000065609	SNAP91	5.03332	-0.261025	6.37896	0.0115481	0.0436787
ENSG00000173706	HEG1	5.03175	7.99977	34.6252	3.99688e-09	1.86829e-07
ENSG00000007237	GAS7	5.03063	4.50667	18.4487	1.74544e-05	0.000203132
ENSG00000258713	C20orf141	5.0233	-2.07098	24.042	9.42546e-07	1.864e-05
ENSG00000143515	ATP8B2	5.01655	6.27537	36.5095	1.51925e-09	8.10651e-08
ENSG00000159164	SV2A	5.01356	4.15402	19.4731	1.02024e-05	0.000132655
ENSG00000143340	FAM163A	5.01311	-1.38531	9.44966	0.00211188	0.0109284
ENSG00000171860	C3AR1	5.00962	-0.948758	22.7304	1.86393e-06	3.21925e-05
ENSG00000149654	CDH22	5.00895	-0.811855	10.5381	0.00116936	0.00683624
ENSG00000117245	KIF17	5.00585	2.29161	40.4393	2.02819e-10	1.36565e-08
ENSG00000109944	JHY	5.00498	4.00409	16.8555	4.03369e-05	0.000416324
ENSG00000243244	STON1	5.00467	3.95618	44.7127	2.28175e-11	2.2251e-09
ENSG00000105889	STEAP1B	5.00065	2.71948	9.97423	0.00158747	0.00866034
ENSG00000123094	RASSF8	4.99863	7.4429	13.0805	0.000298385	0.00220754
ENSG00000182916	TCEAL7	4.99631	0.317855	9.0523	0.00262365	0.0130743
ENSG00000176956	LY6H	4.99182	2.0143	7.9772	0.00473702	0.0212134
ENSG00000080709	KCNN2	4.98752	-0.469366	19.2076	1.17247e-05	0.000148688
ENSG00000196368	NUDT11	4.98235	1.89	6.36251	0.0116556	0.0440051
ENSG00000135074	ADAM19	4.9786	5.97766	28.0226	1.19904e-07	3.27622e-06
ENSG00000177143	CETN1	4.97774	-2.18782	6.54145	0.010539	0.0405499
ENSG00000140795	MYLK3	4.96422	1.47769	21.5107	3.51859e-06	5.48241e-05
ENSG00000163453	IGFBP7	4.96245	6.61412	20.4971	5.97223e-06	8.57333e-05
ENSG00000050628	PTGER3	4.96181	0.242173	11.2103	0.000813457	0.00508108
ENSG00000134775	FHOD3	4.96073	4.93752	45.4074	1.6003e-11	1.67616e-09
ENSG00000184486	POU3F2	4.95672	1.17687	12.6944	0.000366754	0.0026208
ENSG00000186462	NAP1L2	4.95178	2.58624	10.2166	0.0013918	0.00780565
ENSG00000106333	PCOLCE	4.95122	6.22673	37.7581	8.00829e-10	4.52949e-08
ENSG00000166963	MAP1A	4.94997	4.97191	28.7859	8.0836e-08	2.36977e-06
ENSG00000122707	RECK	4.9489	3.99363	15.7264	7.31936e-05	0.000687679
ENSG00000129244	ATP1B2	4.94553	1.08929	13.773	0.000206284	0.00162047
ENSG00000173432	SAA1	4.94498	5.5135	12.0264	0.000524526	0.00353391
ENSG00000175040	CHST2	4.94384	2.24816	11.6167	0.00065364	0.00423481
ENSG00000148600	CDHR1	4.94142	0.491794	9.72989	0.00181296	0.0096509
ENSG00000172985	SH3RF3	4.93907	4.01756	18.7743	1.47137e-05	0.000177065
ENSG00000186297	GABRA5	4.93321	-0.733664	7.73879	0.0054047	0.0236419
ENSG00000138311	ZNF365	4.92922	2.85766	16.6427	4.51232e-05	0.000459023
ENSG00000168917	SLC35G2	4.91605	4.24205	28.1062	1.14836e-07	3.16679e-06
ENSG00000101463	SYNDIG1	4.91601	-2.18701	10.6084	0.00112577	0.00659829
ENSG00000100154	TTC28	4.91081	5.11366	26.1328	3.18725e-07	7.59035e-06
ENSG00000113389	NPR3	4.89767	3.5874	14.3647	0.000150598	0.00124712
ENSG00000144285	SCN1A	4.89597	-0.798963	11.5193	0.000688772	0.00441689
ENSG00000184922	FMNL1	4.89119	5.5155	66.3187	3.83608e-16	1.27629e-13
ENSG00000133124	IRS4	4.88899	-1.95667	15.3316	9.01968e-05	0.000820182
ENSG00000023902	PLEKHO1	4.88613	4.87072	46.041	1.15806e-11	1.28431e-09
ENSG00000166432	ZMAT1	4.88353	0.731292	14.0889	0.000174372	0.00140391
ENSG00000133401	PDZD2	4.87842	4.93376	43.6165	3.99462e-11	3.46977e-09
ENSG00000169181	GSG1L	4.87256	-0.339871	13.1724	0.000284097	0.00212266
ENSG00000115468	EFHD1	4.8715	3.69448	14.2935	0.000156401	0.00128764
ENSG00000025039	RRAGD	4.87098	5.32276	15.7625	7.18123e-05	0.000679394
ENSG00000071246	VASH1	4.86005	4.4318	43.5901	4.04889e-11	3.46977e-09
ENSG00000168140	VASN	4.85433	6.11829	20.7445	5.24835e-06	7.73038e-05
ENSG00000145863	GABRA6	4.85289	-2.28131	6.25537	0.0123817	0.0460276
ENSG00000154783	FGD5	4.84955	4.00911	8.475	0.0036006	0.0170204
ENSG00000185532	PRKG1	4.83915	4.04722	17.4477	2.95315e-05	0.000319439
ENSG00000174099	MSRB3	4.83822	5.98022	10.0555	0.00151891	0.00835695
ENSG00000106018	VIPR2	4.83774	-1.25926	11.8273	0.000583677	0.00386567
ENSG00000184985	SORCS2	4.83643	3.19131	24.8171	6.30342e-07	1.32783e-05
ENSG00000165379	LRFN5	4.83381	-1.44376	11.0477	0.000887969	0.00545908
ENSG00000164330	EBF1	4.83104	1.7114	6.83177	0.00895505	0.0356312
ENSG00000149131	SERPING1	4.82648	3.76968	10.5572	0.00115736	0.00677643
ENSG00000187037	GPR141	4.82558	-2.12903	13.3258	0.000261776	0.00197414
ENSG00000187688	TRPV2	4.82384	5.19832	20.6154	5.61435e-06	8.16317e-05
ENSG00000170961	HAS2	4.82202	6.19426	9.64499	0.00189869	0.0100084
ENSG00000133687	TMTC1	4.81851	6.26992	14.0096	0.000181878	0.00145194
ENSG00000197380	DACT3	4.81589	2.10647	22.4559	2.15019e-06	3.62461e-05
ENSG00000250510	GPR162	4.80983	1.5506	23.2656	1.41105e-06	2.59963e-05
ENSG00000155980	KIF5A	4.80843	2.38835	16.1517	5.84652e-05	0.0005731
ENSG00000164197	RNF180	4.80186	0.132061	13.5966	0.000226594	0.00175272
ENSG00000165495	PKNOX2	4.79739	0.527027	16.6704	4.44694e-05	0.000454006
ENSG00000151967	SCHIP1	4.79643	2.17652	33.1777	8.41099e-09	3.48517e-07
ENSG00000000971	CFH	4.79397	3.91365	16.1201	5.94507e-05	0.000580247
ENSG00000158458	NRG2	4.79196	1.1109	19.2092	1.17147e-05	0.000148688
ENSG00000134871	COL4A2	4.78757	7.23058	28.856	7.79636e-08	2.30267e-06
ENSG00000171517	LPAR3	4.78365	0.988848	10.26	0.00135944	0.00766979
ENSG00000145794	MEGF10	4.78061	0.741513	21.6022	3.35459e-06	5.28512e-05
ENSG00000185686	PRAME	4.7801	6.39502	9.06533	0.00260502	0.0130101
ENSG00000204655	MOG	4.77927	-1.61778	10.28	0.00134479	0.00760991
ENSG00000198771	RCSD1	4.77886	-1.08008	27.6113	1.48307e-07	3.91059e-06
ENSG00000171357	LURAP1	4.77465	0.851796	18.7862	1.46219e-05	0.000176148
ENSG00000128573	FOXP2	4.77252	1.82296	15.5166	8.17851e-05	0.000755844
ENSG00000171016	PYGO1	4.76855	4.7907	13.5119	0.000237061	0.00182288
ENSG00000170801	HTRA3	4.76747	3.55707	8.79802	0.00301557	0.0146902
ENSG00000137726	FXYD6	4.76633	2.91244	13.1318	0.00029033	0.00216066
ENSG00000160013	PTGIR	4.76348	-1.39569	19.9969	7.75676e-06	0.000105972
ENSG00000253304	TMEM200B	4.75935	4.0514	18.0155	2.19116e-05	0.000247864
ENSG00000110811	P3H3	4.75653	5.87576	12.2191	0.000473017	0.00323816
ENSG00000145861	C1QTNF2	4.75117	0.268751	19.293	1.12115e-05	0.000143467
ENSG00000160111	CPAMD8	4.7503	3.45464	18.445	1.74882e-05	0.000203316
ENSG00000146674	IGFBP3	4.74966	10.5957	9.18115	0.0024452	0.0123318
ENSG00000256980	KHDC1L	4.74609	0.561313	13.5485	0.000232477	0.00179018
ENSG00000182450	KCNK4	4.74497	-1.31609	8.53661	0.00348073	0.0165506
ENSG00000169085	VXN	4.73852	1.33369	44.1003	3.11967e-11	2.84594e-09
ENSG00000170891	CYTL1	4.72981	-2.27335	13.6368	0.000221797	0.00171847
ENSG00000169604	ANTXR1	4.72902	6.91966	9.36377	0.00221316	0.0113436
ENSG00000159251	ACTC1	4.72878	-1.1613	12.1127	0.000500786	0.00339215
ENSG00000198542	ITGBL1	4.72589	4.06366	18.9953	1.31041e-05	0.000162934
ENSG00000182218	HHIPL1	4.71458	2.10681	19.3252	1.10239e-05	0.000141226
ENSG00000116981	NT5C1A	4.7097	-2.25801	14.8332	0.000117452	0.00102123
ENSG00000171695	LKAAEAR1	4.70956	-1.37844	11.5607	0.0006736	0.00433434
ENSG00000198844	ARHGEF15	4.7093	-1.87219	11.0619	0.000881212	0.00542934
ENSG00000174059	CD34	4.70647	-0.737674	26.261	2.98246e-07	7.23094e-06
ENSG00000145040	UCN2	4.70632	1.58202	23.0108	1.61091e-06	2.86069e-05
ENSG00000147509	RGS20	4.70273	3.62589	17.8958	2.33332e-05	0.000261332
ENSG00000133661	SFTPD	4.69976	-0.570369	20.6593	5.48695e-06	8.00882e-05
ENSG00000116544	DLGAP3	4.68864	1.56209	16.7183	4.33604e-05	0.000443483
ENSG00000175287	PHYHD1	4.68467	2.06514	11.649	0.000642372	0.00417376
ENSG00000147614	ATP6V0D2	4.6749	2.51155	10.5025	0.00119212	0.00692265
ENSG00000054356	PTPRN	4.67231	0.358806	17.8801	2.35268e-05	0.00026324
ENSG00000129450	SIGLEC9	4.67126	-1.56678	10.651	0.00110012	0.00647818
ENSG00000171533	MAP6	4.67051	1.93439	21.6055	3.34887e-06	5.28345e-05
ENSG00000118596	SLC16A7	4.66715	3.42607	6.95623	0.00835278	0.0336491
ENSG00000147573	TRIM55	4.66372	0.551876	14.7147	0.000125065	0.0010783
ENSG00000100362	PVALB	4.65912	-1.84425	7.27074	0.00700868	0.0292123
ENSG00000140931	CMTM3	4.6535	5.78602	20.4143	6.23613e-06	8.81788e-05
ENSG00000162711	NLRP3	4.65342	2.99803	16.323	5.34108e-05	0.000527957
ENSG00000172399	MYOZ2	4.65259	-1.21189	9.46717	0.00209182	0.0108395
ENSG00000206538	VGLL3	4.65144	5.61749	7.40544	0.00650269	0.0275089
ENSG00000139971	ARMH4	4.65019	2.30459	38.4183	5.70937e-10	3.39918e-08
ENSG00000124493	GRM4	4.64981	1.7292	14.9965	0.000107709	0.000954043
ENSG00000214402	LCNL1	4.64033	1.83212	7.13944	0.00754065	0.0310633
ENSG00000161638	ITGA5	4.63829	7.71039	19.2726	1.13322e-05	0.000144847
ENSG00000184226	PCDH9	4.63812	4.05468	7.21718	0.00722089	0.0299863
ENSG00000168461	RAB31	4.635	6.92065	16.5406	4.762e-05	0.000478898
ENSG00000154277	UCHL1	4.63067	6.60908	6.65971	0.00986172	0.0385739
ENSG00000158859	ADAMTS4	4.62781	1.55952	13.4059	0.000250831	0.00190814
ENSG00000188763	FZD9	4.62738	2.23361	11.7502	0.000608374	0.00399184
ENSG00000089199	CHGB	4.6206	1.42422	12.6763	0.000370328	0.00264467
ENSG00000175183	CSRP2	4.61968	4.56815	21.2092	4.11776e-06	6.26919e-05
ENSG00000130775	THEMIS2	4.61678	3.96056	21.1861	4.16785e-06	6.32842e-05
ENSG00000105642	KCNN1	4.61671	1.36665	23.2534	1.41997e-06	2.61183e-05
ENSG00000000938	FGR	4.61549	0.169279	10.9133	0.000954766	0.00578175
ENSG00000168671	UGT3A2	4.60438	-1.20678	8.56179	0.00343291	0.0163805
ENSG00000013293	SLC7A14	4.6005	-1.31968	14.8842	0.000114316	0.00100061
ENSG00000129910	CDH15	4.59986	2.04832	13.0174	0.000308613	0.00227512
ENSG00000203685	STUM	4.59767	-1.55112	10.9391	0.000941548	0.00571893
ENSG00000095713	CRTAC1	4.58691	0.0913847	10.4247	0.00124343	0.00716175
ENSG00000262874	C19orf84	4.58397	-0.564482	9.71746	0.00182525	0.00969356
ENSG00000160838	LRRC71	4.57809	-0.553849	22.3284	2.29789e-06	3.82823e-05
ENSG00000106714	CNTNAP3	4.57555	3.19325	10.5176	0.00118242	0.00689103
ENSG00000128656	CHN1	4.5598	4.70554	25.6482	4.09685e-07	9.38129e-06
ENSG00000164484	TMEM200A	4.5564	4.84158	7.81659	0.00517689	0.0228606
ENSG00000181458	TMEM45A	4.55516	4.67229	22.1819	2.48006e-06	4.08956e-05
ENSG00000136960	ENPP2	4.55235	2.83492	10.1223	0.00146482	0.0081186
ENSG00000105419	MEIS3	4.54808	5.06986	14.0463	0.000178362	0.00142791
ENSG00000218336	TENM3	4.54718	7.73478	9.38783	0.00218431	0.0112313
ENSG00000236609	ZNF853	4.54161	3.45867	17.3661	3.08274e-05	0.000331482
ENSG00000185585	OLFML2A	4.5381	6.02798	13.4942	0.000239303	0.00183401
ENSG00000145708	CRHBP	4.53564	-1.91003	18.8469	1.41641e-05	0.00017247
ENSG00000174611	KY	4.53452	0.307444	11.7967	0.000593347	0.00390911
ENSG00000188626	GOLGA8M	4.53269	-1.86624	22.1705	2.49477e-06	4.10783e-05
ENSG00000224982	TMEM233	4.52872	-2.36051	8.77872	0.00304764	0.0148268
ENSG00000134242	PTPN22	4.52493	3.47744	14.4022	0.000147629	0.00122873
ENSG00000067842	ATP2B3	4.51511	-0.818524	13.4008	0.000251516	0.00191207
ENSG00000114200	BCHE	4.50726	2.34465	16.5271	4.79604e-05	0.000481819
ENSG00000204482	LST1	4.50567	-1.6911	17.1389	3.47427e-05	0.000366955
ENSG00000169550	MUC15	4.50181	5.0132	10.0582	0.00151667	0.00834967
ENSG00000135346	CGA	4.49148	4.7326	6.91776	0.00853436	0.0342951
ENSG00000112273	HDGFL1	4.48927	-0.883511	6.68592	0.00971776	0.0381163
ENSG00000155754	C2CD6	4.48175	0.241709	11.5743	0.000668685	0.00430761
ENSG00000172543	CTSW	4.47771	0.221607	19.7629	8.76672e-06	0.000117083
ENSG00000136286	MYO1G	4.47441	2.27445	19.9084	8.12432e-06	0.000109138
ENSG00000012223	LTF	4.4709	0.769142	12.5816	0.000389557	0.00276273
ENSG00000119938	PPP1R3C	4.46661	4.85086	7.8993	0.00494539	0.021964
ENSG00000128591	FLNC	4.463	8.86033	15.2124	9.60729e-05	0.000869422
ENSG00000120051	CFAP58	4.46195	1.76608	26.194	3.08784e-07	7.41443e-06
ENSG00000008056	SYN1	4.45984	1.00034	12.6129	0.000383097	0.00272553
ENSG00000196208	GREB1	4.45951	2.80348	32.8645	9.88121e-09	3.9778e-07
ENSG00000124140	SLC12A5	4.45289	0.7401	22.0298	2.68454e-06	4.36315e-05
ENSG00000151474	FRMD4A	4.45022	5.45643	43.871	3.50744e-11	3.0997e-09
ENSG00000177504	VCX2	4.44722	-1.92955	7.2684	0.00701783	0.0292397
ENSG00000128285	MCHR1	4.4467	-1.43856	6.60811	0.0101515	0.0394619
ENSG00000223802	CERS1	4.44616	2.48766	18.8289	1.42982e-05	0.000173171
ENSG00000100276	RASL10A	4.44563	1.98418	21.1011	4.35683e-06	6.57213e-05
ENSG00000176014	TUBB6	4.44529	8.62045	30.237	3.82347e-08	1.26836e-06
ENSG00000120820	GLT8D2	4.44148	2.03929	30.8746	2.75248e-08	9.43518e-07
ENSG00000110446	SLC15A3	4.43723	3.63019	22.883	1.72166e-06	3.00547e-05
ENSG00000177374	HIC1	4.43448	2.8616	28.5318	9.21704e-08	2.63291e-06
ENSG00000196557	CACNA1H	4.43274	4.65818	10.7817	0.00102509	0.00613537
ENSG00000130226	DPP6	4.43256	-1.34197	10.2919	0.00133614	0.00757236
ENSG00000112769	LAMA4	4.43191	6.4848	11.7484	0.000608954	0.00399333
ENSG00000249992	TMEM158	4.42845	6.0927	21.4083	3.71169e-06	5.73588e-05
ENSG00000171649	ZIK1	4.4252	1.32563	11.7704	0.000601796	0.00395367
ENSG00000124134	KCNS1	4.42505	2.34476	10.9642	0.000928879	0.00566136
ENSG00000115526	CHST10	4.41757	4.22809	10.8565	0.000984509	0.00592696
ENSG00000184986	TMEM121	4.41513	2.5959	18.4762	1.72041e-05	0.000200839
ENSG00000150681	RGS18	4.40592	-2.03681	7.43705	0.00638947	0.0271109
ENSG00000100504	PYGL	4.40578	7.44215	14.2481	0.000160218	0.00131143
ENSG00000179796	LRRC3B	4.40066	-2.193	10.4229	0.00124464	0.00716385
ENSG00000198947	DMD	4.37732	4.99013	14.9676	0.000109373	0.000964325
ENSG00000187672	ERC2	4.37263	0.275661	11.8802	0.00056735	0.00378188
ENSG00000101955	SRPX	4.37116	5.10019	14.4109	0.000146949	0.00122587
ENSG00000255346	NOX5	4.37056	0.404178	23.9835	9.71653e-07	1.91821e-05
ENSG00000173208	ABCD2	4.36933	-1.96432	14.6051	0.000132553	0.0011257
ENSG00000153012	LGI2	4.36804	0.0870498	6.21934	0.0126362	0.0467891
ENSG00000105928	GSDME	4.36673	5.72327	15.5395	8.08009e-05	0.000747359
ENSG00000164220	F2RL2	4.36415	1.55731	9.07313	0.00259392	0.0129719
ENSG00000205832	C16orf96	4.35895	-1.54678	14.203	0.000164113	0.00133557
ENSG00000225968	ELFN1	4.35096	4.86043	18.2928	1.89423e-05	0.000217377
ENSG00000105971	CAV2	4.35067	8.87301	14.6923	0.000126564	0.00108874
ENSG00000221852	KRTAP1-5	4.35025	-0.62938	6.55695	0.0104475	0.0402803
ENSG00000183049	CAMK1D	4.34534	4.91128	12.6985	0.00036595	0.00261671
ENSG00000128714	HOXD13	4.34393	1.31569	7.05817	0.00789047	0.0321868
ENSG00000146530	VWDE	4.34273	2.81154	9.07893	0.00258571	0.0129423
ENSG00000106013	ANKRD7	4.34043	-1.75132	8.09887	0.0044293	0.0200646
ENSG00000162669	HFM1	4.3363	-0.250679	13.3356	0.000260418	0.00196783
ENSG00000058404	CAMK2B	4.32841	1.75737	24.7106	6.66152e-07	1.38978e-05
ENSG00000125869	LAMP5	4.32485	0.617175	6.99902	0.00815542	0.0330305
ENSG00000137285	TUBB2B	4.3224	5.27748	25.733	3.92065e-07	9.06961e-06
ENSG00000122735	DNAI1	4.31877	-0.38566	28.2826	1.04834e-07	2.95321e-06
ENSG00000138738	PRDM5	4.31578	2.94207	7.08516	0.00777249	0.0318099
ENSG00000163823	CCR1	4.31482	2.15882	8.7201	0.0031472	0.0152337
ENSG00000116774	OLFML3	4.31388	4.48653	8.7181	0.00315066	0.0152439
ENSG00000123453	SARDH	4.31169	3.05162	14.2654	0.000158756	0.00130417
ENSG00000068831	RASGRP2	4.30949	2.78343	14.9954	0.000107775	0.000954043
ENSG00000176490	DIRAS1	4.3093	3.55379	14.5783	0.000134455	0.00113759
ENSG00000132535	DLG4	4.30922	5.32655	33.0389	9.03337e-09	3.68901e-07
ENSG00000159433	STARD9	4.30595	4.49436	39.0264	4.18114e-10	2.58454e-08
ENSG00000162365	CYP4A22	4.30266	-2.37072	13.4326	0.000247287	0.00188462
ENSG00000198959	TGM2	4.30083	9.61821	17.0192	3.70047e-05	0.00038616
ENSG00000183549	ACSM5	4.29909	-2.04176	7.46033	0.00630733	0.0268631
ENSG00000176601	MAP3K19	4.29703	-1.74665	15.6539	7.60562e-05	0.000711031
ENSG00000188582	PAQR9	4.29439	-0.983724	9.03291	0.00265162	0.0131766
ENSG00000087258	GNAO1	4.29407	2.22109	8.09347	0.00444251	0.0201095
ENSG00000140030	GPR65	4.29385	3.33188	6.34316	0.0117835	0.0443134
ENSG00000177932	ZNF354C	4.29172	3.94148	10.7952	0.00101763	0.0061004
ENSG00000152454	ZNF256	4.29158	2.74195	7.83996	0.00511037	0.0226434
ENSG00000168772	CXXC4	4.29015	3.74463	8.82441	0.00297228	0.0145112
ENSG00000147650	LRP12	4.28155	6.16382	10.4335	0.00123752	0.00713861
ENSG00000145248	SLC10A4	4.2785	0.946115	13.6834	0.000216358	0.00168441
ENSG00000128510	CPA4	4.27797	5.5289	12.8185	0.000343213	0.00248674
ENSG00000149596	JPH2	4.27729	4.91119	14.5959	0.000133206	0.00112962
ENSG00000163206	SMCP	4.27696	-2.40537	6.39097	0.0114702	0.0434531
ENSG00000182168	UNC5C	4.27288	2.24015	10.3303	0.00130865	0.00745659
ENSG00000188921	HACD4	4.27047	4.02341	14.2094	0.000163551	0.00133196
ENSG00000104921	FCER2	4.26484	-2.14157	8.49085	0.00356937	0.0169011
ENSG00000132386	SERPINF1	4.26403	4.45141	21.5584	3.43223e-06	5.39991e-05
ENSG00000138741	TRPC3	4.26158	-1.37796	9.48442	0.00207224	0.0107677
ENSG00000105696	TMEM59L	4.26081	3.31513	15.453	8.45833e-05	0.000775998
ENSG00000031081	ARHGAP31	4.25924	4.28804	43.5908	4.04736e-11	3.46977e-09
ENSG00000169126	ARMC4	4.2588	1.82142	9.93735	0.00161959	0.00880384
ENSG00000120217	CD274	4.25754	5.58267	31.4168	2.08176e-08	7.55168e-07
ENSG00000112137	PHACTR1	4.25425	2.17298	19.4489	1.03328e-05	0.000133888
ENSG00000204936	CD177	4.25348	2.18723	13.2737	0.000269157	0.0020244
ENSG00000244486	SCARF2	4.24865	5.17807	19.7005	9.05799e-06	0.000120124
ENSG00000100167	SEPTIN3	4.24822	4.20444	18.1497	2.04201e-05	0.00023309
ENSG00000197535	MYO5A	4.24748	6.8073	28.7729	8.13804e-08	2.37875e-06
ENSG00000224940	PRRT4	4.24415	1.14061	8.24489	0.00408669	0.0188183
ENSG00000067798	NAV3	4.24298	4.82848	14.5309	0.000137883	0.00116138
ENSG00000019169	MARCO	4.24294	1.74413	9.34616	0.00223453	0.0114272
ENSG00000070808	CAMK2A	4.23036	-0.538256	14.0969	0.000173632	0.00139995
ENSG00000188916	INSYN2A	4.22951	0.244815	10.6961	0.0010736	0.00636844
ENSG00000179242	CDH4	4.2289	3.24549	24.0503	9.3853e-07	1.85931e-05
ENSG00000196329	GIMAP5	4.22851	-1.65939	8.01053	0.00465061	0.0209285
ENSG00000204624	DISP3	4.22638	-0.155237	13.9669	0.000186057	0.00147905
ENSG00000163815	CLEC3B	4.22599	0.148333	9.04875	0.00262874	0.0130882
ENSG00000090534	THPO	4.22212	-0.608866	11.803	0.000591354	0.00389825
ENSG00000122694	GLIPR2	4.22132	3.9035	11.7255	0.000616503	0.00403581
ENSG00000164619	BMPER	4.22026	2.33466	18.6426	1.57659e-05	0.00018773
ENSG00000121871	SLITRK3	4.2177	-1.35639	6.53563	0.0105735	0.0406412
ENSG00000026751	SLAMF7	4.21019	4.09639	9.53149	0.00201977	0.0105392
ENSG00000130052	STARD8	4.20984	3.36287	16.0232	6.25695e-05	0.000604429
ENSG00000119900	OGFRL1	4.2019	7.0861	15.0977	0.000102086	0.000916503
ENSG00000187492	CDHR4	4.19815	-0.648023	15.4883	8.30183e-05	0.000764742
ENSG00000240583	AQP1	4.19717	6.2066	14.5872	0.000133821	0.00113392
ENSG00000109101	FOXN1	4.19362	1.0177	9.98032	0.00158222	0.00864226
ENSG00000047936	ROS1	4.19303	2.19383	13.5647	0.00023048	0.00177844
ENSG00000149571	KIRREL3	4.18644	2.31689	21.2456	4.04027e-06	6.17615e-05
ENSG00000146090	RASGEF1C	4.18491	1.00489	6.45523	0.0110626	0.0421917
ENSG00000188523	CFAP77	4.1837	-1.27507	14.1263	0.00017094	0.00138021
ENSG00000133101	CCNA1	4.18005	-1.28571	13.7312	0.000210921	0.00164661
ENSG00000185972	CCIN	4.16474	-1.73288	17.8331	2.41154e-05	0.000269293
ENSG00000119919	NKX2-3	4.15519	-0.826128	6.26414	0.0123206	0.0458306
ENSG00000144406	UNC80	4.14821	-1.3426	7.52223	0.00609422	0.0261326
ENSG00000152207	CYSLTR2	4.14675	-1.24013	6.52357	0.0106454	0.0408621
ENSG00000166173	LARP6	4.1364	5.77223	13.7583	0.000207896	0.00162826
ENSG00000255150	EID3	4.1361	2.30265	22.832	1.76801e-06	3.07687e-05
ENSG00000108823	SGCA	4.13561	-0.36067	7.26293	0.00703924	0.0293181
ENSG00000184058	TBX1	4.13467	2.69824	10.3418	0.00130052	0.00742256
ENSG00000168497	CAVIN2	4.13385	3.67928	13.358	0.000257325	0.00194576
ENSG00000145431	PDGFC	4.13173	7.11786	13.3917	0.000252734	0.00191874
ENSG00000137872	SEMA6D	4.12992	2.01656	7.10731	0.00767702	0.0315561
ENSG00000121410	A1BG	4.1241	2.26026	14.2214	0.000162509	0.00132442
ENSG00000221890	NPTXR	4.11809	5.34786	11.0695	0.0008776	0.00542185
ENSG00000169442	CD52	4.11522	-0.07011	8.41624	0.00371885	0.0174337
ENSG00000163075	CFAP221	4.11405	-0.719415	16.7432	4.2795e-05	0.000438891
ENSG00000162426	SLC45A1	4.1135	1.21671	19.6005	9.54427e-06	0.000125833
ENSG00000117598	PLPPR5	4.11089	-2.25799	12.5764	0.000390656	0.0027654
ENSG00000171951	SCG2	4.11032	4.1553	25.4868	4.45421e-07	1.00171e-05
ENSG00000198573	SPANXC	4.10348	-1.17117	6.09215	0.0135783	0.0494203
ENSG00000172350	ABCG4	4.1033	0.539395	19.5168	9.9719e-06	0.000130407
ENSG00000185634	SHC4	4.10086	1.46494	17.2809	3.22416e-05	0.000344723
ENSG00000180155	LYNX1	4.10082	3.93756	12.7781	0.000350693	0.00253161
ENSG00000083814	ZNF671	4.10024	1.75843	14.4401	0.000144688	0.00121328
ENSG00000102038	SMARCA1	4.09925	7.19179	11.0327	0.000895198	0.00549456
ENSG00000127990	SGCE	4.09742	5.99808	10.2483	0.00136813	0.00770286
ENSG00000137965	IFI44	4.09657	5.55548	18.9729	1.32587e-05	0.000164275
ENSG00000214491	SEC14L6	4.09528	-0.73108	14.8391	0.000117085	0.0010196
ENSG00000149289	ZC3H12C	4.09301	6.64379	22.0418	2.66778e-06	4.34841e-05
ENSG00000104848	KCNA7	4.08504	-0.94808	27.8056	1.34136e-07	3.59562e-06
ENSG00000145491	ROPN1L	4.08301	0.443448	24.4679	7.55577e-07	1.54559e-05
ENSG00000185742	C11orf87	4.07752	-2.24042	8.39355	0.00376554	0.0176161
ENSG00000161040	FBXL13	4.07522	3.17252	24.5648	7.18527e-07	1.48051e-05
ENSG00000161973	CCDC42	4.0625	-2.24248	10.3831	0.00127171	0.00729862
ENSG00000250803	AC010255.3	4.06216	-2.43519	8.97696	0.00273405	0.0134937
ENSG00000171488	LRRC8C	4.05839	5.292	32.2912	1.32712e-08	5.07176e-07
ENSG00000163421	PROK2	4.05361	-1.85424	6.69873	0.00964814	0.0379089
ENSG00000180190	TDRP	4.05147	2.68302	14.3982	0.000147944	0.00122957
ENSG00000082293	COL19A1	4.05072	-2.0703	9.53051	0.00202084	0.0105392
ENSG00000166250	CLMP	4.04633	4.74127	8.70626	0.00317119	0.015317
ENSG00000185988	PLK5	4.04001	-0.654239	13.4356	0.000246898	0.00188329
ENSG00000153002	CPB1	4.03609	-1.892	6.54497	0.0105181	0.0405077
ENSG00000115414	FN1	4.03219	12.4161	8.94796	0.00277779	0.0136678
ENSG00000181264	TLCD5	4.02938	4.64138	21.784	3.05135e-06	4.86839e-05
ENSG00000164122	ASB5	4.02933	-1.78901	7.46128	0.006304	0.0268591
ENSG00000147119	CHST7	4.02815	3.4266	44.7707	2.21511e-11	2.17889e-09
ENSG00000180815	MAP3K15	4.02768	1.3176	9.96673	0.00159394	0.00868949
ENSG00000138347	MYPN	4.02722	1.95034	11.1712	0.000830768	0.00516922
ENSG00000140682	TGFB1I1	4.02721	5.56271	29.5946	5.3253e-08	1.66869e-06
ENSG00000100314	CABP7	4.02717	0.721907	44.4817	2.56741e-11	2.4279e-09
ENSG00000145362	ANK2	4.01465	4.29468	13.0155	0.000308927	0.00227512
ENSG00000163431	LMOD1	4.0135	0.972617	18.0794	2.11881e-05	0.000240884
ENSG00000053108	FSTL4	4.00833	3.6441	8.59927	0.00336298	0.0160922
ENSG00000171444	MCC	4.00761	4.69232	29.5326	5.49832e-08	1.70011e-06
ENSG00000049192	ADAMTS6	4.00355	6.12101	12.8026	0.00034614	0.00250514
ENSG00000101445	PPP1R16B	4.00198	0.927961	12.0809	0.00050941	0.00344232
ENSG00000107736	CDH23	4.0019	3.33254	15.1398	9.98351e-05	0.000898437
ENSG00000146373	RNF217	3.99841	5.14407	6.56625	0.0103931	0.0401158
ENSG00000187634	SAMD11	3.99285	4.79148	14.9883	0.000108178	0.000956021
ENSG00000157343	ARMC12	3.99261	-0.582411	16.1128	5.96804e-05	0.000581485
ENSG00000164520	RAET1E	3.99056	2.15883	12.2737	0.000459383	0.00316414
ENSG00000007402	CACNA2D2	3.99051	2.91752	19.5924	9.58477e-06	0.00012622
ENSG00000180914	OXTR	3.99032	5.30542	20.9913	4.61373e-06	6.90351e-05
ENSG00000139117	CPNE8	3.99022	5.023	7.8212	0.00516369	0.0228296
ENSG00000135299	ANKRD6	3.98401	4.05194	29.4711	5.6757e-08	1.73993e-06
ENSG00000153993	SEMA3D	3.97969	6.06311	6.19529	0.0128091	0.0472634
ENSG00000174871	CNIH2	3.97896	2.45756	18.5939	1.61736e-05	0.000191577
ENSG00000134954	ETS1	3.97821	8.4738	27.676	1.43433e-07	3.79981e-06
ENSG00000240764	PCDHGC5	3.97611	0.303356	17.4084	3.01498e-05	0.000325124
ENSG00000132932	ATP8A2	3.97388	2.17384	9.64318	0.00190056	0.0100136
ENSG00000122025	FLT3	3.97156	-0.228974	6.14287	0.0131943	0.0483961
ENSG00000154165	GPR15	3.97069	-1.5475	6.07223	0.0137323	0.0498364
ENSG00000175229	GAL3ST3	3.96986	-2.42105	17.2848	3.21748e-05	0.00034447
ENSG00000064042	LIMCH1	3.96697	7.54379	10.4163	0.00124909	0.00718338
ENSG00000095370	SH2D3C	3.96548	0.865881	16.9761	3.7854e-05	0.00039357
ENSG00000120949	TNFRSF8	3.95908	1.63578	16.6224	4.56081e-05	0.000463122
ENSG00000182389	CACNB4	3.94206	2.09381	13.7501	0.00020881	0.00163297
ENSG00000181541	MAB21L2	3.93962	-1.75705	9.19706	0.00242404	0.0122414
ENSG00000157064	NMNAT2	3.93531	5.52982	14.2537	0.000159749	0.00130948
ENSG00000099954	CECR2	3.93016	2.08493	10.7088	0.00106625	0.00633475
ENSG00000165914	TTC7B	3.92911	5.81547	18.9327	1.35412e-05	0.00016686
ENSG00000099822	HCN2	3.92795	4.18708	15.198	9.68056e-05	0.000875352
ENSG00000184371	CSF1	3.92312	6.76523	41.4144	1.23145e-10	8.90098e-09
ENSG00000197177	ADGRA1	3.92136	-0.637224	6.69689	0.0096581	0.0379349
ENSG00000105270	CLIP3	3.91464	3.81949	30.9428	2.65753e-08	9.22146e-07
ENSG00000105499	PLA2G4C	3.90635	2.63929	33.235	8.16654e-09	3.42148e-07
ENSG00000099957	P2RX6	3.90444	2.14592	19.1089	1.23465e-05	0.000154838
ENSG00000173198	CYSLTR1	3.8993	-2.06742	8.10142	0.00442305	0.0200455
ENSG00000172232	AZU1	3.89895	0.325081	12.3309	0.000445529	0.00308271
ENSG00000159403	C1R	3.89507	5.93412	22.0692	2.63002e-06	4.29924e-05
ENSG00000131435	PDLIM4	3.89484	5.13939	9.57723	0.00197006	0.0103508
ENSG00000183691	NOG	3.89324	2.9511	6.53276	0.0105905	0.0406792
ENSG00000165029	ABCA1	3.89322	7.23249	22.0961	2.59343e-06	4.25789e-05
ENSG00000134343	ANO3	3.8925	0.78336	8.35933	0.00383712	0.0178746
ENSG00000102302	FGD1	3.88904	5.25731	57.6143	3.18906e-14	6.32889e-12
ENSG00000256660	CLEC12B	3.88823	-2.14419	10.4142	0.00125047	0.00718765
ENSG00000167680	SEMA6B	3.88743	5.50038	16.8192	4.11161e-05	0.000422925
ENSG00000095397	WHRN	3.88516	4.19811	14.6804	0.000127365	0.00109397
ENSG00000198597	ZNF536	3.88494	-1.91175	7.79175	0.00524853	0.0230748
ENSG00000105141	CASP14	3.88465	-0.53989	6.77504	0.00924414	0.0366269
ENSG00000168334	XIRP1	3.88404	-2.00784	14.1762	0.000166464	0.00135082
ENSG00000196724	ZNF418	3.88352	0.38384	12.2002	0.000477833	0.0032601
ENSG00000182871	COL18A1	3.88316	7.93649	14.7703	0.000121434	0.00105262
ENSG00000112186	CAP2	3.88258	6.15441	33.8331	6.00471e-09	2.68479e-07
ENSG00000143816	WNT9A	3.8825	4.30037	10.1731	0.00142507	0.00795675
ENSG00000176732	PFN4	3.88241	0.693508	19.1844	1.18682e-05	0.000149836
ENSG00000174740	PABPC5	3.87966	-2.47586	11.6217	0.000651857	0.0042281
ENSG00000176009	ASCL3	3.87966	-2.32819	9.54556	0.00200433	0.0104822
ENSG00000174944	P2RY14	3.87151	-2.22381	8.2985	0.00396779	0.0183423
ENSG00000170382	LRRN2	3.86649	3.87514	7.27419	0.00699526	0.0291779
ENSG00000154114	TBCEL	3.8658	5.57006	9.55949	0.00198918	0.0104126
ENSG00000103647	CORO2B	3.86519	3.33151	6.82688	0.00897958	0.0357037
ENSG00000134363	FST	3.86065	5.32494	10.8641	0.000980446	0.00591194
ENSG00000184451	CCR10	3.85814	1.99794	23.7032	1.12393e-06	2.15856e-05
ENSG00000152463	OLAH	3.8543	-0.84463	11.8342	0.000581526	0.0038582
ENSG00000113580	NR3C1	3.85394	7.45267	14.5792	0.000134388	0.00113759
ENSG00000197415	VEPH1	3.85323	4.49328	20.4371	6.16249e-06	8.75955e-05
ENSG00000002746	HECW1	3.84793	1.64226	12.6631	0.000372936	0.00266161
ENSG00000136014	USP44	3.84594	0.16988	19.0418	1.27889e-05	0.000159502
ENSG00000168309	FAM107A	3.83798	-1.34818	9.27223	0.00232654	0.0118176
ENSG00000103154	NECAB2	3.8364	0.343301	19.939	7.99533e-06	0.000108186
ENSG00000135116	HRK	3.83442	2.93917	9.03243	0.00265232	0.0131766
ENSG00000180336	MEIOC	3.83268	2.65172	31.1224	2.42264e-08	8.56402e-07
ENSG00000130045	NXNL2	3.83261	1.39318	15.7581	7.19794e-05	0.000679659
ENSG00000234409	CCDC188	3.83165	-0.612974	15.4481	8.48017e-05	0.000777372
ENSG00000134917	ADAMTS8	3.83144	-0.303546	14.6462	0.000129693	0.00110807
ENSG00000186472	PCLO	3.82975	5.29476	7.42817	0.00642107	0.0272246
ENSG00000158008	EXTL1	3.82646	-0.20654	18.4167	1.77495e-05	0.000205539
ENSG00000121753	ADGRB2	3.82516	5.26439	17.8209	2.42698e-05	0.00026981
ENSG00000074590	NUAK1	3.82428	6.4951	18.8413	1.42054e-05	0.000172601
ENSG00000244588	RAD21L1	3.82275	-1.73799	8.69184	0.00319637	0.0154123
ENSG00000113749	HRH2	3.8202	-1.06769	6.60181	0.0101875	0.0395747
ENSG00000182175	RGMA	3.81878	1.83778	10.9583	0.000931833	0.0056763
ENSG00000180332	KCTD4	3.81823	-0.521946	7.8323	0.00513209	0.0227218
ENSG00000166450	PRTG	3.81673	4.34092	11.0279	0.000897515	0.0055058
ENSG00000230601	TEX48	3.81487	-1.53266	6.16067	0.0130622	0.0480362
ENSG00000134824	FADS2	3.81328	7.19644	20.1787	7.05356e-06	9.87498e-05
ENSG00000166086	JAM3	3.80385	5.70348	23.0609	1.56954e-06	2.8095e-05
ENSG00000100626	GALNT16	3.80349	3.66444	8.85525	0.00292246	0.0143112
ENSG00000120057	SFRP5	3.79686	1.65369	6.12838	0.0133029	0.0486841
ENSG00000144369	FAM171B	3.79588	6.12779	12.6161	0.000382445	0.0027226
ENSG00000166831	RBPMS2	3.79051	3.61731	6.35943	0.0116759	0.0440407
ENSG00000171596	NMUR1	3.78881	-1.8671	7.92426	0.00487764	0.0217142
ENSG00000154479	CCDC173	3.78843	-0.159654	27.8219	1.33013e-07	3.57397e-06
ENSG00000099864	PALM	3.78755	5.47712	9.01399	0.00267921	0.0132845
ENSG00000156509	FBXO43	3.7861	2.22114	25.6854	4.01865e-07	9.25845e-06
ENSG00000162687	KCNT2	3.78574	-1.42317	11.8296	0.000582955	0.00386314
ENSG00000134668	SPOCD1	3.78302	4.21857	24.7145	6.64812e-07	1.38978e-05
ENSG00000166317	SYNPO2L	3.77805	1.077	10.6535	0.00109862	0.00647576
ENSG00000205221	VIT	3.77432	-0.63453	7.00234	0.00814033	0.0329812
ENSG00000143786	CNIH3	3.77192	2.10529	32.8864	9.7702e-09	3.94716e-07
ENSG00000168481	LGI3	3.76632	0.399777	12.212	0.000474823	0.00324348
ENSG00000152217	SETBP1	3.7623	3.37952	6.34116	0.0117968	0.0443339
ENSG00000268655	AC008687.4	3.76096	-0.546283	9.27252	0.00232618	0.0118176
ENSG00000103723	AP3B2	3.75235	1.98368	6.99453	0.0081759	0.0330897
ENSG00000106772	PRUNE2	3.75084	3.04802	11.586	0.000664501	0.00429224
ENSG00000115295	CLIP4	3.75011	7.00338	19.5245	9.93165e-06	0.000130031
ENSG00000136928	GABBR2	3.74238	3.31665	11.4222	0.000725711	0.00462492
ENSG00000172935	MRGPRF	3.73284	1.2352	22.0869	2.6058e-06	4.26581e-05
ENSG00000162592	CCDC27	3.73248	-2.48129	11.6265	0.000650183	0.00421966
ENSG00000185697	MYBL1	3.73014	6.96744	23.359	1.34417e-06	2.48858e-05
ENSG00000060982	BCAT1	3.72481	8.43894	7.30176	0.00688872	0.0288185
ENSG00000069493	CLEC2D	3.72148	2.50423	29.8134	4.75695e-08	1.51154e-06
ENSG00000125965	GDF5	3.72075	-0.852285	12.1532	0.00049003	0.00333126
ENSG00000156804	FBXO32	3.7188	7.44753	24.8766	6.1119e-07	1.295e-05
ENSG00000177409	SAMD9L	3.71682	5.7759	9.91328	0.0016409	0.00889831
ENSG00000125414	MYH2	3.71161	-1.86457	9.25097	0.00235371	0.0119337
ENSG00000119681	LTBP2	3.70937	5.64066	28.696	8.46795e-08	2.45614e-06
ENSG00000197937	ZNF347	3.7072	4.52328	7.09433	0.00773283	0.0317274
ENSG00000141469	SLC14A1	3.70553	2.28647	9.38562	0.00218694	0.0112397
ENSG00000212747	RTL8B	3.70274	3.98139	6.67497	0.00977764	0.0383113
ENSG00000175414	ARL10	3.6977	4.86045	12.3393	0.000443523	0.00307422
ENSG00000119698	PPP4R4	3.69541	2.53684	12.539	0.000398551	0.00280898
ENSG00000204583	LRCOL1	3.69235	-1.85963	7.15734	0.00746577	0.0307742
ENSG00000213088	ACKR1	3.69064	-2.50655	11.507	0.000693362	0.00444129
ENSG00000135298	ADGRB3	3.68798	-0.48642	6.91589	0.00854331	0.0343189
ENSG00000183644	C11orf88	3.68758	-1.67856	6.59771	0.010211	0.0396115
ENSG00000092607	TBX15	3.6871	2.26486	16.7916	4.17168e-05	0.000428611
ENSG00000123977	DAW1	3.68693	1.70109	7.7597	0.00534249	0.023415
ENSG00000206073	SERPINB4	3.68469	2.46221	6.16255	0.0130483	0.0480008
ENSG00000165566	AMER2	3.68178	-2.30729	7.6347	0.00572558	0.0248057
ENSG00000112531	QKI	3.68141	7.74415	10.7122	0.0010643	0.00632651
ENSG00000134548	SPX	3.68122	0.481159	7.00276	0.00813839	0.0329812
ENSG00000135519	KCNH3	3.67905	3.47281	12.7132	0.000363084	0.0026028
ENSG00000126259	KIRREL2	3.67712	1.17446	8.40884	0.003734	0.0174975
ENSG00000115155	OTOF	3.67312	0.49924	7.79552	0.00523759	0.0230356
ENSG00000109832	DDX25	3.67306	-1.29464	9.79139	0.0017533	0.00939081
ENSG00000125735	TNFSF14	3.67295	-1.2513	8.8472	0.00293539	0.0143621
ENSG00000133026	MYH10	3.67256	7.70761	15.0157	0.00010662	0.000948182
ENSG00000127955	GNAI1	3.6685	6.2271	10.9452	0.00093845	0.00570739
ENSG00000182759	MAFA	3.66796	1.20106	14.652	0.000129294	0.00110633
ENSG00000159217	IGF2BP1	3.66137	6.57284	6.15489	0.0131049	0.0481463
ENSG00000123454	DBH	3.65279	-0.897873	10.2932	0.00133521	0.0075709
ENSG00000108387	SEPTIN4	3.65092	2.07708	19.9063	8.13327e-06	0.000109138
ENSG00000180043	FAM71E2	3.64938	-2.36735	11.4006	0.000734212	0.00466426
ENSG00000164512	ANKRD55	3.63986	-1.97629	14.1105	0.000172379	0.00139083
ENSG00000088756	ARHGAP28	3.6376	3.4686	7.36941	0.00663427	0.0279608
ENSG00000242419	PCDHGC4	3.63691	0.670197	10.0942	0.00148741	0.00820758
ENSG00000204511	MCCD1	3.63557	-2.29482	9.44128	0.00212155	0.0109652
ENSG00000189410	SH2D5	3.63424	3.92928	18.7042	1.52647e-05	0.000182654
ENSG00000183160	TMEM119	3.63135	-1.53266	12.7827	0.000349841	0.00252708
ENSG00000131127	ZNF141	3.629	4.72602	11.6078	0.000656771	0.00425266
ENSG00000168675	LDLRAD4	3.62659	2.42382	9.72553	0.00181726	0.00966469
ENSG00000249715	FER1L5	3.62563	-0.602076	14.4331	0.000145228	0.0012153
ENSG00000110318	CEP126	3.62531	4.99672	17.2331	3.30627e-05	0.00035184
ENSG00000177464	GPR4	3.62479	-0.0939104	7.20643	0.00726429	0.0301333
ENSG00000118526	TCF21	3.61792	3.08781	6.85121	0.00885815	0.0353326
ENSG00000175294	CATSPER1	3.61463	2.14473	11.6018	0.000658863	0.00426377
ENSG00000196218	RYR1	3.61265	3.55638	7.20047	0.00728845	0.0302225
ENSG00000157856	DRC1	3.61112	0.87298	12.8207	0.000342799	0.00248638
ENSG00000163958	ZDHHC19	3.61053	-2.0348	9.36537	0.00221123	0.0113388
ENSG00000158748	HTR6	3.60935	-0.506611	8.33752	0.00388347	0.0180433
ENSG00000005249	PRKAR2B	3.59977	4.77333	9.94563	0.00161231	0.00877695
ENSG00000243414	TICAM2	3.59763	2.92263	10.2541	0.00136379	0.00768668
ENSG00000105711	SCN1B	3.59671	3.89048	10.6371	0.00110842	0.00652026
ENSG00000182809	CRIP2	3.59558	7.44457	13.2102	0.000278435	0.00208725
ENSG00000177679	SRRM3	3.59296	3.28139	9.47674	0.00208094	0.0108075
ENSG00000184560	SPEM2	3.58756	-2.32744	8.33258	0.00389403	0.0180604
ENSG00000137463	MGARP	3.58676	1.67975	12.2869	0.000456142	0.00314627
ENSG00000157570	TSPAN18	3.58299	4.25237	9.65078	0.00189271	0.00999084
ENSG00000119917	IFIT3	3.57955	6.85868	20.3159	6.56511e-06	9.25992e-05
ENSG00000128594	LRRC4	3.57904	0.482507	9.9751	0.00158671	0.00866034
ENSG00000108797	CNTNAP1	3.57847	5.37851	34.0038	5.50034e-09	2.47888e-07
ENSG00000135218	CD36	3.57431	3.4848	7.19561	0.00730821	0.0302822
ENSG00000183722	LHFPL6	3.5731	4.27654	7.70363	0.00551098	0.0240047
ENSG00000154319	FAM167A	3.56488	4.75779	11.9187	0.00055572	0.00371093
ENSG00000116039	ATP6V1B1	3.56107	5.01802	6.46463	0.0110042	0.0420115
ENSG00000139174	PRICKLE1	3.56106	5.22852	10.1955	0.0014078	0.00788369
ENSG00000167077	MEI1	3.55773	0.275879	20.7314	5.28437e-06	7.76322e-05
ENSG00000198003	CCDC151	3.55464	0.797587	21.8866	2.89246e-06	4.64766e-05
ENSG00000109099	PMP22	3.55396	6.68507	12.2285	0.000470662	0.00322674
ENSG00000160219	GAB3	3.55117	1.88641	9.023	0.00266604	0.0132331
ENSG00000053524	MCF2L2	3.54777	2.37405	35.1024	3.12809e-09	1.51218e-07
ENSG00000143603	KCNN3	3.5454	-0.134349	16.1018	6.00255e-05	0.000584344
ENSG00000179431	FJX1	3.54514	5.56803	11.8775	0.00056815	0.00378499
ENSG00000198121	LPAR1	3.54469	4.95179	7.24437	0.00711236	0.0295793
ENSG00000142583	SLC2A5	3.54228	0.655319	12.353	0.000440289	0.00305368
ENSG00000044459	CNTLN	3.5403	5.27302	10.2992	0.00133085	0.00754994
ENSG00000080644	CHRNA3	3.53278	1.69535	18.5256	1.67634e-05	0.000197104
ENSG00000184500	PROS1	3.52976	6.80877	9.93285	0.00162355	0.00881689
ENSG00000077522	ACTN2	3.52671	-1.58183	10.9052	0.000958965	0.00580407
ENSG00000155962	CLIC2	3.52437	2.97261	13.4304	0.000247586	0.00188472
ENSG00000166407	LMO1	3.52193	-1.69292	12.3962	0.0004302	0.00299656
ENSG00000188730	VWC2	3.51983	-2.53271	8.13061	0.00435241	0.0197967
ENSG00000186838	SELENOV	3.51802	-2.36816	8.26896	0.00403286	0.0185975
ENSG00000104888	SLC17A7	3.51554	1.76865	13.1674	0.000284866	0.002127
ENSG00000121653	MAPK8IP1	3.51114	4.78707	23.6429	1.15971e-06	2.21225e-05
ENSG00000197561	ELANE	3.50996	-2.4071	15.6009	7.82167e-05	0.000727621
ENSG00000095970	TREM2	3.50849	-2.23229	6.73914	0.00943203	0.0372149
ENSG00000221866	PLXNA4	3.50692	0.874629	8.71194	0.00316132	0.0152824
ENSG00000108852	MPP2	3.50676	5.02295	14.2316	0.000161631	0.00131917
ENSG00000166313	APBB1	3.50152	4.86248	10.9316	0.000945397	0.00573423
ENSG00000141506	PIK3R5	3.50142	-1.2999	12.8876	0.000330769	0.00241632
ENSG00000131015	ULBP2	3.50056	5.16168	16.1477	5.85885e-05	0.000573316
ENSG00000148926	ADM	3.49831	7.31014	13.8263	0.000200509	0.0015817
ENSG00000169213	RAB3B	3.49248	7.01141	9.64667	0.00189695	0.0100039
ENSG00000132965	ALOX5AP	3.49199	0.906236	9.37049	0.00220507	0.0113175
ENSG00000168676	KCTD19	3.48475	0.0827352	17.0472	3.64617e-05	0.000381903
ENSG00000174448	STARD6	3.48412	-1.92545	12.4649	0.000414669	0.00290089
ENSG00000137707	BTG4	3.48347	-1.81905	10.8438	0.000991283	0.00595823
ENSG00000118495	PLAGL1	3.48192	4.9973	6.08738	0.0136151	0.0495062
ENSG00000130477	UNC13A	3.47901	2.26603	14.9904	0.00010806	0.000955724
ENSG00000179954	SSC5D	3.47521	0.881919	22.5026	2.09864e-06	3.54326e-05
ENSG00000152315	KCNK13	3.4752	-0.689552	7.86479	0.00504066	0.0223432
ENSG00000239713	APOBEC3G	3.47061	5.13863	7.6299	0.00574085	0.0248243
ENSG00000259224	SLC35G6	3.4579	-1.33794	13.7855	0.000204912	0.00161361
ENSG00000204065	TCEAL5	3.45726	-2.52387	10.102	0.00148106	0.00818855
ENSG00000188015	S100A3	3.45666	2.1972	24.2785	8.33658e-07	1.68147e-05
ENSG00000197576	HOXA4	3.45387	2.90895	12.8858	0.00033109	0.00241632
ENSG00000166741	NNMT	3.44974	7.06394	6.76728	0.0092844	0.0367735
ENSG00000165966	PDZRN4	3.44672	-2.54244	7.73796	0.00540718	0.0236436
ENSG00000142156	COL6A1	3.43429	9.0333	12.5075	0.000405323	0.00284829
ENSG00000158163	DZIP1L	3.43337	3.61032	15.3793	8.79454e-05	0.000802289
ENSG00000149926	TLCD3B	3.43204	1.09914	18.8121	1.44249e-05	0.00017396
ENSG00000171450	CDK5R2	3.43094	2.22617	10.4879	0.00120158	0.00695971
ENSG00000151572	ANO4	3.42934	1.00406	7.53161	0.00606258	0.0260265
ENSG00000185818	NAT8L	3.42653	4.64077	8.93679	0.00279484	0.0137398
ENSG00000171462	DLK2	3.42198	3.79237	23.2378	1.43152e-06	2.6288e-05
ENSG00000124196	GTSF1L	3.41901	-2.548	9.54168	0.00200858	0.0104947
ENSG00000174004	NRROS	3.41846	1.53938	7.99678	0.00468606	0.0210269
ENSG00000143479	DYRK3	3.41608	4.60574	22.546	2.05172e-06	3.47962e-05
ENSG00000173482	PTPRM	3.41488	6.12765	20.8667	4.9238e-06	7.31905e-05
ENSG00000175984	DENND2C	3.41487	3.41298	16.594	4.62962e-05	0.000469267
ENSG00000169992	NLGN2	3.41474	6.42541	18.6223	1.59348e-05	0.000189542
ENSG00000076706	MCAM	3.41193	6.59518	9.56148	0.00198703	0.0104079
ENSG00000121236	TRIM6	3.4066	4.74606	8.65133	0.00326824	0.0157253
ENSG00000187260	WDR86	3.40358	1.8199	23.1013	1.5369e-06	2.78432e-05
ENSG00000101230	ISM1	3.40306	0.46451	10.645	0.00110371	0.00649595
ENSG00000124126	PREX1	3.40137	5.40888	13.646	0.000220717	0.00171245
ENSG00000134765	DSC1	3.40041	0.177893	6.32141	0.0119289	0.0447264
ENSG00000128606	LRRC17	3.40016	1.511	14.1282	0.00017076	0.00138021
ENSG00000196074	SYCP2	3.39872	4.42209	14.3937	0.000148301	0.0012308
ENSG00000120658	ENOX1	3.39789	2.49399	7.05607	0.00789972	0.0322024
ENSG00000154721	JAM2	3.3942	0.467146	16.6439	4.50952e-05	0.000459023
ENSG00000146555	SDK1	3.39359	4.17476	7.80254	0.0052173	0.0229891
ENSG00000130287	NCAN	3.39251	-1.08927	14.5526	0.000136303	0.00114979
ENSG00000152822	GRM1	3.38646	-1.50903	11.067	0.000878778	0.00542616
ENSG00000140090	SLC24A4	3.38519	-0.61746	6.64021	0.0099702	0.0388772
ENSG00000181804	SLC9A9	3.38452	1.33107	13.7574	0.000207995	0.00162826
ENSG00000162383	SLC1A7	3.37214	1.3512	6.99207	0.00818715	0.0331234
ENSG00000117322	CR2	3.36628	-0.196568	6.35768	0.0116874	0.0440567
ENSG00000109743	BST1	3.36523	2.23372	16.0678	6.11138e-05	0.000593917
ENSG00000184261	KCNK12	3.36278	1.46361	9.41815	0.00214848	0.0110823
ENSG00000096996	IL12RB1	3.35787	-0.942543	11.2459	0.000797996	0.00499553
ENSG00000111664	GNB3	3.35278	2.66747	15.8783	6.7548e-05	0.000645162
ENSG00000183496	MEX3B	3.34999	3.74456	24.2246	8.57304e-07	1.72253e-05
ENSG00000106123	EPHB6	3.34943	5.75714	6.4178	0.0112982	0.0429164
ENSG00000099284	MACROH2A2	3.34428	4.97794	6.78176	0.0092094	0.0365148
ENSG00000197208	SLC22A4	3.34375	2.24907	23.8964	1.01659e-06	1.99647e-05
ENSG00000142871	CCN1	3.3434	10.4471	11.2639	0.000790269	0.00496364
ENSG00000088320	REM1	3.3381	-2.35881	7.28131	0.00696756	0.0290838
ENSG00000149485	FADS1	3.33452	8.02402	10.7648	0.00103447	0.00618168
ENSG00000212122	TSSK1B	3.32057	-2.49177	6.26662	0.0123034	0.0458117
ENSG00000101298	SNPH	3.32034	3.62923	15.8773	6.75846e-05	0.000645162
ENSG00000101203	COL20A1	3.32014	0.911679	11.7296	0.000615132	0.0040315
ENSG00000204815	TTC25	3.31712	1.53585	18.0108	2.1966e-05	0.000248231
ENSG00000143322	ABL2	3.31667	8.42566	43.1687	5.02165e-11	4.08668e-09
ENSG00000178125	PPP1R42	3.31237	-2.42742	7.74043	0.0053998	0.0236296
ENSG00000033122	LRRC7	3.30199	2.87499	10.8717	0.000976446	0.00589411
ENSG00000197603	CPLANE1	3.30159	6.81779	12.6211	0.000381414	0.00271697
ENSG00000179058	C9orf50	3.30116	-1.6554	6.95911	0.00833934	0.0336175
ENSG00000107611	CUBN	3.29823	2.19764	12.3112	0.000450244	0.00311128
ENSG00000157927	RADIL	3.29753	2.44005	9.59922	0.0019466	0.0102371
ENSG00000141040	ZNF287	3.29425	3.43708	7.04214	0.0079614	0.0324188
ENSG00000134365	CFHR4	3.29355	-2.1236	9.01351	0.00267991	0.0132845
ENSG00000197816	CCDC180	3.29237	2.34118	10.3835	0.00127148	0.00729862
ENSG00000142552	RCN3	3.29164	6.54727	11.053	0.000885434	0.00544646
ENSG00000272514	CFAP206	3.28082	0.813381	9.49175	0.00206398	0.0107445
ENSG00000165124	SVEP1	3.27498	3.38687	8.11514	0.0043897	0.0199103
ENSG00000213626	LBH	3.27484	6.61914	6.15269	0.0131213	0.0481751
ENSG00000050165	DKK3	3.27447	8.04621	6.27404	0.0122519	0.0456502
ENSG00000137225	CAPN11	3.27156	-1.37543	8.99107	0.00271301	0.0134133
ENSG00000154040	CABYR	3.26557	3.56075	12.7109	0.000363533	0.00260436
ENSG00000113763	UNC5A	3.25999	4.06898	6.86896	0.00877055	0.0350822
ENSG00000244414	CFHR1	3.25967	-2.56855	7.44237	0.00637059	0.0270511
ENSG00000185745	IFIT1	3.25902	6.61097	9.68125	0.00186158	0.00984947
ENSG00000026652	AGPAT4	3.25632	4.61898	17.0553	3.63075e-05	0.00038091
ENSG00000183873	SCN5A	3.25597	2.45965	12.7617	0.000353799	0.00254591
ENSG00000012124	CD22	3.25479	3.21883	7.01721	0.00807301	0.0327906
ENSG00000122367	LDB3	3.24988	0.881095	16.431	5.04543e-05	0.000502854
ENSG00000113657	DPYSL3	3.24896	7.64661	6.3196	0.011941	0.0447423
ENSG00000176381	PRR18	3.24739	-0.140269	6.64264	0.00995663	0.0388511
ENSG00000134339	SAA2	3.24545	3.53599	6.84081	0.00890982	0.0354887
ENSG00000114487	MORC1	3.24325	-2.41794	6.12917	0.0132969	0.0486841
ENSG00000169302	STK32A	3.24248	0.747735	9.84427	0.00170361	0.00917244
ENSG00000112319	EYA4	3.24169	1.49841	6.62603	0.0100499	0.0391611
ENSG00000168779	SHOX2	3.23766	3.86309	8.17004	0.00425879	0.019457
ENSG00000023445	BIRC3	3.23396	8.34775	13.0856	0.000297578	0.0022035
ENSG00000127743	IL17B	3.2326	-2.36421	6.06422	0.0137948	0.0499828
ENSG00000109846	CRYAB	3.22819	1.06166	14.0137	0.000181481	0.0014498
ENSG00000137094	DNAJB5	3.22647	4.51335	33.2749	8.00067e-09	3.377e-07
ENSG00000049089	COL9A2	3.22258	3.81075	11.1773	0.00082803	0.00515786
ENSG00000213190	MLLT11	3.22081	4.93531	24.1961	8.70101e-07	1.73897e-05
ENSG00000154240	CEP112	3.22032	4.42782	11.8146	0.000587692	0.00388543
ENSG00000178175	ZNF366	3.21944	-2.4603	11.6184	0.00065304	0.00423334
ENSG00000147689	FAM83A	3.21511	4.83035	6.87363	0.00874768	0.0350203
ENSG00000127377	CRYGN	3.21242	-1.56297	8.39382	0.00376498	0.0176161
ENSG00000168878	SFTPB	3.20902	-1.98004	7.43104	0.00641082	0.0271913
ENSG00000138769	CDKL2	3.20247	1.82918	10.6256	0.0011153	0.0065505
ENSG00000189013	KIR2DL4	3.19993	-2.57719	7.71243	0.00548419	0.0239064
ENSG00000176256	HMGB4	3.19993	-2.57719	7.71243	0.00548419	0.0239064
ENSG00000155833	CYLC2	3.19993	-2.57719	7.71243	0.00548419	0.0239064
ENSG00000134207	SYT6	3.19705	-2.42911	8.64109	0.00328666	0.0157938
ENSG00000214063	TSPAN4	3.19618	6.887	27.9859	1.22202e-07	3.33096e-06
ENSG00000123342	MMP19	3.19418	3.82974	10.8067	0.00101133	0.00606907
ENSG00000169902	TPST1	3.19371	5.68309	10.0486	0.00152463	0.00837622
ENSG00000111087	GLI1	3.18825	3.38802	7.76303	0.00533265	0.0233847
ENSG00000169169	CPT1C	3.18739	4.55238	9.08548	0.00257646	0.0129017
ENSG00000087303	NID2	3.18731	4.10239	12.0039	0.000530899	0.00356835
ENSG00000048540	LMO3	3.18285	0.912678	6.87338	0.00874889	0.0350203
ENSG00000198892	SHISA4	3.17964	4.16843	11.5089	0.000692651	0.00443925
ENSG00000125355	TMEM255A	3.17648	0.263953	10.9356	0.000943329	0.00572475
ENSG00000184060	ADAP2	3.17394	2.74748	13.1644	0.000285321	0.00212899
ENSG00000106976	DNM1	3.17346	5.44825	19.8819	8.23785e-06	0.00011028
ENSG00000162641	AKNAD1	3.16289	-0.327838	6.84726	0.00887775	0.0353984
ENSG00000121743	GJA3	3.15924	3.24597	9.14405	0.00249528	0.0125396
ENSG00000145687	SSBP2	3.15515	4.30588	14.2464	0.00016037	0.00131172
ENSG00000069667	RORA	3.15502	4.70808	13.8535	0.000197624	0.0015633
ENSG00000090530	P3H2	3.15306	7.07218	11.807	0.0005901	0.00389676
ENSG00000176971	FIBIN	3.15283	-1.1668	6.51471	0.0106986	0.0410384
ENSG00000111879	FAM184A	3.14778	3.06107	7.91556	0.00490115	0.0218017
ENSG00000213658	LAT	3.14577	4.34981	16.0487	6.17329e-05	0.000597879
ENSG00000244731	C4A	3.1378	2.75317	11.8038	0.00059109	0.00389825
ENSG00000136490	LIMD2	3.13647	4.5081	13.1434	0.000288528	0.00215009
ENSG00000181072	CHRM2	3.13076	-2.36133	9.13705	0.00250484	0.012582
ENSG00000101331	CCM2L	3.12572	0.293181	6.27815	0.0122236	0.0455595
ENSG00000065413	ANKRD44	3.12509	1.96072	10.8004	0.00101478	0.00608651
ENSG00000224389	C4B	3.12503	2.61788	6.64784	0.00992758	0.0387632
ENSG00000161682	FAM171A2	3.12372	4.19132	8.42194	0.00370721	0.0173926
ENSG00000167779	IGFBP6	3.12305	6.33511	13.052	0.000302963	0.00223556
ENSG00000064205	CCN5	3.11603	0.154617	18.1111	2.08382e-05	0.000237145
ENSG00000213694	S1PR3	3.10366	4.11126	6.53278	0.0105904	0.0406792
ENSG00000110848	CD69	3.0996	-1.35188	8.51108	0.0035299	0.0167426
ENSG00000070371	CLTCL1	3.09873	5.02222	17.6062	2.71707e-05	0.000298114
ENSG00000086619	ERO1B	3.09752	4.85563	12.7719	0.000351869	0.00253687
ENSG00000130427	EPO	3.09625	-1.1645	9.2911	0.0023027	0.0117287
ENSG00000128253	RFPL2	3.09527	-1.36005	8.48144	0.00358787	0.0169745
ENSG00000172209	GPR22	3.09287	0.12508	6.14909	0.013148	0.0482577
ENSG00000143382	ADAMTSL4	3.09047	7.10745	10.0387	0.00153285	0.00841322
ENSG00000110079	MS4A4A	3.08898	-2.46591	7.64494	0.00569319	0.0246938
ENSG00000124813	RUNX2	3.08863	6.3055	11.5417	0.000680513	0.00437136
ENSG00000241697	TMEFF1	3.08611	4.1848	15.3064	9.14049e-05	0.0008305
ENSG00000187098	MITF	3.08231	4.8098	20.5665	5.75959e-06	8.32087e-05
ENSG00000168811	IL12A	3.08228	1.57969	11.0562	0.0008839	0.00543998
ENSG00000139625	MAP3K12	3.08076	4.57506	40.616	1.85279e-10	1.27023e-08
ENSG00000149633	KIAA1755	3.07853	-0.0515418	13.6607	0.000218995	0.00170259
ENSG00000142279	WTIP	3.07349	5.30066	14.0219	0.000180695	0.00144454
ENSG00000166130	IKBIP	3.0689	6.73577	39.2723	3.68638e-10	2.31668e-08
ENSG00000180773	SLC36A4	3.06639	5.4203	6.95912	0.00833932	0.0336175
ENSG00000165028	NIPSNAP3B	3.06312	0.374562	11.5265	0.000686117	0.00440236
ENSG00000127325	BEST3	3.06269	-0.14124	6.41048	0.0113449	0.0430792
ENSG00000178562	CD28	3.05447	-2.59342	7.27273	0.00700095	0.0291908
ENSG00000128340	RAC2	3.05265	6.44358	12.3863	0.0004325	0.00300888
ENSG00000138172	CALHM2	3.04747	4.6052	17.8463	2.39479e-05	0.000267686
ENSG00000058091	CDK14	3.04439	5.72766	8.36705	0.00382086	0.0178233
ENSG00000005961	ITGA2B	3.04079	1.38811	11.5836	0.000665362	0.00429354
ENSG00000103742	IGDCC4	3.03811	4.47456	8.61779	0.00332896	0.0159564
ENSG00000102781	KATNAL1	3.03015	5.67474	12.2044	0.000476771	0.00325482
ENSG00000111796	KLRB1	3.02847	-2.15009	7.6264	0.005752	0.0248631
ENSG00000165424	ZCCHC24	3.02808	5.44327	15.7138	7.36833e-05	0.000691335
ENSG00000075213	SEMA3A	3.02501	6.53145	13.8143	0.000201789	0.00159069
ENSG00000176244	ACBD7	3.01998	3.02412	14.4225	0.000146045	0.00121924
ENSG00000140511	HAPLN3	3.0174	5.32081	11.5726	0.000669313	0.0043092
ENSG00000063015	SEZ6	3.01628	-1.07161	10.7256	0.00105666	0.0062877
ENSG00000164691	TAGAP	3.0149	-0.699103	9.11757	0.00253166	0.0126998
ENSG00000185420	SMYD3	3.01478	7.13438	22.6805	1.91296e-06	3.2868e-05
ENSG00000165410	CFL2	3.00529	7.30316	25.2485	5.03986e-07	1.10679e-05
ENSG00000183760	ACP7	3.00521	2.6202	6.68066	0.00974644	0.0382155
ENSG00000141668	CBLN2	3.00463	-2.48447	9.86721	0.00168251	0.00908039
ENSG00000198682	PAPSS2	3.00355	7.29784	10.2187	0.00139025	0.00780339
ENSG00000169184	MN1	2.99839	4.73475	7.02788	0.00802501	0.0326122
ENSG00000023608	SNAPC1	2.99803	6.92959	29.7056	5.02883e-08	1.58457e-06
ENSG00000006283	CACNA1G	2.99688	1.87333	8.16409	0.0042728	0.0194931
ENSG00000110427	KIAA1549L	2.98378	6.00887	7.45582	0.00632317	0.0268901
ENSG00000138435	CHRNA1	2.98217	-2.13147	6.29864	0.012083	0.0451547
ENSG00000118307	CASC1	2.98123	1.35667	14.1925	0.000165031	0.00134208
ENSG00000174600	CMKLR1	2.98117	-1.86311	8.70248	0.00317777	0.0153423
ENSG00000008516	MMP25	2.97967	2.36197	12.9937	0.000312537	0.00229871
ENSG00000223547	ZNF844	2.9782	4.96536	6.93036	0.00847446	0.0340665
ENSG00000139112	GABARAPL1	2.97697	7.10575	8.60163	0.00335863	0.016085
ENSG00000175906	ARL4D	2.97361	4.89878	7.99762	0.00468389	0.0210255
ENSG00000165757	JCAD	2.96668	6.60637	8.23885	0.00410031	0.0188701
ENSG00000105376	ICAM5	2.9662	3.90191	9.96252	0.00159759	0.00870518
ENSG00000178404	CEP295NL	2.96544	0.0187645	12.3022	0.000452418	0.00312439
ENSG00000100427	MLC1	2.95281	-0.707193	8.54673	0.00346143	0.0164728
ENSG00000152784	PRDM8	2.95195	2.61752	6.6179	0.0100959	0.0392862
ENSG00000143847	PPFIA4	2.94389	3.00456	10.731	0.00105355	0.00627579
ENSG00000159261	CLDN14	2.94322	-1.26516	11.4067	0.000731782	0.00465739
ENSG00000170464	DNAJC18	2.94149	4.80998	20.4668	6.06753e-06	8.66855e-05
ENSG00000166025	AMOTL1	2.93325	7.89479	12.1348	0.000494898	0.00336131
ENSG00000057252	SOAT1	2.92887	7.52361	11.772	0.000601295	0.00395367
ENSG00000134986	NREP	2.92515	5.85363	8.32866	0.00390244	0.018092
ENSG00000198673	TAFA2	2.92	1.25717	16.5059	4.8498e-05	0.000486787
ENSG00000155511	GRIA1	2.91277	-2.26209	6.48133	0.0109013	0.0416748
ENSG00000186453	FAM228A	2.91022	-2.11739	7.73169	0.005426	0.0237167
ENSG00000148082	SHC3	2.90505	3.28185	6.88526	0.00869096	0.0348254
ENSG00000173210	ABLIM3	2.90449	6.92778	9.78924	0.00175536	0.00939735
ENSG00000072818	ACAP1	2.8976	2.11771	29.3386	6.0772e-08	1.85297e-06
ENSG00000126861	OMG	2.89531	0.189291	8.14382	0.00432083	0.0196689
ENSG00000010610	CD4	2.8943	-0.269694	8.20714	0.00417258	0.0191094
ENSG00000148408	CACNA1B	2.88927	-0.116841	7.40543	0.00650273	0.0275089
ENSG00000197594	ENPP1	2.88684	5.98158	9.57617	0.00197119	0.0103519
ENSG00000167281	RBFOX3	2.88668	1.46939	11.2573	0.000793122	0.00497604
ENSG00000126778	SIX1	2.88661	4.28516	8.66125	0.00325049	0.0156466
ENSG00000164294	GPX8	2.88421	6.74962	10.6949	0.00107432	0.00636935
ENSG00000183542	KLRC4	2.88136	-2.61286	6.95915	0.00833914	0.0336175
ENSG00000083290	ULK2	2.87576	5.64629	7.45585	0.00632306	0.0268901
ENSG00000169379	ARL13B	2.86542	6.06999	20.0333	7.61057e-06	0.000104861
ENSG00000181215	C4orf50	2.85894	-2.587	6.90806	0.00858081	0.034445
ENSG00000072195	SPEG	2.85847	5.49173	11.2731	0.000786366	0.00494737
ENSG00000135047	CTSL	2.85723	8.06399	6.51818	0.0106777	0.0409723
ENSG00000136040	PLXNC1	2.85721	2.88314	19.3836	1.06922e-05	0.000137914
ENSG00000011332	DPF1	2.85657	3.68626	13.5933	0.000226997	0.00175396
ENSG00000187902	SHISA7	2.85386	-1.18915	8.99949	0.00270054	0.0133633
ENSG00000131398	KCNC3	2.85345	3.91232	8.24458	0.00408738	0.0188183
ENSG00000133561	GIMAP6	2.84562	-2.43654	6.48741	0.0108641	0.0415986
ENSG00000183682	BMP8A	2.84493	-1.04571	7.03629	0.00798745	0.0325131
ENSG00000168116	KIAA1586	2.84015	5.7035	12.6067	0.000384363	0.00273282
ENSG00000163645	ERICH6	2.83808	-1.7832	12.5275	0.000401012	0.00282456
ENSG00000114480	GBE1	2.83694	7.08014	13.6531	0.000219873	0.00170824
ENSG00000161791	FMNL3	2.83647	6.3544	18.8583	1.40797e-05	0.000171812
ENSG00000269404	SPIB	2.83591	-0.748195	10.0275	0.00154217	0.00845205
ENSG00000166257	SCN3B	2.83198	1.22969	7.45502	0.00632599	0.026892
ENSG00000087085	ACHE	2.82987	3.22869	8.83487	0.00295529	0.0144345
ENSG00000179071	CCDC89	2.8277	0.768116	7.72088	0.00545859	0.0238408
ENSG00000057019	DCBLD2	2.82469	9.52914	10.4814	0.00120583	0.00697717
ENSG00000253159	PCDHGA12	2.80876	0.47282	12.1667	0.000486495	0.00331121
ENSG00000164188	RANBP3L	2.80826	-1.04543	7.47203	0.00626649	0.0267093
ENSG00000126091	ST3GAL3	2.80693	4.52421	26.8106	2.24402e-07	5.66351e-06
ENSG00000205189	ZBTB10	2.80262	6.88596	6.74817	0.00938441	0.0370646
ENSG00000148344	PTGES	2.79867	7.52495	7.68371	0.00557214	0.0242244
ENSG00000167549	CORO6	2.79684	3.34754	10.6264	0.00111484	0.0065505
ENSG00000114646	CSPG5	2.79433	2.33164	13.6868	0.000215971	0.00168255
ENSG00000134369	NAV1	2.79103	6.82101	12.5101	0.000404749	0.00284734
ENSG00000141665	FBXO15	2.7862	1.32277	10.1544	0.0014396	0.00800667
ENSG00000180720	CHRM4	2.78436	1.24794	11.3238	0.000765188	0.00483564
ENSG00000113594	LIFR	2.77754	7.71929	9.72662	0.00181618	0.00966352
ENSG00000136918	WDR38	2.76591	-1.40112	11.5458	0.000679021	0.00436425
ENSG00000158023	WDR66	2.76495	4.40755	12.705	0.000364684	0.0026093
ENSG00000133640	LRRIQ1	2.76277	0.845529	8.649	0.00327241	0.0157387
ENSG00000165338	HECTD2	2.75699	4.55788	11.1906	0.000822148	0.00512404
ENSG00000205413	SAMD9	2.75484	7.44818	14.2482	0.000160212	0.00131143
ENSG00000159753	CARMIL2	2.75102	2.9043	10.3347	0.00130555	0.00744375
ENSG00000173320	STOX2	2.74756	3.17458	6.65081	0.00991106	0.0387267
ENSG00000165972	CCDC38	2.73804	-0.674445	12.4351	0.000421343	0.00294212
ENSG00000177098	SCN4B	2.73622	1.3459	8.70013	0.00318188	0.0153555
ENSG00000115355	CCDC88A	2.73563	7.19281	16.9719	3.7937e-05	0.000394071
ENSG00000035862	TIMP2	2.72852	9.41997	11.7835	0.000597579	0.0039347
ENSG00000122591	FAM126A	2.72216	7.4074	13.9925	0.000183542	0.0014642
ENSG00000106952	TNFSF8	2.7221	-1.79858	6.30254	0.0120565	0.0450915
ENSG00000153814	JAZF1	2.72144	4.71197	11.1107	0.000858297	0.00532003
ENSG00000130528	HRC	2.71615	-0.0721581	7.54023	0.00603363	0.0259121
ENSG00000084710	EFR3B	2.71317	2.19174	9.81073	0.00173496	0.00931462
ENSG00000165046	LETM2	2.71175	4.06368	19.0728	1.25827e-05	0.000157277
ENSG00000149639	SOGA1	2.70947	7.48777	14.8698	0.000115191	0.00100621
ENSG00000108370	RGS9	2.70804	1.4843	10.3353	0.00130511	0.00744375
ENSG00000133069	TMCC2	2.70685	3.08894	9.42415	0.00214146	0.0110613
ENSG00000170667	RASA4B	2.69457	0.643743	13.5386	0.000233708	0.00179844
ENSG00000197837	H4-16	2.69208	4.22952	8.33653	0.00388557	0.0180433
ENSG00000173267	SNCG	2.69144	5.58531	7.44469	0.0063624	0.0270265
ENSG00000183775	KCTD16	2.69079	-0.330427	6.99515	0.00817307	0.0330897
ENSG00000099250	NRP1	2.69007	7.82104	13.0681	0.00030036	0.00221925
ENSG00000184524	CEND1	2.68127	0.15106	10.1634	0.00143258	0.00797901
ENSG00000118263	KLF7	2.67957	6.15248	9.60387	0.00194168	0.0102159
ENSG00000089692	LAG3	2.67826	1.62989	11.0161	0.000903244	0.00553494
ENSG00000186642	PDE2A	2.67771	2.53868	7.06841	0.00784549	0.0320622
ENSG00000126882	FAM78A	2.67735	3.68575	8.23015	0.00412001	0.0189344
ENSG00000214140	PRCD	2.6753	0.0915982	13.974	0.000185352	0.00147551
ENSG00000126562	WNK4	2.67417	4.82256	10.344	0.00129896	0.00741738
ENSG00000161381	PLXDC1	2.67013	0.667278	9.21669	0.00239818	0.0121271
ENSG00000112139	MDGA1	2.66367	2.93719	6.14777	0.0131578	0.048278
ENSG00000188766	SPRED3	2.66186	0.697072	13.1242	0.000291504	0.00216655
ENSG00000187391	MAGI2	2.65999	2.95236	8.3347	0.00388949	0.0180467
ENSG00000100027	YPEL1	2.64875	3.09645	8.75438	0.00308859	0.0149756
ENSG00000092853	CLSPN	2.64679	7.37169	14.4027	0.000147588	0.00122873
ENSG00000104826	LHB	2.64651	-0.25302	8.4039	0.00374416	0.0175371
ENSG00000141756	FKBP10	2.64536	9.02756	7.18207	0.00736355	0.0304446
ENSG00000100503	NIN	2.6427	7.60073	19.1163	1.2299e-05	0.000154413
ENSG00000143507	DUSP10	2.64087	6.7256	25.3732	4.72442e-07	1.05202e-05
ENSG00000073711	PPP2R3A	2.63817	5.79605	20.2287	6.87131e-06	9.63176e-05
ENSG00000110799	VWF	2.63369	0.572941	12.4763	0.000412145	0.0028868
ENSG00000138798	EGF	2.63086	1.90619	7.51549	0.00611706	0.0261908
ENSG00000175766	EIF4E1B	2.63052	-2.51098	6.75546	0.00934613	0.0369533
ENSG00000161594	KLHL10	2.62817	-1.7789	11.0031	0.00090961	0.00556792
ENSG00000167723	TRPV3	2.62372	4.53069	6.16347	0.0130415	0.0480008
ENSG00000172379	ARNT2	2.62144	4.67501	7.37409	0.00661701	0.0279193
ENSG00000163171	CDC42EP3	2.6204	7.60424	8.469	0.0036125	0.0170553
ENSG00000167123	CERCAM	2.61908	7.03608	6.82961	0.0089659	0.0356618
ENSG00000161992	PRR35	2.61804	-1.28162	6.32283	0.0119193	0.0447053
ENSG00000185909	KLHDC8B	2.61268	4.79426	10.5034	0.00119156	0.00692265
ENSG00000144290	SLC4A10	2.61164	-1.27201	6.24001	0.0124896	0.0463372
ENSG00000175592	FOSL1	2.60671	8.5529	18.0418	2.16106e-05	0.000244704
ENSG00000223573	TINCR	2.60598	5.52529	6.11043	0.0134387	0.0490584
ENSG00000006016	CRLF1	2.6054	4.22339	15.7293	7.30825e-05	0.000687206
ENSG00000167414	GNG8	2.60341	-2.64028	6.10325	0.0134933	0.0492007
ENSG00000160097	FNDC5	2.60061	1.6555	6.87054	0.0087628	0.0350636
ENSG00000100055	CYTH4	2.59757	0.200356	9.53085	0.00202046	0.0105392
ENSG00000092067	CEBPE	2.59642	-2.62129	6.36238	0.0116565	0.0440051
ENSG00000178752	ERFE	2.59625	3.55843	6.83621	0.00893279	0.0355677
ENSG00000196628	TCF4	2.59072	4.94934	7.79654	0.00523465	0.0230316
ENSG00000144230	GPR17	2.59032	-1.03159	8.27596	0.00401735	0.0185336
ENSG00000088543	C3orf18	2.59011	3.30211	18.4892	1.70866e-05	0.000199879
ENSG00000128596	CCDC136	2.58434	3.13134	7.17197	0.00740515	0.0305831
ENSG00000140859	KIFC3	2.58115	7.21572	15.9932	6.35705e-05	0.000612008
ENSG00000111752	PHC1	2.57817	5.26435	9.9067	0.00164679	0.00891719
ENSG00000119121	TRPM6	2.57289	1.3076	7.40087	0.00651924	0.0275685
ENSG00000115963	RND3	2.57188	8.9022	22.5815	2.01418e-06	3.42108e-05
ENSG00000150938	CRIM1	2.56298	8.86965	32.5947	1.13523e-08	4.50586e-07
ENSG00000114790	ARHGEF26	2.56294	4.82016	6.71262	0.0095733	0.0376672
ENSG00000103522	IL21R	2.56263	-0.862485	11.6753	0.000633346	0.00412449
ENSG00000231852	CYP21A2	2.55917	-1.7549	9.79816	0.00174687	0.00936965
ENSG00000173917	HOXB2	2.55382	4.84304	6.44511	0.0111258	0.0423898
ENSG00000111727	HCFC2	2.55314	5.44405	26.8745	2.17101e-07	5.51875e-06
ENSG00000088280	ASAP3	2.55076	6.23921	9.3407	0.0022412	0.011451
ENSG00000133805	AMPD3	2.54886	4.51503	9.11947	0.00252903	0.0126923
ENSG00000170017	ALCAM	2.54879	9.94552	12.85	0.000337478	0.00245344
ENSG00000134594	RAB33A	2.54812	-0.444298	10.9484	0.000936832	0.00570368
ENSG00000204681	GABBR1	2.54776	5.34568	8.5498	0.00345561	0.0164573
ENSG00000114757	PEX5L	2.54454	-0.0914008	10.8828	0.000970624	0.00586522
ENSG00000134250	NOTCH2	2.54284	9.29219	23.7591	1.09177e-06	2.10753e-05
ENSG00000205269	TMEM170B	2.54036	3.91641	6.24027	0.0124877	0.0463372
ENSG00000157368	IL34	2.53508	0.405635	6.17712	0.0129413	0.0477157
ENSG00000178233	TMEM151B	2.53204	-0.294032	11.4464	0.000716308	0.00457273
ENSG00000171368	TPPP	2.53175	6.77943	7.9663	0.00476563	0.0213163
ENSG00000185614	INKA1	2.52841	0.675669	15.4454	8.49247e-05	0.000777869
ENSG00000147576	ADHFE1	2.52634	1.15572	11.0585	0.000882824	0.00543631
ENSG00000177363	LRRN4CL	2.52356	-0.332875	9.89096	0.00166093	0.0089768
ENSG00000171291	ZNF439	2.52338	3.64383	6.58213	0.0103007	0.0398502
ENSG00000142512	SIGLEC10	2.52211	-1.12783	8.55964	0.00343697	0.0163908
ENSG00000115041	KCNIP3	2.52156	3.48167	7.785	0.00526819	0.0231522
ENSG00000151914	DST	2.50593	9.6898	28.1025	1.15059e-07	3.16679e-06
ENSG00000129680	MAP7D3	2.50452	6.6652	7.63237	0.00573301	0.0248094
ENSG00000176909	MAMSTR	2.50221	2.61506	10.7299	0.00105417	0.0062762
ENSG00000170921	TANC2	2.49103	7.04409	9.36888	0.002207	0.0113222
ENSG00000151014	NOCT	2.48951	5.61642	15.8698	6.78514e-05	0.000646617
ENSG00000071794	HLTF	2.48887	8.12312	9.90039	0.00165244	0.00893518
ENSG00000146242	TPBG	2.47909	7.03307	8.22429	0.00413333	0.0189678
ENSG00000183615	FAM167B	2.47712	0.0725802	14.7371	0.00012359	0.00106803
ENSG00000165996	HACD1	2.47311	5.15665	9.90586	0.00164754	0.00891719
ENSG00000153558	FBXL2	2.47177	4.29504	16.3279	5.32736e-05	0.000527957
ENSG00000157087	ATP2B2	2.46957	-1.25759	7.17306	0.00740066	0.0305757
ENSG00000182534	MXRA7	2.46348	7.44867	9.79401	0.00175081	0.00938189
ENSG00000187905	LRRC74B	2.46087	-2.05147	7.51431	0.00612109	0.0261982
ENSG00000132702	HAPLN2	2.45012	0.0169363	6.21628	0.0126581	0.0468548
ENSG00000150995	ITPR1	2.44946	5.26786	9.6106	0.00193457	0.0101833
ENSG00000228672	PROB1	2.44582	3.01582	13.3189	0.000262742	0.00198011
ENSG00000142686	C1orf216	2.44578	5.34177	24.1695	8.82169e-07	1.75998e-05
ENSG00000131018	SYNE1	2.44308	5.14332	6.54585	0.0105129	0.0405077
ENSG00000167081	PBX3	2.44249	6.29049	21.1008	4.35741e-06	6.57213e-05
ENSG00000213949	ITGA1	2.43924	4.38935	10.9761	0.000922963	0.00563441
ENSG00000088726	TMEM40	2.43845	3.95635	9.7375	0.00180546	0.00962005
ENSG00000008735	MAPK8IP2	2.43822	5.25011	8.55193	0.00345155	0.0164465
ENSG00000187186	AL162231.1	2.43736	2.09665	16.145	5.86747e-05	0.000573663
ENSG00000155016	CYP2U1	2.43592	4.70194	8.77891	0.00304733	0.0148268
ENSG00000112210	RAB23	2.43454	6.56506	24.6487	6.87921e-07	1.42423e-05
ENSG00000100625	SIX4	2.43256	6.06204	9.64961	0.00189392	0.00999254
ENSG00000187800	PEAR1	2.42459	4.34743	6.22189	0.012618	0.046737
ENSG00000180616	SSTR2	2.42394	-0.747486	11.4752	0.000705304	0.00451012
ENSG00000166897	ELFN2	2.42196	5.66928	6.54451	0.0105208	0.0405077
ENSG00000151835	SACS	2.4211	7.53244	7.44149	0.00637373	0.0270543
ENSG00000162804	SNED1	2.41963	2.67714	14.6103	0.00013219	0.0011239
ENSG00000188343	FAM92A	2.41891	6.08891	16.1533	5.84177e-05	0.0005731
ENSG00000140993	TIGD7	2.41323	4.16956	10.1132	0.00147208	0.00814687
ENSG00000135318	NT5E	2.4063	8.47414	6.33745	0.0118215	0.0443825
ENSG00000114473	IQCG	2.40327	4.99156	21.524	3.49423e-06	5.46704e-05
ENSG00000184144	CNTN2	2.40234	-1.93227	9.23244	0.00237765	0.0120389
ENSG00000135406	PRPH	2.39878	0.579533	7.21386	0.00723427	0.0300309
ENSG00000111077	TNS2	2.39768	5.70639	13.4997	0.000238598	0.00183109
ENSG00000171777	RASGRP4	2.39756	-1.44731	7.13315	0.00756718	0.0311613
ENSG00000152104	PTPN14	2.39737	8.3313	20.0336	7.60948e-06	0.000104861
ENSG00000145623	OSMR	2.39648	8.25369	11.1393	0.000845189	0.00525318
ENSG00000153253	SCN3A	2.39598	-1.55586	6.09418	0.0135628	0.0494115
ENSG00000143845	ETNK2	2.39218	5.04366	6.68653	0.0097144	0.0381163
ENSG00000119714	GPR68	2.38998	1.81303	9.37683	0.00219745	0.0112886
ENSG00000117525	F3	2.38194	9.64143	8.45745	0.00363551	0.0171354
ENSG00000004399	PLXND1	2.37912	6.84446	7.38549	0.0065752	0.0277636
ENSG00000154134	ROBO3	2.36565	4.56143	6.38449	0.0115122	0.043583
ENSG00000234465	PINLYP	2.36305	-0.111737	8.05984	0.00452573	0.0204371
ENSG00000164440	TXLNB	2.35575	-1.71819	8.80201	0.00300898	0.0146651
ENSG00000127946	HIP1	2.34383	6.92687	10.6987	0.00107209	0.00636282
ENSG00000005448	WDR54	2.33661	5.48349	18.7169	1.51636e-05	0.000181707
ENSG00000135835	KIAA1614	2.3307	2.84561	20.1084	7.31734e-06	0.000101563
ENSG00000161082	CELF5	2.32335	1.07868	9.40236	0.00216707	0.0111579
ENSG00000105926	MPP6	2.32307	6.5424	7.58086	0.00589912	0.0254116
ENSG00000133466	C1QTNF6	2.32238	5.66769	15.0036	0.000107307	0.000953537
ENSG00000104154	SLC30A4	2.30967	4.45552	8.12003	0.00437787	0.0198726
ENSG00000128881	TTBK2	2.30615	6.42839	20.3175	6.55992e-06	9.25992e-05
ENSG00000205129	C4orf47	2.28273	0.187249	6.34661	0.0117606	0.0442419
ENSG00000018408	WWTR1	2.28198	6.75565	7.09495	0.00773016	0.0317274
ENSG00000166997	CNPY4	2.27583	4.62701	21.5132	3.51398e-06	5.48241e-05
ENSG00000106823	ECM2	2.2745	1.35676	6.45941	0.0110366	0.0421208
ENSG00000123080	CDKN2C	2.27399	6.25743	12.874	0.000333171	0.00242837
ENSG00000158301	GPRASP2	2.27204	4.6918	17.4995	2.87382e-05	0.000313185
ENSG00000111860	CEP85L	2.26802	4.68205	8.16375	0.00427359	0.0194931
ENSG00000150636	CCDC102B	2.26435	2.46745	6.09303	0.0135716	0.0494116
ENSG00000105976	MET	2.26368	10.7503	10.3776	0.00127551	0.00731302
ENSG00000173809	TDRD12	2.2613	0.135448	6.53713	0.0105646	0.0406207
ENSG00000118503	TNFAIP3	2.25393	6.8683	15.9275	6.58144e-05	0.000630198
ENSG00000007372	PAX6	2.24945	4.52044	8.34865	0.00385974	0.0179603
ENSG00000073670	ADAM11	2.2451	3.23477	7.82021	0.00516653	0.0228296
ENSG00000039560	RAI14	2.24355	8.16557	14.1794	0.000166177	0.00134946
ENSG00000162931	TRIM17	2.24235	1.81693	6.38762	0.0114919	0.0435207
ENSG00000129226	CD68	2.21985	7.93543	6.86245	0.0088026	0.0351731
ENSG00000182197	EXT1	2.21962	8.50993	21.8377	2.96706e-06	4.75402e-05
ENSG00000170271	FAXDC2	2.20174	2.74358	7.35832	0.0066753	0.0280884
ENSG00000130751	NPAS1	2.20058	3.36813	6.83405	0.00894363	0.0355983
ENSG00000146112	PPP1R18	2.19889	8.11579	12.8202	0.000342888	0.00248638
ENSG00000125730	C3	2.1981	7.90668	6.13892	0.0132238	0.0484887
ENSG00000177283	FZD8	2.19426	2.9737	6.93963	0.00843067	0.0339266
ENSG00000144815	NXPE3	2.18731	5.31468	10.4676	0.00121489	0.00701521
ENSG00000138613	APH1B	2.18629	4.54584	7.90931	0.00491811	0.02186
ENSG00000124508	BTN2A2	2.18318	5.01631	12.2185	0.000473185	0.00323816
ENSG00000084731	KIF3C	2.18079	5.9055	10.1135	0.00147189	0.00814687
ENSG00000069869	NEDD4	2.18018	7.86034	11.6601	0.00063854	0.00415125
ENSG00000134278	SPIRE1	2.17781	7.1316	10.656	0.00109712	0.006474
ENSG00000020577	SAMD4A	2.17692	6.8693	7.67143	0.00561019	0.0243747
ENSG00000140545	MFGE8	2.16473	8.03017	6.89886	0.00862507	0.0346104
ENSG00000136114	THSD1	2.1593	3.03119	7.58717	0.00587853	0.0253325
ENSG00000112414	ADGRG6	2.15621	8.34435	13.2467	0.000273056	0.002051
ENSG00000075223	SEMA3C	2.15498	7.93831	17.9933	2.21688e-05	0.000250273
ENSG00000118965	WDR35	2.15031	5.75941	8.62774	0.00331082	0.0158964
ENSG00000075391	RASAL2	2.14082	7.77709	25.5491	4.31277e-07	9.80044e-06
ENSG00000160991	ORAI2	2.13954	6.93151	7.52011	0.00610139	0.0261486
ENSG00000169105	CHST14	2.12862	5.91451	13.3849	0.000253659	0.00192353
ENSG00000004700	RECQL	2.12827	7.7815	20.4294	6.18713e-06	8.75955e-05
ENSG00000124104	SNX21	2.11745	5.75389	21.2414	4.04921e-06	6.18147e-05
ENSG00000169239	CA5B	2.11737	5.36539	9.91083	0.00164309	0.00890163
ENSG00000102003	SYP	2.10642	3.34349	7.29591	0.00691117	0.0288804
ENSG00000188130	MAPK12	2.10549	6.35075	11.9875	0.000535583	0.0035977
ENSG00000151240	DIP2C	2.10545	6.07897	9.52968	0.00202176	0.0105392
ENSG00000143702	CEP170	2.10534	7.39575	16.0424	6.19408e-05	0.000598867
ENSG00000186318	BACE1	2.10283	6.68828	20.0243	7.64636e-06	0.000105118
ENSG00000142920	AZIN2	2.10274	2.68183	7.16497	0.00743407	0.0306913
ENSG00000111145	ELK3	2.10195	7.16258	19.7112	9.00734e-06	0.000120013
ENSG00000198933	TBKBP1	2.10143	5.27418	6.74706	0.00939024	0.0370646
ENSG00000137693	YAP1	2.09443	10.5641	14.4234	0.00014598	0.00121924
ENSG00000133789	SWAP70	2.09147	8.07544	11.6743	0.000633696	0.00412449
ENSG00000070404	FSTL3	2.08775	7.55195	13.3846	0.000253705	0.00192353
ENSG00000151718	WWC2	2.0815	7.46993	8.83816	0.00294997	0.0144147
ENSG00000010818	HIVEP2	2.08036	7.43769	16.5658	4.69915e-05	0.000474614
ENSG00000163704	PRRT3	2.07902	3.39792	10.4302	0.00123971	0.00714761
ENSG00000116678	LEPR	2.07859	5.38303	8.37232	0.00380979	0.017779
ENSG00000173269	MMRN2	2.07158	3.51499	6.84443	0.00889179	0.0354419
ENSG00000108309	RUNDC3A	2.07009	0.48024	9.74637	0.00179677	0.00958278
ENSG00000175600	SUGCT	2.06769	2.71392	6.24031	0.0124875	0.0463372
ENSG00000177034	MTX3	2.05972	5.61409	8.42128	0.00370854	0.0173926
ENSG00000231256	CFAP97D1	2.05968	-1.44685	10.17	0.00142745	0.00796614
ENSG00000130270	ATP8B3	2.05574	3.85506	6.74701	0.0093905	0.0370646
ENSG00000196968	FUT11	2.05518	5.43374	16.7515	4.26083e-05	0.000437373
ENSG00000187123	LYPD6	2.04309	5.71934	6.06649	0.013777	0.0499505
ENSG00000048471	SNX29	2.04164	5.96226	15.762	7.18313e-05	0.000679394
ENSG00000164983	TMEM65	2.03623	6.56475	10.1634	0.00143254	0.00797901
ENSG00000188026	RILPL1	2.03132	5.25412	15.3897	8.74626e-05	0.000798529
ENSG00000162616	DNAJB4	2.02679	5.96018	17.9063	2.32054e-05	0.000260416
ENSG00000112200	ZNF451	2.02587	8.31199	14.7561	0.000122348	0.00105891
ENSG00000146426	TIAM2	2.02272	4.76839	14.5235	0.000138423	0.00116506
ENSG00000143067	ZNF697	2.02253	5.98662	11.6872	0.000629323	0.00410312
ENSG00000042062	RIPOR3	2.01717	0.434162	6.08272	0.013651	0.0495891
ENSG00000066697	MSANTD3	2.0051	6.73836	15.5705	7.94846e-05	0.000736991
ENSG00000213859	KCTD11	2.0036	6.44624	12.8336	0.000340459	0.00247193
ENSG00000166924	NYAP1	2.00172	2.02851	7.65951	0.00564739	0.0245116
ENSG00000134285	FKBP11	-2.00499	6.24847	9.74322	0.00179986	0.00959471
ENSG00000088367	EPB41L1	-2.00554	8.91917	14.7023	0.000125895	0.0010838
ENSG00000141527	CARD14	-2.00953	3.10976	6.48699	0.0108667	0.0415986
ENSG00000145675	PIK3R1	-2.01083	8.07975	13.0648	0.000300892	0.00222173
ENSG00000137825	ITPKA	-2.01504	5.44798	7.35838	0.00667511	0.0280884
ENSG00000135437	RDH5	-2.01581	3.87354	7.63282	0.00573155	0.0248094
ENSG00000112812	PRSS16	-2.01952	5.40546	7.32855	0.00678678	0.028455
ENSG00000197822	OCLN	-2.02218	7.30079	12.5475	0.000396728	0.00280116
ENSG00000132170	PPARG	-2.02816	8.41337	10.8887	0.000967537	0.00585282
ENSG00000083807	SLC27A5	-2.02949	4.72882	9.02769	0.0026592	0.0132049
ENSG00000114737	CISH	-2.05131	4.00944	9.0718	0.00259581	0.0129756
ENSG00000197279	ZNF165	-2.05593	5.70741	11.4646	0.000709353	0.00453344
ENSG00000196812	ZSCAN16	-2.05669	4.26601	6.59395	0.0102326	0.0396654
ENSG00000242110	AMACR	-2.06846	6.37763	17.3898	3.04457e-05	0.000328001
ENSG00000141934	PLPP2	-2.07668	7.87976	12.5132	0.000404085	0.00284443
ENSG00000115884	SDC1	-2.07724	9.75133	12.4992	0.00040713	0.00285698
ENSG00000197892	KIF13B	-2.09146	7.86441	17.1811	3.39799e-05	0.000360583
ENSG00000254087	LYN	-2.09347	7.55459	11.4549	0.000713075	0.00455466
ENSG00000172458	IL17D	-2.09372	5.12039	10.9385	0.000941864	0.00571893
ENSG00000182580	EPHB3	-2.09558	6.20353	6.7105	0.00958469	0.0376971
ENSG00000258818	RNASE4	-2.09639	5.87232	7.60875	0.00580857	0.0250788
ENSG00000204991	SPIRE2	-2.10876	7.18502	11.7678	0.000602634	0.00395647
ENSG00000165171	METTL27	-2.11507	4.45368	6.11005	0.0134415	0.0490584
ENSG00000132846	ZBED3	-2.11527	6.41696	11.2075	0.000814667	0.00508302
ENSG00000112378	PERP	-2.11659	10.4848	11.846	0.000577857	0.00383836
ENSG00000106537	TSPAN13	-2.12833	8.75468	10.5121	0.00118593	0.0068981
ENSG00000164976	MYORG	-2.13834	7.35664	8.96597	0.00275054	0.0135633
ENSG00000163947	ARHGEF3	-2.13995	6.96303	13.0852	0.000297643	0.0022035
ENSG00000136098	NEK3	-2.15094	5.59283	8.16897	0.00426131	0.0194606
ENSG00000170545	SMAGP	-2.15995	7.61371	14.6201	0.000131502	0.00112015
ENSG00000198324	PHETA1	-2.16134	7.03866	14.2804	0.000157494	0.00129569
ENSG00000160796	NBEAL2	-2.16137	8.13306	13.6462	0.000220684	0.00171245
ENSG00000064547	LPAR2	-2.16513	6.04323	14.5631	0.000135546	0.00114596
ENSG00000130762	ARHGEF16	-2.17002	7.48835	8.72033	0.00314681	0.0152337
ENSG00000163406	SLC15A2	-2.17901	2.22147	7.49413	0.00619004	0.0264533
ENSG00000138772	ANXA3	-2.18119	9.22683	9.68368	0.00185911	0.00984565
ENSG00000257594	GALNT4	-2.18677	6.93702	10.7443	0.001046	0.00623654
ENSG00000134256	CD101	-2.1921	1.02022	7.49695	0.00618036	0.0264218
ENSG00000072201	LNX1	-2.19296	4.70336	8.8669	0.00290387	0.0142263
ENSG00000137842	TMEM62	-2.19414	6.54754	24.2503	8.45935e-07	1.70271e-05
ENSG00000158769	F11R	-2.1987	9.38684	10.3721	0.00127933	0.00732746
ENSG00000076864	RAP1GAP	-2.20016	6.51748	7.98997	0.00470372	0.021096
ENSG00000125246	CLYBL	-2.20499	4.14341	9.83043	0.00171649	0.00923734
ENSG00000133131	MORC4	-2.20868	8.1513	15.0172	0.000106534	0.000948159
ENSG00000128886	ELL3	-2.20965	4.54662	10.001	0.00156459	0.00855418
ENSG00000120278	PLEKHG1	-2.21008	6.00294	6.65686	0.00987749	0.0386222
ENSG00000062282	DGAT2	-2.21524	7.24198	8.98785	0.00271781	0.0134311
ENSG00000134909	ARHGAP32	-2.21535	8.48847	18.2923	1.89475e-05	0.000217377
ENSG00000071073	MGAT4A	-2.2239	6.47593	6.40856	0.0113571	0.0431114
ENSG00000196975	ANXA4	-2.22762	9.19673	21.1927	4.15352e-06	6.31514e-05
ENSG00000164181	ELOVL7	-2.23349	6.60473	10.6528	0.00109901	0.00647576
ENSG00000109861	CTSC	-2.23377	9.54097	12.1542	0.000489767	0.00333126
ENSG00000213901	SLC23A3	-2.24697	3.18037	10.2755	0.00134809	0.00762478
ENSG00000109265	CRACD	-2.25109	5.79971	6.44547	0.0111236	0.0423898
ENSG00000169242	EFNA1	-2.25377	7.12805	10.391	0.00126629	0.00727489
ENSG00000114993	RTKN	-2.25627	7.5177	25.0819	5.49451e-07	1.18841e-05
ENSG00000100558	PLEK2	-2.25643	8.24324	8.80602	0.00300238	0.0146392
ENSG00000204257	HLA-DMA	-2.25849	5.26866	6.91096	0.00856692	0.0344015
ENSG00000143590	EFNA3	-2.2592	5.68819	9.48942	0.00206661	0.0107532
ENSG00000181274	FRAT2	-2.26089	6.54947	24.8762	6.11324e-07	1.295e-05
ENSG00000178821	TMEM52	-2.27081	4.11793	6.26564	0.0123102	0.045822
ENSG00000152926	ZNF117	-2.27126	6.75683	7.86946	0.00502768	0.0223032
ENSG00000133056	PIK3C2B	-2.27215	7.86974	18.5818	1.62768e-05	0.000192396
ENSG00000122035	RASL11A	-2.27247	5.56153	6.4684	0.0109809	0.0419649
ENSG00000105755	ETHE1	-2.27662	7.61902	14.1402	0.000169682	0.001373
ENSG00000174292	TNK1	-2.29275	5.66179	7.97428	0.00474467	0.0212309
ENSG00000165105	RASEF	-2.29654	7.42232	7.5724	0.00592687	0.0255117
ENSG00000118557	PMFBP1	-2.29937	2.22591	6.4444	0.0111302	0.0423923
ENSG00000110628	SLC22A18	-2.30839	6.76768	8.91623	0.00282647	0.0138712
ENSG00000163251	FZD5	-2.31159	7.3024	28.4485	9.62238e-08	2.73488e-06
ENSG00000174514	MFSD4A	-2.32814	3.52244	8.62912	0.00330832	0.0158912
ENSG00000105327	BBC3	-2.33112	6.58412	12.8627	0.000335188	0.00243993
ENSG00000141542	RAB40B	-2.33347	6.51427	19.4898	1.01137e-05	0.000131804
ENSG00000099219	ERMP1	-2.33586	8.38234	24.1013	9.13993e-07	1.82026e-05
ENSG00000135407	AVIL	-2.33875	3.37848	8.58964	0.0033808	0.0161707
ENSG00000145247	OCIAD2	-2.34468	7.93948	6.73195	0.00947008	0.037326
ENSG00000147804	SLC39A4	-2.35688	7.15919	6.08305	0.0136485	0.0495891
ENSG00000104361	NIPAL2	-2.3584	6.13461	25.5483	4.31455e-07	9.80044e-06
ENSG00000129514	FOXA1	-2.36138	7.03739	7.12004	0.00762269	0.031367
ENSG00000167105	TMEM92	-2.36619	4.42887	7.35276	0.00669599	0.0281379
ENSG00000146409	SLC18B1	-2.36761	6.21667	22.402	2.21145e-06	3.70059e-05
ENSG00000091490	SEL1L3	-2.37003	9.19519	12.2121	0.000474795	0.00324348
ENSG00000123358	NR4A1	-2.37349	7.64539	7.92714	0.00486987	0.0216882
ENSG00000021355	SERPINB1	-2.37789	9.51316	10.5119	0.00118607	0.0068981
ENSG00000166123	GPT2	-2.38065	8.65134	25.347	4.78888e-07	1.0604e-05
ENSG00000188732	FAM221A	-2.38223	4.73422	8.45436	0.0036417	0.0171574
ENSG00000001084	GCLC	-2.38251	8.68688	12.9548	0.000319104	0.00233804
ENSG00000135069	PSAT1	-2.38299	9.56262	8.43727	0.00367608	0.017305
ENSG00000110723	EXPH5	-2.3899	7.32077	6.20418	0.0127449	0.0470992
ENSG00000073605	GSDMB	-2.39202	6.35638	13.1764	0.000283504	0.00211963
ENSG00000241484	ARHGAP8	-2.41306	6.36014	7.1041	0.00769079	0.0315898
ENSG00000170412	GPRC5C	-2.41404	7.85377	6.78293	0.00920338	0.0365037
ENSG00000156453	PCDH1	-2.42389	8.75917	8.56155	0.00343337	0.0163805
ENSG00000168453	HR	-2.42504	7.52153	6.249	0.0124264	0.0461481
ENSG00000198246	SLC29A3	-2.43757	6.16466	9.29516	0.00229759	0.0117179
ENSG00000142675	CNKSR1	-2.44047	6.38864	11.6983	0.000625577	0.0040834
ENSG00000171219	CDC42BPG	-2.44409	6.96571	8.99657	0.00270487	0.0133789
ENSG00000164626	KCNK5	-2.452	6.57005	7.09403	0.0077341	0.0317274
ENSG00000183111	ARHGEF37	-2.45353	5.32121	8.93118	0.00280343	0.013776
ENSG00000186205	MTARC1	-2.47099	6.12257	8.42198	0.00370713	0.0173926
ENSG00000157470	FAM81A	-2.47418	5.72203	10.5346	0.00117162	0.0068387
ENSG00000076944	STXBP2	-2.47911	7.74482	14.2545	0.000159682	0.00130948
ENSG00000167799	NUDT8	-2.48465	5.14901	14.6639	0.000128481	0.00110105
ENSG00000188747	NOXA1	-2.48803	4.37084	7.33665	0.00675626	0.0283588
ENSG00000170345	FOS	-2.49756	10.4419	6.52845	0.0106162	0.040764
ENSG00000005073	HOXA11	-2.49795	4.94591	6.89609	0.00863847	0.0346519
ENSG00000141448	GATA6	-2.49911	8.00438	16.0534	6.15822e-05	0.000597443
ENSG00000106789	CORO2A	-2.50212	7.8358	13.9778	0.000184985	0.00147451
ENSG00000143674	MAP3K21	-2.50253	6.71026	15.1055	0.000101668	0.000913474
ENSG00000104140	RHOV	-2.50672	5.21093	7.17454	0.00739456	0.0305616
ENSG00000136828	RALGPS1	-2.5125	6.11397	14.3969	0.000148044	0.00122957
ENSG00000100889	PCK2	-2.51473	8.80402	14.3035	0.000155572	0.00128361
ENSG00000243989	ACY1	-2.52107	7.61845	15.0395	0.000105285	0.000940001
ENSG00000162337	LRP5	-2.52483	9.55041	11.2743	0.000785879	0.00494706
ENSG00000167701	GPT	-2.53066	2.87357	8.70702	0.00316986	0.015317
ENSG00000101187	SLCO4A1	-2.53329	7.76541	8.45973	0.00363096	0.017126
ENSG00000085831	TTC39A	-2.55489	5.83898	8.66302	0.00324732	0.015638
ENSG00000253958	CLDN23	-2.56186	5.51425	7.34249	0.00673434	0.0282772
ENSG00000095203	EPB41L4B	-2.5637	7.95917	14.958	0.000109929	0.000968475
ENSG00000170190	SLC16A5	-2.56527	7.27856	7.08787	0.00776074	0.0317847
ENSG00000137266	SLC22A23	-2.56639	7.21671	11.2707	0.000787401	0.00495113
ENSG00000119514	GALNT12	-2.57534	6.79685	17.2287	3.31393e-05	0.000352323
ENSG00000214530	STARD10	-2.5999	8.78785	14.0852	0.000174711	0.00140558
ENSG00000080031	PTPRH	-2.60705	6.92509	11.2658	0.000789489	0.0049615
ENSG00000174669	SLC29A2	-2.61438	6.50855	8.42659	0.00369774	0.0173757
ENSG00000182264	IZUMO1	-2.61643	1.28887	7.373	0.00662105	0.0279215
ENSG00000273045	C2orf15	-2.61778	3.91559	15.0199	0.000106385	0.000947577
ENSG00000142677	IL22RA1	-2.62331	5.64013	10.2688	0.001353	0.00764492
ENSG00000158486	DNAH3	-2.6364	2.73147	8.76203	0.00307566	0.0149327
ENSG00000139832	RAB20	-2.6446	6.63488	25.4685	4.49661e-07	1.00816e-05
ENSG00000112379	ARFGEF3	-2.64475	7.56324	17.0904	3.56422e-05	0.000375405
ENSG00000127084	FGD3	-2.64521	4.52504	6.80541	0.00908819	0.0361102
ENSG00000182957	SPATA13	-2.64602	7.2457	16.476	4.92695e-05	0.000493218
ENSG00000134627	PIWIL4	-2.65257	4.71719	10.0152	0.00155257	0.0084967
ENSG00000168143	FAM83B	-2.65266	6.42018	9.9595	0.00160021	0.00871527
ENSG00000162777	DENND2D	-2.65354	6.00731	7.49755	0.00617831	0.0264218
ENSG00000184992	BRI3BP	-2.65377	9.3219	11.1757	0.000828767	0.00515961
ENSG00000188738	FSIP2	-2.66163	3.18212	7.59071	0.00586699	0.0252925
ENSG00000106688	SLC1A1	-2.66594	5.9858	6.39422	0.0114492	0.0433882
ENSG00000204618	RNF39	-2.68296	4.82947	9.16561	0.00246605	0.0124203
ENSG00000149260	CAPN5	-2.68594	7.97446	12.3198	0.000448181	0.00309891
ENSG00000134317	GRHL1	-2.68642	6.59017	10.2829	0.00134272	0.00760202
ENSG00000162105	SHANK2	-2.68711	6.25226	9.57269	0.00197494	0.0103668
ENSG00000106078	COBL	-2.69291	7.75048	9.04287	0.00263722	0.0131246
ENSG00000159314	ARHGAP27	-2.69836	8.1441	17.3404	3.12468e-05	0.000335354
ENSG00000138030	KHK	-2.70691	5.32858	14.7114	0.000125286	0.00107939
ENSG00000178078	STAP2	-2.712	7.09641	17.0239	3.69115e-05	0.000385543
ENSG00000143217	NECTIN4	-2.71814	6.24056	7.74648	0.00538174	0.0235688
ENSG00000110042	DTX4	-2.72945	8.22066	18.8501	1.41406e-05	0.00017237
ENSG00000170537	TMC7	-2.73903	6.16034	14.9801	0.000108654	0.000959478
ENSG00000184363	PKP3	-2.75017	8.87562	16.4873	4.89763e-05	0.000490717
ENSG00000100290	BIK	-2.7593	5.5608	11.9149	0.000556863	0.00371636
ENSG00000082458	DLG3	-2.76442	8.2282	26.2394	3.01604e-07	7.27684e-06
ENSG00000090776	EFNB1	-2.77802	8.26958	20.0206	7.66129e-06	0.000105175
ENSG00000164050	PLXNB1	-2.77976	8.46344	16.9364	3.86541e-05	0.000400783
ENSG00000008323	PLEKHG6	-2.78562	6.91099	8.73522	0.00312122	0.0151209
ENSG00000163734	CXCL3	-2.78832	5.36385	7.05068	0.00792352	0.0322761
ENSG00000178814	OPLAH	-2.80054	7.37084	11.6829	0.000630764	0.00411014
ENSG00000135540	NHSL1	-2.80117	7.0107	19.192	1.18211e-05	0.000149408
ENSG00000137709	POU2F3	-2.80234	3.32939	6.36849	0.0116164	0.0438895
ENSG00000180921	FAM83H	-2.81072	9.33211	11.7001	0.000624964	0.0040834
ENSG00000186088	GSAP	-2.81563	5.99626	10.3155	0.00131916	0.0075025
ENSG00000115255	REEP6	-2.8235	6.91246	10.5321	0.00117319	0.00684431
ENSG00000102996	MMP15	-2.8404	8.54788	21.0541	4.46491e-06	6.69938e-05
ENSG00000165475	CRYL1	-2.84409	6.85129	14.8591	0.00011585	0.00101041
ENSG00000125398	SOX9	-2.84698	9.10227	15.1601	9.87706e-05	0.000889564
ENSG00000163347	CLDN1	-2.84791	8.60484	12.0303	0.000523417	0.00353065
ENSG00000085552	IGSF9	-2.85735	6.11905	9.86951	0.00168041	0.00907339
ENSG00000136379	ABHD17C	-2.86113	8.16278	33.2616	8.05572e-09	3.3876e-07
ENSG00000184730	APOBR	-2.86418	2.07307	6.10977	0.0134437	0.0490584
ENSG00000129422	MTUS1	-2.86827	8.22722	14.8833	0.000114373	0.00100061
ENSG00000139629	GALNT6	-2.88293	7.53085	9.16406	0.00246814	0.0124253
ENSG00000058085	LAMC2	-2.8864	9.69764	14.0489	0.000178117	0.00142695
ENSG00000162878	PKDCC	-2.91099	7.72627	11.3536	0.000753038	0.00476686
ENSG00000131242	RAB11FIP4	-2.91202	7.88693	12.581	0.000389695	0.00276273
ENSG00000026297	RNASET2	-2.91982	7.8187	32.3513	1.2867e-08	4.96764e-07
ENSG00000162078	ZG16B	-2.92074	3.9627	7.48275	0.00622929	0.0265909
ENSG00000050327	ARHGEF5	-2.92287	5.9666	12.4711	0.00041329	0.00289303
ENSG00000168952	STXBP6	-2.92795	5.61032	12.9872	0.000313634	0.00230528
ENSG00000099282	TSPAN15	-2.93478	7.9479	17.7045	2.58014e-05	0.000285304
ENSG00000086159	AQP6	-2.93588	0.986155	6.40168	0.0114012	0.0432353
ENSG00000141854	MISP3	-2.94004	4.94374	12.4791	0.000411539	0.00288434
ENSG00000182240	BACE2	-2.94265	9.1357	11.1517	0.000839541	0.00522094
ENSG00000172164	SNTB1	-2.96377	7.76745	9.22885	0.00238231	0.0120522
ENSG00000189120	SP6	-2.97205	6.56638	8.30593	0.00395158	0.0182748
ENSG00000054690	PLEKHH1	-2.9752	6.74607	27.0548	1.97769e-07	5.06144e-06
ENSG00000120875	DUSP4	-2.98031	9.41475	11.1225	0.000852868	0.00528928
ENSG00000204128	C2orf72	-2.98047	6.3677	8.76196	0.00307579	0.0149327
ENSG00000076826	CAMSAP3	-2.98158	7.03991	14.0752	0.000175645	0.00140915
ENSG00000183044	ABAT	-2.98244	5.99104	8.95263	0.00277071	0.0136389
ENSG00000155792	DEPTOR	-2.9861	5.77351	12.3307	0.000445564	0.00308271
ENSG00000187994	RINL	-2.9862	5.23855	10.2053	0.00140038	0.00784601
ENSG00000167880	EVPL	-2.99953	8.69141	13.8396	0.000199094	0.00157233
ENSG00000116574	RHOU	-3.00423	7.76685	10.1892	0.00141267	0.00790314
ENSG00000116711	PLA2G4A	-3.00706	6.52726	7.08595	0.00776906	0.0318073
ENSG00000129007	CALML4	-3.01138	7.2053	17.6153	2.704e-05	0.000297835
ENSG00000188559	RALGAPA2	-3.01433	7.83745	43.1952	4.95415e-11	4.06096e-09
ENSG00000136237	RAPGEF5	-3.03721	5.90835	31.0319	2.53825e-08	8.89366e-07
ENSG00000129521	EGLN3	-3.03909	6.98957	8.43876	0.00367308	0.017298
ENSG00000137843	PAK6	-3.04022	5.79952	9.34099	0.00224084	0.011451
ENSG00000111679	PTPN6	-3.04392	6.41571	17.4473	2.95379e-05	0.000319439
ENSG00000106686	SPATA6L	-3.04403	3.43751	14.5122	0.000139258	0.00117122
ENSG00000084110	HAL	-3.04729	1.17774	10.1946	0.00140855	0.00788395
ENSG00000120471	TP53AIP1	-3.04979	-0.124961	7.70711	0.00550037	0.0239677
ENSG00000161921	CXCL16	-3.05331	8.44642	13.3284	0.000261416	0.00197274
ENSG00000170293	CMTM8	-3.05467	5.57362	17.3102	3.17485e-05	0.000340416
ENSG00000142765	SYTL1	-3.05814	6.74933	14.4877	0.000141077	0.00118563
ENSG00000141655	TNFRSF11A	-3.08985	6.76298	19.3394	1.09423e-05	0.00014034
ENSG00000172602	RND1	-3.09211	3.51752	13.1936	0.000280907	0.00210392
ENSG00000163694	RBM47	-3.09664	8.72354	23.4043	1.31284e-06	2.43856e-05
ENSG00000120149	MSX2	-3.09844	7.25825	11.5852	0.00066478	0.00429224
ENSG00000149922	TBX6	-3.09953	2.96542	9.69685	0.00184584	0.00978909
ENSG00000085871	MGST2	-3.10382	6.94143	20.6346	5.55824e-06	8.092e-05
ENSG00000007129	CEACAM21	-3.10636	-1.92882	7.06074	0.00787913	0.0321532
ENSG00000131781	FMO5	-3.11075	3.97657	12.627	0.000380213	0.00271013
ENSG00000155629	PIK3AP1	-3.11092	5.56395	15.8319	6.92251e-05	0.000657493
ENSG00000158856	DMTN	-3.1111	6.87077	15.2174	9.58165e-05	0.000867796
ENSG00000170684	ZNF296	-3.11398	4.02186	20.0008	7.74115e-06	0.000105886
ENSG00000128965	CHAC1	-3.12534	6.70679	24.0921	9.18377e-07	1.82578e-05
ENSG00000141497	ZMYND15	-3.12582	3.44794	11.3839	0.000740833	0.00470011
ENSG00000156711	MAPK13	-3.12971	7.67117	17.4563	2.93995e-05	0.000318828
ENSG00000161267	BDH1	-3.13585	7.22264	10.9282	0.000947101	0.00574148
ENSG00000128917	DLL4	-3.1485	3.07623	10.1292	0.00145943	0.00809266
ENSG00000167895	TMC8	-3.15385	4.32515	9.67396	0.00186898	0.00987763
ENSG00000111490	TBC1D30	-3.15769	6.08288	20.9247	4.77688e-06	7.11938e-05
ENSG00000160588	MPZL3	-3.15823	6.81427	16.0618	6.13091e-05	0.000595303
ENSG00000169403	PTAFR	-3.16696	4.72184	7.80128	0.00522092	0.0229891
ENSG00000153234	NR4A2	-3.17537	4.77383	16.8956	3.94935e-05	0.000408737
ENSG00000160188	RSPH1	-3.17731	3.67171	11.0099	0.000906266	0.00555045
ENSG00000198626	RYR2	-3.18023	4.73402	7.55041	0.00599963	0.0257881
ENSG00000198435	NRARP	-3.18043	6.71394	15.7373	7.2774e-05	0.000684875
ENSG00000112559	MDFI	-3.18408	7.05173	11.8379	0.000580382	0.00385287
ENSG00000122547	EEPD1	-3.1843	7.13935	14.3697	0.000150199	0.00124473
ENSG00000165795	NDRG2	-3.18481	7.2694	9.46538	0.00209385	0.0108451
ENSG00000168237	GLYCTK	-3.18851	6.38722	19.2624	1.13927e-05	0.000145457
ENSG00000174607	UGT8	-3.21437	7.02052	10.8264	0.00100061	0.00601112
ENSG00000163746	PLSCR2	-3.22584	-1.83777	7.1941	0.00731437	0.0302966
ENSG00000140403	DNAJA4	-3.22695	7.39296	9.51304	0.00204017	0.0106303
ENSG00000152939	MARVELD2	-3.22853	6.75444	25.077	5.50865e-07	1.1892e-05
ENSG00000106327	TFR2	-3.2403	4.29841	6.66242	0.00984674	0.038533
ENSG00000155465	SLC7A7	-3.24214	7.28132	8.04548	0.00456173	0.0205833
ENSG00000134755	DSC2	-3.25091	7.74572	9.70578	0.00183689	0.00975077
ENSG00000124107	SLPI	-3.25293	7.55179	8.42927	0.00369228	0.0173596
ENSG00000100031	GGT1	-3.29106	6.31496	7.45922	0.00631122	0.0268696
ENSG00000103044	HAS3	-3.29857	6.67523	8.38827	0.0037765	0.0176528
ENSG00000184574	LPAR5	-3.30321	5.38551	11.5745	0.000668622	0.00430761
ENSG00000189283	FHIT	-3.3127	2.99279	11.2078	0.000814547	0.00508302
ENSG00000172828	CES3	-3.31766	4.83987	9.77728	0.00176682	0.00944977
ENSG00000163599	CTLA4	-3.31921	-2.35982	6.37882	0.011549	0.0436787
ENSG00000162390	ACOT11	-3.3297	6.50825	14.401	0.000147726	0.00122873
ENSG00000173890	GPR160	-3.33465	6.35403	30.2232	3.8507e-08	1.26994e-06
ENSG00000184828	ZBTB7C	-3.34568	5.76965	6.62349	0.0100643	0.0391765
ENSG00000101670	LIPG	-3.34764	7.44344	8.55404	0.00344757	0.0164344
ENSG00000172794	RAB37	-3.35003	1.85958	8.35725	0.00384151	0.0178828
ENSG00000120756	PLS1	-3.35027	8.79794	32.3205	1.30729e-08	5.02995e-07
ENSG00000091262	ABCC6	-3.35621	3.95215	9.35518	0.00222356	0.0113866
ENSG00000108352	RAPGEFL1	-3.35644	7.19113	11.0867	0.000869496	0.00537766
ENSG00000232070	TMEM253	-3.36223	3.14038	14.155	0.000168348	0.00136318
ENSG00000103811	CTSH	-3.36238	8.7484	19.9182	8.08278e-06	0.000108977
ENSG00000054219	LY75	-3.36817	6.47711	7.16404	0.00743795	0.0306961
ENSG00000102554	KLF5	-3.3719	9.99887	38.1215	6.64729e-10	3.91636e-08
ENSG00000149150	SLC43A1	-3.37256	7.2857	24.7078	6.67123e-07	1.38978e-05
ENSG00000065621	GSTO2	-3.38017	6.12631	13.5504	0.000232245	0.00178984
ENSG00000189157	FAM47E	-3.38151	3.49399	13.1618	0.00028571	0.00213049
ENSG00000136541	ERMN	-3.40522	-1.40378	7.98468	0.00471748	0.0211427
ENSG00000167617	CDC42EP5	-3.41137	5.39258	12.3358	0.000444347	0.00307805
ENSG00000205336	ADGRG1	-3.4122	8.76317	20.7323	5.28169e-06	7.76322e-05
ENSG00000160190	SLC37A1	-3.42665	7.13577	23.6223	1.17222e-06	2.2286e-05
ENSG00000165269	AQP7	-3.42834	1.32146	7.29728	0.00690591	0.0288691
ENSG00000196407	THEM5	-3.43718	-0.043417	6.35291	0.0117189	0.0441291
ENSG00000196371	FUT4	-3.44324	7.78207	40.6496	1.8212e-10	1.25618e-08
ENSG00000166394	CYB5R2	-3.4546	4.96427	12.189	0.000480726	0.00327589
ENSG00000104870	FCGRT	-3.45471	8.45217	8.32156	0.00391773	0.018148
ENSG00000176928	GCNT4	-3.46269	4.573	9.72331	0.00181946	0.00967186
ENSG00000127152	BCL11B	-3.46525	4.65774	13.1771	0.00028339	0.00211963
ENSG00000164825	DEFB1	-3.46851	3.55991	7.7408	0.00539869	0.0236296
ENSG00000085465	OVGP1	-3.47051	3.35278	17.201	3.36254e-05	0.000357156
ENSG00000178826	TMEM139	-3.4737	6.77466	20.4547	6.10589e-06	8.69897e-05
ENSG00000102886	GDPD3	-3.48095	4.92489	15.3503	8.93069e-05	0.000813398
ENSG00000149328	GLB1L2	-3.48566	8.02816	10.053	0.001521	0.00836439
ENSG00000219435	CATSPERZ	-3.49218	2.24775	7.00727	0.00811794	0.032914
ENSG00000142235	LMTK3	-3.49929	5.04987	14.2672	0.000158603	0.00130386
ENSG00000179104	TMTC2	-3.50152	6.27607	22.1938	2.46473e-06	4.07617e-05
ENSG00000135423	GLS2	-3.51356	5.31567	15.0591	0.000104198	0.000933245
ENSG00000163235	TGFA	-3.51493	7.89696	14.2267	0.000162057	0.00132169
ENSG00000073350	LLGL2	-3.51521	9.08218	16.1479	5.85824e-05	0.000573316
ENSG00000204335	SP5	-3.52302	5.83433	9.0592	0.00261377	0.0130423
ENSG00000213462	ERV3-1	-3.5359	7.10025	12.5441	0.000397457	0.00280301
ENSG00000158055	GRHL3	-3.54035	5.59319	8.5628	0.00343101	0.0163805
ENSG00000159173	TNNI1	-3.54099	2.75553	11.222	0.000808353	0.00505199
ENSG00000250722	SELENOP	-3.55476	6.20416	7.80944	0.00519739	0.0229301
ENSG00000021300	PLEKHB1	-3.56578	5.57482	7.54218	0.0060271	0.0258939
ENSG00000128165	ADM2	-3.56794	5.88912	10.681	0.00108239	0.00640042
ENSG00000157315	TMED6	-3.5704	2.49316	10.7056	0.00106813	0.00634264
ENSG00000158813	EDA	-3.57261	5.56805	6.64729	0.00993068	0.0387632
ENSG00000116833	NR5A2	-3.57447	4.43768	7.57463	0.00591956	0.0254899
[truncated: 680 more rows]

## Sheet: 2) DE TFs-Mes VS Epi Cell Lines
GENE_ID	GENE_SYMBOL	logFC	logCPM	LR	PValue	FDR
ENSG00000169594	BNC1	12.3847	4.62885	49.0595	2.48314e-12	3.19196e-10
ENSG00000121297	TSHZ3	11.2292	3.13934	33.4278	7.39582e-09	3.169e-07
ENSG00000151702	FLI1	10.3206	4.07547	31.238	2.28253e-08	8.09404e-07
ENSG00000198963	RORB	10.2298	1.49547	40.2559	2.2278e-10	1.4824e-08
ENSG00000170549	IRX1	10.1675	1.98778	14.9048	0.000113076	0.000992329
ENSG00000204644	ZFP57	10.0868	3.94054	25.1089	5.41824e-07	1.17641e-05
ENSG00000116132	PRRX1	10.0408	3.84358	28.7483	8.24209e-08	2.39678e-06
ENSG00000176165	FOXG1	9.9545	3.91542	17.1328	3.48557e-05	0.000367463
ENSG00000178860	MSC	9.81845	4.15579	12.3775	0.000434538	0.0030212
ENSG00000106511	MEOX2	9.57204	3.98466	17.5052	2.86516e-05	0.000312543
ENSG00000103241	FOXF1	9.53244	3.55719	44.9175	2.0551e-11	2.05728e-09
ENSG00000183072	NKX2-5	9.35469	3.21076	40.5221	1.94409e-10	1.32479e-08
ENSG00000112246	SIM1	9.04696	1.05855	34.3884	4.51397e-09	2.08416e-07
ENSG00000134874	DZIP1	8.90546	5.12175	42.8183	6.00688e-11	4.81913e-09
ENSG00000164107	HAND2	8.69447	0.111399	21.0539	4.46546e-06	6.69938e-05
ENSG00000198046	ZNF667	8.58681	1.3658	23.0607	1.56966e-06	2.8095e-05
ENSG00000169554	ZEB2	8.48803	5.11582	22.4301	2.17931e-06	3.65762e-05
ENSG00000151322	NPAS3	8.34936	2.12828	27.9409	1.25079e-07	3.40118e-06
ENSG00000178919	FOXE1	8.32633	1.62782	18.8799	1.39212e-05	0.000170429
ENSG00000151789	ZNF385D	8.25042	-0.265924	17.0539	3.63333e-05	0.00038091
ENSG00000005102	MEOX1	8.20938	4.30342	15.5647	7.97273e-05	0.000738032
ENSG00000256463	SALL3	8.15753	-0.325943	19.3669	1.07858e-05	0.000138489
ENSG00000196460	RFX8	8.11279	1.60403	29.5339	5.49485e-08	1.70011e-06
ENSG00000019549	SNAI2	8.10546	6.30414	24.8009	6.35663e-07	1.33655e-05
ENSG00000196867	ZFP28	8.09531	3.34727	22.9074	1.70001e-06	2.98147e-05
ENSG00000176293	ZNF135	8.09205	0.236458	16.3637	5.22756e-05	0.000519632
ENSG00000173068	BNC2	7.89012	3.79906	51.7742	6.22636e-13	9.92009e-11
ENSG00000170370	EMX2	7.83406	-0.0779133	18.8153	1.44004e-05	0.00017385
ENSG00000184221	OLIG1	7.82412	0.111826	11.203	0.000816669	0.0050927
ENSG00000131668	BARX1	7.62837	3.99557	23.5744	1.20178e-06	2.27043e-05
ENSG00000138083	SIX3	7.58957	2.37076	18.2275	1.96029e-05	0.000224668
ENSG00000082175	PGR	7.56835	2.95753	11.9442	0.000548166	0.00366914
ENSG00000126733	DACH2	7.52281	0.802117	8.43468	0.00368132	0.0173224
ENSG00000163623	NKX6-1	7.4993	2.16277	17.7445	2.52651e-05	0.00027992
ENSG00000112837	TBX18	7.36242	3.08207	7.36773	0.00664047	0.0279765
ENSG00000233608	TWIST2	7.34969	0.516888	16.5878	4.64485e-05	0.000470038
ENSG00000196263	ZNF471	7.27911	2.50857	14.6899	0.000126725	0.00108929
ENSG00000171872	KLF17	7.23391	-0.160838	27.6697	1.43901e-07	3.8033e-06
ENSG00000214575	CPEB1	7.19661	2.0911	23.606	1.18217e-06	2.24375e-05
ENSG00000128710	HOXD10	7.083	2.82634	12.9791	0.000314992	0.00231188
ENSG00000127903	ZNF835	7.05803	-1.14184	13.5797	0.00022865	0.00176553
ENSG00000112333	NR2E1	6.98668	1.12142	7.38856	0.00656399	0.0277266
ENSG00000197928	ZNF677	6.98239	0.264221	12.7698	0.000352252	0.00253716
ENSG00000152977	ZIC1	6.95589	3.30083	6.35499	0.0117051	0.0440921
ENSG00000187140	FOXD3	6.91771	0.95345	20.0985	7.35541e-06	0.000101966
ENSG00000150051	MKX	6.89843	3.74075	19.7003	9.05858e-06	0.000120124
ENSG00000148516	ZEB1	6.8762	6.01164	43.3875	4.49043e-11	3.79072e-09
ENSG00000079263	SP140	6.8278	3.30841	28.9051	7.60135e-08	2.25686e-06
ENSG00000073861	TBX21	6.80144	-1.31101	21.7895	3.04268e-06	4.86141e-05
ENSG00000198300	PEG3	6.73315	2.43366	9.26469	0.00233614	0.0118557
ENSG00000203883	SOX18	6.71919	2.23719	16.3686	5.21415e-05	0.000519212
ENSG00000168269	FOXI1	6.60674	0.938694	11.4108	0.000730164	0.00465069
ENSG00000128713	HOXD11	6.5765	2.27178	16.1558	5.83398e-05	0.000572865
ENSG00000198914	POU3F3	6.55651	-1.46854	17.613	2.70727e-05	0.000297906
ENSG00000113430	IRX4	6.55538	0.140468	23.6463	1.15766e-06	2.21207e-05
ENSG00000131914	LIN28A	6.50679	0.912834	13.4726	0.000242078	0.00185026
ENSG00000183770	FOXL2	6.47194	3.44692	18.0697	2.12959e-05	0.000241624
ENSG00000175879	HOXD8	6.31522	2.13786	15.1687	9.83207e-05	0.000886925
ENSG00000188171	ZNF626	6.30001	3.74986	12.1087	0.000501879	0.00339752
ENSG00000144355	DLX1	6.29945	3.53912	39.7763	2.84781e-10	1.84083e-08
ENSG00000128709	HOXD9	6.11798	1.37617	9.91148	0.00164251	0.00890163
ENSG00000075891	PAX2	6.08293	1.79673	18.8224	1.43468e-05	0.000173534
ENSG00000169946	ZFPM2	6.03159	3.35885	47.1438	6.59642e-12	7.69264e-10
ENSG00000165821	SALL2	5.96487	3.24223	20.1154	7.29071e-06	0.000101318
ENSG00000170396	ZNF804A	5.95431	1.95735	6.56605	0.0103942	0.0401158
ENSG00000109705	NKX3-2	5.90456	0.991566	20.6119	5.62446e-06	8.16737e-05
ENSG00000138136	LBX1	5.84467	-0.718129	15.6339	7.68637e-05	0.000717987
ENSG00000136327	NKX2-8	5.79311	0.909814	10.4755	0.00120969	0.00698875
ENSG00000225614	ZNF469	5.78969	3.02416	28.7552	8.21297e-08	2.39446e-06
ENSG00000170577	SIX2	5.73117	2.88723	16.9025	3.93494e-05	0.00040762
ENSG00000177508	IRX3	5.68996	3.50995	22.6612	1.93227e-06	3.3118e-05
ENSG00000164900	GBX1	5.62802	-1.92936	15.9572	6.47903e-05	0.000622223
ENSG00000108001	EBF3	5.62093	0.914764	24.0657	9.31061e-07	1.84775e-05
ENSG00000163909	HEYL	5.61683	2.1613	17.6193	2.69835e-05	0.000297502
ENSG00000157554	ERG	5.58345	-0.536119	12.5666	0.000392696	0.0027781
ENSG00000106689	LHX2	5.56116	2.85127	10.9873	0.000917384	0.00560943
ENSG00000164853	UNCX	5.52774	-1.98344	10.2181	0.0013907	0.00780339
ENSG00000172733	PURG	5.51776	-0.250567	19.4765	1.01843e-05	0.000132571
ENSG00000091656	ZFHX4	5.39609	5.18501	17.4554	2.9412e-05	0.000318828
ENSG00000178403	NEUROG2	5.35459	-0.357953	12.7449	0.000356986	0.00256721
ENSG00000111249	CUX2	5.3163	0.993327	19.2005	1.17684e-05	0.000149075
ENSG00000136630	HLX	5.29502	3.00714	34.0147	5.4697e-09	2.47493e-07
ENSG00000133937	GSC	5.25707	0.37624	7.80146	0.00522042	0.0229891
ENSG00000123685	BATF3	5.24558	2.50168	35.5914	2.43359e-09	1.21272e-07
ENSG00000136352	NKX2-1	5.14429	3.29717	7.94095	0.00483285	0.0215572
ENSG00000167157	PRRX2	5.13112	2.9502	13.0992	0.000295424	0.00219137
ENSG00000184486	POU3F2	4.95672	1.17687	12.6944	0.000366754	0.0026208
ENSG00000138311	ZNF365	4.92922	2.85766	16.6427	4.51232e-05	0.000459023
ENSG00000166432	ZMAT1	4.88353	0.731292	14.0889	0.000174372	0.00140391
ENSG00000164330	EBF1	4.83104	1.7114	6.83177	0.00895505	0.0356312
ENSG00000165495	PKNOX2	4.79739	0.527027	16.6704	4.44694e-05	0.000454006
ENSG00000128573	FOXP2	4.77252	1.82296	15.5166	8.17851e-05	0.000755844
ENSG00000105419	MEIS3	4.54808	5.06986	14.0463	0.000178362	0.00142791
ENSG00000236609	ZNF853	4.54161	3.45867	17.3661	3.08274e-05	0.000331482
ENSG00000012223	LTF	4.4709	0.769142	12.5816	0.000389557	0.00276273
ENSG00000177374	HIC1	4.43448	2.8616	28.5318	9.21704e-08	2.63291e-06
ENSG00000171649	ZIK1	4.4252	1.32563	11.7704	0.000601796	0.00395367
ENSG00000128714	HOXD13	4.34393	1.31569	7.05817	0.00789047	0.0321868
ENSG00000138738	PRDM5	4.31578	2.94207	7.08516	0.00777249	0.0318099
ENSG00000177932	ZNF354C	4.29172	3.94148	10.7952	0.00101763	0.0061004
ENSG00000152454	ZNF256	4.29158	2.74195	7.83996	0.00511037	0.0226434
ENSG00000168772	CXXC4	4.29015	3.74463	8.82441	0.00297228	0.0145112
ENSG00000109101	FOXN1	4.19362	1.0177	9.98032	0.00158222	0.00864226
ENSG00000119919	NKX2-3	4.15519	-0.826128	6.26414	0.0123206	0.0458306
ENSG00000184058	TBX1	4.13467	2.69824	10.3418	0.00130052	0.00742256
ENSG00000083814	ZNF671	4.10024	1.75843	14.4401	0.000144688	0.00121328
ENSG00000134954	ETS1	3.97821	8.4738	27.676	1.43433e-07	3.79981e-06
ENSG00000198597	ZNF536	3.88494	-1.91175	7.79175	0.00524853	0.0230748
ENSG00000196724	ZNF418	3.88352	0.38384	12.2002	0.000477833	0.0032601
ENSG00000176009	ASCL3	3.87966	-2.32819	9.54556	0.00200433	0.0104822
ENSG00000113580	NR3C1	3.85394	7.45267	14.5792	0.000134388	0.00113759
ENSG00000152217	SETBP1	3.7623	3.37952	6.34116	0.0117968	0.0443339
ENSG00000185697	MYBL1	3.73014	6.96744	23.359	1.34417e-06	2.48858e-05
ENSG00000197937	ZNF347	3.7072	4.52328	7.09433	0.00773283	0.0317274
ENSG00000092607	TBX15	3.6871	2.26486	16.7916	4.17168e-05	0.000428611
ENSG00000182759	MAFA	3.66796	1.20106	14.652	0.000129294	0.00110633
ENSG00000131127	ZNF141	3.629	4.72602	11.6078	0.000656771	0.00425266
ENSG00000118526	TCF21	3.61792	3.08781	6.85121	0.00885815	0.0353326
ENSG00000118495	PLAGL1	3.48192	4.9973	6.08738	0.0136151	0.0495062
ENSG00000197576	HOXA4	3.45387	2.90895	12.8858	0.00033109	0.00241632
ENSG00000141040	ZNF287	3.29425	3.43708	7.04214	0.0079614	0.0324188
ENSG00000168779	SHOX2	3.23766	3.86309	8.17004	0.00425879	0.019457
ENSG00000178175	ZNF366	3.21944	-2.4603	11.6184	0.00065304	0.00423334
ENSG00000111087	GLI1	3.18825	3.38802	7.76303	0.00533265	0.0233847
ENSG00000069667	RORA	3.15502	4.70808	13.8535	0.000197624	0.0015633
ENSG00000124813	RUNX2	3.08863	6.3055	11.5417	0.000680513	0.00437136
ENSG00000187098	MITF	3.08231	4.8098	20.5665	5.75959e-06	8.32087e-05
ENSG00000185420	SMYD3	3.01478	7.13438	22.6805	1.91296e-06	3.2868e-05
ENSG00000223547	ZNF844	2.9782	4.96536	6.93036	0.00847446	0.0340665
ENSG00000152784	PRDM8	2.95195	2.61752	6.6179	0.0100959	0.0392862
ENSG00000126778	SIX1	2.88661	4.28516	8.66125	0.00325049	0.0156466
ENSG00000011332	DPF1	2.85657	3.68626	13.5933	0.000226997	0.00175396
ENSG00000269404	SPIB	2.83591	-0.748195	10.0275	0.00154217	0.00845205
ENSG00000205189	ZBTB10	2.80262	6.88596	6.74817	0.00938441	0.0370646
ENSG00000153814	JAZF1	2.72144	4.71197	11.1107	0.000858297	0.00532003
ENSG00000118263	KLF7	2.67957	6.15248	9.60387	0.00194168	0.0102159
ENSG00000172379	ARNT2	2.62144	4.67501	7.37409	0.00661701	0.0279193
ENSG00000175592	FOSL1	2.60671	8.5529	18.0418	2.16106e-05	0.000244704
ENSG00000092067	CEBPE	2.59642	-2.62129	6.36238	0.0116565	0.0440051
ENSG00000196628	TCF4	2.59072	4.94934	7.79654	0.00523465	0.0230316
ENSG00000173917	HOXB2	2.55382	4.84304	6.44511	0.0111258	0.0423898
ENSG00000171291	ZNF439	2.52338	3.64383	6.58213	0.0103007	0.0398502
ENSG00000115041	KCNIP3	2.52156	3.48167	7.785	0.00526819	0.0231522
ENSG00000167081	PBX3	2.44249	6.29049	21.1008	4.35741e-06	6.57213e-05
ENSG00000100625	SIX4	2.43256	6.06204	9.64961	0.00189392	0.00999254
ENSG00000140993	TIGD7	2.41323	4.16956	10.1132	0.00147208	0.00814687
ENSG00000007372	PAX6	2.24945	4.52044	8.34865	0.00385974	0.0179603
ENSG00000130751	NPAS1	2.20058	3.36813	6.83405	0.00894363	0.0355983
ENSG00000111145	ELK3	2.10195	7.16258	19.7112	9.00734e-06	0.000120013
ENSG00000010818	HIVEP2	2.08036	7.43769	16.5658	4.69915e-05	0.000474614
ENSG00000112200	ZNF451	2.02587	8.31199	14.7561	0.000122348	0.00105891
ENSG00000143067	ZNF697	2.02253	5.98662	11.6872	0.000629323	0.00410312
ENSG00000066697	MSANTD3	2.0051	6.73836	15.5705	7.94846e-05	0.000736991
ENSG00000132170	PPARG	-2.02816	8.41337	10.8887	0.000967537	0.00585282
ENSG00000197279	ZNF165	-2.05593	5.70741	11.4646	0.000709353	0.00453344
ENSG00000196812	ZSCAN16	-2.05669	4.26601	6.59395	0.0102326	0.0396654
ENSG00000132846	ZBED3	-2.11527	6.41696	11.2075	0.000814667	0.00508302
ENSG00000152926	ZNF117	-2.27126	6.75683	7.86946	0.00502768	0.0223032
ENSG00000129514	FOXA1	-2.36138	7.03739	7.12004	0.00762269	0.031367
ENSG00000123358	NR4A1	-2.37349	7.64539	7.92714	0.00486987	0.0216882
ENSG00000170345	FOS	-2.49756	10.4419	6.52845	0.0106162	0.040764
ENSG00000005073	HOXA11	-2.49795	4.94591	6.89609	0.00863847	0.0346519
ENSG00000141448	GATA6	-2.49911	8.00438	16.0534	6.15822e-05	0.000597443
ENSG00000134317	GRHL1	-2.68642	6.59017	10.2829	0.00134272	0.00760202
ENSG00000137709	POU2F3	-2.80234	3.32939	6.36849	0.0116164	0.0438895
ENSG00000125398	SOX9	-2.84698	9.10227	15.1601	9.87706e-05	0.000889564
ENSG00000189120	SP6	-2.97205	6.56638	8.30593	0.00395158	0.0182748
ENSG00000120149	MSX2	-3.09844	7.25825	11.5852	0.00066478	0.00429224
ENSG00000149922	TBX6	-3.09953	2.96542	9.69685	0.00184584	0.00978909
ENSG00000170684	ZNF296	-3.11398	4.02186	20.0008	7.74115e-06	0.000105886
ENSG00000153234	NR4A2	-3.17537	4.77383	16.8956	3.94935e-05	0.000408737
ENSG00000184828	ZBTB7C	-3.34568	5.76965	6.62349	0.0100643	0.0391765
ENSG00000102554	KLF5	-3.3719	9.99887	38.1215	6.64729e-10	3.91636e-08
ENSG00000127152	BCL11B	-3.46525	4.65774	13.1771	0.00028339	0.00211963
ENSG00000204335	SP5	-3.52302	5.83433	9.0592	0.00261377	0.0130423
ENSG00000158055	GRHL3	-3.54035	5.59319	8.5628	0.00343101	0.0163805
ENSG00000116833	NR5A2	-3.57447	4.43768	7.57463	0.00591956	0.0254899
ENSG00000108924	HLF	-3.72327	2.1642	6.76092	0.00931758	0.036892
ENSG00000163435	ELF3	-3.8847	9.99181	12.9984	0.000311754	0.00229445
ENSG00000139515	PDX1	-3.91036	5.18439	12.887	0.000330881	0.00241632
ENSG00000143365	RORC	-4.02045	2.95394	13.3721	0.000255402	0.0019338
ENSG00000136574	GATA4	-4.11675	7.1881	9.28285	0.00231309	0.0117757
ENSG00000118513	MYB	-4.27705	5.98627	22.6028	1.9919e-06	3.38832e-05
ENSG00000124440	HIF3A	-4.32765	0.855971	11.6884	0.000628896	0.00410269
ENSG00000161940	BCL6B	-4.59017	2.25619	6.28332	0.012188	0.0454718
ENSG00000121075	TBX4	-4.62706	2.61017	10.3079	0.0013246	0.00752433
ENSG00000165556	CDX2	-4.6476	7.25901	11.0624	0.000880981	0.00542934
ENSG00000129654	FOXJ1	-4.76775	5.51412	9.14649	0.00249196	0.0125313
ENSG00000140968	IRF8	-5.0701	6.54744	23.0899	1.54599e-06	2.79365e-05
ENSG00000125798	FOXA2	-5.07338	6.75472	13.5058	0.000237823	0.00182638
ENSG00000117595	IRF6	-5.11563	8.16215	27.541	1.53798e-07	4.02724e-06
ENSG00000009950	MLXIPL	-5.12063	6.85027	15.4354	8.5374e-05	0.000781352
ENSG00000135100	HNF1A	-5.15102	6.48222	47.8502	4.6005e-12	5.53626e-10
ENSG00000166268	MYRFL	-5.44509	1.89101	19.7084	9.02047e-06	0.000120047
ENSG00000125850	OVOL2	-5.48902	5.54644	26.7785	2.28162e-07	5.73549e-06
ENSG00000183734	ASCL2	-5.5051	5.38573	11.2407	0.00080025	0.00500687
ENSG00000101076	HNF4A	-5.8627	8.43196	20.3066	6.59712e-06	9.29348e-05
ENSG00000134323	MYCN	-5.93111	3.99056	10.6586	0.00109558	0.00646907
ENSG00000110777	POU2AF1	-5.99491	3.2567	10.1187	0.00146771	0.00813063
ENSG00000164379	FOXQ1	-6.04135	8.27924	31.8968	1.62581e-08	6.01018e-07
ENSG00000170608	FOXA3	-6.35402	6.01625	24.9185	5.98043e-07	1.27163e-05
ENSG00000172238	ATOH1	-6.97085	2.00879	6.5958	0.010222	0.0396403
ENSG00000156127	BATF	-7.05641	4.37087	19.8212	8.50359e-06	0.000113703
ENSG00000146285	SCML4	-7.4977	1.56893	7.71959	0.00546249	0.0238486
ENSG00000124664	SPDEF	-7.96685	5.38063	26.1906	3.09328e-07	7.41443e-06
ENSG00000144852	NR1I2	-8.60846	5.33116	15.957	6.47966e-05	0.000622223
ENSG00000135373	EHF	-9.13586	8.71351	67.3297	2.29696e-16	8.66106e-14
ENSG00000172818	OVOL1	-9.44646	6.60449	90.5299	1.822e-21	1.79147e-18
ENSG00000083307	GRHL2	-9.80859	7.78003	145.791	1.44193e-33	8.15556e-30
ENSG00000175329	ISX	-10.0297	3.66405	18.5954	1.61614e-05	0.000191577
ENSG00000113722	CDX1	-11.9733	6.3901	14.1263	0.000170937	0.00138021
