# Supplementary material for: Machine learning identifies activation of RUNX/AP-1 as drivers of mesenchymal and fibrotic regulatory programs in gastric cancer
Source: HighWire-hosted journal article supplement (doi:10.1101/gr.278565.123), 2024-05-01
Supplement: Supplemental_Table_S2.xlsx [file Supplemental_Table_S2.xlsx]

## Sheet: 1) Top Enriched Gene Sets - Mes
MSigDB Gene Set	Overlap	Mes DEG	Gene Set Size	Hypergeom pval	FDR
LIU_OVARIAN_CANCER_TUMORS_AND_XENOGRAFTS_XDGS_DN	334	920	1715	2.48312e-224	5.55995e-220
CHARAFE_BREAST_CANCER_LUMINAL_VS_MESENCHYMAL_DN	130	920	465	9.81243e-104	1.09855e-99
LIM_MAMMARY_STEM_CELL_UP	120	920	480	2.65706e-89	1.98314e-85
SCHUETZ_BREAST_CANCER_DUCTAL_INVASIVE_UP	102	920	352	6.75272e-83	3.78e-79
NABA_MATRISOME	144	920	1026	2.58978e-71	1.15976e-67
ONDER_CDH1_TARGETS_2_UP	82	920	257	1.77289e-70	6.61613e-67
CHICAS_RB1_TARGETS_CONFLUENT	104	920	566	6.11627e-63	1.95642e-59
GOBP_CELL_ADHESION	162	920	1541	4.12009e-62	1.15316e-58
LINDGREN_BLADDER_CANCER_CLUSTER_2B	88	920	389	2.49398e-61	6.20475e-58
BOQUEST_STEM_CELL_UP	73	920	262	5.37962e-58	1.20455e-54
HALLMARK_EPITHELIAL_MESENCHYMAL_TRANSITION	65	920	200	1.42218e-56	2.89491e-53
GOBP_CELL_MOTILITY	166	920	1794	7.95125e-56	1.48364e-52
CHARAFE_BREAST_CANCER_LUMINAL_VS_BASAL_DN	88	920	456	4.04321e-55	6.96396e-52
VECCHI_GASTRIC_CANCER_ADVANCED_VS_EARLY_UP	61	920	177	6.23451e-55	9.97121e-52
FOROUTAN_TGFB_EMT_UP	61	920	192	1.84961e-52	2.76097e-49

## Sheet: 2) Top Enriched Gene Sets - Epi
MSigDB Gene Set	Overlap	Epi DEG	Gene Set Size	Hypergeom pval	FDR
CHARAFE_BREAST_CANCER_LUMINAL_VS_MESENCHYMAL_UP	151	850	455	4.4837e-139	1.00395e-134
COLDREN_GEFITINIB_RESISTANCE_DN	101	850	230	3.33134e-107	3.7296e-103
DODD_NASOPHARYNGEAL_CARCINOMA_UP	204	850	1815	2.80432e-91	2.09305e-87
ONDER_CDH1_TARGETS_2_DN	117	850	473	1.67218e-90	9.36045e-87
HOLLERN_EMT_BREAST_TUMOR_DN	68	850	123	3.02993e-81	1.35686e-77
LIM_MAMMARY_STEM_CELL_DN	97	850	416	3.16033e-72	1.17938e-68
CHARAFE_BREAST_CANCER_BASAL_VS_MESENCHYMAL_UP	60	850	126	1.78408e-66	5.70676e-63
ANDERSEN_CHOLANGIOCARCINOMA_CLASS2	65	850	175	3.35076e-63	9.37836e-60
VECCHI_GASTRIC_CANCER_ADVANCED_VS_EARLY_DN	61	850	147	6.29897e-63	1.56711e-59
SMID_BREAST_CANCER_BASAL_DN	102	850	700	4.67747e-55	1.04733e-51
WAMUNYOKOLI_OVARIAN_CANCER_LMP_UP	68	850	270	4.00571e-53	8.1538e-50
CREIGHTON_ENDOCRINE_THERAPY_RESISTANCE_3	101	850	727	1.56995e-52	2.9294e-49
MEBARKI_HCC_PROGENITOR_FZD8CRD_DN	81	850	459	2.8386e-50	4.88916e-47
SCHAEFFER_PROSTATE_DEVELOPMENT_48HR_UP	80	850	449	5.47159e-50	8.75103e-47
JAEGER_METASTASIS_DN	64	850	259	1.78713e-49	2.66771e-46

## Sheet: Legends
MSigDB gene set enrichment analysis using default GSEA parameters.
Gene sets: H, C2, C5, C6
1) Top Enriched Gene Sets - Mes
Genes enriched in Mes-like GC cell lines
2) Top Enriched Gene Sets - Epi
Genes enriched in Epi-like GC cell lines
