# Supplementary material for: Machine learning identifies activation of RUNX/AP-1 as drivers of mesenchymal and fibrotic regulatory programs in gastric cancer
Source: HighWire-hosted journal article supplement (doi:10.1101/gr.278565.123), 2024-05-01
Supplement: Supplemental_Table_S2.xlsx [file Supplemental_Table_S2.xlsx]

## Sheet: 1) Top Enriched Gene Sets - Mes
MSigDB Gene Set	Overlap	Mes DEG	Gene Set Size	Hypergeom pval	FDR
LIU_OVARIAN_CANCER_TUMORS_AND_XENOGRAFTS_XDGS_DN	505	1703	1715	1.31067e-299	2.93472e-295
LIM_MAMMARY_STEM_CELL_UP	192	1703	480	1.58887e-136	1.77882e-132
BENPORATH_ES_WITH_H3K27ME3	268	1703	1115	4.58114e-128	3.41921e-124
BENPORATH_SUZ12_TARGETS	246	1703	1035	5.73629e-116	3.21103e-112
CHARAFE_BREAST_CANCER_LUMINAL_VS_MESENCHYMAL_DN	163	1703	465	6.5997e-105	2.95548e-101
MEISSNER_BRAIN_HCP_WITH_H3K4ME3_AND_H3K27ME3	237	1703	1074	3.84084e-104	1.43334e-100
NABA_MATRISOME	227	1703	1026	7.49134e-100	2.39627e-96
GOBP_NEUROGENESIS	286	1703	1669	1.22844e-97	3.43825e-94
BENPORATH_EED_TARGETS	227	1703	1059	7.18062e-97	1.78646e-93
SCHUETZ_BREAST_CANCER_DUCTAL_INVASIVE_UP	138	1703	352	2.21032e-96	4.94913e-93
GOCC_INTRINSIC_COMPONENT_OF_PLASMA_MEMBRANE	294	1703	1795	1.82063e-95	3.70598e-92
GOBP_GENERATION_OF_NEURONS	262	1703	1453	3.37487e-94	6.29723e-91
GOBP_CELL_ADHESION	260	1703	1541	8.5403e-87	1.47097e-83
GOCC_SYNAPSE	237	1703	1342	6.01062e-83	9.61313e-80
GOCC_EXTERNAL_ENCAPSULATING_STRUCTURE	154	1703	575	7.41863e-80	1.1074e-76
GOBP_CELL_MOTILITY	268	1703	1794	1.78076e-77	2.49206e-74
GOCC_NEURON_PROJECTION	231	1703	1378	3.51229e-76	4.6261e-73
ONDER_CDH1_TARGETS_2_UP	105	1703	257	1.37482e-75	1.7102e-72
GOCC_ANCHORING_JUNCTION	225	1703	1333	1.01177e-74	1.19234e-71
MIKKELSEN_MCV6_HCP_WITH_H3K27ME3	129	1703	438	2.31173e-72	2.5881e-69
GOBP_ANIMAL_ORGAN_MORPHOGENESIS	195	1703	1058	4.34984e-71	4.63797e-68
GOBP_NEURON_DEVELOPMENT	200	1703	1113	5.54717e-71	5.64576e-68
GOBP_TISSUE_DEVELOPMENT	274	1703	1998	5.9385e-71	5.78126e-68
BENPORATH_PRC2_TARGETS	153	1703	650	8.63979e-71	8.06056e-68
GOBP_CELL_CELL_SIGNALING	247	1703	1679	9.04028e-70	8.09684e-67
CHICAS_RB1_TARGETS_CONFLUENT	142	1703	566	1.4961e-69	1.28843e-66
GOBP_CELL_PROJECTION_ORGANIZATION	237	1703	1576	1.03763e-68	8.60503e-66
VECCHI_GASTRIC_CANCER_ADVANCED_VS_EARLY_UP	85	1703	177	1.1804e-68	9.43941e-66
BOQUEST_STEM_CELL_UP	100	1703	262	1.45627e-68	1.12439e-65
GOBP_CELL_MORPHOGENESIS	187	1703	1019	8.41157e-68	6.0756e-65
LINDGREN_BLADDER_CANCER_CLUSTER_2B	118	1703	389	8.30003e-68	6.0756e-65
HALLMARK_EPITHELIAL_MESENCHYMAL_TRANSITION	87	1703	200	1.34263e-65	9.39463e-63
GOBP_ANATOMICAL_STRUCTURE_FORMATION_INVOLVED_IN_MORPHOGENESIS	203	1703	1244	1.19427e-64	8.1033e-62
LIU_PROSTATE_CANCER_DN	128	1703	493	1.3273e-64	8.74105e-62
GOBP_LOCOMOTION	220	1703	1446	1.51073e-64	9.66479e-62
GOBP_TUBE_DEVELOPMENT	195	1703	1155	1.56866e-64	9.75663e-62
GOBP_CIRCULATORY_SYSTEM_DEVELOPMENT	198	1703	1211	3.64304e-63	2.20463e-60
GOCC_COLLAGEN_CONTAINING_EXTRACELLULAR_MATRIX	119	1703	434	6.09513e-63	3.59148e-60
SMID_BREAST_CANCER_NORMAL_LIKE_UP	124	1703	484	7.13571e-62	4.09681e-59
GOBP_CELLULAR_COMPONENT_MORPHOGENESIS	153	1703	768	2.67431e-60	1.49701e-57
FOROUTAN_TGFB_EMT_UP	81	1703	192	7.75557e-60	4.23549e-57
GOBP_REGULATION_OF_CELL_DIFFERENTIATION	226	1703	1641	2.26959e-58	1.20996e-55
NABA_CORE_MATRISOME	93	1703	275	2.57592e-58	1.34134e-55
MIKKELSEN_MEF_HCP_WITH_H3K27ME3	132	1703	591	3.67755e-58	1.87146e-55
GOBP_TUBE_MORPHOGENESIS	166	1703	944	2.27868e-57	1.13382e-54
GOCC_SOMATODENDRITIC_COMPARTMENT	156	1703	849	1.58516e-56	7.71594e-54
WONG_ADULT_TISSUE_STEM_MODULE	143	1703	722	5.1029e-56	2.43104e-53
GOBP_CELL_MORPHOGENESIS_INVOLVED_IN_DIFFERENTIATION	142	1703	724	4.47642e-55	2.08816e-52
MEISSNER_NPC_HCP_WITH_H3K4ME2_AND_H3K27ME3	100	1703	350	7.9228e-55	3.6204e-52
GOCC_PLASMA_MEMBRANE_REGION	189	1703	1251	8.93805e-55	4.00264e-52

## Sheet: 2) Top Enriched Gene Sets - Epi
MSigDB Gene Set	Overlap	Epi DEG	Gene Set Size	Hypergeom pval	FDR
CHARAFE_BREAST_CANCER_LUMINAL_VS_MESENCHYMAL_UP	159	976	455	9.01381e-141	2.01828e-136
ONDER_CDH1_TARGETS_2_DN	134	976	473	2.4221e-104	2.71166e-100
COLDREN_GEFITINIB_RESISTANCE_DN	103	976	230	4.45037e-104	3.32161e-100
DODD_NASOPHARYNGEAL_CARCINOMA_UP	227	976	1815	7.81116e-99	4.37249e-95
HOLLERN_EMT_BREAST_TUMOR_DN	71	976	123	2.3762e-82	1.06411e-78
LIM_MAMMARY_STEM_CELL_DN	100	976	416	5.93957e-70	2.21655e-66
CHARAFE_BREAST_CANCER_BASAL_VS_MESENCHYMAL_UP	63	976	126	1.06235e-67	3.39815e-64
ANDERSEN_CHOLANGIOCARCINOMA_CLASS2	69	976	175	4.7459e-65	1.32832e-61
VECCHI_GASTRIC_CANCER_ADVANCED_VS_EARLY_DN	64	976	147	8.69535e-64	2.16331e-60
MEBARKI_HCC_PROGENITOR_FZD8CRD_DN	96	976	459	3.78648e-61	8.47831e-58
CREIGHTON_ENDOCRINE_THERAPY_RESISTANCE_3	111	976	727	7.30051e-56	1.48605e-52
SMID_BREAST_CANCER_BASAL_DN	108	976	700	8.29909e-55	1.54854e-51
JAEGER_METASTASIS_DN	71	976	259	4.27485e-54	7.36294e-51
YOSHIMURA_MAPK8_TARGETS_UP	141	976	1276	3.112e-53	4.9772e-50
WAMUNYOKOLI_OVARIAN_CANCER_LMP_UP	71	976	270	1.03614e-52	1.54668e-49
SCHAEFFER_PROSTATE_DEVELOPMENT_48HR_UP	87	976	449	1.58423e-52	2.21703e-49
GOBP_LIPID_METABOLIC_PROCESS	147	976	1415	3.63084e-52	4.78224e-49
FEVR_CTNNB1_TARGETS_UP	104	976	688	6.71076e-52	8.34781e-49
GOBP_SMALL_MOLECULE_METABOLIC_PROCESS	163	976	1848	2.15956e-48	2.54498e-45
CARRILLOREIXACH_HEPATOBLASTOMA_VS_NORMAL_DN	131	976	1258	1.77366e-46	1.9857e-43
SABATES_COLORECTAL_ADENOMA_UP	49	976	140	1.80629e-43	1.92594e-40
HSIAO_LIVER_SPECIFIC_GENES	61	976	249	2.05527e-43	2.0918e-40
GOCC_PLASMA_MEMBRANE_REGION	123	976	1251	5.12818e-41	4.99239e-38
GOBP_CELLULAR_LIPID_METABOLIC_PROCESS	110	976	1014	1.24344e-40	1.16008e-37
GOCC_APICAL_PART_OF_CELL	74	976	437	1.61224e-40	1.44399e-37
GOBP_TISSUE_DEVELOPMENT	154	976	1998	1.62519e-38	1.34776e-35
SENGUPTA_NASOPHARYNGEAL_CARCINOMA_DN	66	976	359	1.59728e-38	1.34776e-35
FOROUTAN_TGFB_EMT_DN	41	976	108	2.85654e-38	2.28431e-35
MCBRYAN_PUBERTAL_BREAST_4_5WK_UP	58	976	270	6.71718e-38	5.18636e-35
GOCC_INTRINSIC_COMPONENT_OF_PLASMA_MEMBRANE	144	976	1795	7.08933e-38	5.29124e-35
LEE_BMP2_TARGETS_UP	93	976	778	8.63128e-38	6.23429e-35
GOCC_APICAL_PLASMA_MEMBRANE	66	976	370	1.12194e-37	7.85042e-35
MEISSNER_BRAIN_HCP_WITH_H3K4ME3_AND_H3K27ME3	109	976	1074	1.38962e-37	9.42878e-35
FOROUTAN_INTEGRATED_TGFB_EMT_DN	35	976	74	5.36735e-37	3.53472e-34
WAMUNYOKOLI_OVARIAN_CANCER_GRADES_1_2_UP	44	976	140	8.30273e-37	5.31161e-34
GOBP_HOMEOSTATIC_PROCESS	138	976	1708	1.35017e-36	8.39768e-34
LEF1_UP.V1_DN	48	976	187	1.98679e-35	1.20233e-32
MARTENS_TRETINOIN_RESPONSE_UP	93	976	855	1.76895e-34	1.04233e-31
GOBP_EPITHELIUM_DEVELOPMENT	111	976	1211	3.24072e-34	1.86059e-31
GOBP_ORGANIC_ACID_METABOLIC_PROCESS	98	976	966	8.4988e-34	4.75742e-31
GOZGIT_ESR1_TARGETS_DN	88	976	784	1.09796e-33	5.9962e-31
BLANCO_MELO_BETA_INTERFERON_TREATED_BRONCHIAL_EPITHELIAL_CELLS_DN	49	976	215	1.73321e-33	9.24007e-31
GOBP_CELL_ADHESION	125	976	1541	2.84605e-33	1.482e-30
LIEN_BREAST_CARCINOMA_METAPLASTIC_VS_DUCTAL_DN	38	976	115	6.75084e-33	3.43541e-30
CHARAFE_BREAST_CANCER_LUMINAL_VS_BASAL_UP	62	976	386	9.77526e-33	4.86395e-30
BLANCO_MELO_RESPIRATORY_SYNCYTIAL_VIRUS_INFECTION_A594_CELLS_DN	38	976	119	2.9439e-32	1.43298e-29
GOBP_ORGANIC_HYDROXY_COMPOUND_METABOLIC_PROCESS	72	976	555	1.09558e-31	5.21939e-29
SERVITJA_ISLET_HNF1A_TARGETS_DN	36	976	110	4.59998e-31	2.14579e-28
CHEMNITZ_RESPONSE_TO_PROSTAGLANDIN_E2_DN	61	976	408	1.94061e-30	8.8678e-28
CAIRO_LIVER_DEVELOPMENT_DN	46	976	225	2.66743e-29	1.19453e-26
