# Supplementary material for: Machine learning identifies activation of RUNX/AP-1 as drivers of mesenchymal and fibrotic regulatory programs in gastric cancer
Source: HighWire-hosted journal article supplement (doi:10.1101/gr.278565.123), 2024-05-01
Supplement: Supplemental_Table_S3.xlsx [file Supplemental_Table_S3.xlsx]

## Sheet: IntOGen-DriverGenes_STAD_top10
Symbol	Mutations	Samples	Samples (%)
TP53	183	162	37.16
ARID1A	52	47	10.78
PIK3CA	50	43	9.86
APC	32	31	7.11
CDH1	34	29	6.65
SMAD4	25	27	6.19
KMT2D	31	26	5.96
KRAS	25	25	5.73
CDH11	25	24	5.5
ERBB3	21	21	4.82

## Sheet: Legends
Top 10 frequently mutated driver genes in stomach adenocarcinoma
Data obtained from IntOgen online portal.
