# Supplementary material for: Machine learning identifies activation of RUNX/AP-1 as drivers of mesenchymal and fibrotic regulatory programs in gastric cancer
Source: HighWire-hosted journal article supplement (doi:10.1101/gr.278565.123), 2024-05-01
Supplement: Supplemental_Table_S4.xlsx [file Supplemental_Table_S4.xlsx]

## Sheet: Cluster 1 - Immune
HLA-DRA
HLA-DPB1
MS4A1
CD83
HLA-DQB1
HLA-DRB1
HLA-DPA1
CD74
HLA-DQA1
VPREB3
S100A9
CXCR4
HLA-DRB5
IL1B
TYROBP
FCER1G
BCL2A1
CD37
IRF8
GPR183
BANK1
AIF1
CD79B
LAPTM5
HLA-DMB
HLA-DMA
LY86
HLA-DQA2
LTB
TCL1A
CD52
MYC
REL
CD53
FCRLA
CD14
LST1
PHACTR1
SPIB
CD69
CD22
CD19
LIMD2
SELL
CORO1A
LY9
MS4A6A
CTSS
NFKBID
PMAIP1
MEF2C
CLECL1
NR4A2
POU2F2
SWAP70
FCER2
ARHGAP24
BASP1
UCP2
NCF1
RASGEF1B
ZNF331
CCR7
LCP1
HVCN1
LAT2
RNASE6
SP110
EZR
TNFRSF13B
NR4A1
SPI1
SERPINB9
GPSM3
PLAC8
BCL11A
CD48
MS4A7
ADAM28
LDLRAD4
PLEK
CD68
CD40
KYNU
MNDA
ACP5
STK4
CD86
CYBB
LITAF
PTPN6
BLK
DCK
BCAS4
GAPT
SKAP2
RGS19
COTL1
CD1C
CD72
SNX10
PRKCB
CYB561A3
TNFAIP8
RHOH
TLR10
CYTIP
STX7
RILPL2
C1orf162
ORAI2
LYN
GPR18
PLEKHF2
MAP3K8
SCIMP
ARHGDIB
RASGRP2
CHI3L2
IFI30
GCA
EVI2B
PIK3AP1
LSP1
ELF1
ARPC1B
BTK
HLA-DOB
SKIL
G0S2
CCL3
RALGPS2
ITGB2
RCSD1
METTL8
CNN2
SP140
RNASET2
ANKRD44
PLAUR
SNAP23
AP1S2
BLNK
TMEM156
ARL4A
C15orf48
CD55
TAGAP
FCGR2B
CAPG
SGK1
ZCCHC7
BIRC3
FCRL2
TMEM243
CTSH
TYMP
HBB
CXCL2
CD44
PLIN2
CCL20
IER3

## Sheet: Cluster 2 - Stomach
PHGR1
REG4
TFF3
PLVAP
PCSK1N
MDK
CLDN4
RAMP2
LGALS4
FABP5
KRT8
KRT19
TM4SF1
TSPAN8
EPCAM
SPARCL1
SLC9A3R2
IGFBP7
CRIP2
CLDN3
KRT18
MGP
RAMP3
S100A10
GNG11
TM4SF4
CLDN5
ID1
SOX4
A2M
HSPG2
CLDN7
ALDH1A1
COL15A1
PRSS23
MT1G
VWF
S100A16
S100A14
ANXA2
EGFL7
ELF3
ADIRF
RNASE1
FXYD3
HEPACAM2
MS4A8
NPDC1
CLEC14A
TGFBR2
CAV1
EPAS1
AQP1
MALL
HYAL2
C19orf33
PERP
SERPINB6
KCTD12
ECSCR
EMCN
HES1
SMIM22
WFDC2
PRSS3
CD93
MGST2
PODXL
MUC13
NFIB
KRT7
ATP1B1
C12orf75
FAM167B
SFN
MT1E
HEG1
AGR3
AZGP1
BCAM
CNN3
SLCO2A1
TM4SF5
ITGA6
ESAM
TSC22D1
PHLDA2
SPINT2
EMP1
STMN1
AGPAT2
ARHGAP29
IGFBP2
JAM2
TSPAN7
PDLIM1
EMP2
MISP
NQO1
FCGRT
TPM1
EFNA1
ANXA4
KLF5
DSP
CDH17
SPATS2L
PPIC
CAMK2N1
MGLL
EPHX1
ASPH
CARHSP1
JUP
CISD1
TNFRSF1A
SERINC2
SPINT1
MYO6
GNAQ
OCIAD2
C15orf48
PON2
CLDN15
PDLIM5
VIL1
USH1C
TMEM176B
NCKAP1
ASS1
TMEM176A
TMEM88
VWA1
NCOA7
TNFSF10
RAB25
SCG5
CYYR1
LIMA1
SERPINA1
SYNPO
PLS1
CALCRL
SORBS2
TMEM45B
RBP1
MAL2
ETHE1
TMEM54
PRAP1
TSPAN13
LIMCH1
LDB2
CDH1
GPRC5A
TIMP3
PTPRB
TINAGL1
CDHR5
PCDH17
STAP2
COL4A1
SDCBP2
MTUS1
MMRN2
CPE
TJP1
DSG2
TP53I3
CAV2
CDH5
TM4SF18
SERPINB1
CD34
GNG12
PLSCR1
SCGN
AOC1
RBP7
BMPR2
KDR
CXADR
FLT1
SEZ6L2
LMO7
TSPAN1
ACVRL1
SOX18
COL4A2
AKR1C3
HTATIP2
TNFRSF12A
NOSTRIN
ARL14
AKR7A3
MGST1
SCOC
KLF4
KLF3
ITGB4
CHGA
EFNB2
ANXA13
STARD10
TUBB2A
SPINK1
DST
FABP1
MAP3K13
MAP1LC3A
CRIM1
GTF2I
S100P
CYP3A5
TUBA1C
APLNR
SERPINH1
LIPH
YBX3
FABP2
MYH14
LPAR6
ERBB3
CXCL12
NOTCH4
ANPEP
GPX2
MAGI1
FHL2
C1orf54
CTNNAL1
DSC2
CCND1
MYCT1
PFN2
IL3RA
WWTR1
NRP1
S1PR1
HTRA1
ENPP2
PBX1
AGR2
ST14
CRYBA2
SLC22A18
TM4SF20
RBM47
SCG3
PLS3
TMEM204
TMC5
UPP1
MAST4
GIMAP7
GCNT3
MYO15B
CFI
PIK3R3
LUZP1
ACSL5
C4orf48
TTR
SMIM6
ALDOB
GPR160
INSM1
SNCG
HSD17B2
MAP1B
NFIA
KRT20
TIE1
COX7A1
CEACAM6
SLC44A4
ADCY4
TEK
ROBO4
LIMS2
ECE1
MPZL2
ERRFI1
FAM3B
PTPRG
EDN1
NR0B2
LIFR
CD36
RBP5
PLAC8
NNMT
EHD4
TRIM31
PMP22
PIGR
CHGB
RBP4
OLFM4
DMBT1
LAMB3
MUC17
TCF4
GIMAP4
THBD
ELK3
SI
KLK11
NES
GSTA1
PCK1
APOA1
CLIC2
PKIB
HES6
AKR1B10
SPINK4
C2CD4B
CEACAM5
TACSTD2
CDHR2
CDKN1C
TPPP3
PRCP
MAOB
CLU
MT1H
CD55
GDF15
RBP2
MT1F
SLPI
IGFBP3
ANXA10
PI3
GHRL
HPGD
ATF3
PSCA
HOPX
FCGBP
REG1A
RGCC

## Sheet: Cluster 3 - Immune
CCL5
KLRB1
CD3D
CCL4
GZMA
IL32
CD7
NKG7
CD2
CD3E
GNLY
GZMB
S100A4
XCL2
CST7
HCST
ICOS
LCK
ANXA1
CD3G
CREM
IL7R
ALOX5AP
TNFAIP3
RORA
GZMK
LAG3
LAT
TIGIT
PTPRC
SPOCK2
SAMSN1
CD52
ARHGDIB
CLEC2B
PRF1
CD247
CORO1A
BATF
CKLF
CD96
CD8A
ITM2A
FYN
GPR171
LTB
GZMM
GPR65
PHLDA1
GZMH
ARL4C
CD69
RAC2
STK17B
CCL20
DUSP4
ACAP1
IL2RG
GIMAP7
GIMAP4
ABRACL
NR4A2
CXCR6
ELF1
SLA
KLRD1
PTPN7
SH2D2A
SPRY1
TRAT1
PTGER4
GMFG
DOK2
TBC1D10C
SIRPG
TNFRSF4
IL2RB
CD8B
TNFRSF18
LAPTM5
CD6
RUNX3
PRKCH
AAK1
EVI2A
ARPC1B
PPP1R18
CTSW
SKAP1
GIMAP5
MAF
ZAP70
MGAT4A
WIPF1
CELF2
RGS10
COTL1
SH2D1A
TMIGD2
SYTL3
CLEC2D
SIT1
BIRC3
CD40LG
PTPN22
TNFRSF1B
ZNF331
FXYD5
GPSM3
RHOH
GNG2
REL
UCP2
ABI3
ICA1
GBP2
RNF213
STAT4
BCL11B
LCP1
TNFRSF25
AKAP13
CNOT6L
PYHIN1
RGL4
RASSF5
NR3C1
RAP1A
TRAF3IP3
LIMD2
RGS1
LCP2
HOPX
RHOF
RAP1B
CD28
GRAP2
GATA3
BIN2
SPN
SH3KBP1
CARD16
LIMS1
CXCR4
DENND2D
TNFAIP8
CCND3
RAB27A
STK4
TTC39C
CD53
CCND2
APOBEC3G
LSP1
ITGB2
LDLRAD4
ETS1
ODF2L
ZC3HAV1
IFI16
PDE4D
OXNAD1
ARID5A
GALM
LPXN
CD48
LBH
RASAL3
CTSC
MYO1F
RILPL2
CYTIP
GIMAP2
ARHGAP9
APBB1IP
ARHGAP30
CCR6
CMTM3
RAB8B
FMNL1
AKNA
SH3BP1
TCF7
GPR183
DUSP2
GABARAPL1
SASH3
APOBEC3C
MYO1G
IKZF1
TIPARP
ARHGAP15
BTG3
MAP3K8
SLC38A1
DEF6
LYST
FAM118A
NDFIP2
EMB
CD44
BAZ1A
HCLS1
MBP
C1orf56
LRRFIP1
PSMB9
RGCC
PCSK7
CNN2
FOSL2
CAPG
RPS4Y1
TAGAP
FOXP1
CMC2
YAF2
GLIPR1
SIGIRR
GYPC
CMC1
CCL3

## Sheet: Cluster 4 - Immune
MZB1
DERL3
FKBP11
TNFRSF17
CD79A
JSRP1
PIM2
ANKRD28
CYBA
TRIB1
LY96
SPAG4
EAF2
FCRL5
TMEM107
DUSP5
SDC1
PRDM1
ISG20
CD27
CCR10
SPINK2
RGS1
POU2AF1
FOSB
HSPA6
SLAMF7
TPD52
TOR3A
CD38
MEI1
GNG7
NUCB2
PDK1
RAB30
CDKN1A
IFNAR2
ICAM2
ZBP1
FOS
TPST2
GADD45A
ZBTB38
SIL1
GLRX
DNAJC1
CXorf21
CISD2
A1BG
ICAM3
SPATS2
TAPBPL
GLCCI1
HSPA13
CREB3L2
TIFA
PAIP2B
PNOC
KCNN3
NANS
SIK1
MANEA
QPRT

## Sheet: Cluster 5 - Stomach
PGC
REG3A
LIPF
LYZ
TFF2
TFF1
LTF
BPIFB1
REG1A
SPINK1
LCN2
AGR2
GKN1
MUC6
MSMB
GKN2
PIGR
S100P
CXCL17
C6orf58
ZG16B
MUC5AC
FXYD3
CLDN18
MUC1
GPX2
KRT19
KRT18
CA2
ANXA10
OLFM4
SMIM22
CTSE
KRT8
TSPAN8
FAM3D
NQO1
PRR4
PSCA
RNASE1
MT1G
ELF3
AKR1B10
C19orf33
VSIG2
SLPI
AQP5
CLU
TESC
IGFBP2
MIA
AKR1C3
ATP1B1
ALDH3A1
PDZK1IP1
TSPAN1
WFDC2
STARD10
MT1E
MGST1
ID1
CXCL3
EPCAM
MGST2
PRSS3
GMDS
SLC12A2
ANXA4
ALDH1A1
SPINT2
FAM3B
CXCL2
TACSTD2
TMC5
AGR3
FCGBP
MAL2
TCN1
SLC44A4
S100A16
S100A14
ANXA2
KCNE2
SOX9
SERPINA1
SFN
AKR7A3
SULT1C2
FOXQ1
LGALS4
NPDC1
CDC42EP5
TMEM54
VSIG1
BACE2
GALE
C16orf89
GDF15
SERPINB1
CDC42EP1
GPRC5A
RAB25
IER3
TFF3
ANXA3
PDIA2
PRSS8
LSR
CXADR
GSTM3
RBM47
CA9
LIPH
SELENBP1
S100A10
AZGP1
SLC40A1
TMEM97
PERP
MLPH
FHL2
TUBA1C
ANG
TMPRSS2
GSTA1
KCNE3
GALNT3
CDH1
AP1M2
CAPN8
TSPAN13
SDCBP2
FMOD
TMEM98
C12orf75
KLF5
KLF4
KRTCAP3
CCND1
MECOM
TMED3
PI3
FUT2
ATP8B1
PHLDA2
OCIAD2
GATA6
LIMA1
ANKRD22
PPIC
TCEA3
HES1
GALNT7
FBP1
SH3BGRL2
GATM
GP2
COMTD1
MPST
HEBP2
DEGS2
SPDEF
TPM1
SERINC2
CREB3L1
SUCLG2
LAD1
BCAS1
FOXA3
UGDH
C9orf152
SERPINB6
ABCC3
ASPH
ST6GALNAC1
MT1M
TRNP1
DHCR24
SH3YL1
LGALS9
ERBB3
GPRC5C
PKP3
AADAC
FUT9
RAB27B
SPINT1
ENAH
NUDT8
STEAP1
DSP
PLLP
RPS27L
DSG2
IMPA2
EFNA1
CYP3A5
C6orf132
BCL2L15
PPP1R1B
DDAH1
TK1
JUP
SPATS2L
ERN2
ABLIM1
SMAGP
FERMT1
LAMB3
HMGA1
DUOX2
MMP1
CKMT1B
TM4SF1
RASSF7
CENPV
KDELR3
PTGR1
ST14
PRR15L
ORM2
SCNN1A
CERS6
SORD
SLC35A3
ASL
CEBPD
IQGAP2
GALNT6
GSTO2
SMIM6
NR2F6
CYP2S1
NANS
FAR1
CRB3
ITGB4
MUC5B
CDCA7
MMP7
PGA3

## Sheet: Cluster 6 - Fibroblast
LUM
CXCL14
RGS5
ACTA2
CALD1
COL3A1
DCN
COL1A2
CCL11
IGFBP7
COL1A1
RARRES2
PTGDS
POSTN
ADIRF
CFD
C1S
COL6A2
IGFBP5
C1R
APOD
SOD3
NDUFA4L2
MFAP4
FRZB
APOE
MGP
SPARCL1
SERPING1
TPM1
MFGE8
SERPINF1
CCL2
COL6A1
TMEM176B
FBLN1
MMP2
A2M
CAV1
COL6A3
PLAC9
PPP1R14A
THY1
MYLK
TFPI
FN1
GPX3
TMEM176A
CSRP2
PCOLCE
SDC2
MYH11
COX7A1
BGN
CFH
PTN
CNN3
COL4A1
COL18A1
PDGFRA
COL5A2
NNMT
NUPR1
COL4A2
ASPN
SPON2
IGFBP6
FSTL1
PLAT
CTSC
VCAN
FHL1
AEBP1
LTBP4
CTSK
COX4I2
NOTCH3
MAP1B
ABCA8
TIMP3
EMILIN1
NR2F2
RBP1
BMP4
F3
PDGFRB
CRIP2
TIMP2
NID1
TSC22D1
LAMA4
CCDC80
TM4SF1
FILIP1L
AXL
TPPP3
C11orf96
LAMC1
CAV2
TGFB1I1
COL5A1
EHD2
PMP22
SERPINH1
PRSS23
PDLIM1
LPP
FXYD1
NEXN
EDIL3
GGT5
LTBP1
CLEC11A
CYGB
TCF21
SYNPO2
CRISPLD2
TCF4
PALLD
NFIA
NBL1
VCAM1
PDLIM7
PLAU
ECM1
GNG11
CRYAB
PDPN
EDNRB
F2R
TSPAN4
CYBRD1
WFDC1
RCAN2
OLFML3
SGCE
LOXL2
SPRY1
EPHX1
RBPMS
TGFBI
PDLIM3
PLS3
DKK3
EPS8
EPAS1
PROCR
EPB41L2
LAMB2
COL12A1
PLOD2
EMP2
YBX3
PHLDA1
SNAI2
PCDH18
S100A4
SOX4
DDR2
FBN1
PPIC
CDH11
KANK2
MXRA8
ANTXR1
NDN
DST
FERMT2
FKBP10
BST2
ZEB2
TNFRSF1A
SERPINB6
ANXA2
TBX2
C2
RCN1
ITGAV
PGF
ITGA1
AKAP12
DPT
MCAM
TMEM47
MSRB3
NR2F1
TUSC3
PDE5A
PXDN
ACTG2
CTSL
FXYD6
PLXDC1
FOXS1
PTK2
MAP1LC3A
CBX6
FOXF1
MAP3K7CL
MXRA5
TINAGL1
GSTM3
CPQ
EDNRA
RBMS3
COL14A1
C3
RBMS1
FBLN5
PTCH1
EFEMP1
TWSG1
PARVA
FHL2
EFHD1
GEM
RAB31
ADH1B
PTGIR
TNS1
GPX8
ARID5B
PFN2
CPM
MYO1B
LURAP1L
NDRG2
SERPINE2
JAG1
PLN
PLEKHH2
TUBB6
HTRA1
CCDC102B
SEMA5A
FAM114A1
PRR16
AGT
LBH
SMOC2
SRPX
RCN2
PBX1
RERGL
HIGD1B
EBF1
GNAI1
PDE1A
LRP1
CARHSP1
PHACTR2
SPATS2L
PRKG1
CDH6
LAMB1
COL15A1
PDLIM2
HNMT
ENAH
GOLIM4
TMEM98
ANGPTL2
RCN3
THBS1
DLC1
PTGS1
UACA
CD248
CHN1
ANGPT2
TRPA1
GPC6
IL1R1
ZFHX3
FILIP1
LIMS1
HAAO
FKBP7
PTP4A3
SGIP1
MRGPRF
SGCB
FMO3
RND3
CNN1
FOS
LMOD1
MMP14
C1orf21
SNCG
SOCS3
CRIM1
TMEM100
FIBIN
NTN4
NSG1
BCAM
PROS1
GLT8D2
FBLIM1
HES1
PAMR1
GJA4
RUNX1T1
CTSF
FCGRT
CD36
MRC2
SPTSSA
NFIB
FAM162B
ALDH1A3
GJA1
NCKAP1
ISLR
CPE
HSPB2
VASN
OAF
IGFBP3
OLFML2A
SERPINI1
PDGFD
EMID1
MGLL
FGF7
WLS
SGCA
LRRC32
RHOBTB3
KCNMB1
HES4
C1orf54
ARHGAP29
SVIL
PAPPA
PHLDB1
MAP7D3
CEBPD
PRKAR2B
TSPAN12
ESAM
P4HA2
RBFOX2
CRIP1
TMEM204
TNXB
PPP1R12B
ECM2
PLEKHA5
HSD17B2
DIO2
CCDC3
ADAMTS1
PSD3
TMEM119
FARP1
NOVA1
OSBPL1A
CFL2
NUDT4
SMPDL3A
RERG
PDLIM5
PDLIM4
COL4A5
PTPRG
CD302
BICC1
NEURL1B
GJC1
GNG12
LOX
PLXDC2
ARHGEF17
TNS3
TNC
EVA1B
KNOP1
ARMCX1
PITX1
TCEAL7
YAP1
FABP4
IL34
DMD
ITGA7
LMCD1
PEAK1
F10
HSPB6
C1QTNF1
LGI4
LTBP2
PON2
LSAMP
MSC
KCNE4
FOXF2
RPS6KA2
FAM20C
KCNS3
WNT5A
CAMK2N1
FAM13C
ATP2B4
PHLDA2
NEGR1
RGS16
GBP2
NREP
CISD1
OLFML1
CPED1
BMP1
ECE1
CCND2
DAB2
SORBS2
ID4
PAG1
PDK4
GTF2H5
NFASC
CXCL12
ADM
KITLG
APCDD1
SMARCA1
ENHO
WWTR1
ITPRIPL2
ABI3BP
SLIT3
RASL12
PRRX1
SLCO3A1
MMP11
CTSO
CSPG4
PODN
EGFL6
AAMDC
HEBP1
PMEPA1
PLK2
KLHL23
KCNJ8
GUCY1A2
ADAP2
CDH13
MYO1C
ABI2
CHD9
C1QTNF2
SSPN
GSTA4
TDO2
ELN
PDGFA
GBP1
SULF1
CCND1
CXCL1
CAMTA1
HTRA3
RUNX1
CTHRC1
UTRN
RGS10
CHI3L1
SELENBP1
ROCK1
GULP1
RIN2
CLMN
NDUFAF4
TSHZ2
TNFRSF12A
PTPRS
MT1M
MEF2C
DMKN
MMP1

## Sheet: Legends
Marker genes for each scRNA-seq cluster.
Raw sc-RNA count matrix obtained from (2022, Kim, Cho, NPJ Precis. Oncol.) and data processed with Seurat R package.
