# Supplementary material for: Machine learning identifies activation of RUNX/AP-1 as drivers of mesenchymal and fibrotic regulatory programs in gastric cancer
Source: HighWire-hosted journal article supplement (doi:10.1101/gr.278565.123), 2024-05-01
Supplement: Supplemental_Table_S5.xlsx [file Supplemental_Table_S5.xlsx]

## Sheet: CDS mutation counts-GC lines
Total number of CDS mutations in different categories across the 25 GC cell lines
missense_variant	missense_variant&splice_region_variant
19371	471
splice_donor_variant&intron_variant	start_lost
7	27
stop_gained	stop_gained&splice_region_variant
609	17
stop_lost	stop_lost&splice_region_variant
27	6

## Sheet: Legends
Number of coding mutations in different categories across the 25 GC cell lines
WGS Mutations were called using SMuRF (Huang et al., 2022) as described in Methods.
Mutation types (stop_gained, stop_lost, etc.) are limited to the ones with at least 5 occurrences among the 25 GC cell lines.
